# Supplementary material
Source: publisher figshare collection journal article supplement (https://frontiersin.figshare.com/ndownloader/files/18790898)
Supplement: Supplementary file [file 18790898]

>ABC1-15

TTTCCGTAGGTGAACCTGCGGAAGGATCATTATTGAATTATGTTTCTAGATAGGTTGTAG  
CTGGCTCTTTTAGAGCATGTGCACGCCTGTTTGGACTTCATTTTCATCCACCTGTGCACC  
TATTGTAGTCTTTGGTTGGGTTAGGAGGAAGTGATCATTGTATCAGCATCTGCTGGGAGT  
GAGGACTTGCATTGTGAAAGCTTTGCTGTCCTTGATGTGATCATGGAATCTTTTTCTCAC  
TAGAGTCTATGTCACCTCATTATACTCTGTCTGAATGTCATTGAATGTCTTTACATGGGCTT  
GTATGCCTATGAAAATTGTAATACAACCTTTCAGCAACGGATCTCTTGGCTCTCGCATCGA  
TGAAGAACGCAGCGAAATGCGATAAGTAATGTGAATTGCAGAATTCAGTGAATCATCGAA  
TCTTTGAACGCATCTTGCCTCCTTGGTATTCCGAGGAGCATGCCTGTTTGAGTGTCTATT  
AAATTCTCAACTCTCTTATAC-TTTTTGTAAAAGAGAGCTTGGACTGTGGAGGCTTGCT  
GGCCACTTTTTGGGGTCAGCTCCTCTGAAATGCATTAGCGGAACCGTTTGCGATCTGCCA  
CAAGTGTGATAAGTTATCTACACTGGCGAGGGGATTGCTCTCTGTAATGTTTCAGCTTCTA  
ATTGTCTCTACTTTGTGAGACTACTTTTGAATGCTTGACCTCAAATCAGGTAGGACTACC  
CGCTGAACTTAA

>ABC2-3

TTTCCGTAGGTGAACCTGCGGAAGGATCATTATTGAATTATGTTTCTAGATAGGTTGTAG  
CTGGCTCTTTTAGAGCATGTGCACGCCTGTTTGGACTTCATTTTCATCCACCTGTGCACC  
TATTGTAGTCTTTGGTTGGGTTAGGAGGAAGTGATCATTGTATCAGCATCTGCTGGGAGT  
GAGGACTTGCATTGTGAAAGCTTTGCTGTCCTTGATGTGATCATGGAATCTTTTTCTCAC  
TAGAGTCTATGTCACCTCATTATACTCTGTCTGAATGTCATTGAATGTCTTTACATGGGCTT  
GTATGCCTATGAAAATTGTAATACAACCTTTCAGCAACGGATCTCTTGGCTCTCGCATCGA  
TGAAGAACGCAGCGAAATGCGATAAGTAATGTGAATTGCAGAATTCAGTGAATCATCGAA  
TCTTTGAACGCATCTTGCCTCCTTGGTATTCCGAGGAGCATGCCTGTTTGAGTGTCTATT  
AAATTCTCAACTCTCTTATAC-TTTTTGTAAAAGAGAGCTTGGACTGTGGAGGCTTGCT  
GGCCACTTTTTGGGGTCAGCTCCTCTGAAATGCATTAGCGGAACCGTTTGCGATCTGCCA  
CAAGTGTGATAAGTTATCTACACTGGCGAGGGGATTGCTCTCTGTAATGTTTCAGCTTCTA  
ATTGTCTCTACTTTGTGAGACTACTTTTGAATGCTTGACCTCAAATCAGGTAGGACTACC  
CGCTGAACTTAA

>ABC2-8

TTTCCGTAGGTGAACCTGCGGAAGGATCATTATTGAATTATGTTTCTAGATAGGTTGTAG  
CTGGCTCTTTTAGAGCATGTGCACGCCTGTTTGGACTTCATTTTCATCCACCTGTGCACC  
TATTGTAGTCTTTGGTTGGGTTAGGAGGAAGTGATCATTGTATCAGCATCTGCTGGGAGT  
GAGGACTTGCATTGTGAAAGCTTTGCTGTCCTTGATGTGATCATGGAATCTTTTTCTCAC  
TAGAGTCTATGTCACCTCATTATACTCTGTCTGAATGTCATTGAATGTCTTTACATGGGCTT  
GTATGCCTATGAAAATTGTAATACAACCTTTCAGCAACGGATCTCTTGGCTCTCGCATCGA  
TGAAGAACGCAGCGAAATGCGATAAGTAATGTGAATTGCAGAATTCAGTGAATCATCGAA  
TCTTTGAACGCATCTTGCCTCCTTGGTATTCCGAGGAGCATGCCTGTTTGAGTGTCTATT  
AAATTCTCAACTCTCTTATAC-TTTTTGTAAAAGAGAGCTTGGACTGTGGAGGCTTGCT  
GGCCACTTTTTGGGGTCAGCTCCTCTGAAATGCATTAGCGGAACCGTTTGCGATCTGCCA  
CAAGTGTGATAAGTTATCTACACTGGCGAGGGGATTGCTCTCTGTAATGTTTCAGCTTCTA  
ATTGTCTCTACTTTGTGAGACTACTTTTGAATGCTTGACCTCAAATCAGGTAGGACTACC  
CGCTGAACTTAA

>ABC2-25

TTTCCGTAGGTGAACCTGCGGAAGGATCATTATTGAATTATGTTTCTAGATAGGTTGTAG  
CTGGCTCTTTTAGAGCATGTGCACGCCTGTTTGGACTTCATTTTCATCCACCTGTGCACC  
TATTGTAGTCTTTGGTTGGGTTAGGAGGAAGTGATCATTGTATCAGCATCTGCTGGGAGT  
GAGGACTTGCATTGTGAAAGCTTTGCTGTCCTTGATGTGATCATGGAATCTTTTTCTCAC  
TAGAGTCTATGTCACCTCATTATACTCTGTCTGAATGTCATTGAATGTCTTTACATGGGCTT  
GTATGCCTATGAAAATTGTAATACAACCTTTCAGCAACGGATCTCTTGGCTCTCGCATCGA  
TGAAGAACGCAGCGAAATGCGATAAGTAATGTGAATTGCAGAATTCAGTGAATCATCGAA



TCTTTGAACGCATCTTGCGCTCCTTGGTATTCCGAGGAGCATGCCTGTTTGAGTGTCAATT  
AAATTCTCAACTCTCTTATAC-TTTTTGTAAAAGAGAGCTTGGACTGTGGAGGCTTGCT  
GGCCACTTTTTGGGGTCAGCTCCTCTGAAATGCATTAGCGGAACCGTTTGCGATCTGCCA  
CAAGTGTGATAAGTTATCTACACTGGCGAGGGGATTGCTCTCTGTAATGTTGAGCTTCTA  
ATTGTCTCTACTTTGTGAGACTACTTTTGAATGCTTGACCTCAAATCAGGTAGGACTACC  
CGCTGAACTTAA

>ABC2-76

TTTCCGTAGGTGAACCTGCGGAAGGATCATTATTGAATTATGTTTCTAGATAGGTTGTAG  
CTGGCTCTTTTAGAGCATGTGCACGCCTGTTTGGACTTCATTTTCATCCACCTGTGCACC  
TATTGTAGTCTTTGGTTGGGTTAGGAGGAAGTGATCATTGTATCAGCATCTGCTGGGAGT  
GAGGACTTGCAATTGTGAAAGCTTTGCTGTCTTGATGTGATCATGGAATCTTTTCTCAC  
TAGAGTCTATGTCACTCATTATACTCTGTGCAATGTCATTGAATGTCTTACATGGGCTT  
GTATGCCTATGAAAATTGTAATACAACCTTTCAGCAACGGATCTCTTGGCTCTCGCATCGA  
TGAAGAACGCAGCGAAATGCGATAAGTAATGTGAATTGCAGAATTCAGTGAATCATCGAA  
TCTTTGAACGCATCTTGCGCTCCTTGGTATTCCGAGGAGCATGCCTGTTTGAGTGTCAATT  
AAATTCTCAACTCTCTTATAC-TTTTTGTAAAAGAGAGCTTGGACTGTGGAGGCTTGCT  
GGCCACTTTTTGGGGTCAGCTCCTCTGAAATGCATTAGCGGAACCGTTTGCGATCTGCCA  
CAAGTGTGATAAGTTATCTACACTGGCGAGGGGATTGCTCTCTGTAATGTTGAGCTTCTA  
ATTGTCTCTACTTTGTGAGACTACTTTTGAATGCTTGACCTCAAATCAGGTAGGACTACC  
CGCTGAACTTAA

>ABC5-37

TTTCCGTAGGTGAACCTGCGGAAGGATCATTATTGAATTATGTTTCTAGATAGGTTGTAG  
CTGGCTCTTTTAGAGCATGTGCACGCCTGTTTGGACTTCATTTTCATCCACCTGTGCACC  
TATTGTAGTCTTTGGTTGGGTTAGGAGGAAGTGATCATTGTATCAGCATCTGCTGGGAGT  
GAGGACTTGCAATTGTGAAAGCTTTGCTGTCTTGATGTGATCATGGAATCTTTTCTCAC  
TAGAGTCTATGTCACTCATTATACTCTGTGCAATGTCATTGAATGTCTTACATGGGCTT  
GTATGCCTATGAAAATTGTAATACAACCTTTCAGCAACGGATCTCTTGGCTCTCGCATCGA  
TGAAGAACGCAGCGAAATGCGATAAGTAATGTGAATTGCAGAATTCAGTGAATCATCGAA  
TCTTTGAACGCATCTTGCGCTCCTTGGTATTCCGAGGAGCATGCCTGTTTGAGTGTCAATT  
AAATTCTCAACTCTCTTATAC-TTTTTGTAAAAGAGAGCTTGGACTGTGGAGGCTTGCT  
GGCCACTTTTTGGGGTCAGCTCCTCTGAAATGCATTAGCGGAACCGTTTGCGATCTGCCA  
CAAGTGTGATAAGTTATCTACACTGGCGAGGGGATTGCTCTCTGTAATGTTGAGCTTCTA  
ATTGTCTCTACTTTGTGAGACTACTTTTGAATGCTTGACCTCAAATCAGGTAGGACTACC  
CGCTGAACTTAA

>ABC7-44

TTTCCGTAGGTGAACCTGCGGAAGGATCATTATTGAATTATGTTTCTAGATAGGTTGTAG  
CTGGCTCTTTTAGAGCATGTGCACGCCTGTTTGGACTTCATTTTCATCCACCTGTGCACC  
TATTGTAGTCTTTGGTTGGGTTAGGAGGAAGTGATCATTGTATCAGCATCTGCTGGGAGT  
GAGGACTTGCAATTGTGAAAGCTTTGCTGTCTTGATGTGATCATGGAATCTTTTCTCAC  
TAGAGTCTATGTCACTCATTATACTCTGTGCAATGTCATTGAATGTCTTACATGGGCTT  
GTATGCCTATGAAAATTGTAATACAACCTTTCAGCAACGGATCTCTTGGCTCTCGCATCGA  
TGAAGAACGCAGCGAAATGCGATAAGTAATGTGAATTGCAGAATTCAGTGAATCATCGAA  
TCTTTGAACGCATCTTGCGCTCCTTGGTATTCCGAGGAGCATGCCTGTTTGAGTGTCAATT  
AAATTCTCAACTCTCTTATAC-TTTTTGTAAAAGAGAGCTTGGACTGTGGAGGCTTGCT  
GGCCACTTTTTGGGGTCAGCTCCTCTGAAATGCATTAGCGGAACCGTTTGCGATCTGCCA  
CAAGTGTGATAAGTTATCTACACTGGCGAGGGGATTGCTCTCTGTAATGTTGAGCTTCTA  
ATTGTCTCTACTTTGTGAGACTACTTTTGAATGCTTGACCTCAAATCAGGTAGGACTACC  
CGCTGAACTTAA

>ABC1-16

TTTCCGTAGGTGAACCTGCGGAAGGATCATTATTGAATTATGTTTCTAGATAGGTTGTAG



CTGGCTCTTTTAGAGCATGTGCACGCCTGTTTGGACTTCATTTTCATCCACCTGTGCACC  
TATTGTAGTCTTTGGTTGGGTTAGGAGGAAGTGATCATTGTATCAGCATCTGCTGGGAGT  
GAGGACTTGCATTGTGAAAGCTTTGCTGTCCTTGATGTGATCATGGAATCTTTTCTCAC  
TAGAGTCTATGTCACCTATTATACTCTGTGCAATGTCATTGAATGTCTTTACATGGGCTT  
GTATGCCTATGAAAATTGTAATAACAACCTTTCAGCAACGGATCTCTTGGCTCTCGCATCGA  
TGAAGAACGCAGCGAAATGCGATAAGTAATGTGAATTGCAGAATTCAGTGAATCATCGAA  
TCTTTGAACGCATCTTGCCTCCTTGGTATTCCGAGGAGCATGCCTGTTTGAGTGTCAAT  
AAATTCTCAACTCTCTTATAC-TTTTTTGTAAGAGAGCTTGGACTGTGGAGGCTTGCT  
GGCCACTTTTTGGGGTCAGCTCCTCTGAAATGCATTAGCGGAACCGTTTGCGATCTGCCA  
CAAGTGTGATAAGTTATCTACACTGGCGAGGGGATTGCTCTCTGTAATGTTGAGCTTCTA  
ATTGTCTCTACTTTGTGAGACTACTTTTGAATGCTTGACCTCAAATCAGGTAGGACTACC  
CGCTGAACTTAA

>ABC1-22

TTTCCGTAGGTGAACCTGCGGAAGGATCATTATTGAATTATGTTTCTAGATAGGTTGTAG  
CTGGCTCTTTTAGAGCATGTGCACGCCTGTTTGGACTTCATTTTCATCCACCTGTGCACC  
TATTGTAGTCTTTGGTTGGGTTAGGAGGAAGTGATCATTGTATCAGCATCTGCTGGGAGT  
GAGGACTTGCATTGTGAAAGCTTTGCTGTCCTTGATGTGATCATGGAATCTTTTCTCAC  
TAGAGTCTATGTCACCTATTATACTCTGTGCAATGTCATTGAATGTCTTTACATGGGCTT  
GTATGCCTATGAAAATTGTAATAACAACCTTTCAGCAACGGATCTCTTGGCTCTCGCATCGA  
TGAAGAACGCAGCGAAATGCGATAAGTAATGTGAATTGCAGAATTCAGTGAATCATCGAA  
TCTTTGAACGCATCTTGCCTCCTTGGTATTCCGAGGAGCATGCCTGTTTGAGTGTCAAT  
AAATTCTCAACTCTCTTATAC-TTTTTTGTAAGAGAGCTTGGACTGTGGAGGCTTGCT  
GGCCACTTTTTGGGGTCAGCTCCTCTGAAATGCATTAGCGGAACCGTTTGCGATCTGCCA  
CAAGTGTGATAAGTTATCTACACTGGCGAGGGGATTGCTCTCTGTAATGTTGAGCTTCTA  
ATTGTCTCTACTTTGTGAGACTACTTTTGAATGCTTGACCTCAAATCAGGTAGGACTACC  
CGCTGAACTTAA

>ABC1-24

TTTCCGTAGGTGAACCTGCGGAAGGATCATTATTGAATTATGTTTCTAGATAGGTTGTAG  
CTGGCTCTTTTAGAGCATGTGCACGCCTGTTTGGACTTCATTTTCATCCACCTGTGCACC  
TATTGTAGTCTTTGGTTGGGTTAGGAGGAAGTGATCATTGTATCAGCATCTGCTGGGAGT  
GAGGACTTGCATTGTGAAAGCTTTGCTGTCCTTGATGTGATCATGGAATCTTTTCTCAC  
TAGAGTCTATGTCACCTATTATACTCTGTGCAATGTCATTGAATGTCTTTACATGGGCTT  
GTATGCCTATGAAAATTGTAATAACAACCTTTCAGCAACGGATCTCTTGGCTCTCGCATCGA  
TGAAGAACGCAGCGAAATGCGATAAGTAATGTGAATTGCAGAATTCAGTGAATCATCGAA  
TCTTTGAACGCATCTTGCCTCCTTGGTATTCCGAGGAGCATGCCTGTTTGAGTGTCAAT  
AAATTCTCAACTCTCTTATAC-TTTTTTGTAAGAGAGCTTGGACTGTGGAGGCTTGCT  
GGCCACTTTTTGGGGTCAGCTCCTCTGAAATGCATTAGCGGAACCGTTTGCGATCTGCCA  
CAAGTGTGATAAGTTATCTACACTGGCGAGGGGATTGCTCTCTGTAATGTTGAGCTTCTA  
ATTGTCTCTACTTTGTGAGACTACTTTTGAATGCTTGACCTCAAATCAGGTAGGACTACC  
CGCTGAACTTAA

>ABC1-25

TTTCCGTAGGTGAACCTGCGGAAGGATCATTATTGAATTATGTTTCTAGATAGGTTGTAG  
CTGGCTCTTTTAGAGCATGTGCACGCCTGTTTGGACTTCATTTTCATCCACCTGTGCACC  
TATTGTAGTCTTTGGTTGGGTTAGGAGGAAGTGATCATTGTATCAGCATCTGCTGGGAGT  
GAGGACTTGCATTGTGAAAGCTTTGCTGTCCTTGATGTGATCATGGAATCTTTTCTCAC  
TAGAGTCTATGTCACCTATTATACTCTGTGCAATGTCATTGAATGTCTTTACATGGGCTT  
GTATGCCTATGAAAATTGTAATAACAACCTTTCAGCAACGGATCTCTTGGCTCTCGCATCGA  
TGAAGAACGCAGCGAAATGCGATAAGTAATGTGAATTGCAGAATTCAGTGAATCATCGAA  
TCTTTGAACGCATCTTGCCTCCTTGGTATTCCGAGGAGCATGCCTGTTTGAGTGTCAAT  
AAATTCTCAACTCTCTTATAC-TTTTTTGTAAGAGAGCTTGGACTGTGGAGGCTTGCT



GGCCACTTTTTGGGGTCAGCTCCTCTGAAATGCATTAGCGGAACCGTTTGCGATCTGCCA  
CAAGTGTGATAAGTTATCTACACTGGCGAGGGGATTGCTCTCTGTAATGTTGAGCTTCTA  
ATTGTCTCTACTTTGTGAGACTACTTTTGAATGCTTGACCTCAAATCAGGTAGGACTACC  
CGCTGAACTTAA

>ABC1-27

TTTCCGTAGGTGAACCTGCGGAAGGATCATTATTGAATTATGTTTCTAGATAGGTTGTAG  
CTGGCTCTTTTAGAGCATGTGCACGCCTGTTTGGACTTCATTTTCATCCACCTGTGCACC  
TATTGTAGTCTTTGGTTGGGTTAGGAGGAAGTGATCATTGTATCAGCATCTGCTGGGAGT  
GAGGACTTGCATTGTGAAAGCTTTGCTGTCCTTGATGTGATCATGGAATCTTTTTCTCAC  
TAGAGTCTATGTCACTCATTATACTCTGTGCAATGTCATTGAATGTCTTTACATGGGCTT  
GTATGCCTATGAAAATTGTAATACTTTTTCAGCAACGGATCTCTTGGCTCTCGCATCGA  
TGAAGAACGCAGCGAAATGCGATAAGTAATGTGAATTGCAGAATTCAGTGAATCATCGAA  
TCTTTGAACGCATCTTGCGCTCCTTGGTATTCCGAGGAGCATGCCTGTTTGAGTGTCAAT  
AAATTCTCAACTCTCTTATAC-TTTTTGTAAAAGAGAGCTTGGACTGTGGAGGCTTGCT  
GGCCACTTTTTGGGGTCAGCTCCTCTGAAATGCATTAGCGGAACCGTTTGCGATCTGCCA  
CAAGTGTGATAAGTTATCTACACTGGCGAGGGGATTGCTCTCTGTAATGTTGAGCTTCTA  
ATTGTCTCTACTTTGTGAGACTACTTTTGAATGCTTGACCTCAAATCAGGTAGGACTACC  
CGCTGAACTTAA

>ABC1-30

TTTCCGTAGGTGAACCTGCGGAAGGATCATTATTGAATTATGTTTCTAGATAGGTTGTAG  
CTGGCTCTTTTAGAGCATGTGCACGCCTGTTTGGACTTCATTTTCATCCACCTGTGCACC  
TATTGTAGTCTTTGGTTGGGTTAGGAGGAAGTGATCATTGTATCAGCATCTGCTGGGAGT  
GAGGACTTGCATTGTGAAAGCTTTGCTGTCCTTGATGTGATCATGGAATCTTTTTCTCAC  
TAGAGTCTATGTCACTCATTATACTCTGTGCAATGTCATTGAATGTCTTTACATGGGCTT  
GTATGCCTATGAAAATTGTAATACTTTTTCAGCAACGGATCTCTTGGCTCTCGCATCGA  
TGAAGAACGCAGCGAAATGCGATAAGTAATGTGAATTGCAGAATTCAGTGAATCATCGAA  
TCTTTGAACGCATCTTGCGCTCCTTGGTATTCCGAGGAGCATGCCTGTTTGAGTGTCAAT  
AAATTCTCAACTCTCTTATAC-TTTTTGTAAAAGAGAGCTTGGACTGTGGAGGCTTGCT  
GGCCACTTTTTGGGGTCAGCTCCTCTGAAATGCATTAGCGGAACCGTTTGCGATCTGCCA  
CAAGTGTGATAAGTTATCTACACTGGCGAGGGGATTGCTCTCTGTAATGTTGAGCTTCTA  
ATTGTCTCTACTTTGTGAGACTACTTTTGAATGCTTGACCTCAAATCAGGTAGGACTACC  
CGCTGAACTTAA

>ABC1-33

TTTCCGTAGGTGAACCTGCGGAAGGATCATTATTGAATTATGTTTCTAGATAGGTTGTAG  
CTGGCTCTTTTAGAGCATGTGCACGCCTGTTTGGACTTCATTTTCATCCACCTGTGCACC  
TATTGTAGTCTTTGGTTGGGTTAGGAGGAAGTGATCATTGTATCAGCATCTGCTGGGAGT  
GAGGACTTGCATTGTGAAAGCTTTGCTGTCCTTGATGTGATCATGGAATCTTTTTCTCAC  
TAGAGTCTATGTCACTCATTATACTCTGTGCAATGTCATTGAATGTCTTTACATGGGCTT  
GTATGCCTATGAAAATTGTAATACTTTTTCAGCAACGGATCTCTTGGCTCTCGCATCGA  
TGAAGAACGCAGCGAAATGCGATAAGTAATGTGAATTGCAGAATTCAGTGAATCATCGAA  
TCTTTGAACGCATCTTGCGCTCCTTGGTATTCCGAGGAGCATGCCTGTTTGAGTGTCAAT  
AAATTCTCAACTCTCTTATAC-TTTTTGTAAAAGAGAGCTTGGACTGTGGAGGCTTGCT  
GGCCACTTTTTGGGGTCAGCTCCTCTGAAATGCATTAGCGGAACCGTTTGCGATCTGCCA  
CAAGTGTGATAAGTTATCTACACTGGCGAGGGGATTGCTCTCTGTAATGTTGAGCTTCTA  
ATTGTCTCTACTTTGTGAGACTACTTTTGAATGCTTGACCTCAAATCAGGTAGGACTACC  
CGCTGAACTTAA

>ABC1-36

TTTCCGTAGGTGAACCTGCGGAAGGATCATTATTGAATTATGTTTCTAGATAGGTTGTAG  
CTGGCTCTTTTAGAGCATGTGCACGCCTGTTTGGACTTCATTTTCATCCACCTGTGCACC  
TATTGTAGTCTTTGGTTGGGTTAGGAGGAAGTGATCATTGTATCAGCATCTGCTGGGAGT



GAGGACTTGCATTGTGAAAGCTTTGCTGTCCTTGATGTGATCATGGAATCTTTTTCTCAC  
TAGAGTCTATGTCACCTATTATACTCTGTGCAATGTCATTGAATGTCTTTACATGGGCTT  
GTATGCCTATGAAAATTGTAATACAACCTTTCAGCAACGGATCTCTTGGCTCTCGCATCGA  
TGAAGAACGCAGCGAAATGCGATAAGTAATGTGAATTGCAGAATTCAGTGAATCATCGAA  
TCTTTGAACGCATCTTGCGCTCCTTGGTATTCCGAGGAGCATGCCTGTTTGAGTGTGATT  
AAATTCTCAACTCTCTTATAC-TTTTTGTAAAAGAGAGCTTGGACTGTGGAGGCTTGCT  
GGCCACTTTTTGGGGTCAGCTCCTCTGAAATGCATTAGCGGAACCGTTTGCGATCTGCCA  
CAAGTGTGATAAGTTATCTACACTGGCGAGGGGATTGCTCTCTGTAATGTTTCACTTCTA  
ATTGTCTCTACTTTGTGAGACTACTTTTGAATGCTTGACCTCAAATCAGGTAGGACTACC  
CGCTGAACTTAA

>ABC1-43

TTTCCGTAGGTGAACCTGCGGAAGGATCATTATTGAATTATGTTTCTAGATAGGTTGTAG  
CTGGCTCTTTTAGAGCATGTGCACGCCTGTTTGGACTTCATTTTCATCCACCTGTGCACC  
TATTGTAGTCTTTGGTTGGGTTAGGAGGAAGTGATCATTGTATCAGCATCTGCTGGGAGT  
GAGGACTTGCATTGTGAAAGCTTTGCTGTCCTTGATGTGATCATGGAATCTTTTTCTCAC  
TAGAGTCTATGTCACCTATTATACTCTGTGCAATGTCATTGAATGTCTTTACATGGGCTT  
GTATGCCTATGAAAATTGTAATACAACCTTTCAGCAACGGATCTCTTGGCTCTCGCATCGA  
TGAAGAACGCAGCGAAATGCGATAAGTAATGTGAATTGCAGAATTCAGTGAATCATCGAA  
TCTTTGAACGCATCTTGCGCTCCTTGGTATTCCGAGGAGCATGCCTGTTTGAGTGTGATT  
AAATTCTCAACTCTCTTATAC-TTTTTGTAAAAGAGAGCTTGGACTGTGGAGGCTTGCT  
GGCCACTTTTTGGGGTCAGCTCCTCTGAAATGCATTAGCGGAACCGTTTGCGATCTGCCA  
CAAGTGTGATAAGTTATCTACACTGGCGAGGGGATTGCTCTCTGTAATGTTTCACTTCTA  
ATTGTCTCTACTTTGTGAGACTACTTTTGAATGCTTGACCTCAAATCAGGTAGGACTACC  
CGCTGAACTTAA

>ABC1-46

TTTCCGTAGGTGAACCTGCGGAAGGATCATTATTGAATTATGTTTCTAGATAGGTTGTAG  
CTGGCTCTTTTAGAGCATGTGCACGCCTGTTTGGACTTCATTTTCATCCACCTGTGCACC  
TATTGTAGTCTTTGGTTGGGTTAGGAGGAAGTGATCATTGTATCAGCATCTGCTGGGAGT  
GAGGACTTGCATTGTGAAAGCTTTGCTGTCCTTGATGTGATCATGGAATCTTTTTCTCAC  
TAGAGTCTATGTCACCTATTATACTCTGTGCAATGTCATTGAATGTCTTTACATGGGCTT  
GTATGCCTATGAAAATTGTAATACAACCTTTCAGCAACGGATCTCTTGGCTCTCGCATCGA  
TGAAGAACGCAGCGAAATGCGATAAGTAATGTGAATTGCAGAATTCAGTGAATCATCGAA  
TCTTTGAACGCATCTTGCGCTCCTTGGTATTCCGAGGAGCATGCCTGTTTGAGTGTGATT  
AAATTCTCAACTCTCTTATAC-TTTTTGTAAAAGAGAGCTTGGACTGTGGAGGCTTGCT  
GGCCACTTTTTGGGGTCAGCTCCTCTGAAATGCATTAGCGGAACCGTTTGCGATCTGCCA  
CAAGTGTGATAAGTTATCTACACTGGCGAGGGGATTGCTCTCTGTAATGTTTCACTTCTA  
ATTGTCTCTACTTTGTGAGACTACTTTTGAATGCTTGACCTCAAATCAGGTAGGACTACC  
CGCTGAACTTAA

>ABC1-48

TTTCCGTAGGTGAACCTGCGGAAGGATCATTATTGAATTATGTTTCTAGATAGGTTGTAG  
CTGGCTCTTTTAGAGCATGTGCACGCCTGTTTGGACTTCATTTTCATCCACCTGTGCACC  
TATTGTAGTCTTTGGTTGGGTTAGGAGGAAGTGATCATTGTATCAGCATCTGCTGGGAGT  
GAGGACTTGCATTGTGAAAGCTTTGCTGTCCTTGATGTGATCATGGAATCTTTTTCTCAC  
TAGAGTCTATGTCACCTATTATACTCTGTGCAATGTCATTGAATGTCTTTACATGGGCTT  
GTATGCCTATGAAAATTGTAATACAACCTTTCAGCAACGGATCTCTTGGCTCTCGCATCGA  
TGAAGAACGCAGCGAAATGCGATAAGTAATGTGAATTGCAGAATTCAGTGAATCATCGAA  
TCTTTGAACGCATCTTGCGCTCCTTGGTATTCCGAGGAGCATGCCTGTTTGAGTGTGATT  
AAATTCTCAACTCTCTTATAC-TTTTTGTAAAAGAGAGCTTGGACTGTGGAGGCTTGCT  
GGCCACTTTTTGGGGTCAGCTCCTCTGAAATGCATTAGCGGAACCGTTTGCGATCTGCCA  
CAAGTGTGATAAGTTATCTACACTGGCGAGGGGATTGCTCTCTGTAATGTTTCACTTCTA



ATTGTCTCTACTTTGTGAGACTACTTTTGAATGCTTGACCTCAAATCAGGTAGGACTACC  
CGCTGAACTTAA

>ABC1-50

TTTCCGTAGGTGAACCTGCGGAAGGATCATTATTGAATTATGTTTCTAGATAGGTTGTAG  
CTGGCTCTTTTAGAGCATGTGCACGCCTGTTTGGACTTCATTTTCATCCACCTGTGCACC  
TATTGTAGTCTTTGGTTGGGTTAGGAGGAAGTGATCATTGTATCAGCATCTGCTGGGAGT  
GAGGACTTGCATTGTGAAAGCTTTGCTGTCCTTGATGTGATCATGGAATCTTTTTCTCAC  
TAGAGTCTATGTCACTCATTATACTCTGTGCAATGTCATTGAATGTCTTTACATGGGCTT  
GTATGCCTATGAAAATTGTAATAACAACCTTTCAGCAACGGATCTCTTGGCTCTCGCATCGA  
TGAAGAACGCAGCGAAATGCGATAAGTAATGTGAATTGCAGAATTCAGTGAATCATCGAA  
TCTTTGAACGCATCTTGCCTCCTTGGTATTCCGAGGAGCATGCCTGTTTGAGTGTCAAT  
AAATTCTCAACTCTCTTATAC-TTTTTGTAAAAGAGAGCTTGGACTGTGGAGGCTTGCT  
GGCCACTTTTTGGGGTCAGCTCCTCTGAAATGCATTAGCGGAACCGTTTGCGATCTGCCA  
CAAGTGTGATAAGTTATCTA CACTGGCGAGGGGATTGCTCTCTGTAATGTT CAGCTTCTA  
ATTGTCTCTACTTTGTGAGACTACTTTTGAATGCTTGACCTCAAATCAGGTAGGACTACC  
CGCTGAACTTAA

>ABC1-62

TTTCCGTAGGTGAACCTGCGGAAGGATCATTATTGAATTATGTTTCTAGATAGGTTGTAG  
CTGGCTCTTTTAGAGCATGTGCACGCCTGTTTGGACTTCATTTTCATCCACCTGTGCACC  
TATTGTAGTCTTTGGTTGGGTTAGGAGGAAGTGATCATTGTATCAGCATCTGCTGGGAGT  
GAGGACTTGCATTGTGAAAGCTTTGCTGTCCTTGATGTGATCATGGAATCTTTTTCTCAC  
TAGAGTCTATGTCACTCATTATACTCTGTGCAATGTCATTGAATGTCTTTACATGGGCTT  
GTATGCCTATGAAAATTGTAATAACAACCTTTCAGCAACGGATCTCTTGGCTCTCGCATCGA  
TGAAGAACGCAGCGAAATGCGATAAGTAATGTGAATTGCAGAATTCAGTGAATCATCGAA  
TCTTTGAACGCATCTTGCCTCCTTGGTATTCCGAGGAGCATGCCTGTTTGAGTGTCAAT  
AAATTCTCAACTCTCTTATAC-TTTTTGTAAAAGAGAGCTTGGACTGTGGAGGCTTGCT  
GGCCACTTTTTGGGGTCAGCTCCTCTGAAATGCATTAGCGGAACCGTTTGCGATCTGCCA  
CAAGTGTGATAAGTTATCTA CACTGGCGAGGGGATTGCTCTCTGTAATGTT CAGCTTCTA  
ATTGTCTCTACTTTGTGAGACTACTTTTGAATGCTTGACCTCAAATCAGGTAGGACTACC  
CGCTGAACTTAA

>ABC1-64

TTTCCGTAGGTGAACCTGCGGAAGGATCATTATTGAATTATGTTTCTAGATAGGTTGTAG  
CTGGCTCTTTTAGAGCATGTGCACGCCTGTTTGGACTTCATTTTCATCCACCTGTGCACC  
TATTGTAGTCTTTGGTTGGGTTAGGAGGAAGTGATCATTGTATCAGCATCTGCTGGGAGT  
GAGGACTTGCATTGTGAAAGCTTTGCTGTCCTTGATGTGATCATGGAATCTTTTTCTCAC  
TAGAGTCTATGTCACTCATTATACTCTGTGCAATGTCATTGAATGTCTTTACATGGGCTT  
GTATGCCTATGAAAATTGTAATAACAACCTTTCAGCAACGGATCTCTTGGCTCTCGCATCGA  
TGAAGAACGCAGCGAAATGCGATAAGTAATGTGAATTGCAGAATTCAGTGAATCATCGAA  
TCTTTGAACGCATCTTGCCTCCTTGGTATTCCGAGGAGCATGCCTGTTTGAGTGTCAAT  
AAATTCTCAACTCTCTTATAC-TTTTTGTAAAAGAGAGCTTGGACTGTGGAGGCTTGCT  
GGCCACTTTTTGGGGTCAGCTCCTCTGAAATGCATTAGCGGAACCGTTTGCGATCTGCCA  
CAAGTGTGATAAGTTATCTA CACTGGCGAGGGGATTGCTCTCTGTAATGTT CAGCTTCTA  
ATTGTCTCTACTTTGTGAGACTACTTTTGAATGCTTGACCTCAAATCAGGTAGGACTACC  
CGCTGAACTTAA

>ABC1-66

TTTCCGTAGGTGAACCTGCGGAAGGATCATTATTGAATTATGTTTCTAGATAGGTTGTAG  
CTGGCTCTTTTAGAGCATGTGCACGCCTGTTTGGACTTCATTTTCATCCACCTGTGCACC  
TATTGTAGTCTTTGGTTGGGTTAGGAGGAAGTGATCATTGTATCAGCATCTGCTGGGAGT  
GAGGACTTGCATTGTGAAAGCTTTGCTGTCCTTGATGTGATCATGGAATCTTTTTCTCAC  
TAGAGTCTATGTCACTCATTATACTCTGTGCAATGTCATTGAATGTCTTTACATGGGCTT



GTATGCCTATGAAAATTGTAATACAACCTTTTCAGCAACGGATCTCTTGGCTCTCGCATCGA  
TGAAGAACGCAGCGAAATGCGATAAGTAATGTGAATTGCAGAATTCAGTGAATCATCGAA  
TCTTTGAACGCATCTTGCCTCCTTGGTATTCCGAGGAGCATGCCTGTTTGAGTGTCAAT  
AAATTCTCAACTCTCTTATAC-TTTTTTGAAAAGAGAGCTTGGACTGTGGAGGCTTGCT  
GGCCACTTTTTGGGGTCAGCTCCTCTGAAATGCATTAGCGGAACCGTTTGCGATCTGCCA  
CAAGTGTGATAAGTTATCTACACTGGCGAGGGGATTGCTCTCTGTAATGTTTCAGCTTCTA  
ATTGTCTCTACTTTGTGAGACTACTTTTGAATGCTTGACCTCAAATCAGGTAGGACTACC  
CGCTGAACTTAA

>ABC1-73

TTTCCGTAGGTGAACCTGCGGAAGGATCATTATTGAATTATGTTTCTAGATAGGTTGTAG  
CTGGCTCTTTTAGAGCATGTGCACGCCTGTTTGGACTTCATTTTCATCCACCTGTGCACC  
TATTGTAGTCTTTGGTTGGGTTAGGAGGAAGTGATCATTGTATCAGCATCTGCTGGGAGT  
GAGGACTTGCATTGTGAAAGCTTTGCTGTCCTTGATGTGATCATGGAATCTTTTTCTCAC  
TAGAGTCTATGTCACCTCATTATACTCTGTCTGAATGTCATTGAATGTCTTTACATGGGCTT  
GTATGCCTATGAAAATTGTAATACAACCTTTTCAGCAACGGATCTCTTGGCTCTCGCATCGA  
TGAAGAACGCAGCGAAATGCGATAAGTAATGTGAATTGCAGAATTCAGTGAATCATCGAA  
TCTTTGAACGCATCTTGCCTCCTTGGTATTCCGAGGAGCATGCCTGTTTGAGTGTCAAT  
AAATTCTCAACTCTCTTATAC-TTTTTTGAAAAGAGAGCTTGGACTGTGGAGGCTTGCT  
GGCCACTTTTTGGGGTCAGCTCCTCTGAAATGCATTAGCGGAACCGTTTGCGATCTGCCA  
CAAGTGTGATAAGTTATCTACACTGGCGAGGGGATTGCTCTCTGTAATGTTTCAGCTTCTA  
ATTGTCTCTACTTTGTGAGACTACTTTTGAATGCTTGACCTCAAATCAGGTAGGACTACC  
CGCTGAACTTAA

>ABC1-75

TTTCCGTAGGTGAACCTGCGGAAGGATCATTATTGAATTATGTTTCTAGATAGGTTGTAG  
CTGGCTCTTTTAGAGCATGTGCACGCCTGTTTGGACTTCATTTTCATCCACCTGTGCACC  
TATTGTAGTCTTTGGTTGGGTTAGGAGGAAGTGATCATTGTATCAGCATCTGCTGGGAGT  
GAGGACTTGCATTGTGAAAGCTTTGCTGTCCTTGATGTGATCATGGAATCTTTTTCTCAC  
TAGAGTCTATGTCACCTCATTATACTCTGTCTGAATGTCATTGAATGTCTTTACATGGGCTT  
GTATGCCTATGAAAATTGTAATACAACCTTTTCAGCAACGGATCTCTTGGCTCTCGCATCGA  
TGAAGAACGCAGCGAAATGCGATAAGTAATGTGAATTGCAGAATTCAGTGAATCATCGAA  
TCTTTGAACGCATCTTGCCTCCTTGGTATTCCGAGGAGCATGCCTGTTTGAGTGTCAAT  
AAATTCTCAACTCTCTTATAC-TTTTTTGAAAAGAGAGCTTGGACTGTGGAGGCTTGCT  
GGCCACTTTTTGGGGTCAGCTCCTCTGAAATGCATTAGCGGAACCGTTTGCGATCTGCCA  
CAAGTGTGATAAGTTATCTACACTGGCGAGGGGATTGCTCTCTGTAATGTTTCAGCTTCTA  
ATTGTCTCTACTTTGTGAGACTACTTTTGAATGCTTGACCTCAAATCAGGTAGGACTACC  
CGCTGAACTTAA

>ABC1-76

TTTCCGTAGGTGAACCTGCGGAAGGATCATTATTGAATTATGTTTCTAGATAGGTTGTAG  
CTGGCTCTTTTAGAGCATGTGCACGCCTGTTTGGACTTCATTTTCATCCACCTGTGCACC  
TATTGTAGTCTTTGGTTGGGTTAGGAGGAAGTGATCATTGTATCAGCATCTGCTGGGAGT  
GAGGACTTGCATTGTGAAAGCTTTGCTGTCCTTGATGTGATCATGGAATCTTTTTCTCAC  
TAGAGTCTATGTCACCTCATTATACTCTGTCTGAATGTCATTGAATGTCTTTACATGGGCTT  
GTATGCCTATGAAAATTGTAATACAACCTTTTCAGCAACGGATCTCTTGGCTCTCGCATCGA  
TGAAGAACGCAGCGAAATGCGATAAGTAATGTGAATTGCAGAATTCAGTGAATCATCGAA  
TCTTTGAACGCATCTTGCCTCCTTGGTATTCCGAGGAGCATGCCTGTTTGAGTGTCAAT  
AAATTCTCAACTCTCTTATAC-TTTTTTGAAAAGAGAGCTTGGACTGTGGAGGCTTGCT  
GGCCACTTTTTGGGGTCAGCTCCTCTGAAATGCATTAGCGGAACCGTTTGCGATCTGCCA  
CAAGTGTGATAAGTTATCTACACTGGCGAGGGGATTGCTCTCTGTAATGTTTCAGCTTCTA  
ATTGTCTCTACTTTGTGAGACTACTTTTGAATGCTTGACCTCAAATCAGGTAGGACTACC  
CGCTGAACTTAA



>ABC1-78

TTTCCGTAGGTGAACCTGCGGAAGGATCATTATTGAATTATGTTTCTAGATAGGTTGTAG  
CTGGCTCTTTTAGAGCATGTGCACGCCTGTTTGGACTTCATTTTCATCCACCTGTGCACC  
TATTGTAGTCTTTGGTTGGGTTAGGAGGAAGTGATCATTGTATCAGCATCTGCTGGGAGT  
GAGGACTTGCATTGTGAAAGCTTTGCTGTCCTTGATGTGATCATGGAATCTTTTTCTCAC  
TAGAGTCTATGTCACCTCATTATACTCTGTGCGAATGTCATTGAATGTCTTTACATGGGCTT  
GTATGCCTATGAAAATTGTAATACAACCTTTCAGCAACGGATCTCTTGGCTCTCGCATCGA  
TGAAGAACGCAGCGAAATGCGATAAGTAATGTGAATTGCAGAATTCAGTGAATCATCGAA  
TCTTTGAACGCATCTTGCCTCCTTGGTATTCCGAGGAGCATGCCTGTTTGAGTGTCTATT  
AAATTCTCAACTCTCTTATAC-TTTTTGTAAAAGAGAGCTTGGACTGTGGAGGCTTGCT  
GGCCACTTTTTGGGGTCAGCTCCTCTGAAATGCATTAGCGGAACCGTTTGCGATCTGCCA  
CAAGTGTGATAAGTTATCTACACTGGCGAGGGGATTGCTCTCTGTAATGTTTCAGCTTCTA  
ATTGTCTCTACTTTGTGAGACTACTTTTGAATGCTTGACCTCAAATCAGGTAGGACTACC  
CGCTGAACTTAA

>ABC1-79

TTTCCGTAGGTGAACCTGCGGAAGGATCATTATTGAATTATGTTTCTAGATAGGTTGTAG  
CTGGCTCTTTTAGAGCATGTGCACGCCTGTTTGGACTTCATTTTCATCCACCTGTGCACC  
TATTGTAGTCTTTGGTTGGGTTAGGAGGAAGTGATCATTGTATCAGCATCTGCTGGGAGT  
GAGGACTTGCATTGTGAAAGCTTTGCTGTCCTTGATGTGATCATGGAATCTTTTTCTCAC  
TAGAGTCTATGTCACCTCATTATACTCTGTGCGAATGTCATTGAATGTCTTTACATGGGCTT  
GTATGCCTATGAAAATTGTAATACAACCTTTCAGCAACGGATCTCTTGGCTCTCGCATCGA  
TGAAGAACGCAGCGAAATGCGATAAGTAATGTGAATTGCAGAATTCAGTGAATCATCGAA  
TCTTTGAACGCATCTTGCCTCCTTGGTATTCCGAGGAGCATGCCTGTTTGAGTGTCTATT  
AAATTCTCAACTCTCTTATAC-TTTTTGTAAAAGAGAGCTTGGACTGTGGAGGCTTGCT  
GGCCACTTTTTGGGGTCAGCTCCTCTGAAATGCATTAGCGGAACCGTTTGCGATCTGCCA  
CAAGTGTGATAAGTTATCTACACTGGCGAGGGGATTGCTCTCTGTAATGTTTCAGCTTCTA  
ATTGTCTCTACTTTGTGAGACTACTTTTGAATGCTTGACCTCAAATCAGGTAGGACTACC  
CGCTGAACTTAA

>ABC2-5

TTTCCGTAGGTGAACCTGCGGAAGGATCATTATTGAATTATGTTTCTAGATAGGTTGTAG  
CTGGCTCTTTTAGAGCATGTGCACGCCTGTTTGGACTTCATTTTCATCCACCTGTGCACC  
TATTGTAGTCTTTGGTTGGGTTAGGAGGAAGTGATCATTGTATCAGCATCTGCTGGGAGT  
GAGGACTTGCATTGTGAAAGCTTTGCTGTCCTTGATGTGATCATGGAATCTTTTTCTCAC  
TAGAGTCTATGTCACCTCATTATACTCTGTGCGAATGTCATTGAATGTCTTTACATGGGCTT  
GTATGCCTATGAAAATTGTAATACAACCTTTCAGCAACGGATCTCTTGGCTCTCGCATCGA  
TGAAGAACGCAGCGAAATGCGATAAGTAATGTGAATTGCAGAATTCAGTGAATCATCGAA  
TCTTTGAACGCATCTTGCCTCCTTGGTATTCCGAGGAGCATGCCTGTTTGAGTGTCTATT  
AAATTCTCAACTCTCTTATAC-TTTTTGTAAAAGAGAGCTTGGACTGTGGAGGCTTGCT  
GGCCACTTTTTGGGGTCAGCTCCTCTGAAATGCATTAGCGGAACCGTTTGCGATCTGCCA  
CAAGTGTGATAAGTTATCTACACTGGCGAGGGGATTGCTCTCTGTAATGTTTCAGCTTCTA  
ATTGTCTCTACTTTGTGAGACTACTTTTGAATGCTTGACCTCAAATCAGGTAGGACTACC  
CGCTGAACTTAA

>ABC2-6

TTTCCGTAGGTGAACCTGCGGAAGGATCATTATTGAATTATGTTTCTAGATAGGTTGTAG  
CTGGCTCTTTTAGAGCATGTGCACGCCTGTTTGGACTTCATTTTCATCCACCTGTGCACC  
TATTGTAGTCTTTGGTTGGGTTAGGAGGAAGTGATCATTGTATCAGCATCTGCTGGGAGT  
GAGGACTTGCATTGTGAAAGCTTTGCTGTCCTTGATGTGATCATGGAATCTTTTTCTCAC  
TAGAGTCTATGTCACCTCATTATACTCTGTGCGAATGTCATTGAATGTCTTTACATGGGCTT  
GTATGCCTATGAAAATTGTAATACAACCTTTCAGCAACGGATCTCTTGGCTCTCGCATCGA  
TGAAGAACGCAGCGAAATGCGATAAGTAATGTGAATTGCAGAATTCAGTGAATCATCGAA



TCTTTGAACGCATCTTGCGCTCCTTGGTATTCCGAGGAGCATGCCTGTTTGAGTGTCAATT  
AAATTCTCAACTCTCTTATAC-TTTTTGTAAAAGAGAGCTTGGACTGTGGAGGCTTGCT  
GGCCACTTTTTGGGGTCAGCTCCTCTGAAATGCATTAGCGGAACCGTTTGCGATCTGCCA  
CAAGTGTGATAAGTTATCTACACTGGCGAGGGGATTGCTCTCTGTAATGTTGAGCTTCTA  
ATTGTCTCTACTTTGTGAGACTACTTTTGAATGCTTGACCTCAAATCAGGTAGGACTACC  
CGCTGAACTTAA

>ABC2-11

TTTCCGTAGGTGAACCTGCGGAAGGATCATTATTGAATTATGTTTCTAGATAGGTTGTAG  
CTGGCTCTTTTAGAGCATGTGCACGCCTGTTTGGACTTCATTTTCATCCACCTGTGCACC  
TATTGTAGTCTTTGGTTGGGTTAGGAGGAAGTGATCATTGTATCAGCATCTGCTGGGAGT  
GAGGACTTGCAATTGTGAAAGCTTTGCTGTCTTGATGTGATCATGGAATCTTTTCTCAC  
TAGAGTCTATGTCACTCATTATACTCTGTGCAATGTCATTGAATGTCTTTACATGGGCTT  
GTATGCCTATGAAAATTGTAATACAACCTTTGAGCAACGGATCTCTTGGCTCTCGCATCGA  
TGAAGAACGCAGCGAAATGCGATAAGTAATGTGAATTGCAGAATTCAGTGAATCATCGAA  
TCTTTGAACGCATCTTGCGCTCCTTGGTATTCCGAGGAGCATGCCTGTTTGAGTGTCAATT  
AAATTCTCAACTCTCTTATAC-TTTTTGTAAAAGAGAGCTTGGACTGTGGAGGCTTGCT  
GGCCACTTTTTGGGGTCAGCTCCTCTGAAATGCATTAGCGGAACCGTTTGCGATCTGCCA  
CAAGTGTGATAAGTTATCTACACTGGCGAGGGGATTGCTCTCTGTAATGTTGAGCTTCTA  
ATTGTCTCTACTTTGTGAGACTACTTTTGAATGCTTGACCTCAAATCAGGTAGGACTACC  
CGCTGAACTTAA

>ABC2-13

TTTCCGTAGGTGAACCTGCGGAAGGATCATTATTGAATTATGTTTCTAGATAGGTTGTAG  
CTGGCTCTTTTAGAGCATGTGCACGCCTGTTTGGACTTCATTTTCATCCACCTGTGCACC  
TATTGTAGTCTTTGGTTGGGTTAGGAGGAAGTGATCATTGTATCAGCATCTGCTGGGAGT  
GAGGACTTGCAATTGTGAAAGCTTTGCTGTCTTGATGTGATCATGGAATCTTTTCTCAC  
TAGAGTCTATGTCACTCATTATACTCTGTGCAATGTCATTGAATGTCTTTACATGGGCTT  
GTATGCCTATGAAAATTGTAATACAACCTTTGAGCAACGGATCTCTTGGCTCTCGCATCGA  
TGAAGAACGCAGCGAAATGCGATAAGTAATGTGAATTGCAGAATTCAGTGAATCATCGAA  
TCTTTGAACGCATCTTGCGCTCCTTGGTATTCCGAGGAGCATGCCTGTTTGAGTGTCAATT  
AAATTCTCAACTCTCTTATAC-TTTTTGTAAAAGAGAGCTTGGACTGTGGAGGCTTGCT  
GGCCACTTTTTGGGGTCAGCTCCTCTGAAATGCATTAGCGGAACCGTTTGCGATCTGCCA  
CAAGTGTGATAAGTTATCTACACTGGCGAGGGGATTGCTCTCTGTAATGTTGAGCTTCTA  
ATTGTCTCTACTTTGTGAGACTACTTTTGAATGCTTGACCTCAAATCAGGTAGGACTACC  
CGCTGAACTTAA

>ABC2-17

TTTCCGTAGGTGAACCTGCGGAAGGATCATTATTGAATTATGTTTCTAGATAGGTTGTAG  
CTGGCTCTTTTAGAGCATGTGCACGCCTGTTTGGACTTCATTTTCATCCACCTGTGCACC  
TATTGTAGTCTTTGGTTGGGTTAGGAGGAAGTGATCATTGTATCAGCATCTGCTGGGAGT  
GAGGACTTGCAATTGTGAAAGCTTTGCTGTCTTGATGTGATCATGGAATCTTTTCTCAC  
TAGAGTCTATGTCACTCATTATACTCTGTGCAATGTCATTGAATGTCTTTACATGGGCTT  
GTATGCCTATGAAAATTGTAATACAACCTTTGAGCAACGGATCTCTTGGCTCTCGCATCGA  
TGAAGAACGCAGCGAAATGCGATAAGTAATGTGAATTGCAGAATTCAGTGAATCATCGAA  
TCTTTGAACGCATCTTGCGCTCCTTGGTATTCCGAGGAGCATGCCTGTTTGAGTGTCAATT  
AAATTCTCAACTCTCTTATAC-TTTTTGTAAAAGAGAGCTTGGACTGTGGAGGCTTGCT  
GGCCACTTTTTGGGGTCAGCTCCTCTGAAATGCATTAGCGGAACCGTTTGCGATCTGCCA  
CAAGTGTGATAAGTTATCTACACTGGCGAGGGGATTGCTCTCTGTAATGTTGAGCTTCTA  
ATTGTCTCTACTTTGTGAGACTACTTTTGAATGCTTGACCTCAAATCAGGTAGGACTACC  
CGCTGAACTTAA

>ABC2-19

TTTCCGTAGGTGAACCTGCGGAAGGATCATTATTGAATTATGTTTCTAGATAGGTTGTAG



CTGGCTCTTTTAGAGCATGTGCACGCCTGTTTGGACTTCATTTTCATCCACCTGTGCACC  
TATTGTAGTCTTTGGTTGGGTTAGGAGGAAGTGATCATTGTATCAGCATCTGCTGGGAGT  
GAGGACTTGCATTGTGAAAGCTTTGCTGTCCTTGATGTGATCATGGAATCTTTTCTCAC  
TAGAGTCTATGTCACCTATTATACTCTGTGCAATGTCATTGAATGTCTTTACATGGGCTT  
GTATGCCTATGAAAATTGTAATACAACCTTTCAGCAACGGATCTCTTGGCTCTCGCATCGA  
TGAAGAACGCAGCGAAATGCGATAAGTAATGTGAATTGCAGAATTCAGTGAATCATCGAA  
TCTTTGAACGCATCTTGCCTCCTTGGTATTCCGAGGAGCATGCCTGTTTGAGTGTCAAT  
AAATTCTCAACTCTCTTATAC-TTTTTTGTAAGAGAGCTTGGACTGTGGAGGCTTGCT  
GGCCACTTTTTGGGGTCAGCTCCTCTGAAATGCATTAGCGGAACCGTTTGCGATCTGCCA  
CAAGTGTGATAAGTTATCTACACTGGCGAGGGGATTGCTCTCTGTAATGTTTCACTTCTA  
ATTGTCTCTACTTTGTGAGACTACTTTTGAATGCTTGACCTCAAATCAGGTAGGACTACC  
CGCTGAACTTAA

>ABC2-21

TTTCCGTAGGTGAACCTGCGGAAGGATCATTATTGAATTATGTTTCTAGATAGGTTGTAG  
CTGGCTCTTTTAGAGCATGTGCACGCCTGTTTGGACTTCATTTTCATCCACCTGTGCACC  
TATTGTAGTCTTTGGTTGGGTTAGGAGGAAGTGATCATTGTATCAGCATCTGCTGGGAGT  
GAGGACTTGCATTGTGAAAGCTTTGCTGTCCTTGATGTGATCATGGAATCTTTTCTCAC  
TAGAGTCTATGTCACCTATTATACTCTGTGCAATGTCATTGAATGTCTTTACATGGGCTT  
GTATGCCTATGAAAATTGTAATACAACCTTTCAGCAACGGATCTCTTGGCTCTCGCATCGA  
TGAAGAACGCAGCGAAATGCGATAAGTAATGTGAATTGCAGAATTCAGTGAATCATCGAA  
TCTTTGAACGCATCTTGCCTCCTTGGTATTCCGAGGAGCATGCCTGTTTGAGTGTCAAT  
AAATTCTCAACTCTCTTATAC-TTTTTTGTAAGAGAGCTTGGACTGTGGAGGCTTGCT  
GGCCACTTTTTGGGGTCAGCTCCTCTGAAATGCATTAGCGGAACCGTTTGCGATCTGCCA  
CAAGTGTGATAAGTTATCTACACTGGCGAGGGGATTGCTCTCTGTAATGTTTCACTTCTA  
ATTGTCTCTACTTTGTGAGACTACTTTTGAATGCTTGACCTCAAATCAGGTAGGACTACC  
CGCTGAACTTAA

>ABC2-26

TTTCCGTAGGTGAACCTGCGGAAGGATCATTATTGAATTATGTTTCTAGATAGGTTGTAG  
CTGGCTCTTTTAGAGCATGTGCACGCCTGTTTGGACTTCATTTTCATCCACCTGTGCACC  
TATTGTAGTCTTTGGTTGGGTTAGGAGGAAGTGATCATTGTATCAGCATCTGCTGGGAGT  
GAGGACTTGCATTGTGAAAGCTTTGCTGTCCTTGATGTGATCATGGAATCTTTTCTCAC  
TAGAGTCTATGTCACCTATTATACTCTGTGCAATGTCATTGAATGTCTTTACATGGGCTT  
GTATGCCTATGAAAATTGTAATACAACCTTTCAGCAACGGATCTCTTGGCTCTCGCATCGA  
TGAAGAACGCAGCGAAATGCGATAAGTAATGTGAATTGCAGAATTCAGTGAATCATCGAA  
TCTTTGAACGCATCTTGCCTCCTTGGTATTCCGAGGAGCATGCCTGTTTGAGTGTCAAT  
AAATTCTCAACTCTCTTATAC-TTTTTTGTAAGAGAGCTTGGACTGTGGAGGCTTGCT  
GGCCACTTTTTGGGGTCAGCTCCTCTGAAATGCATTAGCGGAACCGTTTGCGATCTGCCA  
CAAGTGTGATAAGTTATCTACACTGGCGAGGGGATTGCTCTCTGTAATGTTTCACTTCTA  
ATTGTCTCTACTTTGTGAGACTACTTTTGAATGCTTGACCTCAAATCAGGTAGGACTACC  
CGCTGAACTTAA

>ABC2-31

TTTCCGTAGGTGAACCTGCGGAAGGATCATTATTGAATTATGTTTCTAGATAGGTTGTAG  
CTGGCTCTTTTAGAGCATGTGCACGCCTGTTTGGACTTCATTTTCATCCACCTGTGCACC  
TATTGTAGTCTTTGGTTGGGTTAGGAGGAAGTGATCATTGTATCAGCATCTGCTGGGAGT  
GAGGACTTGCATTGTGAAAGCTTTGCTGTCCTTGATGTGATCATGGAATCTTTTCTCAC  
TAGAGTCTATGTCACCTATTATACTCTGTGCAATGTCATTGAATGTCTTTACATGGGCTT  
GTATGCCTATGAAAATTGTAATACAACCTTTCAGCAACGGATCTCTTGGCTCTCGCATCGA  
TGAAGAACGCAGCGAAATGCGATAAGTAATGTGAATTGCAGAATTCAGTGAATCATCGAA  
TCTTTGAACGCATCTTGCCTCCTTGGTATTCCGAGGAGCATGCCTGTTTGAGTGTCAAT  
AAATTCTCAACTCTCTTATAC-TTTTTTGTAAGAGAGCTTGGACTGTGGAGGCTTGCT



GGCCACTTTTTGGGGTCAGCTCCTCTGAAATGCATTAGCGGAACCGTTTGCGATCTGCCA  
CAAGTGTGATAAGTTATCTACACTGGCGAGGGGATTGCTCTCTGTAATGTTGAGCTTCTA  
ATTGTCTCTACTTTGTGAGACTACTTTTGAATGCTTGACCTCAAATCAGGTAGGACTACC  
CGCTGAACTTAA

>ABC2-35

TTTCCGTAGGTGAACCTGCGGAAGGATCATTATTGAATTATGTTTCTAGATAGGTTGTAG  
CTGGCTCTTTTAGAGCATGTGCACGCCTGTTTGGACTTCATTTTCATCCACCTGTGCACC  
TATTGTAGTCTTTGGTTGGGTTAGGAGGAAGTGATCATTGTATCAGCATCTGCTGGGAGT  
GAGGACTTGCATTGTGAAAGCTTTGCTGTCCTTGATGTGATCATGGAATCTTTTCTCAC  
TAGAGTCTATGTCACTCATTATACTCTGTGCAATGTCATTGAATGTCTTTACATGGGCTT  
GTATGCCTATGAAAATTGTAATACTTTTTCAGCAACGGATCTCTTGGCTCTCGCATCGA  
TGAAGAACGCAGCGAAATGCGATAAGTAATGTGAATTGCAGAATTCAGTGAATCATCGAA  
TCTTTGAACGCATCTTGCGCTCCTTGGTATTCCGAGGAGCATGCCTGTTTGAGTGTGATT  
AAATTCTCAACTCTCTTATAC-TTTTTGTAAAAGAGAGCTTGGACTGTGGAGGCTTGCT  
GGCCACTTTTTGGGGTCAGCTCCTCTGAAATGCATTAGCGGAACCGTTTGCGATCTGCCA  
CAAGTGTGATAAGTTATCTACACTGGCGAGGGGATTGCTCTCTGTAATGTTGAGCTTCTA  
ATTGTCTCTACTTTGTGAGACTACTTTTGAATGCTTGACCTCAAATCAGGTAGGACTACC  
CGCTGAACTTAA

>ABC2-37

TTTCCGTAGGTGAACCTGCGGAAGGATCATTATTGAATTATGTTTCTAGATAGGTTGTAG  
CTGGCTCTTTTAGAGCATGTGCACGCCTGTTTGGACTTCATTTTCATCCACCTGTGCACC  
TATTGTAGTCTTTGGTTGGGTTAGGAGGAAGTGATCATTGTATCAGCATCTGCTGGGAGT  
GAGGACTTGCATTGTGAAAGCTTTGCTGTCCTTGATGTGATCATGGAATCTTTTCTCAC  
TAGAGTCTATGTCACTCATTATACTCTGTGCAATGTCATTGAATGTCTTTACATGGGCTT  
GTATGCCTATGAAAATTGTAATACTTTTTCAGCAACGGATCTCTTGGCTCTCGCATCGA  
TGAAGAACGCAGCGAAATGCGATAAGTAATGTGAATTGCAGAATTCAGTGAATCATCGAA  
TCTTTGAACGCATCTTGCGCTCCTTGGTATTCCGAGGAGCATGCCTGTTTGAGTGTGATT  
AAATTCTCAACTCTCTTATAC-TTTTTGTAAAAGAGAGCTTGGACTGTGGAGGCTTGCT  
GGCCACTTTTTGGGGTCAGCTCCTCTGAAATGCATTAGCGGAACCGTTTGCGATCTGCCA  
CAAGTGTGATAAGTTATCTACACTGGCGAGGGGATTGCTCTCTGTAATGTTGAGCTTCTA  
ATTGTCTCTACTTTGTGAGACTACTTTTGAATGCTTGACCTCAAATCAGGTAGGACTACC  
CGCTGAACTTAA

>ABC2-40

TTTCCGTAGGTGAACCTGCGGAAGGATCATTATTGAATTATGTTTCTAGATAGGTTGTAG  
CTGGCTCTTTTAGAGCATGTGCACGCCTGTTTGGACTTCATTTTCATCCACCTGTGCACC  
TATTGTAGTCTTTGGTTGGGTTAGGAGGAAGTGATCATTGTATCAGCATCTGCTGGGAGT  
GAGGACTTGCATTGTGAAAGCTTTGCTGTCCTTGATGTGATCATGGAATCTTTTCTCAC  
TAGAGTCTATGTCACTCATTATACTCTGTGCAATGTCATTGAATGTCTTTACATGGGCTT  
GTATGCCTATGAAAATTGTAATACTTTTTCAGCAACGGATCTCTTGGCTCTCGCATCGA  
TGAAGAACGCAGCGAAATGCGATAAGTAATGTGAATTGCAGAATTCAGTGAATCATCGAA  
TCTTTGAACGCATCTTGCGCTCCTTGGTATTCCGAGGAGCATGCCTGTTTGAGTGTGATT  
AAATTCTCAACTCTCTTATAC-TTTTTGTAAAAGAGAGCTTGGACTGTGGAGGCTTGCT  
GGCCACTTTTTGGGGTCAGCTCCTCTGAAATGCATTAGCGGAACCGTTTGCGATCTGCCA  
CAAGTGTGATAAGTTATCTACACTGGCGAGGGGATTGCTCTCTGTAATGTTGAGCTTCTA  
ATTGTCTCTACTTTGTGAGACTACTTTTGAATGCTTGACCTCAAATCAGGTAGGACTACC  
CGCTGAACTTAA

>ABC2-45

TTTCCGTAGGTGAACCTGCGGAAGGATCATTATTGAATTATGTTTCTAGATAGGTTGTAG  
CTGGCTCTTTTAGAGCATGTGCACGCCTGTTTGGACTTCATTTTCATCCACCTGTGCACC  
TATTGTAGTCTTTGGTTGGGTTAGGAGGAAGTGATCATTGTATCAGCATCTGCTGGGAGT



GAGGACTTGCATTGTGAAAGCTTTGCTGTCCTTGATGTGATCATGGAATCTTTTTCTCAC  
TAGAGTCTATGTCACCTATTATACTCTGTGCAATGTCATTGAATGTCTTTACATGGGCTT  
GTATGCCTATGAAAATTGTAATACAACCTTTAGCAACGGATCTCTTGGCTCTCGCATCGA  
TGAAGAACGCAGCGAAATGCGATAAGTAATGTGAATTGCAGAATTCAGTGAATCATCGAA  
TCTTTGAACGCATCTTGCGCTCCTTGGTATTCCGAGGAGCATGCCTGTTTGAGTGTGATT  
AAATTCTCAACTCTCTTATAC-TTTTTGTAAAAGAGAGCTTGGACTGTGGAGGCTTGCT  
GGCCACTTTTTGGGGTCAGCTCCTCTGAAATGCATTAGCGGAACCGTTTGCGATCTGCCA  
CAAGTGTGATAAGTTATCTACACTGGCGAGGGGATTGCTCTCTGTAATGTTGAGCTTCTA  
ATTGTCTCTACTTTGTGAGACTACTTTTGAATGCTTGACCTCAAATCAGGTAGGACTACC  
CGCTGAACTTAA

>ABC2-48

TTTCCGTAGGTGAACCTGCGGAAGGATCATTATTGAATTATGTTTCTAGATAGGTTGTAG  
CTGGCTCTTTTAGAGCATGTGCACGCCTGTTTGGACTTCATTTTCATCCACCTGTGCACC  
TATTGTAGTCTTTGGTTGGGTTAGGAGGAAGTGATCATTGTATCAGCATCTGCTGGGAGT  
GAGGACTTGCATTGTGAAAGCTTTGCTGTCCTTGATGTGATCATGGAATCTTTTTCTCAC  
TAGAGTCTATGTCACCTATTATACTCTGTGCAATGTCATTGAATGTCTTTACATGGGCTT  
GTATGCCTATGAAAATTGTAATACAACCTTTAGCAACGGATCTCTTGGCTCTCGCATCGA  
TGAAGAACGCAGCGAAATGCGATAAGTAATGTGAATTGCAGAATTCAGTGAATCATCGAA  
TCTTTGAACGCATCTTGCGCTCCTTGGTATTCCGAGGAGCATGCCTGTTTGAGTGTGATT  
AAATTCTCAACTCTCTTATAC-TTTTTGTAAAAGAGAGCTTGGACTGTGGAGGCTTGCT  
GGCCACTTTTTGGGGTCAGCTCCTCTGAAATGCATTAGCGGAACCGTTTGCGATCTGCCA  
CAAGTGTGATAAGTTATCTACACTGGCGAGGGGATTGCTCTCTGTAATGTTGAGCTTCTA  
ATTGTCTCTACTTTGTGAGACTACTTTTGAATGCTTGACCTCAAATCAGGTAGGACTACC  
CGCTGAACTTAA

>ABC2-50

TTTCCGTAGGTGAACCTGCGGAAGGATCATTATTGAATTATGTTTCTAGATAGGTTGTAG  
CTGGCTCTTTTAGAGCATGTGCACGCCTGTTTGGACTTCATTTTCATCCACCTGTGCACC  
TATTGTAGTCTTTGGTTGGGTTAGGAGGAAGTGATCATTGTATCAGCATCTGCTGGGAGT  
GAGGACTTGCATTGTGAAAGCTTTGCTGTCCTTGATGTGATCATGGAATCTTTTTCTCAC  
TAGAGTCTATGTCACCTATTATACTCTGTGCAATGTCATTGAATGTCTTTACATGGGCTT  
GTATGCCTATGAAAATTGTAATACAACCTTTAGCAACGGATCTCTTGGCTCTCGCATCGA  
TGAAGAACGCAGCGAAATGCGATAAGTAATGTGAATTGCAGAATTCAGTGAATCATCGAA  
TCTTTGAACGCATCTTGCGCTCCTTGGTATTCCGAGGAGCATGCCTGTTTGAGTGTGATT  
AAATTCTCAACTCTCTTATAC-TTTTTGTAAAAGAGAGCTTGGACTGTGGAGGCTTGCT  
GGCCACTTTTTGGGGTCAGCTCCTCTGAAATGCATTAGCGGAACCGTTTGCGATCTGCCA  
CAAGTGTGATAAGTTATCTACACTGGCGAGGGGATTGCTCTCTGTAATGTTGAGCTTCTA  
ATTGTCTCTACTTTGTGAGACTACTTTTGAATGCTTGACCTCAAATCAGGTAGGACTACC  
CGCTGAACTTAA

>ABC2-69

TTTCCGTAGGTGAACCTGCGGAAGGATCATTATTGAATTATGTTTCTAGATAGGTTGTAG  
CTGGCTCTTTTAGAGCATGTGCACGCCTGTTTGGACTTCATTTTCATCCACCTGTGCACC  
TATTGTAGTCTTTGGTTGGGTTAGGAGGAAGTGATCATTGTATCAGCATCTGCTGGGAGT  
GAGGACTTGCATTGTGAAAGCTTTGCTGTCCTTGATGTGATCATGGAATCTTTTTCTCAC  
TAGAGTCTATGTCACCTATTATACTCTGTGCAATGTCATTGAATGTCTTTACATGGGCTT  
GTATGCCTATGAAAATTGTAATACAACCTTTAGCAACGGATCTCTTGGCTCTCGCATCGA  
TGAAGAACGCAGCGAAATGCGATAAGTAATGTGAATTGCAGAATTCAGTGAATCATCGAA  
TCTTTGAACGCATCTTGCGCTCCTTGGTATTCCGAGGAGCATGCCTGTTTGAGTGTGATT  
AAATTCTCAACTCTCTTATAC-TTTTTGTAAAAGAGAGCTTGGACTGTGGAGGCTTGCT  
GGCCACTTTTTGGGGTCAGCTCCTCTGAAATGCATTAGCGGAACCGTTTGCGATCTGCCA  
CAAGTGTGATAAGTTATCTACACTGGCGAGGGGATTGCTCTCTGTAATGTTGAGCTTCTA



ATTGTCTCTACTTTGTGAGACTACTTTTGAATGCTTGACCTCAAATCAGGTAGGACTACC  
CGCTGAACTTAA

>ABC2-71

TTTCCGTAGGTGAACCTGCGGAAGGATCATTATTGAATTATGTTTCTAGATAGGTTGTAG  
CTGGCTCTTTTAGAGCATGTGCACGCCTGTTTGGACTTCATTTTCATCCACCTGTGCACC  
TATTGTAGTCTTTGGTTGGGTTAGGAGGAAGTGATCATTGTATCAGCATCTGCTGGGAGT  
GAGGACTTGCATTGTGAAAGCTTTGCTGTCCTTGATGTGATCATGGAATCTTTTTCTCAC  
TAGAGTCTATGTCACTCATTATACTCTGTGCAATGTCATTGAATGTCTTTACATGGGCTT  
GTATGCCTATGAAAATTGTAATAACAACCTTTCAGCAACGGATCTCTTGGCTCTCGCATCGA  
TGAAGAACGCAGCGAAATGCGATAAGTAATGTGAATTGCAGAATTCAGTGAATCATCGAA  
TCTTTGAACGCATCTTGCCTCCTTGGTATTCCGAGGAGCATGCCTGTTTGAGTGTCAAT  
AAATTCTCAACTCTCTTATAC-TTTTTGTAAAAGAGAGCTTGGACTGTGGAGGCTTGCT  
GGCCACTTTTTGGGGTCAGCTCCTCTGAAATGCATTAGCGGAACCGTTTGCGATCTGCCA  
CAAGTGTGATAAGTTATCTACACTGGCGAGGGGATTGCTCTCTGTAATGTTTCAGCTTCTA  
ATTGTCTCTACTTTGTGAGACTACTTTTGAATGCTTGACCTCAAATCAGGTAGGACTACC  
CGCTGAACTTAA

>ABC3-3

TTTCCGTAGGTGAACCTGCGGAAGGATCATTATTGAATTATGTTTCTAGATAGGTTGTAG  
CTGGCTCTTTTAGAGCATGTGCACGCCTGTTTGGACTTCATTTTCATCCACCTGTGCACC  
TATTGTAGTCTTTGGTTGGGTTAGGAGGAAGTGATCATTGTATCAGCATCTGCTGGGAGT  
GAGGACTTGCATTGTGAAAGCTTTGCTGTCCTTGATGTGATCATGGAATCTTTTTCTCAC  
TAGAGTCTATGTCACTCATTATACTCTGTGCAATGTCATTGAATGTCTTTACATGGGCTT  
GTATGCCTATGAAAATTGTAATAACAACCTTTCAGCAACGGATCTCTTGGCTCTCGCATCGA  
TGAAGAACGCAGCGAAATGCGATAAGTAATGTGAATTGCAGAATTCAGTGAATCATCGAA  
TCTTTGAACGCATCTTGCCTCCTTGGTATTCCGAGGAGCATGCCTGTTTGAGTGTCAAT  
AAATTCTCAACTCTCTTATAC-TTTTTGTAAAAGAGAGCTTGGACTGTGGAGGCTTGCT  
GGCCACTTTTTGGGGTCAGCTCCTCTGAAATGCATTAGCGGAACCGTTTGCGATCTGCCA  
CAAGTGTGATAAGTTATCTACACTGGCGAGGGGATTGCTCTCTGTAATGTTTCAGCTTCTA  
ATTGTCTCTACTTTGTGAGACTACTTTTGAATGCTTGACCTCAAATCAGGTAGGACTACC  
CGCTGAACTTAA

>ABC3-10

TTTCCGTAGGTGAACCTGCGGAAGGATCATTATTGAATTATGTTTCTAGATAGGTTGTAG  
CTGGCTCTTTTAGAGCATGTGCACGCCTGTTTGGACTTCATTTTCATCCACCTGTGCACC  
TATTGTAGTCTTTGGTTGGGTTAGGAGGAAGTGATCATTGTATCAGCATCTGCTGGGAGT  
GAGGACTTGCATTGTGAAAGCTTTGCTGTCCTTGATGTGATCATGGAATCTTTTTCTCAC  
TAGAGTCTATGTCACTCATTATACTCTGTGCAATGTCATTGAATGTCTTTACATGGGCTT  
GTATGCCTATGAAAATTGTAATAACAACCTTTCAGCAACGGATCTCTTGGCTCTCGCATCGA  
TGAAGAACGCAGCGAAATGCGATAAGTAATGTGAATTGCAGAATTCAGTGAATCATCGAA  
TCTTTGAACGCATCTTGCCTCCTTGGTATTCCGAGGAGCATGCCTGTTTGAGTGTCAAT  
AAATTCTCAACTCTCTTATAC-TTTTTGTAAAAGAGAGCTTGGACTGTGGAGGCTTGCT  
GGCCACTTTTTGGGGTCAGCTCCTCTGAAATGCATTAGCGGAACCGTTTGCGATCTGCCA  
CAAGTGTGATAAGTTATCTACACTGGCGAGGGGATTGCTCTCTGTAATGTTTCAGCTTCTA  
ATTGTCTCTACTTTGTGAGACTACTTTTGAATGCTTGACCTCAAATCAGGTAGGACTACC  
CGCTGAACTTAA

>ABC3-11

TTTCCGTAGGTGAACCTGCGGAAGGATCATTATTGAATTATGTTTCTAGATAGGTTGTAG  
CTGGCTCTTTTAGAGCATGTGCACGCCTGTTTGGACTTCATTTTCATCCACCTGTGCACC  
TATTGTAGTCTTTGGTTGGGTTAGGAGGAAGTGATCATTGTATCAGCATCTGCTGGGAGT  
GAGGACTTGCATTGTGAAAGCTTTGCTGTCCTTGATGTGATCATGGAATCTTTTTCTCAC  
TAGAGTCTATGTCACTCATTATACTCTGTGCAATGTCATTGAATGTCTTTACATGGGCTT



GTATGCCTATGAAAATTGTAATACAACCTTTTCAGCAACGGATCTCTTGGCTCTCGCATCGA  
TGAAGAACGCAGCGAAATGCGATAAGTAATGTGAATTGCAGAATTCAGTGAATCATCGAA  
TCTTTGAACGCATCTTGCCTCCTTGGTATTCCGAGGAGCATGCCTGTTTGAGTGTCAAT  
AAATTCTCAACTCTCTTATAC-TTTTTTGAAAAGAGAGCTTGGACTGTGGAGGCTTGCT  
GGCCACTTTTTGGGGTCAGCTCCTCTGAAATGCATTAGCGGAACCGTTTGCGATCTGCCA  
CAAGTGTGATAAGTTATCTACACTGGCGAGGGGATTGCTCTCTGTAATGTTTCAGCTTCTA  
ATTGTCTCTACTTTGTGAGACTACTTTTGAATGCTTGACCTCAAATCAGGTAGGACTACC  
CGCTGAACTTAA

>ABC3-12

TTTCCGTAGGTGAACCTGCGGAAGGATCATTATTGAATTATGTTTCTAGATAGGTTGTAG  
CTGGCTCTTTTAGAGCATGTGCACGCCTGTTTGGACTTCATTTTCATCCACCTGTGCACC  
TATTGTAGTCTTTGGTTGGGTTAGGAGGAAGTGATCATTGTATCAGCATCTGCTGGGAGT  
GAGGACTTGCATTGTGAAAGCTTTGCTGTCCTTGATGTGATCATGGAATCTTTTCTCAC  
TAGAGTCTATGTCACCTCATTATACTCTGTCTGAATGTCATTGAATGTCTTTACATGGGCTT  
GTATGCCTATGAAAATTGTAATACAACCTTTTCAGCAACGGATCTCTTGGCTCTCGCATCGA  
TGAAGAACGCAGCGAAATGCGATAAGTAATGTGAATTGCAGAATTCAGTGAATCATCGAA  
TCTTTGAACGCATCTTGCCTCCTTGGTATTCCGAGGAGCATGCCTGTTTGAGTGTCAAT  
AAATTCTCAACTCTCTTATAC-TTTTTTGAAAAGAGAGCTTGGACTGTGGAGGCTTGCT  
GGCCACTTTTTGGGGTCAGCTCCTCTGAAATGCATTAGCGGAACCGTTTGCGATCTGCCA  
CAAGTGTGATAAGTTATCTACACTGGCGAGGGGATTGCTCTCTGTAATGTTTCAGCTTCTA  
ATTGTCTCTACTTTGTGAGACTACTTTTGAATGCTTGACCTCAAATCAGGTAGGACTACC  
CGCTGAACTTAA

>ABC3-17

TTTCCGTAGGTGAACCTGCGGAAGGATCATTATTGAATTATGTTTCTAGATAGGTTGTAG  
CTGGCTCTTTTAGAGCATGTGCACGCCTGTTTGGACTTCATTTTCATCCACCTGTGCACC  
TATTGTAGTCTTTGGTTGGGTTAGGAGGAAGTGATCATTGTATCAGCATCTGCTGGGAGT  
GAGGACTTGCATTGTGAAAGCTTTGCTGTCCTTGATGTGATCATGGAATCTTTTCTCAC  
TAGAGTCTATGTCACCTCATTATACTCTGTCTGAATGTCATTGAATGTCTTTACATGGGCTT  
GTATGCCTATGAAAATTGTAATACAACCTTTTCAGCAACGGATCTCTTGGCTCTCGCATCGA  
TGAAGAACGCAGCGAAATGCGATAAGTAATGTGAATTGCAGAATTCAGTGAATCATCGAA  
TCTTTGAACGCATCTTGCCTCCTTGGTATTCCGAGGAGCATGCCTGTTTGAGTGTCAAT  
AAATTCTCAACTCTCTTATAC-TTTTTTGAAAAGAGAGCTTGGACTGTGGAGGCTTGCT  
GGCCACTTTTTGGGGTCAGCTCCTCTGAAATGCATTAGCGGAACCGTTTGCGATCTGCCA  
CAAGTGTGATAAGTTATCTACACTGGCGAGGGGATTGCTCTCTGTAATGTTTCAGCTTCTA  
ATTGTCTCTACTTTGTGAGACTACTTTTGAATGCTTGACCTCAAATCAGGTAGGACTACC  
CGCTGAACTTAA

>ABC3-21

TTTCCGTAGGTGAACCTGCGGAAGGATCATTATTGAATTATGTTTCTAGATAGGTTGTAG  
CTGGCTCTTTTAGAGCATGTGCACGCCTGTTTGGACTTCATTTTCATCCACCTGTGCACC  
TATTGTAGTCTTTGGTTGGGTTAGGAGGAAGTGATCATTGTATCAGCATCTGCTGGGAGT  
GAGGACTTGCATTGTGAAAGCTTTGCTGTCCTTGATGTGATCATGGAATCTTTTCTCAC  
TAGAGTCTATGTCACCTCATTATACTCTGTCTGAATGTCATTGAATGTCTTTACATGGGCTT  
GTATGCCTATGAAAATTGTAATACAACCTTTTCAGCAACGGATCTCTTGGCTCTCGCATCGA  
TGAAGAACGCAGCGAAATGCGATAAGTAATGTGAATTGCAGAATTCAGTGAATCATCGAA  
TCTTTGAACGCATCTTGCCTCCTTGGTATTCCGAGGAGCATGCCTGTTTGAGTGTCAAT  
AAATTCTCAACTCTCTTATAC-TTTTTTGAAAAGAGAGCTTGGACTGTGGAGGCTTGCT  
GGCCACTTTTTGGGGTCAGCTCCTCTGAAATGCATTAGCGGAACCGTTTGCGATCTGCCA  
CAAGTGTGATAAGTTATCTACACTGGCGAGGGGATTGCTCTCTGTAATGTTTCAGCTTCTA  
ATTGTCTCTACTTTGTGAGACTACTTTTGAATGCTTGACCTCAAATCAGGTAGGACTACC  
CGCTGAACTTAA



>ABC3-26

TTTCCGTAGGTGAACCTGCGGAAGGATCATTATTGAATTATGTTTCTAGATAGGTTGTAG  
CTGGCTCTTTTAGAGCATGTGCACGCCTGTTTGGACTTCATTTTCATCCACCTGTGCACC  
TATTGTAGTCTTTGGTTGGGTTAGGAGGAAGTGATCATTGTATCAGCATCTGCTGGGAGT  
GAGGACTTGCATTGTGAAAGCTTTGCTGTCCTTGATGTGATCATGGAATCTTTTTCTCAC  
TAGAGTCTATGTCACCTCATTATACTCTGTGCGAATGTCATTGAATGTCTTTACATGGGCTT  
GTATGCCTATGAAAATTGTAATACAACCTTTCAGCAACGGATCTCTTGGCTCTCGCATCGA  
TGAAGAACGCAGCGAAATGCGATAAGTAATGTGAATTGCAGAATTCAGTGAATCATCGAA  
TCTTTGAACGCATCTTGCCTCCTTGGTATTCCGAGGAGCATGCCTGTTTGAGTGTCTATT  
AAATTCTCAACTCTCTTATAC-TTTTTGTAAAAGAGAGCTTGGACTGTGGAGGCTTGCT  
GGCCACTTTTTGGGGTCAGCTCCTCTGAAATGCATTAGCGGAACCGTTTGCGATCTGCCA  
CAAGTGTGATAAGTTATCTACACTGGCGAGGGGATTGCTCTCTGTAATGTTTCAGCTTCTA  
ATTGTCTCTACTTTGTGAGACTACTTTTGAATGCTTGACCTCAAATCAGGTAGGACTACC  
CGCTGAACTTAA

>ABC3-28

TTTCCGTAGGTGAACCTGCGGAAGGATCATTATTGAATTATGTTTCTAGATAGGTTGTAG  
CTGGCTCTTTTAGAGCATGTGCACGCCTGTTTGGACTTCATTTTCATCCACCTGTGCACC  
TATTGTAGTCTTTGGTTGGGTTAGGAGGAAGTGATCATTGTATCAGCATCTGCTGGGAGT  
GAGGACTTGCATTGTGAAAGCTTTGCTGTCCTTGATGTGATCATGGAATCTTTTTCTCAC  
TAGAGTCTATGTCACCTCATTATACTCTGTGCGAATGTCATTGAATGTCTTTACATGGGCTT  
GTATGCCTATGAAAATTGTAATACAACCTTTCAGCAACGGATCTCTTGGCTCTCGCATCGA  
TGAAGAACGCAGCGAAATGCGATAAGTAATGTGAATTGCAGAATTCAGTGAATCATCGAA  
TCTTTGAACGCATCTTGCCTCCTTGGTATTCCGAGGAGCATGCCTGTTTGAGTGTCTATT  
AAATTCTCAACTCTCTTATAC-TTTTTGTAAAAGAGAGCTTGGACTGTGGAGGCTTGCT  
GGCCACTTTTTGGGGTCAGCTCCTCTGAAATGCATTAGCGGAACCGTTTGCGATCTGCCA  
CAAGTGTGATAAGTTATCTACACTGGCGAGGGGATTGCTCTCTGTAATGTTTCAGCTTCTA  
ATTGTCTCTACTTTGTGAGACTACTTTTGAATGCTTGACCTCAAATCAGGTAGGACTACC  
CGCTGAACTTAA

>ABC3-29

TTTCCGTAGGTGAACCTGCGGAAGGATCATTATTGAATTATGTTTCTAGATAGGTTGTAG  
CTGGCTCTTTTAGAGCATGTGCACGCCTGTTTGGACTTCATTTTCATCCACCTGTGCACC  
TATTGTAGTCTTTGGTTGGGTTAGGAGGAAGTGATCATTGTATCAGCATCTGCTGGGAGT  
GAGGACTTGCATTGTGAAAGCTTTGCTGTCCTTGATGTGATCATGGAATCTTTTTCTCAC  
TAGAGTCTATGTCACCTCATTATACTCTGTGCGAATGTCATTGAATGTCTTTACATGGGCTT  
GTATGCCTATGAAAATTGTAATACAACCTTTCAGCAACGGATCTCTTGGCTCTCGCATCGA  
TGAAGAACGCAGCGAAATGCGATAAGTAATGTGAATTGCAGAATTCAGTGAATCATCGAA  
TCTTTGAACGCATCTTGCCTCCTTGGTATTCCGAGGAGCATGCCTGTTTGAGTGTCTATT  
AAATTCTCAACTCTCTTATAC-TTTTTGTAAAAGAGAGCTTGGACTGTGGAGGCTTGCT  
GGCCACTTTTTGGGGTCAGCTCCTCTGAAATGCATTAGCGGAACCGTTTGCGATCTGCCA  
CAAGTGTGATAAGTTATCTACACTGGCGAGGGGATTGCTCTCTGTAATGTTTCAGCTTCTA  
ATTGTCTCTACTTTGTGAGACTACTTTTGAATGCTTGACCTCAAATCAGGTAGGACTACC  
CGCTGAACTTAA

>ABC3-36

TTTCCGTAGGTGAACCTGCGGAAGGATCATTATTGAATTATGTTTCTAGATAGGTTGTAG  
CTGGCTCTTTTAGAGCATGTGCACGCCTGTTTGGACTTCATTTTCATCCACCTGTGCACC  
TATTGTAGTCTTTGGTTGGGTTAGGAGGAAGTGATCATTGTATCAGCATCTGCTGGGAGT  
GAGGACTTGCATTGTGAAAGCTTTGCTGTCCTTGATGTGATCATGGAATCTTTTTCTCAC  
TAGAGTCTATGTCACCTCATTATACTCTGTGCGAATGTCATTGAATGTCTTTACATGGGCTT  
GTATGCCTATGAAAATTGTAATACAACCTTTCAGCAACGGATCTCTTGGCTCTCGCATCGA  
TGAAGAACGCAGCGAAATGCGATAAGTAATGTGAATTGCAGAATTCAGTGAATCATCGAA



TCTTTGAACGCATCTTGCGCTCCTTGGTATTCCGAGGAGCATGCCTGTTTGAGTGTCAATT  
AAATTCTCAACTCTCTTATAC-TTTTTGTAAAAGAGAGCTTGGACTGTGGAGGCTTGCT  
GGCCACTTTTTGGGGTCAGCTCCTCTGAAATGCATTAGCGGAACCGTTTGCGATCTGCCA  
CAAGTGTGATAAGTTATCTACACTGGCGAGGGGATTGCTCTCTGTAATGTTTCACTTCTA  
ATTGTCTCTACTTTGTGAGACTACTTTTGAATGCTTGACCTCAAATCAGGTAGGACTACC  
CGCTGAACTTAA

>ABC3-44

TTTCCGTAGGTGAACCTGCGGAAGGATCATTATTGAATTATGTTTCTAGATAGGTTGTAG  
CTGGCTCTTTTAGAGCATGTGCACGCCTGTTTGGACTTCATTTTCATCCACCTGTGCACC  
TATTGTAGTCTTTGGTTGGGTTAGGAGGAAGTGATCATTGTATCAGCATCTGCTGGGAGT  
GAGGACTTGCAATTGTGAAAGCTTTGCTGTCTTGATGTGATCATGGAATCTTTTCTCAC  
TAGAGTCTATGTCACTCATTATACTCTGTGCAATGTCATTGAATGTCTTTACATGGGCTT  
GTATGCCTATGAAAATTGTAATACAACCTTTAGCAACGGATCTCTTGGCTCTCGCATCGA  
TGAAGAACGCAGCGAAATGCGATAAGTAATGTGAATTGCAGAATTCAGTGAATCATCGAA  
TCTTTGAACGCATCTTGCGCTCCTTGGTATTCCGAGGAGCATGCCTGTTTGAGTGTCAATT  
AAATTCTCAACTCTCTTATAC-TTTTTGTAAAAGAGAGCTTGGACTGTGGAGGCTTGCT  
GGCCACTTTTTGGGGTCAGCTCCTCTGAAATGCATTAGCGGAACCGTTTGCGATCTGCCA  
CAAGTGTGATAAGTTATCTACACTGGCGAGGGGATTGCTCTCTGTAATGTTTCACTTCTA  
ATTGTCTCTACTTTGTGAGACTACTTTTGAATGCTTGACCTCAAATCAGGTAGGACTACC  
CGCTGAACTTAA

>ABC3-52

TTTCCGTAGGTGAACCTGCGGAAGGATCATTATTGAATTATGTTTCTAGATAGGTTGTAG  
CTGGCTCTTTTAGAGCATGTGCACGCCTGTTTGGACTTCATTTTCATCCACCTGTGCACC  
TATTGTAGTCTTTGGTTGGGTTAGGAGGAAGTGATCATTGTATCAGCATCTGCTGGGAGT  
GAGGACTTGCAATTGTGAAAGCTTTGCTGTCTTGATGTGATCATGGAATCTTTTCTCAC  
TAGAGTCTATGTCACTCATTATACTCTGTGCAATGTCATTGAATGTCTTTACATGGGCTT  
GTATGCCTATGAAAATTGTAATACAACCTTTAGCAACGGATCTCTTGGCTCTCGCATCGA  
TGAAGAACGCAGCGAAATGCGATAAGTAATGTGAATTGCAGAATTCAGTGAATCATCGAA  
TCTTTGAACGCATCTTGCGCTCCTTGGTATTCCGAGGAGCATGCCTGTTTGAGTGTCAATT  
AAATTCTCAACTCTCTTATAC-TTTTTGTAAAAGAGAGCTTGGACTGTGGAGGCTTGCT  
GGCCACTTTTTGGGGTCAGCTCCTCTGAAATGCATTAGCGGAACCGTTTGCGATCTGCCA  
CAAGTGTGATAAGTTATCTACACTGGCGAGGGGATTGCTCTCTGTAATGTTTCACTTCTA  
ATTGTCTCTACTTTGTGAGACTACTTTTGAATGCTTGACCTCAAATCAGGTAGGACTACC  
CGCTGAACTTAA

>ABC4-6

TTTCCGTAGGTGAACCTGCGGAAGGATCATTATTGAATTATGTTTCTAGATAGGTTGTAG  
CTGGCTCTTTTAGAGCATGTGCACGCCTGTTTGGACTTCATTTTCATCCACCTGTGCACC  
TATTGTAGTCTTTGGTTGGGTTAGGAGGAAGTGATCATTGTATCAGCATCTGCTGGGAGT  
GAGGACTTGCAATTGTGAAAGCTTTGCTGTCTTGATGTGATCATGGAATCTTTTCTCAC  
TAGAGTCTATGTCACTCATTATACTCTGTGCAATGTCATTGAATGTCTTTACATGGGCTT  
GTATGCCTATGAAAATTGTAATACAACCTTTAGCAACGGATCTCTTGGCTCTCGCATCGA  
TGAAGAACGCAGCGAAATGCGATAAGTAATGTGAATTGCAGAATTCAGTGAATCATCGAA  
TCTTTGAACGCATCTTGCGCTCCTTGGTATTCCGAGGAGCATGCCTGTTTGAGTGTCAATT  
AAATTCTCAACTCTCTTATAC-TTTTTGTAAAAGAGAGCTTGGACTGTGGAGGCTTGCT  
GGCCACTTTTTGGGGTCAGCTCCTCTGAAATGCATTAGCGGAACCGTTTGCGATCTGCCA  
CAAGTGTGATAAGTTATCTACACTGGCGAGGGGATTGCTCTCTGTAATGTTTCACTTCTA  
ATTGTCTCTACTTTGTGAGACTACTTTTGAATGCTTGACCTCAAATCAGGTAGGACTACC  
CGCTGAACTTAA

>ABC4-7

TTTCCGTAGGTGAACCTGCGGAAGGATCATTATTGAATTATGTTTCTAGATAGGTTGTAG



CTGGCTCTTTTAGAGCATGTGCACGCCTGTTTGGACTTCATTTTCATCCACCTGTGCACC  
TATTGTAGTCTTTGGTTGGGTTAGGAGGAAGTGATCATTGTATCAGCATCTGCTGGGAGT  
GAGGACTTGCATTGTGAAAGCTTTGCTGTCCTTGATGTGATCATGGAATCTTTTCTCAC  
TAGAGTCTATGTCACCTATTATACTCTGTGCAATGTCATTGAATGTCTTTACATGGGCTT  
GTATGCCTATGAAAATTGTAATACAACCTTTCAGCAACGGATCTCTTGGCTCTCGCATCGA  
TGAAGAACGCAGCGAAATGCGATAAGTAATGTGAATTGCAGAATTCAGTGAATCATCGAA  
TCTTTGAACGCATCTTGCCTCCTTGGTATTCCGAGGAGCATGCCTGTTTGAGTGTCAAT  
AAATTCTCAACTCTCTTATAC-TTTTTTGTAAGAGAGCTTGGACTGTGGAGGCTTGCT  
GGCCACTTTTTGGGGTCAGCTCCTCTGAAATGCATTAGCGGAACCGTTTGCGATCTGCCA  
CAAGTGTGATAAGTTATCTACACTGGCGAGGGGATTGCTCTCTGTAATGTTTCAGCTTCTA  
ATTGTCTCTACTTTGTGAGACTACTTTTGAATGCTTGACCTCAAATCAGGTAGGACTACC  
CGCTGAACTTAA

>ABC4-8

TTTCCGTAGGTGAACCTGCGGAAGGATCATTATTGAATTATGTTTCTAGATAGGTTGTAG  
CTGGCTCTTTTAGAGCATGTGCACGCCTGTTTGGACTTCATTTTCATCCACCTGTGCACC  
TATTGTAGTCTTTGGTTGGGTTAGGAGGAAGTGATCATTGTATCAGCATCTGCTGGGAGT  
GAGGACTTGCATTGTGAAAGCTTTGCTGTCCTTGATGTGATCATGGAATCTTTTCTCAC  
TAGAGTCTATGTCACCTATTATACTCTGTGCAATGTCATTGAATGTCTTTACATGGGCTT  
GTATGCCTATGAAAATTGTAATACAACCTTTCAGCAACGGATCTCTTGGCTCTCGCATCGA  
TGAAGAACGCAGCGAAATGCGATAAGTAATGTGAATTGCAGAATTCAGTGAATCATCGAA  
TCTTTGAACGCATCTTGCCTCCTTGGTATTCCGAGGAGCATGCCTGTTTGAGTGTCAAT  
AAATTCTCAACTCTCTTATAC-TTTTTTGTAAGAGAGCTTGGACTGTGGAGGCTTGCT  
GGCCACTTTTTGGGGTCAGCTCCTCTGAAATGCATTAGCGGAACCGTTTGCGATCTGCCA  
CAAGTGTGATAAGTTATCTACACTGGCGAGGGGATTGCTCTCTGTAATGTTTCAGCTTCTA  
ATTGTCTCTACTTTGTGAGACTACTTTTGAATGCTTGACCTCAAATCAGGTAGGACTACC  
CGCTGAACTTAA

>ABC4-11

TTTCCGTAGGTGAACCTGCGGAAGGATCATTATTGAATTATGTTTCTAGATAGGTTGTAG  
CTGGCTCTTTTAGAGCATGTGCACGCCTGTTTGGACTTCATTTTCATCCACCTGTGCACC  
TATTGTAGTCTTTGGTTGGGTTAGGAGGAAGTGATCATTGTATCAGCATCTGCTGGGAGT  
GAGGACTTGCATTGTGAAAGCTTTGCTGTCCTTGATGTGATCATGGAATCTTTTCTCAC  
TAGAGTCTATGTCACCTATTATACTCTGTGCAATGTCATTGAATGTCTTTACATGGGCTT  
GTATGCCTATGAAAATTGTAATACAACCTTTCAGCAACGGATCTCTTGGCTCTCGCATCGA  
TGAAGAACGCAGCGAAATGCGATAAGTAATGTGAATTGCAGAATTCAGTGAATCATCGAA  
TCTTTGAACGCATCTTGCCTCCTTGGTATTCCGAGGAGCATGCCTGTTTGAGTGTCAAT  
AAATTCTCAACTCTCTTATAC-TTTTTTGTAAGAGAGCTTGGACTGTGGAGGCTTGCT  
GGCCACTTTTTGGGGTCAGCTCCTCTGAAATGCATTAGCGGAACCGTTTGCGATCTGCCA  
CAAGTGTGATAAGTTATCTACACTGGCGAGGGGATTGCTCTCTGTAATGTTTCAGCTTCTA  
ATTGTCTCTACTTTGTGAGACTACTTTTGAATGCTTGACCTCAAATCAGGTAGGACTACC  
CGCTGAACTTAA

>ABC4-24

TTTCCGTAGGTGAACCTGCGGAAGGATCATTATTGAATTATGTTTCTAGATAGGTTGTAG  
CTGGCTCTTTTAGAGCATGTGCACGCCTGTTTGGACTTCATTTTCATCCACCTGTGCACC  
TATTGTAGTCTTTGGTTGGGTTAGGAGGAAGTGATCATTGTATCAGCATCTGCTGGGAGT  
GAGGACTTGCATTGTGAAAGCTTTGCTGTCCTTGATGTGATCATGGAATCTTTTCTCAC  
TAGAGTCTATGTCACCTATTATACTCTGTGCAATGTCATTGAATGTCTTTACATGGGCTT  
GTATGCCTATGAAAATTGTAATACAACCTTTCAGCAACGGATCTCTTGGCTCTCGCATCGA  
TGAAGAACGCAGCGAAATGCGATAAGTAATGTGAATTGCAGAATTCAGTGAATCATCGAA  
TCTTTGAACGCATCTTGCCTCCTTGGTATTCCGAGGAGCATGCCTGTTTGAGTGTCAAT  
AAATTCTCAACTCTCTTATAC-TTTTTTGTAAGAGAGCTTGGACTGTGGAGGCTTGCT



GGCCACTTTTTGGGGTCAGCTCCTCTGAAATGCATTAGCGGAACCGTTTGCGATCTGCCA  
CAAGTGTGATAAGTTATCTACACTGGCGAGGGGATTGCTCTCTGTAATGTTGAGCTTCTA  
ATTGTCTCTACTTTGTGAGACTACTTTTGAATGCTTGACCTCAAATCAGGTAGGACTACC  
CGCTGAACTTAA

>ABC4-37

TTTCCGTAGGTGAACCTGCGGAAGGATCATTATTGAATTATGTTTCTAGATAGGTTGTAG  
CTGGCTCTTTTAGAGCATGTGCACGCCTGTTTGGACTTCATTTTCATCCACCTGTGCACC  
TATTGTAGTCTTTGGTTGGGTTAGGAGGAAGTGATCATTGTATCAGCATCTGCTGGGAGT  
GAGGACTTGCATTGTGAAAGCTTTGCTGTCCTTGATGTGATCATGGAATCTTTTTCTCAC  
TAGAGTCTATGTCACTCATTATACTCTGTGCAATGTCATTGAATGTCTTTACATGGGCTT  
GTATGCCTATGAAAATTGTAATACTTTTTCAGCAACGGATCTCTTGGCTCTCGCATCGA  
TGAAGAACGCAGCGAAATGCGATAAGTAATGTGAATTGCAGAATTCAGTGAATCATCGAA  
TCTTTGAACGCATCTTGCGCTCCTTGGTATTCCGAGGAGCATGCCTGTTTGAGTGTGATT  
AAATTCTCAACTCTCTTATAC-TTTTTGTAAAAGAGAGCTTGGACTGTGGAGGCTTGCT  
GGCCACTTTTTGGGGTCAGCTCCTCTGAAATGCATTAGCGGAACCGTTTGCGATCTGCCA  
CAAGTGTGATAAGTTATCTACACTGGCGAGGGGATTGCTCTCTGTAATGTTGAGCTTCTA  
ATTGTCTCTACTTTGTGAGACTACTTTTGAATGCTTGACCTCAAATCAGGTAGGACTACC  
CGCTGAACTTAA

>ABC4-41

TTTCCGTAGGTGAACCTGCGGAAGGATCATTATTGAATTATGTTTCTAGATAGGTTGTAG  
CTGGCTCTTTTAGAGCATGTGCACGCCTGTTTGGACTTCATTTTCATCCACCTGTGCACC  
TATTGTAGTCTTTGGTTGGGTTAGGAGGAAGTGATCATTGTATCAGCATCTGCTGGGAGT  
GAGGACTTGCATTGTGAAAGCTTTGCTGTCCTTGATGTGATCATGGAATCTTTTTCTCAC  
TAGAGTCTATGTCACTCATTATACTCTGTGCAATGTCATTGAATGTCTTTACATGGGCTT  
GTATGCCTATGAAAATTGTAATACTTTTTCAGCAACGGATCTCTTGGCTCTCGCATCGA  
TGAAGAACGCAGCGAAATGCGATAAGTAATGTGAATTGCAGAATTCAGTGAATCATCGAA  
TCTTTGAACGCATCTTGCGCTCCTTGGTATTCCGAGGAGCATGCCTGTTTGAGTGTGATT  
AAATTCTCAACTCTCTTATAC-TTTTTGTAAAAGAGAGCTTGGACTGTGGAGGCTTGCT  
GGCCACTTTTTGGGGTCAGCTCCTCTGAAATGCATTAGCGGAACCGTTTGCGATCTGCCA  
CAAGTGTGATAAGTTATCTACACTGGCGAGGGGATTGCTCTCTGTAATGTTGAGCTTCTA  
ATTGTCTCTACTTTGTGAGACTACTTTTGAATGCTTGACCTCAAATCAGGTAGGACTACC  
CGCTGAACTTAA

>ABC4-45

TTTCCGTAGGTGAACCTGCGGAAGGATCATTATTGAATTATGTTTCTAGATAGGTTGTAG  
CTGGCTCTTTTAGAGCATGTGCACGCCTGTTTGGACTTCATTTTCATCCACCTGTGCACC  
TATTGTAGTCTTTGGTTGGGTTAGGAGGAAGTGATCATTGTATCAGCATCTGCTGGGAGT  
GAGGACTTGCATTGTGAAAGCTTTGCTGTCCTTGATGTGATCATGGAATCTTTTTCTCAC  
TAGAGTCTATGTCACTCATTATACTCTGTGCAATGTCATTGAATGTCTTTACATGGGCTT  
GTATGCCTATGAAAATTGTAATACTTTTTCAGCAACGGATCTCTTGGCTCTCGCATCGA  
TGAAGAACGCAGCGAAATGCGATAAGTAATGTGAATTGCAGAATTCAGTGAATCATCGAA  
TCTTTGAACGCATCTTGCGCTCCTTGGTATTCCGAGGAGCATGCCTGTTTGAGTGTGATT  
AAATTCTCAACTCTCTTATAC-TTTTTGTAAAAGAGAGCTTGGACTGTGGAGGCTTGCT  
GGCCACTTTTTGGGGTCAGCTCCTCTGAAATGCATTAGCGGAACCGTTTGCGATCTGCCA  
CAAGTGTGATAAGTTATCTACACTGGCGAGGGGATTGCTCTCTGTAATGTTGAGCTTCTA  
ATTGTCTCTACTTTGTGAGACTACTTTTGAATGCTTGACCTCAAATCAGGTAGGACTACC  
CGCTGAACTTAA

>ABC4-48

TTTCCGTAGGTGAACCTGCGGAAGGATCATTATTGAATTATGTTTCTAGATAGGTTGTAG  
CTGGCTCTTTTAGAGCATGTGCACGCCTGTTTGGACTTCATTTTCATCCACCTGTGCACC  
TATTGTAGTCTTTGGTTGGGTTAGGAGGAAGTGATCATTGTATCAGCATCTGCTGGGAGT



GAGGACTTGCATTGTGAAAGCTTTGCTGTCCTTGATGTGATCATGGAATCTTTTTCTCAC  
TAGAGTCTATGTCACCTATTATACTCTGTGCAATGTCATTGAATGTCTTTACATGGGCTT  
GTATGCCTATGAAAATTGTAATACAACCTTTCAGCAACGGATCTCTTGGCTCTCGCATCGA  
TGAAGAACGCAGCGAAATGCGATAAGTAATGTGAATTGCAGAATTCAGTGAATCATCGAA  
TCTTTGAACGCATCTTGCGCTCCTTGGTATTCCGAGGAGCATGCCTGTTTGAGTGTCAAT  
AAATTCTCAACTCTCTTATAC-TTTTTGTAAAAGAGAGCTTGGACTGTGGAGGCTTGCT  
GGCCACTTTTTGGGGTCAGCTCCTCTGAAATGCATTAGCGGAACCGTTTGCGATCTGCCA  
CAAGTGTGATAAGTTATCTACACTGGCGAGGGGATTGCTCTCTGTAATGTTTCACTTCTA  
ATTGTCTCTACTTTGTGAGACTACTTTTGAATGCTTGACCTCAAATCAGGTAGGACTACC  
CGCTGAACTTAA

>ABC4-49

TTTCCGTAGGTGAACCTGCGGAAGGATCATTATTGAATTATGTTTCTAGATAGGTTGTAG  
CTGGCTCTTTTAGAGCATGTGCACGCCTGTTTGGACTTCATTTTCATCCACCTGTGCACC  
TATTGTAGTCTTTGGTTGGGTTAGGAGGAAGTGATCATTGTATCAGCATCTGCTGGGAGT  
GAGGACTTGCATTGTGAAAGCTTTGCTGTCCTTGATGTGATCATGGAATCTTTTTCTCAC  
TAGAGTCTATGTCACCTATTATACTCTGTGCAATGTCATTGAATGTCTTTACATGGGCTT  
GTATGCCTATGAAAATTGTAATACAACCTTTCAGCAACGGATCTCTTGGCTCTCGCATCGA  
TGAAGAACGCAGCGAAATGCGATAAGTAATGTGAATTGCAGAATTCAGTGAATCATCGAA  
TCTTTGAACGCATCTTGCGCTCCTTGGTATTCCGAGGAGCATGCCTGTTTGAGTGTCAAT  
AAATTCTCAACTCTCTTATAC-TTTTTGTAAAAGAGAGCTTGGACTGTGGAGGCTTGCT  
GGCCACTTTTTGGGGTCAGCTCCTCTGAAATGCATTAGCGGAACCGTTTGCGATCTGCCA  
CAAGTGTGATAAGTTATCTACACTGGCGAGGGGATTGCTCTCTGTAATGTTTCACTTCTA  
ATTGTCTCTACTTTGTGAGACTACTTTTGAATGCTTGACCTCAAATCAGGTAGGACTACC  
CGCTGAACTTAA

>ABC4-63

TTTCCGTAGGTGAACCTGCGGAAGGATCATTATTGAATTATGTTTCTAGATAGGTTGTAG  
CTGGCTCTTTTAGAGCATGTGCACGCCTGTTTGGACTTCATTTTCATCCACCTGTGCACC  
TATTGTAGTCTTTGGTTGGGTTAGGAGGAAGTGATCATTGTATCAGCATCTGCTGGGAGT  
GAGGACTTGCATTGTGAAAGCTTTGCTGTCCTTGATGTGATCATGGAATCTTTTTCTCAC  
TAGAGTCTATGTCACCTATTATACTCTGTGCAATGTCATTGAATGTCTTTACATGGGCTT  
GTATGCCTATGAAAATTGTAATACAACCTTTCAGCAACGGATCTCTTGGCTCTCGCATCGA  
TGAAGAACGCAGCGAAATGCGATAAGTAATGTGAATTGCAGAATTCAGTGAATCATCGAA  
TCTTTGAACGCATCTTGCGCTCCTTGGTATTCCGAGGAGCATGCCTGTTTGAGTGTCAAT  
AAATTCTCAACTCTCTTATAC-TTTTTGTAAAAGAGAGCTTGGACTGTGGAGGCTTGCT  
GGCCACTTTTTGGGGTCAGCTCCTCTGAAATGCATTAGCGGAACCGTTTGCGATCTGCCA  
CAAGTGTGATAAGTTATCTACACTGGCGAGGGGATTGCTCTCTGTAATGTTTCACTTCTA  
ATTGTCTCTACTTTGTGAGACTACTTTTGAATGCTTGACCTCAAATCAGGTAGGACTACC  
CGCTGAACTTAA

>ABC4-64

TTTCCGTAGGTGAACCTGCGGAAGGATCATTATTGAATTATGTTTCTAGATAGGTTGTAG  
CTGGCTCTTTTAGAGCATGTGCACGCCTGTTTGGACTTCATTTTCATCCACCTGTGCACC  
TATTGTAGTCTTTGGTTGGGTTAGGAGGAAGTGATCATTGTATCAGCATCTGCTGGGAGT  
GAGGACTTGCATTGTGAAAGCTTTGCTGTCCTTGATGTGATCATGGAATCTTTTTCTCAC  
TAGAGTCTATGTCACCTATTATACTCTGTGCAATGTCATTGAATGTCTTTACATGGGCTT  
GTATGCCTATGAAAATTGTAATACAACCTTTCAGCAACGGATCTCTTGGCTCTCGCATCGA  
TGAAGAACGCAGCGAAATGCGATAAGTAATGTGAATTGCAGAATTCAGTGAATCATCGAA  
TCTTTGAACGCATCTTGCGCTCCTTGGTATTCCGAGGAGCATGCCTGTTTGAGTGTCAAT  
AAATTCTCAACTCTCTTATAC-TTTTTGTAAAAGAGAGCTTGGACTGTGGAGGCTTGCT  
GGCCACTTTTTGGGGTCAGCTCCTCTGAAATGCATTAGCGGAACCGTTTGCGATCTGCCA  
CAAGTGTGATAAGTTATCTACACTGGCGAGGGGATTGCTCTCTGTAATGTTTCACTTCTA



ATTGTCTCTACTTTGTGAGACTACTTTTGAATGCTTGACCTCAAATCAGGTAGGACTACC  
CGCTGAACTTAA

>ABC4-73

TTTCCGTAGGTGAACCTGCGGAAGGATCATTATTGAATTATGTTTCTAGATAGGTTGTAG  
CTGGCTCTTTTAGAGCATGTGCACGCCTGTTTGGACTTCATTTTCATCCACCTGTGCACC  
TATTGTAGTCTTTGGTTGGGTTAGGAGGAAGTGATCATTGTATCAGCATCTGCTGGGAGT  
GAGGACTTGCATTGTGAAAGCTTTGCTGTCCTTGATGTGATCATGGAATCTTTTTCTCAC  
TAGAGTCTATGTCACTCATTATACTCTGTGCAATGTCATTGAATGTCTTTACATGGGCTT  
GTATGCCTATGAAAATTGTAATAACAACCTTTCAGCAACGGATCTCTTGGCTCTCGCATCGA  
TGAAGAACGCAGCGAAATGCGATAAGTAATGTGAATTGCAGAATTCAGTGAATCATCGAA  
TCTTTGAACGCATCTTGCCTCCTTGGTATTCCGAGGAGCATGCCTGTTTGAGTGTCAAT  
AAATTCTCAACTCTCTTATAC-TTTTTGTAAAAGAGAGCTTGGACTGTGGAGGCTTGCT  
GGCCACTTTTTGGGGTCAGCTCCTCTGAAATGCATTAGCGGAACCGTTTGCGATCTGCCA  
CAAGTGTGATAAGTTATCTACACTGGCGAGGGGATTGCTCTCTGTAATGTTTCAGCTTCTA  
ATTGTCTCTACTTTGTGAGACTACTTTTGAATGCTTGACCTCAAATCAGGTAGGACTACC  
CGCTGAACTTAA

>ABC4-74

TTTCCGTAGGTGAACCTGCGGAAGGATCATTATTGAATTATGTTTCTAGATAGGTTGTAG  
CTGGCTCTTTTAGAGCATGTGCACGCCTGTTTGGACTTCATTTTCATCCACCTGTGCACC  
TATTGTAGTCTTTGGTTGGGTTAGGAGGAAGTGATCATTGTATCAGCATCTGCTGGGAGT  
GAGGACTTGCATTGTGAAAGCTTTGCTGTCCTTGATGTGATCATGGAATCTTTTTCTCAC  
TAGAGTCTATGTCACTCATTATACTCTGTGCAATGTCATTGAATGTCTTTACATGGGCTT  
GTATGCCTATGAAAATTGTAATAACAACCTTTCAGCAACGGATCTCTTGGCTCTCGCATCGA  
TGAAGAACGCAGCGAAATGCGATAAGTAATGTGAATTGCAGAATTCAGTGAATCATCGAA  
TCTTTGAACGCATCTTGCCTCCTTGGTATTCCGAGGAGCATGCCTGTTTGAGTGTCAAT  
AAATTCTCAACTCTCTTATAC-TTTTTGTAAAAGAGAGCTTGGACTGTGGAGGCTTGCT  
GGCCACTTTTTGGGGTCAGCTCCTCTGAAATGCATTAGCGGAACCGTTTGCGATCTGCCA  
CAAGTGTGATAAGTTATCTACACTGGCGAGGGGATTGCTCTCTGTAATGTTTCAGCTTCTA  
ATTGTCTCTACTTTGTGAGACTACTTTTGAATGCTTGACCTCAAATCAGGTAGGACTACC  
CGCTGAACTTAA

>ABC4-76

TTTCCGTAGGTGAACCTGCGGAAGGATCATTATTGAATTATGTTTCTAGATAGGTTGTAG  
CTGGCTCTTTTAGAGCATGTGCACGCCTGTTTGGACTTCATTTTCATCCACCTGTGCACC  
TATTGTAGTCTTTGGTTGGGTTAGGAGGAAGTGATCATTGTATCAGCATCTGCTGGGAGT  
GAGGACTTGCATTGTGAAAGCTTTGCTGTCCTTGATGTGATCATGGAATCTTTTTCTCAC  
TAGAGTCTATGTCACTCATTATACTCTGTGCAATGTCATTGAATGTCTTTACATGGGCTT  
GTATGCCTATGAAAATTGTAATAACAACCTTTCAGCAACGGATCTCTTGGCTCTCGCATCGA  
TGAAGAACGCAGCGAAATGCGATAAGTAATGTGAATTGCAGAATTCAGTGAATCATCGAA  
TCTTTGAACGCATCTTGCCTCCTTGGTATTCCGAGGAGCATGCCTGTTTGAGTGTCAAT  
AAATTCTCAACTCTCTTATAC-TTTTTGTAAAAGAGAGCTTGGACTGTGGAGGCTTGCT  
GGCCACTTTTTGGGGTCAGCTCCTCTGAAATGCATTAGCGGAACCGTTTGCGATCTGCCA  
CAAGTGTGATAAGTTATCTACACTGGCGAGGGGATTGCTCTCTGTAATGTTTCAGCTTCTA  
ATTGTCTCTACTTTGTGAGACTACTTTTGAATGCTTGACCTCAAATCAGGTAGGACTACC  
CGCTGAACTTAA

>ABC4-78

TTTCCGTAGGTGAACCTGCGGAAGGATCATTATTGAATTATGTTTCTAGATAGGTTGTAG  
CTGGCTCTTTTAGAGCATGTGCACGCCTGTTTGGACTTCATTTTCATCCACCTGTGCACC  
TATTGTAGTCTTTGGTTGGGTTAGGAGGAAGTGATCATTGTATCAGCATCTGCTGGGAGT  
GAGGACTTGCATTGTGAAAGCTTTGCTGTCCTTGATGTGATCATGGAATCTTTTTCTCAC  
TAGAGTCTATGTCACTCATTATACTCTGTGCAATGTCATTGAATGTCTTTACATGGGCTT



GTATGCCTATGAAAATTGTAATACAACCTTTTCAGCAACGGATCTCTTGGCTCTCGCATCGA  
TGAAGAACGCAGCGAAATGCGATAAGTAATGTGAATTGCAGAATTCAGTGAATCATCGAA  
TCTTTGAACGCATCTTGCCTCCTTGGTATTCCGAGGAGCATGCCTGTTTGAGTGTCAAT  
AAATTCTCAACTCTCTTATAC-TTTTTTGAAAAGAGAGCTTGGACTGTGGAGGCTTGCT  
GGCCACTTTTTGGGGTCAGCTCCTCTGAAATGCATTAGCGGAACCGTTTGCGATCTGCCA  
CAAGTGTGATAAGTTATCTACACTGGCGAGGGGATTGCTCTCTGTAATGTTTCAGCTTCTA  
ATTGTCTCTACTTTGTGAGACTACTTTTGAATGCTTGACCTCAAATCAGGTAGGACTACC  
CGCTGAACTTAA

>ABC5-19

TTTCCGTAGGTGAACCTGCGGAAGGATCATTATTGAATTATGTTTCTAGATAGGTTGTAG  
CTGGCTCTTTTAGAGCATGTGCACGCCTGTTTGGACTTCATTTTCATCCACCTGTGCACC  
TATTGTAGTCTTTGGTTGGGTTAGGAGGAAGTGATCATTGTATCAGCATCTGCTGGGAGT  
GAGGACTTGCATTGTGAAAGCTTTGCTGTCCTTGATGTGATCATGGAATCTTTTTCTCAC  
TAGAGTCTATGTCACCTCATTATACTCTGTCTGAATGTCATTGAATGTCTTTACATGGGCTT  
GTATGCCTATGAAAATTGTAATACAACCTTTTCAGCAACGGATCTCTTGGCTCTCGCATCGA  
TGAAGAACGCAGCGAAATGCGATAAGTAATGTGAATTGCAGAATTCAGTGAATCATCGAA  
TCTTTGAACGCATCTTGCCTCCTTGGTATTCCGAGGAGCATGCCTGTTTGAGTGTCAAT  
AAATTCTCAACTCTCTTATAC-TTTTTTGAAAAGAGAGCTTGGACTGTGGAGGCTTGCT  
GGCCACTTTTTGGGGTCAGCTCCTCTGAAATGCATTAGCGGAACCGTTTGCGATCTGCCA  
CAAGTGTGATAAGTTATCTACACTGGCGAGGGGATTGCTCTCTGTAATGTTTCAGCTTCTA  
ATTGTCTCTACTTTGTGAGACTACTTTTGAATGCTTGACCTCAAATCAGGTAGGACTACC  
CGCTGAACTTAA

>ABC5-22

TTTCCGTAGGTGAACCTGCGGAAGGATCATTATTGAATTATGTTTCTAGATAGGTTGTAG  
CTGGCTCTTTTAGAGCATGTGCACGCCTGTTTGGACTTCATTTTCATCCACCTGTGCACC  
TATTGTAGTCTTTGGTTGGGTTAGGAGGAAGTGATCATTGTATCAGCATCTGCTGGGAGT  
GAGGACTTGCATTGTGAAAGCTTTGCTGTCCTTGATGTGATCATGGAATCTTTTTCTCAC  
TAGAGTCTATGTCACCTCATTATACTCTGTCTGAATGTCATTGAATGTCTTTACATGGGCTT  
GTATGCCTATGAAAATTGTAATACAACCTTTTCAGCAACGGATCTCTTGGCTCTCGCATCGA  
TGAAGAACGCAGCGAAATGCGATAAGTAATGTGAATTGCAGAATTCAGTGAATCATCGAA  
TCTTTGAACGCATCTTGCCTCCTTGGTATTCCGAGGAGCATGCCTGTTTGAGTGTCAAT  
AAATTCTCAACTCTCTTATAC-TTTTTTGAAAAGAGAGCTTGGACTGTGGAGGCTTGCT  
GGCCACTTTTTGGGGTCAGCTCCTCTGAAATGCATTAGCGGAACCGTTTGCGATCTGCCA  
CAAGTGTGATAAGTTATCTACACTGGCGAGGGGATTGCTCTCTGTAATGTTTCAGCTTCTA  
ATTGTCTCTACTTTGTGAGACTACTTTTGAATGCTTGACCTCAAATCAGGTAGGACTACC  
CGCTGAACTTAA

>ABC5-28

TTTCCGTAGGTGAACCTGCGGAAGGATCATTATTGAATTATGTTTCTAGATAGGTTGTAG  
CTGGCTCTTTTAGAGCATGTGCACGCCTGTTTGGACTTCATTTTCATCCACCTGTGCACC  
TATTGTAGTCTTTGGTTGGGTTAGGAGGAAGTGATCATTGTATCAGCATCTGCTGGGAGT  
GAGGACTTGCATTGTGAAAGCTTTGCTGTCCTTGATGTGATCATGGAATCTTTTTCTCAC  
TAGAGTCTATGTCACCTCATTATACTCTGTCTGAATGTCATTGAATGTCTTTACATGGGCTT  
GTATGCCTATGAAAATTGTAATACAACCTTTTCAGCAACGGATCTCTTGGCTCTCGCATCGA  
TGAAGAACGCAGCGAAATGCGATAAGTAATGTGAATTGCAGAATTCAGTGAATCATCGAA  
TCTTTGAACGCATCTTGCCTCCTTGGTATTCCGAGGAGCATGCCTGTTTGAGTGTCAAT  
AAATTCTCAACTCTCTTATAC-TTTTTTGAAAAGAGAGCTTGGACTGTGGAGGCTTGCT  
GGCCACTTTTTGGGGTCAGCTCCTCTGAAATGCATTAGCGGAACCGTTTGCGATCTGCCA  
CAAGTGTGATAAGTTATCTACACTGGCGAGGGGATTGCTCTCTGTAATGTTTCAGCTTCTA  
ATTGTCTCTACTTTGTGAGACTACTTTTGAATGCTTGACCTCAAATCAGGTAGGACTACC  
CGCTGAACTTAA



>ABC5-32

TTTCCGTAGGTGAACCTGCGGAAGGATCATTATTGAATTATGTTTCTAGATAGGTTGTAG  
CTGGCTCTTTTAGAGCATGTGCACGCCTGTTTGGACTTCATTTTCATCCACCTGTGCACC  
TATTGTAGTCTTTGGTTGGGTTAGGAGGAAGTGATCATTGTATCAGCATCTGCTGGGAGT  
GAGGACTTGCATTGTGAAAGCTTTGCTGTCCTTGATGTGATCATGGAATCTTTTTCTCAC  
TAGAGTCTATGTCACCTCATTATACTCTGTGCGAATGTCATTGAATGTCTTTACATGGGCTT  
GTATGCCTATGAAAATTGTAATACAACCTTTCAGCAACGGATCTCTTGGCTCTCGCATCGA  
TGAAGAACGCAGCGAAATGCGATAAGTAATGTGAATTGCAGAATTCAGTGAATCATCGAA  
TCTTTGAACGCATCTTGCCTCCTTGGTATTCCGAGGAGCATGCCTGTTTGAGTGTCAAT  
AAATTCTCAACTCTCTTATAC-TTTTTGTAAAAGAGAGCTTGGACTGTGGAGGCTTGCT  
GGCCACTTTTTGGGGTCAGCTCCTCTGAAATGCATTAGCGGAACCGTTTGCGATCTGCCA  
CAAGTGTGATAAGTTATCTACACTGGCGAGGGGATTGCTCTCTGTAATGTTTCAGCTTCTA  
ATTGTCTCTACTTTGTGAGACTACTTTTGAATGCTTGACCTCAAATCAGGTAGGACTACC  
CGCTGAACTTAA

>ABC5-35

TTTCCGTAGGTGAACCTGCGGAAGGATCATTATTGAATTATGTTTCTAGATAGGTTGTAG  
CTGGCTCTTTTAGAGCATGTGCACGCCTGTTTGGACTTCATTTTCATCCACCTGTGCACC  
TATTGTAGTCTTTGGTTGGGTTAGGAGGAAGTGATCATTGTATCAGCATCTGCTGGGAGT  
GAGGACTTGCATTGTGAAAGCTTTGCTGTCCTTGATGTGATCATGGAATCTTTTTCTCAC  
TAGAGTCTATGTCACCTCATTATACTCTGTGCGAATGTCATTGAATGTCTTTACATGGGCTT  
GTATGCCTATGAAAATTGTAATACAACCTTTCAGCAACGGATCTCTTGGCTCTCGCATCGA  
TGAAGAACGCAGCGAAATGCGATAAGTAATGTGAATTGCAGAATTCAGTGAATCATCGAA  
TCTTTGAACGCATCTTGCCTCCTTGGTATTCCGAGGAGCATGCCTGTTTGAGTGTCAAT  
AAATTCTCAACTCTCTTATAC-TTTTTGTAAAAGAGAGCTTGGACTGTGGAGGCTTGCT  
GGCCACTTTTTGGGGTCAGCTCCTCTGAAATGCATTAGCGGAACCGTTTGCGATCTGCCA  
CAAGTGTGATAAGTTATCTACACTGGCGAGGGGATTGCTCTCTGTAATGTTTCAGCTTCTA  
ATTGTCTCTACTTTGTGAGACTACTTTTGAATGCTTGACCTCAAATCAGGTAGGACTACC  
CGCTGAACTTAA

>ABC5-43

TTTCCGTAGGTGAACCTGCGGAAGGATCATTATTGAATTATGTTTCTAGATAGGTTGTAG  
CTGGCTCTTTTAGAGCATGTGCACGCCTGTTTGGACTTCATTTTCATCCACCTGTGCACC  
TATTGTAGTCTTTGGTTGGGTTAGGAGGAAGTGATCATTGTATCAGCATCTGCTGGGAGT  
GAGGACTTGCATTGTGAAAGCTTTGCTGTCCTTGATGTGATCATGGAATCTTTTTCTCAC  
TAGAGTCTATGTCACCTCATTATACTCTGTGCGAATGTCATTGAATGTCTTTACATGGGCTT  
GTATGCCTATGAAAATTGTAATACAACCTTTCAGCAACGGATCTCTTGGCTCTCGCATCGA  
TGAAGAACGCAGCGAAATGCGATAAGTAATGTGAATTGCAGAATTCAGTGAATCATCGAA  
TCTTTGAACGCATCTTGCCTCCTTGGTATTCCGAGGAGCATGCCTGTTTGAGTGTCAAT  
AAATTCTCAACTCTCTTATAC-TTTTTGTAAAAGAGAGCTTGGACTGTGGAGGCTTGCT  
GGCCACTTTTTGGGGTCAGCTCCTCTGAAATGCATTAGCGGAACCGTTTGCGATCTGCCA  
CAAGTGTGATAAGTTATCTACACTGGCGAGGGGATTGCTCTCTGTAATGTTTCAGCTTCTA  
ATTGTCTCTACTTTGTGAGACTACTTTTGAATGCTTGACCTCAAATCAGGTAGGACTACC  
CGCTGAACTTAA

>ABC5-62

TTTCCGTAGGTGAACCTGCGGAAGGATCATTATTGAATTATGTTTCTAGATAGGTTGTAG  
CTGGCTCTTTTAGAGCATGTGCACGCCTGTTTGGACTTCATTTTCATCCACCTGTGCACC  
TATTGTAGTCTTTGGTTGGGTTAGGAGGAAGTGATCATTGTATCAGCATCTGCTGGGAGT  
GAGGACTTGCATTGTGAAAGCTTTGCTGTCCTTGATGTGATCATGGAATCTTTTTCTCAC  
TAGAGTCTATGTCACCTCATTATACTCTGTGCGAATGTCATTGAATGTCTTTACATGGGCTT  
GTATGCCTATGAAAATTGTAATACAACCTTTCAGCAACGGATCTCTTGGCTCTCGCATCGA  
TGAAGAACGCAGCGAAATGCGATAAGTAATGTGAATTGCAGAATTCAGTGAATCATCGAA



TCTTTGAACGCATCTTGCGCTCCTTGGTATTCCGAGGAGCATGCCTGTTTGAGTGTCAATT  
AAATTCTCAACTCTCTTATAC-TTTTTGTAAAAGAGAGCTTGGACTGTGGAGGCTTGCT  
GGCCACTTTTTGGGGTCAGCTCCTCTGAAATGCATTAGCGGAACCGTTTGCGATCTGCCA  
CAAGTGTGATAAGTTATCTACACTGGCGAGGGGATTGCTCTCTGTAATGTTGAGCTTCTA  
ATTGTCTCTACTTTGTGAGACTACTTTTGAATGCTTGACCTCAAATCAGGTAGGACTACC  
CGCTGAACTTAA

>ABC5-65

TTTCCGTAGGTGAACCTGCGGAAGGATCATTATTGAATTATGTTTCTAGATAGGTTGTAG  
CTGGCTCTTTTAGAGCATGTGCACGCCTGTTTGGACTTCATTTTCATCCACCTGTGCACC  
TATTGTAGTCTTTGGTTGGGTTAGGAGGAAGTGATCATTGTATCAGCATCTGCTGGGAGT  
GAGGACTTGCAATTGTGAAAGCTTTGCTGTCTTGATGTGATCATGGAATCTTTTCTCAC  
TAGAGTCTATGTCACTCATTATACTCTGTGCAATGTCATTGAATGTCTTTACATGGGCTT  
GTATGCCTATGAAAATTGTAATACAACCTTTCAGCAACGGATCTCTTGGCTCTCGCATCGA  
TGAAGAACGCAGCGAAATGCGATAAGTAATGTGAATTGCAGAATTCAGTGAATCATCGAA  
TCTTTGAACGCATCTTGCGCTCCTTGGTATTCCGAGGAGCATGCCTGTTTGAGTGTCAATT  
AAATTCTCAACTCTCTTATAC-TTTTTGTAAAAGAGAGCTTGGACTGTGGAGGCTTGCT  
GGCCACTTTTTGGGGTCAGCTCCTCTGAAATGCATTAGCGGAACCGTTTGCGATCTGCCA  
CAAGTGTGATAAGTTATCTACACTGGCGAGGGGATTGCTCTCTGTAATGTTGAGCTTCTA  
ATTGTCTCTACTTTGTGAGACTACTTTTGAATGCTTGACCTCAAATCAGGTAGGACTACC  
CGCTGAACTTAA

>ABC5-69

TTTCCGTAGGTGAACCTGCGGAAGGATCATTATTGAATTATGTTTCTAGATAGGTTGTAG  
CTGGCTCTTTTAGAGCATGTGCACGCCTGTTTGGACTTCATTTTCATCCACCTGTGCACC  
TATTGTAGTCTTTGGTTGGGTTAGGAGGAAGTGATCATTGTATCAGCATCTGCTGGGAGT  
GAGGACTTGCAATTGTGAAAGCTTTGCTGTCTTGATGTGATCATGGAATCTTTTCTCAC  
TAGAGTCTATGTCACTCATTATACTCTGTGCAATGTCATTGAATGTCTTTACATGGGCTT  
GTATGCCTATGAAAATTGTAATACAACCTTTCAGCAACGGATCTCTTGGCTCTCGCATCGA  
TGAAGAACGCAGCGAAATGCGATAAGTAATGTGAATTGCAGAATTCAGTGAATCATCGAA  
TCTTTGAACGCATCTTGCGCTCCTTGGTATTCCGAGGAGCATGCCTGTTTGAGTGTCAATT  
AAATTCTCAACTCTCTTATAC-TTTTTGTAAAAGAGAGCTTGGACTGTGGAGGCTTGCT  
GGCCACTTTTTGGGGTCAGCTCCTCTGAAATGCATTAGCGGAACCGTTTGCGATCTGCCA  
CAAGTGTGATAAGTTATCTACACTGGCGAGGGGATTGCTCTCTGTAATGTTGAGCTTCTA  
ATTGTCTCTACTTTGTGAGACTACTTTTGAATGCTTGACCTCAAATCAGGTAGGACTACC  
CGCTGAACTTAA

>ABC5-76

TTTCCGTAGGTGAACCTGCGGAAGGATCATTATTGAATTATGTTTCTAGATAGGTTGTAG  
CTGGCTCTTTTAGAGCATGTGCACGCCTGTTTGGACTTCATTTTCATCCACCTGTGCACC  
TATTGTAGTCTTTGGTTGGGTTAGGAGGAAGTGATCATTGTATCAGCATCTGCTGGGAGT  
GAGGACTTGCAATTGTGAAAGCTTTGCTGTCTTGATGTGATCATGGAATCTTTTCTCAC  
TAGAGTCTATGTCACTCATTATACTCTGTGCAATGTCATTGAATGTCTTTACATGGGCTT  
GTATGCCTATGAAAATTGTAATACAACCTTTCAGCAACGGATCTCTTGGCTCTCGCATCGA  
TGAAGAACGCAGCGAAATGCGATAAGTAATGTGAATTGCAGAATTCAGTGAATCATCGAA  
TCTTTGAACGCATCTTGCGCTCCTTGGTATTCCGAGGAGCATGCCTGTTTGAGTGTCAATT  
AAATTCTCAACTCTCTTATAC-TTTTTGTAAAAGAGAGCTTGGACTGTGGAGGCTTGCT  
GGCCACTTTTTGGGGTCAGCTCCTCTGAAATGCATTAGCGGAACCGTTTGCGATCTGCCA  
CAAGTGTGATAAGTTATCTACACTGGCGAGGGGATTGCTCTCTGTAATGTTGAGCTTCTA  
ATTGTCTCTACTTTGTGAGACTACTTTTGAATGCTTGACCTCAAATCAGGTAGGACTACC  
CGCTGAACTTAA

>ABC5-77

TTTCCGTAGGTGAACCTGCGGAAGGATCATTATTGAATTATGTTTCTAGATAGGTTGTAG



CTGGCTCTTTTAGAGCATGTGCACGCCTGTTTGGACTTCATTTTCATCCACCTGTGCACC  
TATTGTAGTCTTTGGTTGGGTTAGGAGGAAGTGATCATTGTATCAGCATCTGCTGGGAGT  
GAGGACTTGCATTGTGAAAGCTTTGCTGTCCTTGATGTGATCATGGAATCTTTTCTCAC  
TAGAGTCTATGTCACCTATTATACTCTGTGCAATGTCATTGAATGTCTTTACATGGGCTT  
GTATGCCTATGAAAATTGTAATACAACCTTTCAGCAACGGATCTCTTGGCTCTCGCATCGA  
TGAAGAACGCAGCGAAATGCGATAAGTAATGTGAATTGCAGAATTCAGTGAATCATCGAA  
TCTTTGAACGCATCTTGCCTCCTTGGTATTCCGAGGAGCATGCCTGTTTGAGTGTCAAT  
AAATTCTCAACTCTCTTATAC-TTTTTTGTAAGAGAGCTTGGACTGTGGAGGCTTGCT  
GGCCACTTTTTGGGGTCAGCTCCTCTGAAATGCATTAGCGGAACCGTTTGCGATCTGCCA  
CAAGTGTGATAAGTTATCTACACTGGCGAGGGGATTGCTCTCTGTAATGTTGAGCTTCTA  
ATTGTCTCTACTTTGTGAGACTACTTTTGAATGCTTGACCTCAAATCAGGTAGGACTACC  
CGCTGAACTTAA

>ABC5-84

TTTCCGTAGGTGAACCTGCGGAAGGATCATTATTGAATTATGTTTCTAGATAGGTTGTAG  
CTGGCTCTTTTAGAGCATGTGCACGCCTGTTTGGACTTCATTTTCATCCACCTGTGCACC  
TATTGTAGTCTTTGGTTGGGTTAGGAGGAAGTGATCATTGTATCAGCATCTGCTGGGAGT  
GAGGACTTGCATTGTGAAAGCTTTGCTGTCCTTGATGTGATCATGGAATCTTTTCTCAC  
TAGAGTCTATGTCACCTATTATACTCTGTGCAATGTCATTGAATGTCTTTACATGGGCTT  
GTATGCCTATGAAAATTGTAATACAACCTTTCAGCAACGGATCTCTTGGCTCTCGCATCGA  
TGAAGAACGCAGCGAAATGCGATAAGTAATGTGAATTGCAGAATTCAGTGAATCATCGAA  
TCTTTGAACGCATCTTGCCTCCTTGGTATTCCGAGGAGCATGCCTGTTTGAGTGTCAAT  
AAATTCTCAACTCTCTTATAC-TTTTTTGTAAGAGAGCTTGGACTGTGGAGGCTTGCT  
GGCCACTTTTTGGGGTCAGCTCCTCTGAAATGCATTAGCGGAACCGTTTGCGATCTGCCA  
CAAGTGTGATAAGTTATCTACACTGGCGAGGGGATTGCTCTCTGTAATGTTGAGCTTCTA  
ATTGTCTCTACTTTGTGAGACTACTTTTGAATGCTTGACCTCAAATCAGGTAGGACTACC  
CGCTGAACTTAA

>ABC6-8

TTTCCGTAGGTGAACCTGCGGAAGGATCATTATTGAATTATGTTTCTAGATAGGTTGTAG  
CTGGCTCTTTTAGAGCATGTGCACGCCTGTTTGGACTTCATTTTCATCCACCTGTGCACC  
TATTGTAGTCTTTGGTTGGGTTAGGAGGAAGTGATCATTGTATCAGCATCTGCTGGGAGT  
GAGGACTTGCATTGTGAAAGCTTTGCTGTCCTTGATGTGATCATGGAATCTTTTCTCAC  
TAGAGTCTATGTCACCTATTATACTCTGTGCAATGTCATTGAATGTCTTTACATGGGCTT  
GTATGCCTATGAAAATTGTAATACAACCTTTCAGCAACGGATCTCTTGGCTCTCGCATCGA  
TGAAGAACGCAGCGAAATGCGATAAGTAATGTGAATTGCAGAATTCAGTGAATCATCGAA  
TCTTTGAACGCATCTTGCCTCCTTGGTATTCCGAGGAGCATGCCTGTTTGAGTGTCAAT  
AAATTCTCAACTCTCTTATAC-TTTTTTGTAAGAGAGCTTGGACTGTGGAGGCTTGCT  
GGCCACTTTTTGGGGTCAGCTCCTCTGAAATGCATTAGCGGAACCGTTTGCGATCTGCCA  
CAAGTGTGATAAGTTATCTACACTGGCGAGGGGATTGCTCTCTGTAATGTTGAGCTTCTA  
ATTGTCTCTACTTTGTGAGACTACTTTTGAATGCTTGACCTCAAATCAGGTAGGACTACC  
CGCTGAACTTAA

>ABC6-11

TTTCCGTAGGTGAACCTGCGGAAGGATCATTATTGAATTATGTTTCTAGATAGGTTGTAG  
CTGGCTCTTTTAGAGCATGTGCACGCCTGTTTGGACTTCATTTTCATCCACCTGTGCACC  
TATTGTAGTCTTTGGTTGGGTTAGGAGGAAGTGATCATTGTATCAGCATCTGCTGGGAGT  
GAGGACTTGCATTGTGAAAGCTTTGCTGTCCTTGATGTGATCATGGAATCTTTTCTCAC  
TAGAGTCTATGTCACCTATTATACTCTGTGCAATGTCATTGAATGTCTTTACATGGGCTT  
GTATGCCTATGAAAATTGTAATACAACCTTTCAGCAACGGATCTCTTGGCTCTCGCATCGA  
TGAAGAACGCAGCGAAATGCGATAAGTAATGTGAATTGCAGAATTCAGTGAATCATCGAA  
TCTTTGAACGCATCTTGCCTCCTTGGTATTCCGAGGAGCATGCCTGTTTGAGTGTCAAT  
AAATTCTCAACTCTCTTATAC-TTTTTTGTAAGAGAGCTTGGACTGTGGAGGCTTGCT



GGCCACTTTTTGGGGTCAGCTCCTCTGAAATGCATTAGCGGAACCGTTTGCGATCTGCCA  
CAAGTGTGATAAGTTATCTACACTGGCGAGGGGATTGCTCTCTGTAATGTTGAGCTTCTA  
ATTGTCTCTACTTTGTGAGACTACTTTTGAATGCTTGACCTCAAATCAGGTAGGACTACC  
CGCTGAACTTAA

>ABC6-20

TTTCCGTAGGTGAACCTGCGGAAGGATCATTATTGAATTATGTTTCTAGATAGGTTGTAG  
CTGGCTCTTTTAGAGCATGTGCACGCCTGTTTGGACTTCATTTTCATCCACCTGTGCACC  
TATTGTAGTCTTTGGTTGGGTTAGGAGGAAGTGATCATTGTATCAGCATCTGCTGGGAGT  
GAGGACTTGCATTGTGAAAGCTTTGCTGTCCTTGATGTGATCATGGAATCTTTTTCTCAC  
TAGAGTCTATGTCACTCATTATACTCTGTGCAATGTCATTGAATGTCTTTACATGGGCTT  
GTATGCCTATGAAAATTGTAATAACAACCTTTCAGCAACGGATCTCTTGGCTCTCGCATCGA  
TGAAGAACGCAGCGAAATGCGATAAGTAATGTGAATTGCAGAATTCAGTGAATCATCGAA  
TCTTTGAACGCATCTTGCGCTCCTTGGTATTCCGAGGAGCATGCCTGTTTGAGTGTCAAT  
AAATTCTCAACTCTCTTATAC-TTTTTGTAAAAGAGAGCTTGGACTGTGGAGGCTTGCT  
GGCCACTTTTTGGGGTCAGCTCCTCTGAAATGCATTAGCGGAACCGTTTGCGATCTGCCA  
CAAGTGTGATAAGTTATCTACACTGGCGAGGGGATTGCTCTCTGTAATGTTGAGCTTCTA  
ATTGTCTCTACTTTGTGAGACTACTTTTGAATGCTTGACCTCAAATCAGGTAGGACTACC  
CGCTGAACTTAA

>ABC6-24

TTTCCGTAGGTGAACCTGCGGAAGGATCATTATTGAATTATGTTTCTAGATAGGTTGTAG  
CTGGCTCTTTTAGAGCATGTGCACGCCTGTTTGGACTTCATTTTCATCCACCTGTGCACC  
TATTGTAGTCTTTGGTTGGGTTAGGAGGAAGTGATCATTGTATCAGCATCTGCTGGGAGT  
GAGGACTTGCATTGTGAAAGCTTTGCTGTCCTTGATGTGATCATGGAATCTTTTTCTCAC  
TAGAGTCTATGTCACTCATTATACTCTGTGCAATGTCATTGAATGTCTTTACATGGGCTT  
GTATGCCTATGAAAATTGTAATAACAACCTTTCAGCAACGGATCTCTTGGCTCTCGCATCGA  
TGAAGAACGCAGCGAAATGCGATAAGTAATGTGAATTGCAGAATTCAGTGAATCATCGAA  
TCTTTGAACGCATCTTGCGCTCCTTGGTATTCCGAGGAGCATGCCTGTTTGAGTGTCAAT  
AAATTCTCAACTCTCTTATAC-TTTTTGTAAAAGAGAGCTTGGACTGTGGAGGCTTGCT  
GGCCACTTTTTGGGGTCAGCTCCTCTGAAATGCATTAGCGGAACCGTTTGCGATCTGCCA  
CAAGTGTGATAAGTTATCTACACTGGCGAGGGGATTGCTCTCTGTAATGTTGAGCTTCTA  
ATTGTCTCTACTTTGTGAGACTACTTTTGAATGCTTGACCTCAAATCAGGTAGGACTACC  
CGCTGAACTTAA

>ABC6-27

TTTCCGTAGGTGAACCTGCGGAAGGATCATTATTGAATTATGTTTCTAGATAGGTTGTAG  
CTGGCTCTTTTAGAGCATGTGCACGCCTGTTTGGACTTCATTTTCATCCACCTGTGCACC  
TATTGTAGTCTTTGGTTGGGTTAGGAGGAAGTGATCATTGTATCAGCATCTGCTGGGAGT  
GAGGACTTGCATTGTGAAAGCTTTGCTGTCCTTGATGTGATCATGGAATCTTTTTCTCAC  
TAGAGTCTATGTCACTCATTATACTCTGTGCAATGTCATTGAATGTCTTTACATGGGCTT  
GTATGCCTATGAAAATTGTAATAACAACCTTTCAGCAACGGATCTCTTGGCTCTCGCATCGA  
TGAAGAACGCAGCGAAATGCGATAAGTAATGTGAATTGCAGAATTCAGTGAATCATCGAA  
TCTTTGAACGCATCTTGCGCTCCTTGGTATTCCGAGGAGCATGCCTGTTTGAGTGTCAAT  
AAATTCTCAACTCTCTTATAC-TTTTTGTAAAAGAGAGCTTGGACTGTGGAGGCTTGCT  
GGCCACTTTTTGGGGTCAGCTCCTCTGAAATGCATTAGCGGAACCGTTTGCGATCTGCCA  
CAAGTGTGATAAGTTATCTACACTGGCGAGGGGATTGCTCTCTGTAATGTTGAGCTTCTA  
ATTGTCTCTACTTTGTGAGACTACTTTTGAATGCTTGACCTCAAATCAGGTAGGACTACC  
CGCTGAACTTAA

>ABC6-30

TTTCCGTAGGTGAACCTGCGGAAGGATCATTATTGAATTATGTTTCTAGATAGGTTGTAG  
CTGGCTCTTTTAGAGCATGTGCACGCCTGTTTGGACTTCATTTTCATCCACCTGTGCACC  
TATTGTAGTCTTTGGTTGGGTTAGGAGGAAGTGATCATTGTATCAGCATCTGCTGGGAGT



GAGGACTTGCATTGTGAAAGCTTTGCTGTCCTTGATGTGATCATGGAATCTTTTTCTCAC  
TAGAGTCTATGTCACCTATTATACTCTGTGCAATGTCATTGAATGTCTTTACATGGGCTT  
GTATGCCTATGAAAATTGTAATACAACCTTTCAGCAACGGATCTCTTGGCTCTCGCATCGA  
TGAAGAACGCAGCGAAATGCGATAAGTAATGTGAATTGCAGAATTCAGTGAATCATCGAA  
TCTTTGAACGCATCTTGCGCTCCTTGGTATTCCGAGGAGCATGCCTGTTTGAGTGTGATT  
AAATTCTCAACTCTCTTATAC-TTTTTGTAAAAGAGAGCTTGGACTGTGGAGGCTTGCT  
GGCCACTTTTTGGGGTCAGCTCCTCTGAAATGCATTAGCGGAACCGTTTGCGATCTGCCA  
CAAGTGTGATAAGTTATCTACACTGGCGAGGGGATTGCTCTCTGTAATGTTTCACTTCTA  
ATTGTCTCTACTTTGTGAGACTACTTTTGAATGCTTGACCTCAAATCAGGTAGGACTACC  
CGCTGAACTTAA

>ABC6-43

TTTCCGTAGGTGAACCTGCGGAAGGATCATTATTGAATTATGTTTCTAGATAGGTTGTAG  
CTGGCTCTTTTAGAGCATGTGCACGCCTGTTTGGACTTCATTTTCATCCACCTGTGCACC  
TATTGTAGTCTTTGGTTGGGTTAGGAGGAAGTGATCATTGTATCAGCATCTGCTGGGAGT  
GAGGACTTGCATTGTGAAAGCTTTGCTGTCCTTGATGTGATCATGGAATCTTTTTCTCAC  
TAGAGTCTATGTCACCTATTATACTCTGTGCAATGTCATTGAATGTCTTTACATGGGCTT  
GTATGCCTATGAAAATTGTAATACAACCTTTCAGCAACGGATCTCTTGGCTCTCGCATCGA  
TGAAGAACGCAGCGAAATGCGATAAGTAATGTGAATTGCAGAATTCAGTGAATCATCGAA  
TCTTTGAACGCATCTTGCGCTCCTTGGTATTCCGAGGAGCATGCCTGTTTGAGTGTGATT  
AAATTCTCAACTCTCTTATAC-TTTTTGTAAAAGAGAGCTTGGACTGTGGAGGCTTGCT  
GGCCACTTTTTGGGGTCAGCTCCTCTGAAATGCATTAGCGGAACCGTTTGCGATCTGCCA  
CAAGTGTGATAAGTTATCTACACTGGCGAGGGGATTGCTCTCTGTAATGTTTCACTTCTA  
ATTGTCTCTACTTTGTGAGACTACTTTTGAATGCTTGACCTCAAATCAGGTAGGACTACC  
CGCTGAACTTAA

>ABC6-46

TTTCCGTAGGTGAACCTGCGGAAGGATCATTATTGAATTATGTTTCTAGATAGGTTGTAG  
CTGGCTCTTTTAGAGCATGTGCACGCCTGTTTGGACTTCATTTTCATCCACCTGTGCACC  
TATTGTAGTCTTTGGTTGGGTTAGGAGGAAGTGATCATTGTATCAGCATCTGCTGGGAGT  
GAGGACTTGCATTGTGAAAGCTTTGCTGTCCTTGATGTGATCATGGAATCTTTTTCTCAC  
TAGAGTCTATGTCACCTATTATACTCTGTGCAATGTCATTGAATGTCTTTACATGGGCTT  
GTATGCCTATGAAAATTGTAATACAACCTTTCAGCAACGGATCTCTTGGCTCTCGCATCGA  
TGAAGAACGCAGCGAAATGCGATAAGTAATGTGAATTGCAGAATTCAGTGAATCATCGAA  
TCTTTGAACGCATCTTGCGCTCCTTGGTATTCCGAGGAGCATGCCTGTTTGAGTGTGATT  
AAATTCTCAACTCTCTTATAC-TTTTTGTAAAAGAGAGCTTGGACTGTGGAGGCTTGCT  
GGCCACTTTTTGGGGTCAGCTCCTCTGAAATGCATTAGCGGAACCGTTTGCGATCTGCCA  
CAAGTGTGATAAGTTATCTACACTGGCGAGGGGATTGCTCTCTGTAATGTTTCACTTCTA  
ATTGTCTCTACTTTGTGAGACTACTTTTGAATGCTTGACCTCAAATCAGGTAGGACTACC  
CGCTGAACTTAA

>ABC6-56

TTTCCGTAGGTGAACCTGCGGAAGGATCATTATTGAATTATGTTTCTAGATAGGTTGTAG  
CTGGCTCTTTTAGAGCATGTGCACGCCTGTTTGGACTTCATTTTCATCCACCTGTGCACC  
TATTGTAGTCTTTGGTTGGGTTAGGAGGAAGTGATCATTGTATCAGCATCTGCTGGGAGT  
GAGGACTTGCATTGTGAAAGCTTTGCTGTCCTTGATGTGATCATGGAATCTTTTTCTCAC  
TAGAGTCTATGTCACCTATTATACTCTGTGCAATGTCATTGAATGTCTTTACATGGGCTT  
GTATGCCTATGAAAATTGTAATACAACCTTTCAGCAACGGATCTCTTGGCTCTCGCATCGA  
TGAAGAACGCAGCGAAATGCGATAAGTAATGTGAATTGCAGAATTCAGTGAATCATCGAA  
TCTTTGAACGCATCTTGCGCTCCTTGGTATTCCGAGGAGCATGCCTGTTTGAGTGTGATT  
AAATTCTCAACTCTCTTATAC-TTTTTGTAAAAGAGAGCTTGGACTGTGGAGGCTTGCT  
GGCCACTTTTTGGGGTCAGCTCCTCTGAAATGCATTAGCGGAACCGTTTGCGATCTGCCA  
CAAGTGTGATAAGTTATCTACACTGGCGAGGGGATTGCTCTCTGTAATGTTTCACTTCTA



ATTGTCTCTACTTTGTGAGACTACTTTTGAATGCTTGACCTCAAATCAGGTAGGACTACC  
CGCTGAACTTAA

>ABC7-34

TTTCCGTAGGTGAACCTGCGGAAGGATCATTATTGAATTATGTTTCTAGATAGGTTGTAG  
CTGGCTCTTTTAGAGCATGTGCACGCCTGTTTGGACTTCATTTTCATCCACCTGTGCACC  
TATTGTAGTCTTTGGTTGGGTTAGGAGGAAGTGATCATTGTATCAGCATCTGCTGGGAGT  
GAGGACTTGCATTGTGAAAGCTTTGCTGTCCTTGATGTGATCATGGAATCTTTTTCTCAC  
TAGAGTCTATGTCACTCATTATACTCTGTGCAATGTCATTGAATGTCTTTACATGGGCTT  
GTATGCCTATGAAAATTGTAATACAACCTTTCAGCAACGGATCTCTTGGCTCTCGCATCGA  
TGAAGAACGCAGCGAAATGCGATAAGTAATGTGAATTGCAGAATTCAGTGAATCATCGAA  
TCTTTGAACGCATCTTGCCTCCTTGGTATTCCGAGGAGCATGCCTGTTTGAGTGTCAAT  
AAATTCTCAACTCTCTTATAC-TTTTTGTAAAAGAGAGCTTGGACTGTGGAGGCTTGCT  
GGCCACTTTTTGGGGTCAGCTCCTCTGAAATGCATTAGCGGAACCGTTTGCGATCTGCCA  
CAAGTGTGATAAGTTATCTA CACTGGCGAGGGGATTGCTCTCTGTAATGTT CAGCTTCTA  
ATTGTCTCTACTTTGTGAGACTACTTTTGAATGCTTGACCTCAAATCAGGTAGGACTACC  
CGCTGAACTTAA

>ABC7-37

TTTCCGTAGGTGAACCTGCGGAAGGATCATTATTGAATTATGTTTCTAGATAGGTTGTAG  
CTGGCTCTTTTAGAGCATGTGCACGCCTGTTTGGACTTCATTTTCATCCACCTGTGCACC  
TATTGTAGTCTTTGGTTGGGTTAGGAGGAAGTGATCATTGTATCAGCATCTGCTGGGAGT  
GAGGACTTGCATTGTGAAAGCTTTGCTGTCCTTGATGTGATCATGGAATCTTTTTCTCAC  
TAGAGTCTATGTCACTCATTATACTCTGTGCAATGTCATTGAATGTCTTTACATGGGCTT  
GTATGCCTATGAAAATTGTAATACAACCTTTCAGCAACGGATCTCTTGGCTCTCGCATCGA  
TGAAGAACGCAGCGAAATGCGATAAGTAATGTGAATTGCAGAATTCAGTGAATCATCGAA  
TCTTTGAACGCATCTTGCCTCCTTGGTATTCCGAGGAGCATGCCTGTTTGAGTGTCAAT  
AAATTCTCAACTCTCTTATAC-TTTTTGTAAAAGAGAGCTTGGACTGTGGAGGCTTGCT  
GGCCACTTTTTGGGGTCAGCTCCTCTGAAATGCATTAGCGGAACCGTTTGCGATCTGCCA  
CAAGTGTGATAAGTTATCTA CACTGGCGAGGGGATTGCTCTCTGTAATGTT CAGCTTCTA  
ATTGTCTCTACTTTGTGAGACTACTTTTGAATGCTTGACCTCAAATCAGGTAGGACTACC  
CGCTGAACTTAA

>ABC7-42

TTTCCGTAGGTGAACCTGCGGAAGGATCATTATTGAATTATGTTTCTAGATAGGTTGTAG  
CTGGCTCTTTTAGAGCATGTGCACGCCTGTTTGGACTTCATTTTCATCCACCTGTGCACC  
TATTGTAGTCTTTGGTTGGGTTAGGAGGAAGTGATCATTGTATCAGCATCTGCTGGGAGT  
GAGGACTTGCATTGTGAAAGCTTTGCTGTCCTTGATGTGATCATGGAATCTTTTTCTCAC  
TAGAGTCTATGTCACTCATTATACTCTGTGCAATGTCATTGAATGTCTTTACATGGGCTT  
GTATGCCTATGAAAATTGTAATACAACCTTTCAGCAACGGATCTCTTGGCTCTCGCATCGA  
TGAAGAACGCAGCGAAATGCGATAAGTAATGTGAATTGCAGAATTCAGTGAATCATCGAA  
TCTTTGAACGCATCTTGCCTCCTTGGTATTCCGAGGAGCATGCCTGTTTGAGTGTCAAT  
AAATTCTCAACTCTCTTATAC-TTTTTGTAAAAGAGAGCTTGGACTGTGGAGGCTTGCT  
GGCCACTTTTTGGGGTCAGCTCCTCTGAAATGCATTAGCGGAACCGTTTGCGATCTGCCA  
CAAGTGTGATAAGTTATCTA CACTGGCGAGGGGATTGCTCTCTGTAATGTT CAGCTTCTA  
ATTGTCTCTACTTTGTGAGACTACTTTTGAATGCTTGACCTCAAATCAGGTAGGACTACC  
CGCTGAACTTAA

>ABC7-47

TTTCCGTAGGTGAACCTGCGGAAGGATCATTATTGAATTATGTTTCTAGATAGGTTGTAG  
CTGGCTCTTTTAGAGCATGTGCACGCCTGTTTGGACTTCATTTTCATCCACCTGTGCACC  
TATTGTAGTCTTTGGTTGGGTTAGGAGGAAGTGATCATTGTATCAGCATCTGCTGGGAGT  
GAGGACTTGCATTGTGAAAGCTTTGCTGTCCTTGATGTGATCATGGAATCTTTTTCTCAC  
TAGAGTCTATGTCACTCATTATACTCTGTGCAATGTCATTGAATGTCTTTACATGGGCTT



GTATGCCTATGAAAATTGTAATACAACCTTTTCAGCAACGGATCTCTTGGCTCTCGCATCGA  
TGAAGAACGCAGCGAAATGCGATAAGTAATGTGAATTGCAGAATTCAGTGAATCATCGAA  
TCTTTGAACGCATCTTGCCTCCTTGGTATTCCGAGGAGCATGCCTGTTTGAGTGTCAAT  
AAATTCTCAACTCTCTTATAC-TTTTTTGAAAAGAGAGCTTGGACTGTGGAGGCTTGCT  
GGCCACTTTTTGGGGTCAGCTCCTCTGAAATGCATTAGCGGAACCGTTTGCGATCTGCCA  
CAAGTGTGATAAGTTATCTACACTGGCGAGGGGATTGCTCTCTGTAATGTTTCAGCTTCTA  
ATTGTCTCTACTTTGTGAGACTACTTTTGAATGCTTGACCTCAAATCAGGTAGGACTACC  
CGCTGAACTTAA

>ABC7-49

TTTCCGTAGGTGAACCTGCGGAAGGATCATTATTGAATTATGTTTCTAGATAGGTTGTAG  
CTGGCTCTTTTAGAGCATGTGCACGCCTGTTTGGACTTCATTTTCATCCACCTGTGCACC  
TATTGTAGTCTTTGGTTGGGTTAGGAGGAAGTGATCATTGTATCAGCATCTGCTGGGAGT  
GAGGACTTGCATTGTGAAAGCTTTGCTGTCCTTGATGTGATCATGGAATCTTTTTCTCAC  
TAGAGTCTATGTCACCTCATTATACTCTGTCTGAATGTCATTGAATGTCTTTACATGGGCTT  
GTATGCCTATGAAAATTGTAATACAACCTTTTCAGCAACGGATCTCTTGGCTCTCGCATCGA  
TGAAGAACGCAGCGAAATGCGATAAGTAATGTGAATTGCAGAATTCAGTGAATCATCGAA  
TCTTTGAACGCATCTTGCCTCCTTGGTATTCCGAGGAGCATGCCTGTTTGAGTGTCAAT  
AAATTCTCAACTCTCTTATAC-TTTTTTGAAAAGAGAGCTTGGACTGTGGAGGCTTGCT  
GGCCACTTTTTGGGGTCAGCTCCTCTGAAATGCATTAGCGGAACCGTTTGCGATCTGCCA  
CAAGTGTGATAAGTTATCTACACTGGCGAGGGGATTGCTCTCTGTAATGTTTCAGCTTCTA  
ATTGTCTCTACTTTGTGAGACTACTTTTGAATGCTTGACCTCAAATCAGGTAGGACTACC  
CGCTGAACTTAA

>ABC7-54

TTTCCGTAGGTGAACCTGCGGAAGGATCATTATTGAATTATGTTTCTAGATAGGTTGTAG  
CTGGCTCTTTTAGAGCATGTGCACGCCTGTTTGGACTTCATTTTCATCCACCTGTGCACC  
TATTGTAGTCTTTGGTTGGGTTAGGAGGAAGTGATCATTGTATCAGCATCTGCTGGGAGT  
GAGGACTTGCATTGTGAAAGCTTTGCTGTCCTTGATGTGATCATGGAATCTTTTTCTCAC  
TAGAGTCTATGTCACCTCATTATACTCTGTCTGAATGTCATTGAATGTCTTTACATGGGCTT  
GTATGCCTATGAAAATTGTAATACAACCTTTTCAGCAACGGATCTCTTGGCTCTCGCATCGA  
TGAAGAACGCAGCGAAATGCGATAAGTAATGTGAATTGCAGAATTCAGTGAATCATCGAA  
TCTTTGAACGCATCTTGCCTCCTTGGTATTCCGAGGAGCATGCCTGTTTGAGTGTCAAT  
AAATTCTCAACTCTCTTATAC-TTTTTTGAAAAGAGAGCTTGGACTGTGGAGGCTTGCT  
GGCCACTTTTTGGGGTCAGCTCCTCTGAAATGCATTAGCGGAACCGTTTGCGATCTGCCA  
CAAGTGTGATAAGTTATCTACACTGGCGAGGGGATTGCTCTCTGTAATGTTTCAGCTTCTA  
ATTGTCTCTACTTTGTGAGACTACTTTTGAATGCTTGACCTCAAATCAGGTAGGACTACC  
CGCTGAACTTAA

>ABC8-4

TTTCCGTAGGTGAACCTGCGGAAGGATCATTATTGAATTATGTTTCTAGATAGGTTGTAG  
CTGGCTCTTTTAGAGCATGTGCACGCCTGTTTGGACTTCATTTTCATCCACCTGTGCACC  
TATTGTAGTCTTTGGTTGGGTTAGGAGGAAGTGATCATTGTATCAGCATCTGCTGGGAGT  
GAGGACTTGCATTGTGAAAGCTTTGCTGTCCTTGATGTGATCATGGAATCTTTTTCTCAC  
TAGAGTCTATGTCACCTCATTATACTCTGTCTGAATGTCATTGAATGTCTTTACATGGGCTT  
GTATGCCTATGAAAATTGTAATACAACCTTTTCAGCAACGGATCTCTTGGCTCTCGCATCGA  
TGAAGAACGCAGCGAAATGCGATAAGTAATGTGAATTGCAGAATTCAGTGAATCATCGAA  
TCTTTGAACGCATCTTGCCTCCTTGGTATTCCGAGGAGCATGCCTGTTTGAGTGTCAAT  
AAATTCTCAACTCTCTTATAC-TTTTTTGAAAAGAGAGCTTGGACTGTGGAGGCTTGCT  
GGCCACTTTTTGGGGTCAGCTCCTCTGAAATGCATTAGCGGAACCGTTTGCGATCTGCCA  
CAAGTGTGATAAGTTATCTACACTGGCGAGGGGATTGCTCTCTGTAATGTTTCAGCTTCTA  
ATTGTCTCTACTTTGTGAGACTACTTTTGAATGCTTGACCTCAAATCAGGTAGGACTACC  
CGCTGAACTTAA



>ABC8-17

TTTCCGTAGGTGAACCTGCGGAAGGATCATTATTGAATTATGTTTCTAGATAGGTTGTAG  
CTGGCTCTTTTAGAGCATGTGCACGCCTGTTTGGACTTCATTTTCATCCACCTGTGCACC  
TATTGTAGTCTTTGGTTGGGTTAGGAGGAAGTGATCATTGTATCAGCATCTGCTGGGAGT  
GAGGACTTGCATTGTGAAAGCTTTGCTGTCCTTGATGTGATCATGGAATCTTTTTCTCAC  
TAGAGTCTATGTCACCTCATTATACTCTGTGCGAATGTCATTGAATGTCTTTACATGGGCTT  
GTATGCCTATGAAAATTGTAATACAACCTTTCAGCAACGGATCTCTTGGCTCTCGCATCGA  
TGAAGAACGCAGCGAAATGCGATAAGTAATGTGAATTGCAGAATTCAGTGAATCATCGAA  
TCTTTGAACGCATCTTGCGCTCCTTGGTATTCCGAGGAGCATGCCTGTTTGAGTGTCATT  
AAATTCTCAACTCTCTTATAC-TTTTTGTAAAAGAGAGCTTGGACTGTGGAGGCTTGCT  
GGCCACTTTTTGGGGTCAGCTCCTCTGAAATGCATTAGCGGAACCGTTTGCGATCTGCCA  
CAAGTGTGATAAGTTATCTACACTGGCGAGGGGATTGCTCTCTGTAATGTTTCAGCTTCTA  
ATTGTCTCTACTTTGTGAGACTACTTTTGAATGCTTGACCTCAAATCAGGTAGGACTACC  
CGCTGAACTTAA

>ABC8-23

TTTCCGTAGGTGAACCTGCGGAAGGATCATTATTGAATTATGTTTCTAGATAGGTTGTAG  
CTGGCTCTTTTAGAGCATGTGCACGCCTGTTTGGACTTCATTTTCATCCACCTGTGCACC  
TATTGTAGTCTTTGGTTGGGTTAGGAGGAAGTGATCATTGTATCAGCATCTGCTGGGAGT  
GAGGACTTGCATTGTGAAAGCTTTGCTGTCCTTGATGTGATCATGGAATCTTTTTCTCAC  
TAGAGTCTATGTCACCTCATTATACTCTGTGCGAATGTCATTGAATGTCTTTACATGGGCTT  
GTATGCCTATGAAAATTGTAATACAACCTTTCAGCAACGGATCTCTTGGCTCTCGCATCGA  
TGAAGAACGCAGCGAAATGCGATAAGTAATGTGAATTGCAGAATTCAGTGAATCATCGAA  
TCTTTGAACGCATCTTGCGCTCCTTGGTATTCCGAGGAGCATGCCTGTTTGAGTGTCATT  
AAATTCTCAACTCTCTTATAC-TTTTTGTAAAAGAGAGCTTGGACTGTGGAGGCTTGCT  
GGCCACTTTTTGGGGTCAGCTCCTCTGAAATGCATTAGCGGAACCGTTTGCGATCTGCCA  
CAAGTGTGATAAGTTATCTACACTGGCGAGGGGATTGCTCTCTGTAATGTTTCAGCTTCTA  
ATTGTCTCTACTTTGTGAGACTACTTTTGAATGCTTGACCTCAAATCAGGTAGGACTACC  
CGCTGAACTTAA

>ABC8-30

TTTCCGTAGGTGAACCTGCGGAAGGATCATTATTGAATTATGTTTCTAGATAGGTTGTAG  
CTGGCTCTTTTAGAGCATGTGCACGCCTGTTTGGACTTCATTTTCATCCACCTGTGCACC  
TATTGTAGTCTTTGGTTGGGTTAGGAGGAAGTGATCATTGTATCAGCATCTGCTGGGAGT  
GAGGACTTGCATTGTGAAAGCTTTGCTGTCCTTGATGTGATCATGGAATCTTTTTCTCAC  
TAGAGTCTATGTCACCTCATTATACTCTGTGCGAATGTCATTGAATGTCTTTACATGGGCTT  
GTATGCCTATGAAAATTGTAATACAACCTTTCAGCAACGGATCTCTTGGCTCTCGCATCGA  
TGAAGAACGCAGCGAAATGCGATAAGTAATGTGAATTGCAGAATTCAGTGAATCATCGAA  
TCTTTGAACGCATCTTGCGCTCCTTGGTATTCCGAGGAGCATGCCTGTTTGAGTGTCATT  
AAATTCTCAACTCTCTTATAC-TTTTTGTAAAAGAGAGCTTGGACTGTGGAGGCTTGCT  
GGCCACTTTTTGGGGTCAGCTCCTCTGAAATGCATTAGCGGAACCGTTTGCGATCTGCCA  
CAAGTGTGATAAGTTATCTACACTGGCGAGGGGATTGCTCTCTGTAATGTTTCAGCTTCTA  
ATTGTCTCTACTTTGTGAGACTACTTTTGAATGCTTGACCTCAAATCAGGTAGGACTACC  
CGCTGAACTTAA

>ABC8-38

TTTCCGTAGGTGAACCTGCGGAAGGATCATTATTGAATTATGTTTCTAGATAGGTTGTAG  
CTGGCTCTTTTAGAGCATGTGCACGCCTGTTTGGACTTCATTTTCATCCACCTGTGCACC  
TATTGTAGTCTTTGGTTGGGTTAGGAGGAAGTGATCATTGTATCAGCATCTGCTGGGAGT  
GAGGACTTGCATTGTGAAAGCTTTGCTGTCCTTGATGTGATCATGGAATCTTTTTCTCAC  
TAGAGTCTATGTCACCTCATTATACTCTGTGCGAATGTCATTGAATGTCTTTACATGGGCTT  
GTATGCCTATGAAAATTGTAATACAACCTTTCAGCAACGGATCTCTTGGCTCTCGCATCGA  
TGAAGAACGCAGCGAAATGCGATAAGTAATGTGAATTGCAGAATTCAGTGAATCATCGAA



TCTTTGAACGCATCTTGCGCTCCTTGGTATTCCGAGGAGCATGCCTGTTTGAGTGTCAATT  
AAATTCTCAACTCTCTTATAC-TTTTTGTAAAAGAGAGCTTGGACTGTGGAGGCTTGCT  
GGCCACTTTTTGGGGTCAGCTCCTCTGAAATGCATTAGCGGAACCGTTTGCGATCTGCCA  
CAAGTGTGATAAGTTATCTACACTGGCGAGGGGATTGCTCTCTGTAATGTTGAGCTTCTA  
ATTGTCTCTACTTTGTGAGACTACTTTTGAATGCTTGACCTCAAATCAGGTAGGACTACC  
CGCTGAACTTAA

>ABC9-1

TTTCCGTAGGTGAACCTGCGGAAGGATCATTATTGAATTATGTTTCTAGATAGGTTGTAG  
CTGGCTCTTTTAGAGCATGTGCACGCCTGTTTGGACTTCATTTTCATCCACCTGTGCACC  
TATTGTAGTCTTTGGTTGGGTTAGGAGGAAGTGATCATTGTATCAGCATCTGCTGGGAGT  
GAGGACTTGCAATTGTGAAAGCTTTGCTGTCCTTGATGTGATCATGGAATCTTTTCTCAC  
TAGAGTCTATGTCACCTCATTATACTCTGTGCAATGTCATTGAATGTCTTTACATGGGCTT  
GTATGCCTATGAAAATTGTAATACAACCTTTCAGCAACGGATCTCTTGGCTCTCGCATCGA  
TGAAGAACGCAGCGAAATGCGATAAGTAATGTGAATTGCAGAATTCAGTGAATCATCGAA  
TCTTTGAACGCATCTTGCGCTCCTTGGTATTCCGAGGAGCATGCCTGTTTGAGTGTCAATT  
AAATTCTCAACTCTCTTATAC-TTTTTGTAAAAGAGAGCTTGGACTGTGGAGGCTTGCT  
GGCCACTTTTTGGGGTCAGCTCCTCTGAAATGCATTAGCGGAACCGTTTGCGATCTGCCA  
CAAGTGTGATAAGTTATCTACACTGGCGAGGGGATTGCTCTCTGTAATGTTGAGCTTCTA  
ATTGTCTCTACTTTGTGAGACTACTTTTGAATGCTTGACCTCAAATCAGGTAGGACTACC  
CGCTGAACTTAA

>ABC9-4

TTTCCGTAGGTGAACCTGCGGAAGGATCATTATTGAATTATGTTTCTAGATAGGTTGTAG  
CTGGCTCTTTTAGAGCATGTGCACGCCTGTTTGGACTTCATTTTCATCCACCTGTGCACC  
TATTGTAGTCTTTGGTTGGGTTAGGAGGAAGTGATCATTGTATCAGCATCTGCTGGGAGT  
GAGGACTTGCAATTGTGAAAGCTTTGCTGTCCTTGATGTGATCATGGAATCTTTTCTCAC  
TAGAGTCTATGTCACCTCATTATACTCTGTGCAATGTCATTGAATGTCTTTACATGGGCTT  
GTATGCCTATGAAAATTGTAATACAACCTTTCAGCAACGGATCTCTTGGCTCTCGCATCGA  
TGAAGAACGCAGCGAAATGCGATAAGTAATGTGAATTGCAGAATTCAGTGAATCATCGAA  
TCTTTGAACGCATCTTGCGCTCCTTGGTATTCCGAGGAGCATGCCTGTTTGAGTGTCAATT  
AAATTCTCAACTCTCTTATAC-TTTTTGTAAAAGAGAGCTTGGACTGTGGAGGCTTGCT  
GGCCACTTTTTGGGGTCAGCTCCTCTGAAATGCATTAGCGGAACCGTTTGCGATCTGCCA  
CAAGTGTGATAAGTTATCTACACTGGCGAGGGGATTGCTCTCTGTAATGTTGAGCTTCTA  
ATTGTCTCTACTTTGTGAGACTACTTTTGAATGCTTGACCTCAAATCAGGTAGGACTACC  
CGCTGAACTTAA

>ABC9-16

TTTCCGTAGGTGAACCTGCGGAAGGATCATTATTGAATTATGTTTCTAGATAGGTTGTAG  
CTGGCTCTTTTAGAGCATGTGCACGCCTGTTTGGACTTCATTTTCATCCACCTGTGCACC  
TATTGTAGTCTTTGGTTGGGTTAGGAGGAAGTGATCATTGTATCAGCATCTGCTGGGAGT  
GAGGACTTGCAATTGTGAAAGCTTTGCTGTCCTTGATGTGATCATGGAATCTTTTCTCAC  
TAGAGTCTATGTCACCTCATTATACTCTGTGCAATGTCATTGAATGTCTTTACATGGGCTT  
GTATGCCTATGAAAATTGTAATACAACCTTTCAGCAACGGATCTCTTGGCTCTCGCATCGA  
TGAAGAACGCAGCGAAATGCGATAAGTAATGTGAATTGCAGAATTCAGTGAATCATCGAA  
TCTTTGAACGCATCTTGCGCTCCTTGGTATTCCGAGGAGCATGCCTGTTTGAGTGTCAATT  
AAATTCTCAACTCTCTTATAC-TTTTTGTAAAAGAGAGCTTGGACTGTGGAGGCTTGCT  
GGCCACTTTTTGGGGTCAGCTCCTCTGAAATGCATTAGCGGAACCGTTTGCGATCTGCCA  
CAAGTGTGATAAGTTATCTACACTGGCGAGGGGATTGCTCTCTGTAATGTTGAGCTTCTA  
ATTGTCTCTACTTTGTGAGACTACTTTTGAATGCTTGACCTCAAATCAGGTAGGACTACC  
CGCTGAACTTAA

>ABC9-29

TTTCCGTAGGTGAACCTGCGGAAGGATCATTATTGAATTATGTTTCTAGATAGGTTGTAG



CTGGCTCTTTTAGAGCATGTGCACGCCTGTTTGGACTTCATTTTCATCCACCTGTGCACC  
TATTGTAGTCTTTGGTTGGGTTAGGAGGAAGTGATCATTGTATCAGCATCTGCTGGGAGT  
GAGGACTTGCATTGTGAAAGCTTTGCTGTCCTTGATGTGATCATGGAATCTTTTCTCAC  
TAGAGTCTATGTCACCTATTATACTCTGTGCAATGTCATTGAATGTCTTTACATGGGCTT  
GTATGCCTATGAAAATTGTAATAACAACCTTTCAGCAACGGATCTCTTGGCTCTCGCATCGA  
TGAAGAACGCAGCGAAATGCGATAAGTAATGTGAATTGCAGAATTCAGTGAATCATCGAA  
TCTTTGAACGCATCTTGCCTCCTTGGTATTCCGAGGAGCATGCCTGTTTGAGTGTCAAT  
AAATTCTCAACTCTCTTATAC-TTTTTTGTAAGAGAGCTTGGACTGTGGAGGCTTGCT  
GGCCACTTTTTGGGGTCAGCTCCTCTGAAATGCATTAGCGGAACCGTTTGCGATCTGCCA  
CAAGTGTGATAAGTTATCTACACTGGCGAGGGGATTGCTCTCTGTAATGTTGAGCTTCTA  
ATTGTCTCTACTTTGTGAGACTACTTTTGAATGCTTGACCTCAAATCAGGTAGGACTACC  
CGCTGAACTTAA

>ABC9-35

TTTCCGTAGGTGAACCTGCGGAAGGATCATTATTGAATTATGTTTCTAGATAGGTTGTAG  
CTGGCTCTTTTAGAGCATGTGCACGCCTGTTTGGACTTCATTTTCATCCACCTGTGCACC  
TATTGTAGTCTTTGGTTGGGTTAGGAGGAAGTGATCATTGTATCAGCATCTGCTGGGAGT  
GAGGACTTGCATTGTGAAAGCTTTGCTGTCCTTGATGTGATCATGGAATCTTTTCTCAC  
TAGAGTCTATGTCACCTATTATACTCTGTGCAATGTCATTGAATGTCTTTACATGGGCTT  
GTATGCCTATGAAAATTGTAATAACAACCTTTCAGCAACGGATCTCTTGGCTCTCGCATCGA  
TGAAGAACGCAGCGAAATGCGATAAGTAATGTGAATTGCAGAATTCAGTGAATCATCGAA  
TCTTTGAACGCATCTTGCCTCCTTGGTATTCCGAGGAGCATGCCTGTTTGAGTGTCAAT  
AAATTCTCAACTCTCTTATAC-TTTTTTGTAAGAGAGCTTGGACTGTGGAGGCTTGCT  
GGCCACTTTTTGGGGTCAGCTCCTCTGAAATGCATTAGCGGAACCGTTTGCGATCTGCCA  
CAAGTGTGATAAGTTATCTACACTGGCGAGGGGATTGCTCTCTGTAATGTTGAGCTTCTA  
ATTGTCTCTACTTTGTGAGACTACTTTTGAATGCTTGACCTCAAATCAGGTAGGACTACC  
CGCTGAACTTAA

>ABC9-37

TTTCCGTAGGTGAACCTGCGGAAGGATCATTATTGAATTATGTTTCTAGATAGGTTGTAG  
CTGGCTCTTTTAGAGCATGTGCACGCCTGTTTGGACTTCATTTTCATCCACCTGTGCACC  
TATTGTAGTCTTTGGTTGGGTTAGGAGGAAGTGATCATTGTATCAGCATCTGCTGGGAGT  
GAGGACTTGCATTGTGAAAGCTTTGCTGTCCTTGATGTGATCATGGAATCTTTTCTCAC  
TAGAGTCTATGTCACCTATTATACTCTGTGCAATGTCATTGAATGTCTTTACATGGGCTT  
GTATGCCTATGAAAATTGTAATAACAACCTTTCAGCAACGGATCTCTTGGCTCTCGCATCGA  
TGAAGAACGCAGCGAAATGCGATAAGTAATGTGAATTGCAGAATTCAGTGAATCATCGAA  
TCTTTGAACGCATCTTGCCTCCTTGGTATTCCGAGGAGCATGCCTGTTTGAGTGTCAAT  
AAATTCTCAACTCTCTTATAC-TTTTTTGTAAGAGAGCTTGGACTGTGGAGGCTTGCT  
GGCCACTTTTTGGGGTCAGCTCCTCTGAAATGCATTAGCGGAACCGTTTGCGATCTGCCA  
CAAGTGTGATAAGTTATCTACACTGGCGAGGGGATTGCTCTCTGTAATGTTGAGCTTCTA  
ATTGTCTCTACTTTGTGAGACTACTTTTGAATGCTTGACCTCAAATCAGGTAGGACTACC  
CGCTGAACTTAA

>ABC9-50

TTTCCGTAGGTGAACCTGCGGAAGGATCATTATTGAATTATGTTTCTAGATAGGTTGTAG  
CTGGCTCTTTTAGAGCATGTGCACGCCTGTTTGGACTTCATTTTCATCCACCTGTGCACC  
TATTGTAGTCTTTGGTTGGGTTAGGAGGAAGTGATCATTGTATCAGCATCTGCTGGGAGT  
GAGGACTTGCATTGTGAAAGCTTTGCTGTCCTTGATGTGATCATGGAATCTTTTCTCAC  
TAGAGTCTATGTCACCTATTATACTCTGTGCAATGTCATTGAATGTCTTTACATGGGCTT  
GTATGCCTATGAAAATTGTAATAACAACCTTTCAGCAACGGATCTCTTGGCTCTCGCATCGA  
TGAAGAACGCAGCGAAATGCGATAAGTAATGTGAATTGCAGAATTCAGTGAATCATCGAA  
TCTTTGAACGCATCTTGCCTCCTTGGTATTCCGAGGAGCATGCCTGTTTGAGTGTCAAT  
AAATTCTCAACTCTCTTATAC-TTTTTTGTAAGAGAGCTTGGACTGTGGAGGCTTGCT



GGCCACTTTTTGGGGTCAGCTCCTCTGAAATGCATTAGCGGAACCGTTTGCGATCTGCCA  
CAAGTGTGATAAGTTATCTACACTGGCGAGGGGATTGCTCTCTGTAATGTTGAGCTTCTA  
ATTGTCTCTACTTTGTGAGACTACTTTTGAATGCTTGACCTCAAATCAGGTAGGACTACC  
CGCTGAACTTAA

>ABC9-56

TTTCCGTAGGTGAACCTGCGGAAGGATCATTATTGAATTATGTTTCTAGATAGGTTGTAG  
CTGGCTCTTTTAGAGCATGTGCACGCCTGTTTGGACTTCATTTTCATCCACCTGTGCACC  
TATTGTAGTCTTTGGTTGGGTTAGGAGGAAGTGATCATTGTATCAGCATCTGCTGGGAGT  
GAGGACTTGCATTGTGAAAGCTTTGCTGTCCTTGATGTGATCATGGAATCTTTTCTCAC  
TAGAGTCTATGTCACTCATTATACTCTGTGCAATGTCATTGAATGTCTTTACATGGGCTT  
GTATGCCTATGAAAATTGTAATACTTTTTCAGCAACGGATCTCTTGGCTCTCGCATCGA  
TGAAGAACGCAGCGAAATGCGATAAGTAATGTGAATTGCAGAATTCAGTGAATCATCGAA  
TCTTTGAACGCATCTTGCGCTCCTTGGTATTCCGAGGAGCATGCCTGTTTGAGTGTGATT  
AAATTCTCAACTCTCTTATAC-TTTTTGTAAAAGAGAGCTTGGACTGTGGAGGCTTGCT  
GGCCACTTTTTGGGGTCAGCTCCTCTGAAATGCATTAGCGGAACCGTTTGCGATCTGCCA  
CAAGTGTGATAAGTTATCTACACTGGCGAGGGGATTGCTCTCTGTAATGTTGAGCTTCTA  
ATTGTCTCTACTTTGTGAGACTACTTTTGAATGCTTGACCTCAAATCAGGTAGGACTACC  
CGCTGAACTTAA

>ABC10-2

TTTCCGTAGGTGAACCTGCGGAAGGATCATTATTGAATTATGTTTCTAGATAGGTTGTAG  
CTGGCTCTTTTAGAGCATGTGCACGCCTGTTTGGACTTCATTTTCATCCACCTGTGCACC  
TATTGTAGTCTTTGGTTGGGTTAGGAGGAAGTGATCATTGTATCAGCATCTGCTGGGAGT  
GAGGACTTGCATTGTGAAAGCTTTGCTGTCCTTGATGTGATCATGGAATCTTTTCTCAC  
TAGAGTCTATGTCACTCATTATACTCTGTGCAATGTCATTGAATGTCTTTACATGGGCTT  
GTATGCCTATGAAAATTGTAATACTTTTTCAGCAACGGATCTCTTGGCTCTCGCATCGA  
TGAAGAACGCAGCGAAATGCGATAAGTAATGTGAATTGCAGAATTCAGTGAATCATCGAA  
TCTTTGAACGCATCTTGCGCTCCTTGGTATTCCGAGGAGCATGCCTGTTTGAGTGTGATT  
AAATTCTCAACTCTCTTATAC-TTTTTGTAAAAGAGAGCTTGGACTGTGGAGGCTTGCT  
GGCCACTTTTTGGGGTCAGCTCCTCTGAAATGCATTAGCGGAACCGTTTGCGATCTGCCA  
CAAGTGTGATAAGTTATCTACACTGGCGAGGGGATTGCTCTCTGTAATGTTGAGCTTCTA  
ATTGTCTCTACTTTGTGAGACTACTTTTGAATGCTTGACCTCAAATCAGGTAGGACTACC  
CGCTGAACTTAA

>ABC10-3

TTTCCGTAGGTGAACCTGCGGAAGGATCATTATTGAATTATGTTTCTAGATAGGTTGTAG  
CTGGCTCTTTTAGAGCATGTGCACGCCTGTTTGGACTTCATTTTCATCCACCTGTGCACC  
TATTGTAGTCTTTGGTTGGGTTAGGAGGAAGTGATCATTGTATCAGCATCTGCTGGGAGT  
GAGGACTTGCATTGTGAAAGCTTTGCTGTCCTTGATGTGATCATGGAATCTTTTCTCAC  
TAGAGTCTATGTCACTCATTATACTCTGTGCAATGTCATTGAATGTCTTTACATGGGCTT  
GTATGCCTATGAAAATTGTAATACTTTTTCAGCAACGGATCTCTTGGCTCTCGCATCGA  
TGAAGAACGCAGCGAAATGCGATAAGTAATGTGAATTGCAGAATTCAGTGAATCATCGAA  
TCTTTGAACGCATCTTGCGCTCCTTGGTATTCCGAGGAGCATGCCTGTTTGAGTGTGATT  
AAATTCTCAACTCTCTTATAC-TTTTTGTAAAAGAGAGCTTGGACTGTGGAGGCTTGCT  
GGCCACTTTTTGGGGTCAGCTCCTCTGAAATGCATTAGCGGAACCGTTTGCGATCTGCCA  
CAAGTGTGATAAGTTATCTACACTGGCGAGGGGATTGCTCTCTGTAATGTTGAGCTTCTA  
ATTGTCTCTACTTTGTGAGACTACTTTTGAATGCTTGACCTCAAATCAGGTAGGACTACC  
CGCTGAACTTAA

>ABC10-4

TTTCCGTAGGTGAACCTGCGGAAGGATCATTATTGAATTATGTTTCTAGATAGGTTGTAG  
CTGGCTCTTTTAGAGCATGTGCACGCCTGTTTGGACTTCATTTTCATCCACCTGTGCACC  
TATTGTAGTCTTTGGTTGGGTTAGGAGGAAGTGATCATTGTATCAGCATCTGCTGGGAGT



GAGGACTTGCATTGTGAAAGCTTTGCTGTCCTTGATGTGATCATGGAATCTTTTTCTCAC  
TAGAGTCTATGTCACCTATTATACTCTGTGCAATGTCATTGAATGTCTTTACATGGGCTT  
GTATGCCTATGAAAATTGTAATACAACCTTTCAGCAACGGATCTCTTGGCTCTCGCATCGA  
TGAAGAACGCAGCGAAATGCGATAAGTAATGTGAATTGCAGAATTCAGTGAATCATCGAA  
TCTTTGAACGCATCTTGCGCTCCTTGGTATTCCGAGGAGCATGCCTGTTTGAGTGTGATT  
AAATTCTCAACTCTCTTATAC-TTTTTGTAAAAGAGAGCTTGGACTGTGGAGGCTTGCT  
GGCCACTTTTTGGGGTCAGCTCCTCTGAAATGCATTAGCGGAACCGTTTGCGATCTGCCA  
CAAGTGTGATAAGTTATCTACACTGGCGAGGGGATTGCTCTCTGTAATGTTTCACTTCTA  
ATTGTCTCTACTTTGTGAGACTACTTTTGAATGCTTGACCTCAAATCAGGTAGGACTACC  
CGCTGAACTTAA

>ABC10-5

TTTCCGTAGGTGAACCTGCGGAAGGATCATTATTGAATTATGTTTCTAGATAGGTTGTAG  
CTGGCTCTTTTAGAGCATGTGCACGCCTGTTTGGACTTCATTTTCATCCACCTGTGCACC  
TATTGTAGTCTTTGGTTGGGTTAGGAGGAAGTGATCATTGTATCAGCATCTGCTGGGAGT  
GAGGACTTGCATTGTGAAAGCTTTGCTGTCCTTGATGTGATCATGGAATCTTTTTCTCAC  
TAGAGTCTATGTCACCTATTATACTCTGTGCAATGTCATTGAATGTCTTTACATGGGCTT  
GTATGCCTATGAAAATTGTAATACAACCTTTCAGCAACGGATCTCTTGGCTCTCGCATCGA  
TGAAGAACGCAGCGAAATGCGATAAGTAATGTGAATTGCAGAATTCAGTGAATCATCGAA  
TCTTTGAACGCATCTTGCGCTCCTTGGTATTCCGAGGAGCATGCCTGTTTGAGTGTGATT  
AAATTCTCAACTCTCTTATAC-TTTTTGTAAAAGAGAGCTTGGACTGTGGAGGCTTGCT  
GGCCACTTTTTGGGGTCAGCTCCTCTGAAATGCATTAGCGGAACCGTTTGCGATCTGCCA  
CAAGTGTGATAAGTTATCTACACTGGCGAGGGGATTGCTCTCTGTAATGTTTCACTTCTA  
ATTGTCTCTACTTTGTGAGACTACTTTTGAATGCTTGACCTCAAATCAGGTAGGACTACC  
CGCTGAACTTAA

>ABC10-10

TTTCCGTAGGTGAACCTGCGGAAGGATCATTATTGAATTATGTTTCTAGATAGGTTGTAG  
CTGGCTCTTTTAGAGCATGTGCACGCCTGTTTGGACTTCATTTTCATCCACCTGTGCACC  
TATTGTAGTCTTTGGTTGGGTTAGGAGGAAGTGATCATTGTATCAGCATCTGCTGGGAGT  
GAGGACTTGCATTGTGAAAGCTTTGCTGTCCTTGATGTGATCATGGAATCTTTTTCTCAC  
TAGAGTCTATGTCACCTATTATACTCTGTGCAATGTCATTGAATGTCTTTACATGGGCTT  
GTATGCCTATGAAAATTGTAATACAACCTTTCAGCAACGGATCTCTTGGCTCTCGCATCGA  
TGAAGAACGCAGCGAAATGCGATAAGTAATGTGAATTGCAGAATTCAGTGAATCATCGAA  
TCTTTGAACGCATCTTGCGCTCCTTGGTATTCCGAGGAGCATGCCTGTTTGAGTGTGATT  
AAATTCTCAACTCTCTTATAC-TTTTTGTAAAAGAGAGCTTGGACTGTGGAGGCTTGCT  
GGCCACTTTTTGGGGTCAGCTCCTCTGAAATGCATTAGCGGAACCGTTTGCGATCTGCCA  
CAAGTGTGATAAGTTATCTACACTGGCGAGGGGATTGCTCTCTGTAATGTTTCACTTCTA  
ATTGTCTCTACTTTGTGAGACTACTTTTGAATGCTTGACCTCAAATCAGGTAGGACTACC  
CGCTGAACTTAA

>ABC10-12

TTTCCGTAGGTGAACCTGCGGAAGGATCATTATTGAATTATGTTTCTAGATAGGTTGTAG  
CTGGCTCTTTTAGAGCATGTGCACGCCTGTTTGGACTTCATTTTCATCCACCTGTGCACC  
TATTGTAGTCTTTGGTTGGGTTAGGAGGAAGTGATCATTGTATCAGCATCTGCTGGGAGT  
GAGGACTTGCATTGTGAAAGCTTTGCTGTCCTTGATGTGATCATGGAATCTTTTTCTCAC  
TAGAGTCTATGTCACCTATTATACTCTGTGCAATGTCATTGAATGTCTTTACATGGGCTT  
GTATGCCTATGAAAATTGTAATACAACCTTTCAGCAACGGATCTCTTGGCTCTCGCATCGA  
TGAAGAACGCAGCGAAATGCGATAAGTAATGTGAATTGCAGAATTCAGTGAATCATCGAA  
TCTTTGAACGCATCTTGCGCTCCTTGGTATTCCGAGGAGCATGCCTGTTTGAGTGTGATT  
AAATTCTCAACTCTCTTATAC-TTTTTGTAAAAGAGAGCTTGGACTGTGGAGGCTTGCT  
GGCCACTTTTTGGGGTCAGCTCCTCTGAAATGCATTAGCGGAACCGTTTGCGATCTGCCA  
CAAGTGTGATAAGTTATCTACACTGGCGAGGGGATTGCTCTCTGTAATGTTTCACTTCTA



ATTGTCTCTACTTTGTGAGACTACTTTTGAATGCTTGACCTCAAATCAGGTAGGACTACC  
CGCTGAACTTAA

>ABC10-18

TTTCCGTAGGTGAACCTGCGGAAGGATCATTATTGAATTATGTTTCTAGATAGGTTGTAG  
CTGGCTCTTTTAGAGCATGTGCACGCCTGTTTGGACTTCATTTTCATCCACCTGTGCACC  
TATTGTAGTCTTTGGTTGGGTTAGGAGGAAGTGATCATTGTATCAGCATCTGCTGGGAGT  
GAGGACTTGCATTGTGAAAGCTTTGCTGTCCTTGATGTGATCATGGAATCTTTTTCTCAC  
TAGAGTCTATGTCACCTATTATACTCTGTGCAATGTCATTGAATGTCTTTACATGGGCTT  
GTATGCCTATGAAAATTGTAATAACAACCTTTCAGCAACGGATCTCTTGGCTCTCGCATCGA  
TGAAGAACGCAGCGAAATGCGATAAGTAATGTGAATTGCAGAATTCAGTGAATCATCGAA  
TCTTTGAACGCATCTTGGCTCCTTGGTATTCCGAGGAGCATGCCTGTTTGAGTGTCAAT  
AAATTCTCAACTCTCTTATAC-TTTTTGTAAAAGAGAGCTTGGACTGTGGAGGCTTGCT  
GGCCACTTTTTGGGGTCAGCTCCTCTGAAATGCATTAGCGGAACCGTTTGCGATCTGCCA  
CAAGTGTGATAAGTTATCTACACTGGCGAGGGGATTGCTCTCTGTAATGTTTCAGCTTCTA  
ATTGTCTCTACTTTGTGAGACTACTTTTGAATGCTTGACCTCAAATCAGGTAGGACTACC  
CGCTGAACTTAA

>ABC10-36

TTTCCGTAGGTGAACCTGCGGAAGGATCATTATTGAATTATGTTTCTAGATAGGTTGTAG  
CTGGCTCTTTTAGAGCATGTGCACGCCTGTTTGGACTTCATTTTCATCCACCTGTGCACC  
TATTGTAGTCTTTGGTTGGGTTAGGAGGAAGTGATCATTGTATCAGCATCTGCTGGGAGT  
GAGGACTTGCATTGTGAAAGCTTTGCTGTCCTTGATGTGATCATGGAATCTTTTTCTCAC  
TAGAGTCTATGTCACCTATTATACTCTGTGCAATGTCATTGAATGTCTTTACATGGGCTT  
GTATGCCTATGAAAATTGTAATAACAACCTTTCAGCAACGGATCTCTTGGCTCTCGCATCGA  
TGAAGAACGCAGCGAAATGCGATAAGTAATGTGAATTGCAGAATTCAGTGAATCATCGAA  
TCTTTGAACGCATCTTGGCTCCTTGGTATTCCGAGGAGCATGCCTGTTTGAGTGTCAAT  
AAATTCTCAACTCTCTTATAC-TTTTTGTAAAAGAGAGCTTGGACTGTGGAGGCTTGCT  
GGCCACTTTTTGGGGTCAGCTCCTCTGAAATGCATTAGCGGAACCGTTTGCGATCTGCCA  
CAAGTGTGATAAGTTATCTACACTGGCGAGGGGATTGCTCTCTGTAATGTTTCAGCTTCTA  
ATTGTCTCTACTTTGTGAGACTACTTTTGAATGCTTGACCTCAAATCAGGTAGGACTACC  
CGCTGAACTTAA

>ABC10-38

TTTCCGTAGGTGAACCTGCGGAAGGATCATTATTGAATTATGTTTCTAGATAGGTTGTAG  
CTGGCTCTTTTAGAGCATGTGCACGCCTGTTTGGACTTCATTTTCATCCACCTGTGCACC  
TATTGTAGTCTTTGGTTGGGTTAGGAGGAAGTGATCATTGTATCAGCATCTGCTGGGAGT  
GAGGACTTGCATTGTGAAAGCTTTGCTGTCCTTGATGTGATCATGGAATCTTTTTCTCAC  
TAGAGTCTATGTCACCTATTATACTCTGTGCAATGTCATTGAATGTCTTTACATGGGCTT  
GTATGCCTATGAAAATTGTAATAACAACCTTTCAGCAACGGATCTCTTGGCTCTCGCATCGA  
TGAAGAACGCAGCGAAATGCGATAAGTAATGTGAATTGCAGAATTCAGTGAATCATCGAA  
TCTTTGAACGCATCTTGGCTCCTTGGTATTCCGAGGAGCATGCCTGTTTGAGTGTCAAT  
AAATTCTCAACTCTCTTATAC-TTTTTGTAAAAGAGAGCTTGGACTGTGGAGGCTTGCT  
GGCCACTTTTTGGGGTCAGCTCCTCTGAAATGCATTAGCGGAACCGTTTGCGATCTGCCA  
CAAGTGTGATAAGTTATCTACACTGGCGAGGGGATTGCTCTCTGTAATGTTTCAGCTTCTA  
ATTGTCTCTACTTTGTGAGACTACTTTTGAATGCTTGACCTCAAATCAGGTAGGACTACC  
CGCTGAACTTAA

>ABC10-44

TTTCCGTAGGTGAACCTGCGGAAGGATCATTATTGAATTATGTTTCTAGATAGGTTGTAG  
CTGGCTCTTTTAGAGCATGTGCACGCCTGTTTGGACTTCATTTTCATCCACCTGTGCACC  
TATTGTAGTCTTTGGTTGGGTTAGGAGGAAGTGATCATTGTATCAGCATCTGCTGGGAGT  
GAGGACTTGCATTGTGAAAGCTTTGCTGTCCTTGATGTGATCATGGAATCTTTTTCTCAC  
TAGAGTCTATGTCACCTATTATACTCTGTGCAATGTCATTGAATGTCTTTACATGGGCTT



GTATGCCTATGAAAATTGTAATACAACCTTTTCAGCAACGGATCTCTTGGCTCTCGCATCGA  
TGAAGAACGCAGCGAAATGCGATAAGTAATGTGAATTGCAGAATTCAGTGAATCATCGAA  
TCTTTGAACGCATCTTGCCTCCTTGGTATTCCGAGGAGCATGCCTGTTTGAGTGTCAAT  
AAATTCTCAACTCTCTTATAC-TTTTTTGAAAAGAGAGCTTGGACTGTGGAGGCTTGCT  
GGCCACTTTTTGGGGTCAGCTCCTCTGAAATGCATTAGCGGAACCGTTTGCGATCTGCCA  
CAAGTGTGATAAGTTATCTACACTGGCGAGGGGATTGCTCTCTGTAATGTTTCAGCTTCTA  
ATTGTCTCTACTTTGTGAGACTACTTTTGAATGCTTGACCTCAAATCAGGTAGGACTACC  
CGCTGAACTTAA

>ABC10-46

TTTCCGTAGGTGAACCTGCGGAAGGATCATTATTGAATTATGTTTCTAGATAGGTTGTAG  
CTGGCTCTTTTAGAGCATGTGCACGCCTGTTTGGACTTCATTTTCATCCACCTGTGCACC  
TATTGTAGTCTTTGGTTGGGTTAGGAGGAAGTGATCATTGTATCAGCATCTGCTGGGAGT  
GAGGACTTGCATTGTGAAAGCTTTGCTGTCCTTGATGTGATCATGGAATCTTTTTCTCAC  
TAGAGTCTATGTCACCTCATTATACTCTGTCTGAATGTCATTGAATGTCTTTACATGGGCTT  
GTATGCCTATGAAAATTGTAATACAACCTTTTCAGCAACGGATCTCTTGGCTCTCGCATCGA  
TGAAGAACGCAGCGAAATGCGATAAGTAATGTGAATTGCAGAATTCAGTGAATCATCGAA  
TCTTTGAACGCATCTTGCCTCCTTGGTATTCCGAGGAGCATGCCTGTTTGAGTGTCAAT  
AAATTCTCAACTCTCTTATAC-TTTTTTGAAAAGAGAGCTTGGACTGTGGAGGCTTGCT  
GGCCACTTTTTGGGGTCAGCTCCTCTGAAATGCATTAGCGGAACCGTTTGCGATCTGCCA  
CAAGTGTGATAAGTTATCTACACTGGCGAGGGGATTGCTCTCTGTAATGTTTCAGCTTCTA  
ATTGTCTCTACTTTGTGAGACTACTTTTGAATGCTTGACCTCAAATCAGGTAGGACTACC  
CGCTGAACTTAA

>ABC11-1

TTTCCGTAGGTGAACCTGCGGAAGGATCATTATTGAATTATGTTTCTAGATAGGTTGTAG  
CTGGCTCTTTTAGAGCATGTGCACGCCTGTTTGGACTTCATTTTCATCCACCTGTGCACC  
TATTGTAGTCTTTGGTTGGGTTAGGAGGAAGTGATCATTGTATCAGCATCTGCTGGGAGT  
GAGGACTTGCATTGTGAAAGCTTTGCTGTCCTTGATGTGATCATGGAATCTTTTTCTCAC  
TAGAGTCTATGTCACCTCATTATACTCTGTCTGAATGTCATTGAATGTCTTTACATGGGCTT  
GTATGCCTATGAAAATTGTAATACAACCTTTTCAGCAACGGATCTCTTGGCTCTCGCATCGA  
TGAAGAACGCAGCGAAATGCGATAAGTAATGTGAATTGCAGAATTCAGTGAATCATCGAA  
TCTTTGAACGCATCTTGCCTCCTTGGTATTCCGAGGAGCATGCCTGTTTGAGTGTCAAT  
AAATTCTCAACTCTCTTATAC-TTTTTTGAAAAGAGAGCTTGGACTGTGGAGGCTTGCT  
GGCCACTTTTTGGGGTCAGCTCCTCTGAAATGCATTAGCGGAACCGTTTGCGATCTGCCA  
CAAGTGTGATAAGTTATCTACACTGGCGAGGGGATTGCTCTCTGTAATGTTTCAGCTTCTA  
ATTGTCTCTACTTTGTGAGACTACTTTTGAATGCTTGACCTCAAATCAGGTAGGACTACC  
CGCTGAACTTAA

>ABC11-2

TTTCCGTAGGTGAACCTGCGGAAGGATCATTATTGAATTATGTTTCTAGATAGGTTGTAG  
CTGGCTCTTTTAGAGCATGTGCACGCCTGTTTGGACTTCATTTTCATCCACCTGTGCACC  
TATTGTAGTCTTTGGTTGGGTTAGGAGGAAGTGATCATTGTATCAGCATCTGCTGGGAGT  
GAGGACTTGCATTGTGAAAGCTTTGCTGTCCTTGATGTGATCATGGAATCTTTTTCTCAC  
TAGAGTCTATGTCACCTCATTATACTCTGTCTGAATGTCATTGAATGTCTTTACATGGGCTT  
GTATGCCTATGAAAATTGTAATACAACCTTTTCAGCAACGGATCTCTTGGCTCTCGCATCGA  
TGAAGAACGCAGCGAAATGCGATAAGTAATGTGAATTGCAGAATTCAGTGAATCATCGAA  
TCTTTGAACGCATCTTGCCTCCTTGGTATTCCGAGGAGCATGCCTGTTTGAGTGTCAAT  
AAATTCTCAACTCTCTTATAC-TTTTTTGAAAAGAGAGCTTGGACTGTGGAGGCTTGCT  
GGCCACTTTTTGGGGTCAGCTCCTCTGAAATGCATTAGCGGAACCGTTTGCGATCTGCCA  
CAAGTGTGATAAGTTATCTACACTGGCGAGGGGATTGCTCTCTGTAATGTTTCAGCTTCTA  
ATTGTCTCTACTTTGTGAGACTACTTTTGAATGCTTGACCTCAAATCAGGTAGGACTACC  
CGCTGAACTTAA



>ABC11-4

TTTCCGTAGGTGAACCTGCGGAAGGATCATTATTGAATTATGTTTCTAGATAGGTTGTAG  
CTGGCTCTTTTAGAGCATGTGCACGCCTGTTTGGACTTCATTTTCATCCACCTGTGCACC  
TATTGTAGTCTTTGGTTGGGTTAGGAGGAAGTGATCATTGTATCAGCATCTGCTGGGAGT  
GAGGACTTGCATTGTGAAAGCTTTGCTGTCCTTGATGTGATCATGGAATCTTTTTCTCAC  
TAGAGTCTATGTCACCTCATTATACTCTGTGCAATGTCATTGAATGTCTTTACATGGGCTT  
GTATGCCTATGAAAATTGTAATACAACCTTTCAGCAACGGATCTCTTGGCTCTCGCATCGA  
TGAAGAACGCAGCGAAATGCGATAAGTAATGTGAATTGCAGAATTCAGTGAATCATCGAA  
TCTTTGAACGCATCTTGCCTCCTTGGTATTCCGAGGAGCATGCCTGTTTGAGTGTCATT  
AAATTCTCAACTCTCTTATAC-TTTTTGTAAAAGAGAGCTTGGACTGTGGAGGCTTGCT  
GGCCACTTTTTGGGGTCAGCTCCTCTGAAATGCATTAGCGGAACCGTTTGCGATCTGCCA  
CAAGTGTGATAAGTTATCTACACTGGCGAGGGGATTGCTCTCTGTAATGTTTCAGCTTCTA  
ATTGTCTCTACTTTGTGAGACTACTTTTGAATGCTTGACCTCAAATCAGGTAGGACTACC  
CGCTGAACTTAA

>ABC11-6

TTTCCGTAGGTGAACCTGCGGAAGGATCATTATTGAATTATGTTTCTAGATAGGTTGTAG  
CTGGCTCTTTTAGAGCATGTGCACGCCTGTTTGGACTTCATTTTCATCCACCTGTGCACC  
TATTGTAGTCTTTGGTTGGGTTAGGAGGAAGTGATCATTGTATCAGCATCTGCTGGGAGT  
GAGGACTTGCATTGTGAAAGCTTTGCTGTCCTTGATGTGATCATGGAATCTTTTTCTCAC  
TAGAGTCTATGTCACCTCATTATACTCTGTGCAATGTCATTGAATGTCTTTACATGGGCTT  
GTATGCCTATGAAAATTGTAATACAACCTTTCAGCAACGGATCTCTTGGCTCTCGCATCGA  
TGAAGAACGCAGCGAAATGCGATAAGTAATGTGAATTGCAGAATTCAGTGAATCATCGAA  
TCTTTGAACGCATCTTGCCTCCTTGGTATTCCGAGGAGCATGCCTGTTTGAGTGTCATT  
AAATTCTCAACTCTCTTATAC-TTTTTGTAAAAGAGAGCTTGGACTGTGGAGGCTTGCT  
GGCCACTTTTTGGGGTCAGCTCCTCTGAAATGCATTAGCGGAACCGTTTGCGATCTGCCA  
CAAGTGTGATAAGTTATCTACACTGGCGAGGGGATTGCTCTCTGTAATGTTTCAGCTTCTA  
ATTGTCTCTACTTTGTGAGACTACTTTTGAATGCTTGACCTCAAATCAGGTAGGACTACC  
CGCTGAACTTAA

>ABC11-26

TTTCCGTAGGTGAACCTGCGGAAGGATCATTATTGAATTATGTTTCTAGATAGGTTGTAG  
CTGGCTCTTTTAGAGCATGTGCACGCCTGTTTGGACTTCATTTTCATCCACCTGTGCACC  
TATTGTAGTCTTTGGTTGGGTTAGGAGGAAGTGATCATTGTATCAGCATCTGCTGGGAGT  
GAGGACTTGCATTGTGAAAGCTTTGCTGTCCTTGATGTGATCATGGAATCTTTTTCTCAC  
TAGAGTCTATGTCACCTCATTATACTCTGTGCAATGTCATTGAATGTCTTTACATGGGCTT  
GTATGCCTATGAAAATTGTAATACAACCTTTCAGCAACGGATCTCTTGGCTCTCGCATCGA  
TGAAGAACGCAGCGAAATGCGATAAGTAATGTGAATTGCAGAATTCAGTGAATCATCGAA  
TCTTTGAACGCATCTTGCCTCCTTGGTATTCCGAGGAGCATGCCTGTTTGAGTGTCATT  
AAATTCTCAACTCTCTTATAC-TTTTTGTAAAAGAGAGCTTGGACTGTGGAGGCTTGCT  
GGCCACTTTTTGGGGTCAGCTCCTCTGAAATGCATTAGCGGAACCGTTTGCGATCTGCCA  
CAAGTGTGATAAGTTATCTACACTGGCGAGGGGATTGCTCTCTGTAATGTTTCAGCTTCTA  
ATTGTCTCTACTTTGTGAGACTACTTTTGAATGCTTGACCTCAAATCAGGTAGGACTACC  
CGCTGAACTTAA

>ABC11-27

TTTCCGTAGGTGAACCTGCGGAAGGATCATTATTGAATTATGTTTCTAGATAGGTTGTAG  
CTGGCTCTTTTAGAGCATGTGCACGCCTGTTTGGACTTCATTTTCATCCACCTGTGCACC  
TATTGTAGTCTTTGGTTGGGTTAGGAGGAAGTGATCATTGTATCAGCATCTGCTGGGAGT  
GAGGACTTGCATTGTGAAAGCTTTGCTGTCCTTGATGTGATCATGGAATCTTTTTCTCAC  
TAGAGTCTATGTCACCTCATTATACTCTGTGCAATGTCATTGAATGTCTTTACATGGGCTT  
GTATGCCTATGAAAATTGTAATACAACCTTTCAGCAACGGATCTCTTGGCTCTCGCATCGA  
TGAAGAACGCAGCGAAATGCGATAAGTAATGTGAATTGCAGAATTCAGTGAATCATCGAA



TCTTTGAACGCATCTTGCGCTCCTTGGTATTCCGAGGAGCATGCCTGTTTGAGTGTCAATT  
AAATTCTCAACTCTCTTATAC-TTTTTGTAAAAGAGAGCTTGGACTGTGGAGGCTTGCT  
GGCCACTTTTTGGGGTCAGCTCCTCTGAAATGCATTAGCGGAACCGTTTGCGATCTGCCA  
CAAGTGTGATAAGTTATCTACACTGGCGAGGGGATTGCTCTCTGTAATGTTGAGCTTCTA  
ATTGTCTCTACTTTGTGAGACTACTTTTGAATGCTTGACCTCAAATCAGGTAGGACTACC  
CGCTGAACTTAA

>ABC11-30

TTTCCGTAGGTGAACCTGCGGAAGGATCATTATTGAATTATGTTTCTAGATAGGTTGTAG  
CTGGCTCTTTTAGAGCATGTGCACGCCTGTTTGGACTTCATTTTCATCCACCTGTGCACC  
TATTGTAGTCTTTGGTTGGGTTAGGAGGAAGTGATCATTGTATCAGCATCTGCTGGGAGT  
GAGGACTTGCAATTGTGAAAGCTTTGCTGTCTTGATGTGATCATGGAATCTTTTCTCAC  
TAGAGTCTATGTCACTCATTATACTCTGTGCAATGTCATTGAATGTCTTTACATGGGCTT  
GTATGCCTATGAAAATTGTAATACAACCTTTCAGCAACGGATCTCTTGGCTCTCGCATCGA  
TGAAGAACGCAGCGAAATGCGATAAGTAATGTGAATTGCAGAATTCAGTGAATCATCGAA  
TCTTTGAACGCATCTTGCGCTCCTTGGTATTCCGAGGAGCATGCCTGTTTGAGTGTCAATT  
AAATTCTCAACTCTCTTATAC-TTTTTGTAAAAGAGAGCTTGGACTGTGGAGGCTTGCT  
GGCCACTTTTTGGGGTCAGCTCCTCTGAAATGCATTAGCGGAACCGTTTGCGATCTGCCA  
CAAGTGTGATAAGTTATCTACACTGGCGAGGGGATTGCTCTCTGTAATGTTGAGCTTCTA  
ATTGTCTCTACTTTGTGAGACTACTTTTGAATGCTTGACCTCAAATCAGGTAGGACTACC  
CGCTGAACTTAA

>ABC11-31

TTTCCGTAGGTGAACCTGCGGAAGGATCATTATTGAATTATGTTTCTAGATAGGTTGTAG  
CTGGCTCTTTTAGAGCATGTGCACGCCTGTTTGGACTTCATTTTCATCCACCTGTGCACC  
TATTGTAGTCTTTGGTTGGGTTAGGAGGAAGTGATCATTGTATCAGCATCTGCTGGGAGT  
GAGGACTTGCAATTGTGAAAGCTTTGCTGTCTTGATGTGATCATGGAATCTTTTCTCAC  
TAGAGTCTATGTCACTCATTATACTCTGTGCAATGTCATTGAATGTCTTTACATGGGCTT  
GTATGCCTATGAAAATTGTAATACAACCTTTCAGCAACGGATCTCTTGGCTCTCGCATCGA  
TGAAGAACGCAGCGAAATGCGATAAGTAATGTGAATTGCAGAATTCAGTGAATCATCGAA  
TCTTTGAACGCATCTTGCGCTCCTTGGTATTCCGAGGAGCATGCCTGTTTGAGTGTCAATT  
AAATTCTCAACTCTCTTATAC-TTTTTGTAAAAGAGAGCTTGGACTGTGGAGGCTTGCT  
GGCCACTTTTTGGGGTCAGCTCCTCTGAAATGCATTAGCGGAACCGTTTGCGATCTGCCA  
CAAGTGTGATAAGTTATCTACACTGGCGAGGGGATTGCTCTCTGTAATGTTGAGCTTCTA  
ATTGTCTCTACTTTGTGAGACTACTTTTGAATGCTTGACCTCAAATCAGGTAGGACTACC  
CGCTGAACTTAA

>ABC11-33

TTTCCGTAGGTGAACCTGCGGAAGGATCATTATTGAATTATGTTTCTAGATAGGTTGTAG  
CTGGCTCTTTTAGAGCATGTGCACGCCTGTTTGGACTTCATTTTCATCCACCTGTGCACC  
TATTGTAGTCTTTGGTTGGGTTAGGAGGAAGTGATCATTGTATCAGCATCTGCTGGGAGT  
GAGGACTTGCAATTGTGAAAGCTTTGCTGTCTTGATGTGATCATGGAATCTTTTCTCAC  
TAGAGTCTATGTCACTCATTATACTCTGTGCAATGTCATTGAATGTCTTTACATGGGCTT  
GTATGCCTATGAAAATTGTAATACAACCTTTCAGCAACGGATCTCTTGGCTCTCGCATCGA  
TGAAGAACGCAGCGAAATGCGATAAGTAATGTGAATTGCAGAATTCAGTGAATCATCGAA  
TCTTTGAACGCATCTTGCGCTCCTTGGTATTCCGAGGAGCATGCCTGTTTGAGTGTCAATT  
AAATTCTCAACTCTCTTATAC-TTTTTGTAAAAGAGAGCTTGGACTGTGGAGGCTTGCT  
GGCCACTTTTTGGGGTCAGCTCCTCTGAAATGCATTAGCGGAACCGTTTGCGATCTGCCA  
CAAGTGTGATAAGTTATCTACACTGGCGAGGGGATTGCTCTCTGTAATGTTGAGCTTCTA  
ATTGTCTCTACTTTGTGAGACTACTTTTGAATGCTTGACCTCAAATCAGGTAGGACTACC  
CGCTGAACTTAA

>ABC11-37

TTTCCGTAGGTGAACCTGCGGAAGGATCATTATTGAATTATGTTTCTAGATAGGTTGTAG



CTGGCTCTTTTAGAGCATGTGCACGCCTGTTTGGACTTCATTTTCATCCACCTGTGCACC  
TATTGTAGTCTTTGGTTGGGTTAGGAGGAAGTGATCATTGTATCAGCATCTGCTGGGAGT  
GAGGACTTGCATTGTGAAAGCTTTGCTGTCCTTGATGTGATCATGGAATCTTTTCTCAC  
TAGAGTCTATGTCACCTATTATACTCTGTGCAATGTCATTGAATGTCTTTACATGGGCTT  
GTATGCCTATGAAAATTGTAATACAACCTTTCAGCAACGGATCTCTTGGCTCTCGCATCGA  
TGAAGAACGCAGCGAAATGCGATAAGTAATGTGAATTGCAGAATTCAGTGAATCATCGAA  
TCTTTGAACGCATCTTGCCTCCTTGGTATTCCGAGGAGCATGCCTGTTTGAGTGTCAAT  
AAATTCTCAACTCTCTTATAC-TTTTTTGTAAGAGAGCTTGGACTGTGGAGGCTTGCT  
GGCCACTTTTTGGGGTCAGCTCCTCTGAAATGCATTAGCGGAACCGTTTGCGATCTGCCA  
CAAGTGTGATAAGTTATCTACACTGGCGAGGGGATTGCTCTCTGTAATGTTGAGCTTCTA  
ATTGTCTCTACTTTGTGAGACTACTTTTGAATGCTTGACCTCAAATCAGGTAGGACTACC  
CGCTGAACTTAA

>ABC11-49

TTTCCGTAGGTGAACCTGCGGAAGGATCATTATTGAATTATGTTTCTAGATAGGTTGTAG  
CTGGCTCTTTTAGAGCATGTGCACGCCTGTTTGGACTTCATTTTCATCCACCTGTGCACC  
TATTGTAGTCTTTGGTTGGGTTAGGAGGAAGTGATCATTGTATCAGCATCTGCTGGGAGT  
GAGGACTTGCATTGTGAAAGCTTTGCTGTCCTTGATGTGATCATGGAATCTTTTCTCAC  
TAGAGTCTATGTCACCTATTATACTCTGTGCAATGTCATTGAATGTCTTTACATGGGCTT  
GTATGCCTATGAAAATTGTAATACAACCTTTCAGCAACGGATCTCTTGGCTCTCGCATCGA  
TGAAGAACGCAGCGAAATGCGATAAGTAATGTGAATTGCAGAATTCAGTGAATCATCGAA  
TCTTTGAACGCATCTTGCCTCCTTGGTATTCCGAGGAGCATGCCTGTTTGAGTGTCAAT  
AAATTCTCAACTCTCTTATAC-TTTTTTGTAAGAGAGCTTGGACTGTGGAGGCTTGCT  
GGCCACTTTTTGGGGTCAGCTCCTCTGAAATGCATTAGCGGAACCGTTTGCGATCTGCCA  
CAAGTGTGATAAGTTATCTACACTGGCGAGGGGATTGCTCTCTGTAATGTTGAGCTTCTA  
ATTGTCTCTACTTTGTGAGACTACTTTTGAATGCTTGACCTCAAATCAGGTAGGACTACC  
CGCTGAACTTAA

>ABC12-7

TTTCCGTAGGTGAACCTGCGGAAGGATCATTATTGAATTATGTTTCTAGATAGGTTGTAG  
CTGGCTCTTTTAGAGCATGTGCACGCCTGTTTGGACTTCATTTTCATCCACCTGTGCACC  
TATTGTAGTCTTTGGTTGGGTTAGGAGGAAGTGATCATTGTATCAGCATCTGCTGGGAGT  
GAGGACTTGCATTGTGAAAGCTTTGCTGTCCTTGATGTGATCATGGAATCTTTTCTCAC  
TAGAGTCTATGTCACCTATTATACTCTGTGCAATGTCATTGAATGTCTTTACATGGGCTT  
GTATGCCTATGAAAATTGTAATACAACCTTTCAGCAACGGATCTCTTGGCTCTCGCATCGA  
TGAAGAACGCAGCGAAATGCGATAAGTAATGTGAATTGCAGAATTCAGTGAATCATCGAA  
TCTTTGAACGCATCTTGCCTCCTTGGTATTCCGAGGAGCATGCCTGTTTGAGTGTCAAT  
AAATTCTCAACTCTCTTATAC-TTTTTTGTAAGAGAGCTTGGACTGTGGAGGCTTGCT  
GGCCACTTTTTGGGGTCAGCTCCTCTGAAATGCATTAGCGGAACCGTTTGCGATCTGCCA  
CAAGTGTGATAAGTTATCTACACTGGCGAGGGGATTGCTCTCTGTAATGTTGAGCTTCTA  
ATTGTCTCTACTTTGTGAGACTACTTTTGAATGCTTGACCTCAAATCAGGTAGGACTACC  
CGCTGAACTTAA

>ABC12-8

TTTCCGTAGGTGAACCTGCGGAAGGATCATTATTGAATTATGTTTCTAGATAGGTTGTAG  
CTGGCTCTTTTAGAGCATGTGCACGCCTGTTTGGACTTCATTTTCATCCACCTGTGCACC  
TATTGTAGTCTTTGGTTGGGTTAGGAGGAAGTGATCATTGTATCAGCATCTGCTGGGAGT  
GAGGACTTGCATTGTGAAAGCTTTGCTGTCCTTGATGTGATCATGGAATCTTTTCTCAC  
TAGAGTCTATGTCACCTATTATACTCTGTGCAATGTCATTGAATGTCTTTACATGGGCTT  
GTATGCCTATGAAAATTGTAATACAACCTTTCAGCAACGGATCTCTTGGCTCTCGCATCGA  
TGAAGAACGCAGCGAAATGCGATAAGTAATGTGAATTGCAGAATTCAGTGAATCATCGAA  
TCTTTGAACGCATCTTGCCTCCTTGGTATTCCGAGGAGCATGCCTGTTTGAGTGTCAAT  
AAATTCTCAACTCTCTTATAC-TTTTTTGTAAGAGAGCTTGGACTGTGGAGGCTTGCT



GGCCACTTTTTGGGGTCAGCTCCTCTGAAATGCATTAGCGGAACCGTTTGCGATCTGCCA  
CAAGTGTGATAAGTTATCTACACTGGCGAGGGGATTGCTCTCTGTAATGTTGAGCTTCTA  
ATTGTCTCTACTTTGTGAGACTACTTTTGAATGCTTGACCTCAAATCAGGTAGGACTACC  
CGCTGAACTTAA

>ABC12-10

TTTCCGTAGGTGAACCTGCGGAAGGATCATTATTGAATTATGTTTCTAGATAGGTTGTAG  
CTGGCTCTTTTAGAGCATGTGCACGCCTGTTTGGACTTCATTTTCATCCACCTGTGCACC  
TATTGTAGTCTTTGGTTGGGTTAGGAGGAAGTGATCATTGTATCAGCATCTGCTGGGAGT  
GAGGACTTGCATTGTGAAAGCTTTGCTGTCCTTGATGTGATCATGGAATCTTTTTCTCAC  
TAGAGTCTATGTCACTCATTATACTCTGTGCAATGTCATTGAATGTCTTTACATGGGCTT  
GTATGCCTATGAAAATTGTAATAACAACCTTTCAGCAACGGATCTCTTGGCTCTCGCATCGA  
TGAAGAACGCAGCGAAATGCGATAAGTAATGTGAATTGCAGAATTCAGTGAATCATCGAA  
TCTTTGAACGCATCTTGCGCTCCTTGGTATTCCGAGGAGCATGCCTGTTTGAGTGTCAAT  
AAATTCTCAACTCTCTTATAC-TTTTTGTAAAAGAGAGCTTGGACTGTGGAGGCTTGCT  
GGCCACTTTTTGGGGTCAGCTCCTCTGAAATGCATTAGCGGAACCGTTTGCGATCTGCCA  
CAAGTGTGATAAGTTATCTACACTGGCGAGGGGATTGCTCTCTGTAATGTTGAGCTTCTA  
ATTGTCTCTACTTTGTGAGACTACTTTTGAATGCTTGACCTCAAATCAGGTAGGACTACC  
CGCTGAACTTAA

>ABC12-11

TTTCCGTAGGTGAACCTGCGGAAGGATCATTATTGAATTATGTTTCTAGATAGGTTGTAG  
CTGGCTCTTTTAGAGCATGTGCACGCCTGTTTGGACTTCATTTTCATCCACCTGTGCACC  
TATTGTAGTCTTTGGTTGGGTTAGGAGGAAGTGATCATTGTATCAGCATCTGCTGGGAGT  
GAGGACTTGCATTGTGAAAGCTTTGCTGTCCTTGATGTGATCATGGAATCTTTTTCTCAC  
TAGAGTCTATGTCACTCATTATACTCTGTGCAATGTCATTGAATGTCTTTACATGGGCTT  
GTATGCCTATGAAAATTGTAATAACAACCTTTCAGCAACGGATCTCTTGGCTCTCGCATCGA  
TGAAGAACGCAGCGAAATGCGATAAGTAATGTGAATTGCAGAATTCAGTGAATCATCGAA  
TCTTTGAACGCATCTTGCGCTCCTTGGTATTCCGAGGAGCATGCCTGTTTGAGTGTCAAT  
AAATTCTCAACTCTCTTATAC-TTTTTGTAAAAGAGAGCTTGGACTGTGGAGGCTTGCT  
GGCCACTTTTTGGGGTCAGCTCCTCTGAAATGCATTAGCGGAACCGTTTGCGATCTGCCA  
CAAGTGTGATAAGTTATCTACACTGGCGAGGGGATTGCTCTCTGTAATGTTGAGCTTCTA  
ATTGTCTCTACTTTGTGAGACTACTTTTGAATGCTTGACCTCAAATCAGGTAGGACTACC  
CGCTGAACTTAA

>ABC12-12

TTTCCGTAGGTGAACCTGCGGAAGGATCATTATTGAATTATGTTTCTAGATAGGTTGTAG  
CTGGCTCTTTTAGAGCATGTGCACGCCTGTTTGGACTTCATTTTCATCCACCTGTGCACC  
TATTGTAGTCTTTGGTTGGGTTAGGAGGAAGTGATCATTGTATCAGCATCTGCTGGGAGT  
GAGGACTTGCATTGTGAAAGCTTTGCTGTCCTTGATGTGATCATGGAATCTTTTTCTCAC  
TAGAGTCTATGTCACTCATTATACTCTGTGCAATGTCATTGAATGTCTTTACATGGGCTT  
GTATGCCTATGAAAATTGTAATAACAACCTTTCAGCAACGGATCTCTTGGCTCTCGCATCGA  
TGAAGAACGCAGCGAAATGCGATAAGTAATGTGAATTGCAGAATTCAGTGAATCATCGAA  
TCTTTGAACGCATCTTGCGCTCCTTGGTATTCCGAGGAGCATGCCTGTTTGAGTGTCAAT  
AAATTCTCAACTCTCTTATAC-TTTTTGTAAAAGAGAGCTTGGACTGTGGAGGCTTGCT  
GGCCACTTTTTGGGGTCAGCTCCTCTGAAATGCATTAGCGGAACCGTTTGCGATCTGCCA  
CAAGTGTGATAAGTTATCTACACTGGCGAGGGGATTGCTCTCTGTAATGTTGAGCTTCTA  
ATTGTCTCTACTTTGTGAGACTACTTTTGAATGCTTGACCTCAAATCAGGTAGGACTACC  
CGCTGAACTTAA

>ABC12-14

TTTCCGTAGGTGAACCTGCGGAAGGATCATTATTGAATTATGTTTCTAGATAGGTTGTAG  
CTGGCTCTTTTAGAGCATGTGCACGCCTGTTTGGACTTCATTTTCATCCACCTGTGCACC  
TATTGTAGTCTTTGGTTGGGTTAGGAGGAAGTGATCATTGTATCAGCATCTGCTGGGAGT



GAGGACTTGCATTGTGAAAGCTTTGCTGTCCTTGATGTGATCATGGAATCTTTTTCTCAC  
TAGAGTCTATGTCACCTATTATACTCTGTGCAATGTCATTGAATGTCTTTACATGGGCTT  
GTATGCCTATGAAAATTGTAATACAACCTTTCAGCAACGGATCTCTTGGCTCTCGCATCGA  
TGAAGAACGCAGCGAAATGCGATAAGTAATGTGAATTGCAGAATTCAGTGAATCATCGAA  
TCTTTGAACGCATCTTGCGCTCCTTGGTATTCCGAGGAGCATGCCTGTTTGAGTGTCAAT  
AAATTCTCAACTCTCTTATAC-TTTTTGTAAAAGAGAGCTTGGACTGTGGAGGCTTGCT  
GGCCACTTTTTGGGGTCAGCTCCTCTGAAATGCATTAGCGGAACCGTTTGCGATCTGCCA  
CAAGTGTGATAAGTTATCTACACTGGCGAGGGGATTGCTCTCTGTAATGTTTCAGCTTCTA  
ATTGTCTCTACTTTGTGAGACTACTTTTGAATGCTTGACCTCAAATCAGGTAGGACTACC  
CGCTGAACTTAA

>ABC12-16

TTTCCGTAGGTGAACCTGCGGAAGGATCATTATTGAATTATGTTTCTAGATAGGTTGTAG  
CTGGCTCTTTTAGAGCATGTGCACGCCTGTTTGGACTTCATTTTCATCCACCTGTGCACC  
TATTGTAGTCTTTGGTTGGGTTAGGAGGAAGTGATCATTGTATCAGCATCTGCTGGGAGT  
GAGGACTTGCATTGTGAAAGCTTTGCTGTCCTTGATGTGATCATGGAATCTTTTTCTCAC  
TAGAGTCTATGTCACCTATTATACTCTGTGCAATGTCATTGAATGTCTTTACATGGGCTT  
GTATGCCTATGAAAATTGTAATACAACCTTTCAGCAACGGATCTCTTGGCTCTCGCATCGA  
TGAAGAACGCAGCGAAATGCGATAAGTAATGTGAATTGCAGAATTCAGTGAATCATCGAA  
TCTTTGAACGCATCTTGCGCTCCTTGGTATTCCGAGGAGCATGCCTGTTTGAGTGTCAAT  
AAATTCTCAACTCTCTTATAC-TTTTTGTAAAAGAGAGCTTGGACTGTGGAGGCTTGCT  
GGCCACTTTTTGGGGTCAGCTCCTCTGAAATGCATTAGCGGAACCGTTTGCGATCTGCCA  
CAAGTGTGATAAGTTATCTACACTGGCGAGGGGATTGCTCTCTGTAATGTTTCAGCTTCTA  
ATTGTCTCTACTTTGTGAGACTACTTTTGAATGCTTGACCTCAAATCAGGTAGGACTACC  
CGCTGAACTTAA

>ABC12-21

TTTCCGTAGGTGAACCTGCGGAAGGATCATTATTGAATTATGTTTCTAGATAGGTTGTAG  
CTGGCTCTTTTAGAGCATGTGCACGCCTGTTTGGACTTCATTTTCATCCACCTGTGCACC  
TATTGTAGTCTTTGGTTGGGTTAGGAGGAAGTGATCATTGTATCAGCATCTGCTGGGAGT  
GAGGACTTGCATTGTGAAAGCTTTGCTGTCCTTGATGTGATCATGGAATCTTTTTCTCAC  
TAGAGTCTATGTCACCTATTATACTCTGTGCAATGTCATTGAATGTCTTTACATGGGCTT  
GTATGCCTATGAAAATTGTAATACAACCTTTCAGCAACGGATCTCTTGGCTCTCGCATCGA  
TGAAGAACGCAGCGAAATGCGATAAGTAATGTGAATTGCAGAATTCAGTGAATCATCGAA  
TCTTTGAACGCATCTTGCGCTCCTTGGTATTCCGAGGAGCATGCCTGTTTGAGTGTCAAT  
AAATTCTCAACTCTCTTATAC-TTTTTGTAAAAGAGAGCTTGGACTGTGGAGGCTTGCT  
GGCCACTTTTTGGGGTCAGCTCCTCTGAAATGCATTAGCGGAACCGTTTGCGATCTGCCA  
CAAGTGTGATAAGTTATCTACACTGGCGAGGGGATTGCTCTCTGTAATGTTTCAGCTTCTA  
ATTGTCTCTACTTTGTGAGACTACTTTTGAATGCTTGACCTCAAATCAGGTAGGACTACC  
CGCTGAACTTAA

>ABC12-23

TTTCCGTAGGTGAACCTGCGGAAGGATCATTATTGAATTATGTTTCTAGATAGGTTGTAG  
CTGGCTCTTTTAGAGCATGTGCACGCCTGTTTGGACTTCATTTTCATCCACCTGTGCACC  
TATTGTAGTCTTTGGTTGGGTTAGGAGGAAGTGATCATTGTATCAGCATCTGCTGGGAGT  
GAGGACTTGCATTGTGAAAGCTTTGCTGTCCTTGATGTGATCATGGAATCTTTTTCTCAC  
TAGAGTCTATGTCACCTATTATACTCTGTGCAATGTCATTGAATGTCTTTACATGGGCTT  
GTATGCCTATGAAAATTGTAATACAACCTTTCAGCAACGGATCTCTTGGCTCTCGCATCGA  
TGAAGAACGCAGCGAAATGCGATAAGTAATGTGAATTGCAGAATTCAGTGAATCATCGAA  
TCTTTGAACGCATCTTGCGCTCCTTGGTATTCCGAGGAGCATGCCTGTTTGAGTGTCAAT  
AAATTCTCAACTCTCTTATAC-TTTTTGTAAAAGAGAGCTTGGACTGTGGAGGCTTGCT  
GGCCACTTTTTGGGGTCAGCTCCTCTGAAATGCATTAGCGGAACCGTTTGCGATCTGCCA  
CAAGTGTGATAAGTTATCTACACTGGCGAGGGGATTGCTCTCTGTAATGTTTCAGCTTCTA



ATTGTCTCTACTTTGTGAGACTACTTTTGAATGCTTGACCTCAAATCAGGTAGGACTACC  
CGCTGAACTTAA

>ABC12-26

TTTCCGTAGGTGAACCTGCGGAAGGATCATTATTGAATTATGTTTCTAGATAGGTTGTAG  
CTGGCTCTTTTAGAGCATGTGCACGCCTGTTTGGACTTCATTTTCATCCACCTGTGCACC  
TATTGTAGTCTTTGGTTGGGTTAGGAGGAAGTGATCATTGTATCAGCATCTGCTGGGAGT  
GAGGACTTGCATTGTGAAAGCTTTGCTGTCCTTGATGTGATCATGGAATCTTTTTCTCAC  
TAGAGTCTATGTCACTCATTATACTCTGTGCAATGTCATTGAATGTCTTTACATGGGCTT  
GTATGCCTATGAAAATTGTAATAACAACCTTTCAGCAACGGATCTCTTGGCTCTCGCATCGA  
TGAAGAACGCAGCGAAATGCGATAAGTAATGTGAATTGCAGAATTCAGTGAATCATCGAA  
TCTTTGAACGCATCTTGCCTCCTTGGTATTCCGAGGAGCATGCCTGTTTGAGTGTCAAT  
AAATTCTCAACTCTCTTATAC-TTTTTGTAAAAGAGAGCTTGGACTGTGGAGGCTTGCT  
GGCCACTTTTTGGGGTCAGCTCCTCTGAAATGCATTAGCGGAACCGTTTGCGATCTGCCA  
CAAGTGTGATAAGTTATCTACACTGGCGAGGGGATTGCTCTCTGTAATGTTTCAGCTTCTA  
ATTGTCTCTACTTTGTGAGACTACTTTTGAATGCTTGACCTCAAATCAGGTAGGACTACC  
CGCTGAACTTAA

>ABC12-30

TTTCCGTAGGTGAACCTGCGGAAGGATCATTATTGAATTATGTTTCTAGATAGGTTGTAG  
CTGGCTCTTTTAGAGCATGTGCACGCCTGTTTGGACTTCATTTTCATCCACCTGTGCACC  
TATTGTAGTCTTTGGTTGGGTTAGGAGGAAGTGATCATTGTATCAGCATCTGCTGGGAGT  
GAGGACTTGCATTGTGAAAGCTTTGCTGTCCTTGATGTGATCATGGAATCTTTTTCTCAC  
TAGAGTCTATGTCACTCATTATACTCTGTGCAATGTCATTGAATGTCTTTACATGGGCTT  
GTATGCCTATGAAAATTGTAATAACAACCTTTCAGCAACGGATCTCTTGGCTCTCGCATCGA  
TGAAGAACGCAGCGAAATGCGATAAGTAATGTGAATTGCAGAATTCAGTGAATCATCGAA  
TCTTTGAACGCATCTTGCCTCCTTGGTATTCCGAGGAGCATGCCTGTTTGAGTGTCAAT  
AAATTCTCAACTCTCTTATAC-TTTTTGTAAAAGAGAGCTTGGACTGTGGAGGCTTGCT  
GGCCACTTTTTGGGGTCAGCTCCTCTGAAATGCATTAGCGGAACCGTTTGCGATCTGCCA  
CAAGTGTGATAAGTTATCTACACTGGCGAGGGGATTGCTCTCTGTAATGTTTCAGCTTCTA  
ATTGTCTCTACTTTGTGAGACTACTTTTGAATGCTTGACCTCAAATCAGGTAGGACTACC  
CGCTGAACTTAA

>ABC12-41

TTTCCGTAGGTGAACCTGCGGAAGGATCATTATTGAATTATGTTTCTAGATAGGTTGTAG  
CTGGCTCTTTTAGAGCATGTGCACGCCTGTTTGGACTTCATTTTCATCCACCTGTGCACC  
TATTGTAGTCTTTGGTTGGGTTAGGAGGAAGTGATCATTGTATCAGCATCTGCTGGGAGT  
GAGGACTTGCATTGTGAAAGCTTTGCTGTCCTTGATGTGATCATGGAATCTTTTTCTCAC  
TAGAGTCTATGTCACTCATTATACTCTGTGCAATGTCATTGAATGTCTTTACATGGGCTT  
GTATGCCTATGAAAATTGTAATAACAACCTTTCAGCAACGGATCTCTTGGCTCTCGCATCGA  
TGAAGAACGCAGCGAAATGCGATAAGTAATGTGAATTGCAGAATTCAGTGAATCATCGAA  
TCTTTGAACGCATCTTGCCTCCTTGGTATTCCGAGGAGCATGCCTGTTTGAGTGTCAAT  
AAATTCTCAACTCTCTTATAC-TTTTTGTAAAAGAGAGCTTGGACTGTGGAGGCTTGCT  
GGCCACTTTTTGGGGTCAGCTCCTCTGAAATGCATTAGCGGAACCGTTTGCGATCTGCCA  
CAAGTGTGATAAGTTATCTACACTGGCGAGGGGATTGCTCTCTGTAATGTTTCAGCTTCTA  
ATTGTCTCTACTTTGTGAGACTACTTTTGAATGCTTGACCTCAAATCAGGTAGGACTACC  
CGCTGAACTTAA

>ABC12-44

TTTCCGTAGGTGAACCTGCGGAAGGATCATTATTGAATTATGTTTCTAGATAGGTTGTAG  
CTGGCTCTTTTAGAGCATGTGCACGCCTGTTTGGACTTCATTTTCATCCACCTGTGCACC  
TATTGTAGTCTTTGGTTGGGTTAGGAGGAAGTGATCATTGTATCAGCATCTGCTGGGAGT  
GAGGACTTGCATTGTGAAAGCTTTGCTGTCCTTGATGTGATCATGGAATCTTTTTCTCAC  
TAGAGTCTATGTCACTCATTATACTCTGTGCAATGTCATTGAATGTCTTTACATGGGCTT



GTATGCCTATGAAAATTGTAATACAACCTTTTCAGCAACGGATCTCTTGGCTCTCGCATCGA  
TGAAGAACGCAGCGAAATGCGATAAGTAATGTGAATTGCAGAATTCAGTGAATCATCGAA  
TCTTTGAACGCATCTTGCCTCCTTGGTATTCCGAGGAGCATGCCTGTTTGAGTGTCAAT  
AAATTCTCAACTCTCTTATAC-TTTTTTGAAAAGAGAGCTTGGACTGTGGAGGCTTGCT  
GGCCACTTTTTGGGGTCAGCTCCTCTGAAATGCATTAGCGGAACCGTTTGCGATCTGCCA  
CAAGTGTGATAAGTTATCTACACTGGCGAGGGGATTGCTCTCTGTAATGTTTCAGCTTCTA  
ATTGTCTCTACTTTGTGAGACTACTTTTGAATGCTTGACCTCAAATCAGGTAGGACTACC  
CGCTGAACTTAA

>ABC12-46

TTTCCGTAGGTGAACCTGCGGAAGGATCATTATTGAATTATGTTTCTAGATAGGTTGTAG  
CTGGCTCTTTTAGAGCATGTGCACGCCTGTTTGGACTTCATTTTCATCCACCTGTGCACC  
TATTGTAGTCTTTGGTTGGGTTAGGAGGAAGTGATCATTGTATCAGCATCTGCTGGGAGT  
GAGGACTTGCATTGTGAAAGCTTTGCTGTCCTTGATGTGATCATGGAATCTTTTTCTCAC  
TAGAGTCTATGTCACCTCATTATACTCTGTCTGAATGTCATTGAATGTCTTTACATGGGCTT  
GTATGCCTATGAAAATTGTAATACAACCTTTTCAGCAACGGATCTCTTGGCTCTCGCATCGA  
TGAAGAACGCAGCGAAATGCGATAAGTAATGTGAATTGCAGAATTCAGTGAATCATCGAA  
TCTTTGAACGCATCTTGCCTCCTTGGTATTCCGAGGAGCATGCCTGTTTGAGTGTCAAT  
AAATTCTCAACTCTCTTATAC-TTTTTTGAAAAGAGAGCTTGGACTGTGGAGGCTTGCT  
GGCCACTTTTTGGGGTCAGCTCCTCTGAAATGCATTAGCGGAACCGTTTGCGATCTGCCA  
CAAGTGTGATAAGTTATCTACACTGGCGAGGGGATTGCTCTCTGTAATGTTTCAGCTTCTA  
ATTGTCTCTACTTTGTGAGACTACTTTTGAATGCTTGACCTCAAATCAGGTAGGACTACC  
CGCTGAACTTAA

>ABC11-16

TTTCCGTAGGTGAACCTGCGGAAGGATCATTATTGAATTATGTTTCTAGATAGGTTGTAG  
CTGGCTCTTTTAGAGCATGTGCACGCCTGTTTGGACTTCATTTTCATCCACCTGTGCACC  
TATTGTAGTCTTTGGTTGGGTTAGGAGGAAGTGATCATTGTATCAGCATCTGCTGGGAGT  
GAGGACTTGCATTGTGAAAGCTTTGCTGTCCTTGATGTGATCATGGAATCTTTTTCTCAC  
TAGAGTCTATGTCACCTCATTATACTCTGTCTGAATGTCATTGAATGTCTTTACATGGGCTT  
GTATGCCTATGAAAATTGTAATACAACCTTTTCAGCAACGGATCTCTTGGCTCTCGCATCGA  
TGAAGAACGCAGCGAAATGCGATAAGTAATGTGAATTGCAGAATTCAGTGAATCATCGAA  
TCTTTGAACGCATCTTGCCTCCTTGGTATTCCGAGGAGCATGCCTGTTTGAGTGTCAAT  
AAATTCTCAACTCTCTTATAC-TTTTTTGAAAAGAGAGCTTGGACTGTGGAGGCTTGCT  
GGCCACTTTTTGGGGTCAGCTCCTCTGAAATGCATTAGCGGAACCGTTTGCGATCTGCCA  
CAAGTGTGATAAGTTATCTACACTGGCGAGGGGATTGCTCTCTGTAATGTTTCAGCTTCTA  
ATTGTCTCTACTTTGTGAGACTACTTTTGAATGCTTGACCTCAAATCAGGTAGGACTACC  
CGCTGAACTTAA

>ABC5-38

TTTCCGTAGGTGAACCTGCGGAAGGATCATTATTGAATTATGTTTCTAGATAGGTTGTAG  
CTGGCTCTTTTAGAGCATGTGCACGCCTGTTTGGACTTCATTTTCATCCACCTGTGCACC  
TATTGTAGTCTTTGGTTGGGTTAGGAGGAAGTGATCATTGTATCAGCATCTGCTGGGAGT  
GAGGACTTGCATTGTGAAAGCTTTGCTGTCCTTGATGTGATCATGGAATCTTTTTCTCAC  
TAGAGTCTATGTCACCTCATTATACTCTGTCTGAATGTCATTGAATGTCTTTACATGGGCTT  
GTATGCCTATGAAAATTGTAATACAACCTTTTCAGCAACGGATCTCTTGGCTCTCGCATCGA  
TGAAGAACGCAGCGAAATGCGATAAGTAATGTGAATTGCAGAATTCAGTGAATCATCGAA  
TCTTTGAACGCATCTTGCCTCCTTGGTATTCCGAGGAGCATGCCTGTTTGAGTGTCAAT  
AAATTCTCAACTCTCTTATAC-TTTTTTGAAAAGAGAGCTTGGACTGTGGAGGCTTGCT  
GGCCACTTTTTGGGGTCAGCTCCTCTGAAATGCATTAGCGGAACCGTTTGCGATCTGCCA  
CAAGTGTGATAAGTTATCTACACTGGCGAGGGGATTGCTCTCTGTAATGTTTCAGCTTCTA  
ATTGTCTCTACTTTGTGAGACTACTTTTGAATGCTTGACCTCAAATCAGGTAGGACTACC  
CGCTGAACTTAA



>ABC2-28

TTTCCGTAGGTGAACCTGCGGAAGGATCATTATTGAATTATGTTTCTAGATAGGTTGTAG  
CTGGCTCTTTTAGAGCATGTGCACGCCTGTTTGGACTTCATTTTCATCCACCTGTGCACC  
TATTGTAGTCTTTGGTTGGGTTAGGAGGAAGTGATCATTGTATCAGCATCTGCTGGGAGT  
GAGGACTTGCATTGTGAAAGCTTTGCTGTCCTTGATGTGATCATGGAATCTTTTTCTCAC  
TAGAGTCTATGTCACCTCATTATACTCTGTGCGAATGTCATTGAATGTCTTTACATGGGCTT  
GTATGCCTATGAAAATTGTAATACAACCTTTCAGCAACGGATCTCTTGGCTCTCGCATCGA  
TGAAGGACGCAGCGAAATGCGATAAGTAATGTGAATTGCAGAATTCAGTGAATCATCGAA  
TCTTTGAACGCATCTTGCGCTCCTTGGTATTCCGAGGAGCATGCCTGTTTGAGTGTCAAT  
AAATTCTCAACTCTCTTATAC-TTTTTGTAAAAGAGAGCTTGGACTGTGGAGGCTTGCT  
GGCCACTTTTTGGGGTCAGCTCCTCTGAAATGCATTAGCGGAACCGTTTGCGATCTGCCA  
CAAGTGTGATAAGTTATCTACACTGGCGAGGGGATTGCTCTCTGTAATGTTTCAGCTTCTA  
ATTGTCTCTACTTTGTGAGACTACTTTTGAATGCTTGACCTCAAATCAGGTAGGACTACC  
CGCTGAACTTAA

>ABC7-36

TTTCCGTAGGTGAACCTGCGGAAGGATCATTATTGAATTATGTTTCTAGATAGGTTGTAG  
CTGGCTCTTTTAGAGCATGTGCACGCCTGTTTGGACTTCATTTTCATCCACCTGTGCACC  
TATTGTAGTCTTTGGTTGGGTTAGGAGGAAGTGATCATTGTATCAGCATCTGCTGGGAGT  
GAGGACTTGCATTGTGAAAGCTTTGCTGTCCTTGATGTGATCATGGAATCTTTTTCTCAC  
TAGAGTCTATGTCACCTCATTATACTCTGTGCGAATGTCATTGAATGTCTTTACATGGGCTT  
GTATGCCTATGAAAATTGTAATACAACCTTTCAGCAACGGATCTCTTGGCTCTCGCATCGA  
TGAAGGACGCAGCGAAATGCGATAAGTAATGTGAATTGCAGAATTCAGTGAATCATCGAA  
TCTTTGAACGCATCTTGCGCTCCTTGGTATTCCGAGGAGCATGCCTGTTTGAGTGTCAAT  
AAATTCTCAACTCTCTTATAC-TTTTTGTAAAAGAGAGCTTGGACTGTGGAGGCTTGCT  
GGCCACTTTTTGGGGTCAGCTCCTCTGAAATGCATTAGCGGAACCGTTTGCGATCTGCCA  
CAAGTGTGATAAGTTATCTACACTGGCGAGGGGATTGCTCTCTGTAATGTTTCAGCTTCTA  
ATTGTCTCTACTTTGTGAGACTACTTTTGAATGCTTGACCTCAAATCAGGTAGGACTACC  
CGCTGAACTTAA

>ABC1-7

TTTCCGTAGGTGAACCTGCGGAAGGATCATTATTGAATTATGTTTCTAGATAGGTTGTAG  
CTGGCTCTTTTAGAGCATGTGCACGCCTGTTTGGACTTCATTTTCATCCACCTGTGCACC  
TATTGTAGTCTTTGGTTGGGTTAGGAGGAAGTGATCATTGTATCAGCATCTGCTGGGAGT  
GAGGACTTGCATTGTGAAAGCTTTGCTGTCCTTGATGTGATCATGGAATCTTTTTCTCAC  
TAGAGTCTATGTCACCTCATTATACTCTGTGCGAATGTCATTGAATGTCTTTACATGGGCTT  
GTATGCCTATGAAAATTGTAATACAACCTTTCAGCAACGGATCTCTTGGCTCTCGCATCGA  
TGAAGGACGCAGCGAAATGCGATAAGTAATGTGAATTGCAGAATTCAGTGAATCATCGAA  
TCTTTGAACGCATCTTGCGCTCCTTGGTATTCCGAGGAGCATGCCTGTTTGAGTGTCAAT  
AAATTCTCAACTCTCTTATAC-TTTTTGTAAAAGAGAGCTTGGACTGTGGAGGCTTGCT  
GGCCACTTTTTGGGGTCAGCTCCTCTGAAATGCATTAGCGGAACCGTTTGCAATCTGCCA  
CAAGTGTGATAAGTTATCTACACTGGCGAGGGGATTGCTCTCTGTAATGTTTCAGCTTCTA  
ATTGTCTCTACTTTGTGAGACTACTTTTGAATGCTTGACCTCAAATCAGGTAGGACTACC  
CGCTGAACTTAA

>ABC4-77

TTTCCGTAGGTGAACCTGCGGAAGGATCATTATTGAATTATGTTTCTAGATAGGTTGTAG  
CTGGCTCTTTTAGAGCATGTGCACGCCTGTTTGGACTTCATTTTCATCCACCTGTGCACC  
TATTGTAGTCTTTGGTTGGGTTAGGAGGAAGTGATCATTGTATCAGCATCTGCTGGGAGT  
GAGGACTTGCATTGTGAAAGCTTTGCTGTCCTTGATGTGATCATGGAATCTTTTTCTCAC  
TAGAGTCTATGTCACCTCATTATACTCTGTGCGAATGTCATTGAATGTCTTTACATGGGCTT  
GTATGCCTATGAAAATTGTAATACAACCTTTCAGCAACGGATCTCTTGGCTCTCGCATCGA  
TGAAGAACGCAGCGAAATGCGATAAGTAATGTGAATTGCAGAATTCAGTGAATCATCGAA



TCTTTGAACGCATCTTGCGCTCCTTGGTATTCCGAGGAGCATGCCTGTTTGAGTGTCAATT  
AAATTCTCAACTCTCTTATAC-TTTTTGTAAAAGAGAGCTTGGACTGTGGAGGCTTGCT  
GGCCACTTTTTGGGGTCAGCTCCTCTGAAATGCATTAGCGGAACCGTTTGCAATCTGCCA  
CAAGTGTGATAAGTTATCTACACTGGCGAGGGGATTGCTCTCTGTAATGTTGAGCTTCTA  
ATTGTCTCTACTTTGTGAGACTACTTTTGAATGCTTGACCTCAAATCAGGTAGGACTACC  
CGCTGAACTTAA

>ABC10-22

TTTCCGTAGGTGAACCTGCGGAAGGATCATTATTGAATTATGTTTCTAGATAGGTTGTAG  
CTGGCTCTTTTAGAGCATGTGCACGCCTGTTTGGACTTCATTTTCATCCACCTGTGCACC  
TATTGTAGTCTTTGGTTGGGTTAGGAGGAAGTGATCATTGTATCAGCATCTGCTGGGAGT  
GAGGACTTGCAATTGTGAAAGCTTTGCTGTCTTGATGTGATCATGGAATCTTTTCTCAC  
TAGAGTCTATGTCACTCATTATACTCTGTGCAATGTCATTGAATGTCTTTACATGGGCTT  
GTATGCCTATGAAAATTGTAATACAACCTTTCAGCAACGGATCTCTTGGCTCTCGCATCGA  
TGAAGAACGCAGCGAAATGCGATAAGTAATGTGAATTGCAGAATTCAGTGAATCATCGAA  
TCTTTGAACGCATCTTGCGCTCCTTGGTATTCCGAGGAGCATGCCTGTTTGAGTGTCAATT  
AAATTCTCAACTCTCTTATAC-TTTTTGTAAAAGAGAGCTTGGACTGTGGAGGCTTGCT  
GGCCACTTTTTGGGGTCAGCTCCTCTGAAATGCATTAGCGGAACCGTTTGCAATCTGCCA  
CAAGTGTGATAAGTTATCTACACTGGCGAGGGGATTGCTCTCTGTAATGTTGAGCTTCTA  
ATTGTCTCTACTTTGTGAGACTACTTTTGAATGCTTGACCTCAAATCAGGTAGGACTACC  
CGCTGAACTTAA

>ABC3-45

TTTCCGTAGGTGAACCTGCGGAAGGATCATTATTGAATTATGTTTCTAGATAGGTTGTAG  
CTGGCTCTTTTAGAGCATGTGCACGCCTGTTTGGACTTCATTTTCATCCACCTGTGCACC  
TATTGTAGTCTTTGGTTGGGTTAGGAGGAAGTGATCATTGTATCAGCATCTGCTGGGAGT  
GAGGACTTGCAATTGTGAAAGCTTTGCTGTCTTGATGTGATCATGGAATCTTTTCTCAC  
TAGAGTCTATGTCACTCATTATACTCTGTGCAATGTCATTGAATGTCTTTACATGGGCTT  
ATATGCCTATGAAAATTGTAATACAACCTTTCAGCAACGGATCTCTTGGCTCTCGCATCGA  
TGAAGAACGCAGCGAAATGCGATAAGTAATGTGAATTGCAGAATTCAGTGAATCATCGAA  
TCTTTGAACGCATCTTGCGCTCCTTGGTATTCCGAGGAGCATGCCTGTTTGAGTGTCAATT  
AAATTCTCAACTCTCTTATAC-TTTTTGTAAAAGAGAGCTTGGACTGTGGAGGCTTGCT  
GGCCACTTTTTGGGGTCAGCTCCTCTGAAATGCATTAGCGGAACCGTTTGCGATCTGCCA  
CAAGTGTGATAAGTTATCTACACTGGCGAGGGGATTGCTCTCTGTAATGTTGAGCTTCTA  
ATTGTCTCTACTTTGTGAGACTACTTTTGAATGCTTGACCTCAAATCAGGTAGGACTACC  
CGCTGAACTTAA

>ABC12-32

TTTCCGTAGGTGAACCTGCGGAAGGATCATTATTGAATTATGTTTCTAGATAGGTTGTAG  
CTGGCTCTTTTAGAGCATGTGCACGCCTGTTTGGACTTCATTTTCATCCACCTGTGCACC  
TATTGTAGTCTTTGGTTGGGTTAGGAGGAAGTGATCATTGTATCAGCATCTGCTGGGAGT  
GAGGACTTGCAATTGTGAAAGCTTTGCTGTCTTGATGTGATCATGGAATCTTTTCTCAC  
TAGAGTCTATGTCACTCATTATACTCTGTGCAATGTCATTGAATGTCTTTACATGGGCTT  
ATATGCCTATGAAAATTGTAATACAACCTTTCAGCAACGGATCTCTTGGCTCTCGCATCGA  
TGAAGAACGCAGCGAAATGCGATAAGTAATGTGAATTGCAGAATTCAGTGAATCATCGAA  
TCTTTGAACGCATCTTGCGCTCCTTGGTATTCCGAGGAGCATGCCTGTTTGAGTGTCAATT  
AAATTCTCAACTCTCTTATAC-TTTTTGTAAAAGAGAGCTTGGACTGTGGAGGCTTGCT  
GGCCACTTTTTGGGGTCAGCTCCTCTGAAATGCATTAGCGGAACCGTTTGCGATCTGCCA  
CAAGTGTGATAAGTTATCTACACTGGCGAGGGGATTGCTCTCTGTAATGTTGAGCTTCTA  
ATTGTCTCTACTTTGTGAGACTACTTTTGAATGCTTGACCTCAAATCAGGTAGGACTACC  
CGCTGAACTTAA

>ABC3-35

TTTCCGTAGGTGAACCTGCGGAAGGATCATTATTGAATTATGTTTCTAGATAGGTTGTAG



CTGGCTCTTTTAGAGCATGTGCACGCCTGTTTGGACTTCATTTTCATCCACCTGTGCACC  
TATTGTAGTCTTTGGTTGGGTTAGGAGGAAGTGATCATTGTATCAGCATCTGCTGGGAGT  
GAGGACTTGCATTGTGAAAGCTTTGCTGTCCTTGATGTGATCATGGAATCTTTTCTCAC  
TAGAGTCTATGTCACCTATTATACTCTGTGCAATGTCATTGAATGTCTTTACATGGGCTT  
ATATGCCTATGAAAATTGTAATACAACCTTTCAGCAACGGATCTCTTGGCTCTCGCATCGA  
TGAAGAACGCAGCGAAATGCGATAAGTAATGTGAATTGCAGAATTCAGTGAATCATCGAA  
TCTTTGAACGCATCTTGCCTCCTTGGTATTCCGAGGAGCATGCCTGTTTGAGTGTCAAT  
AAATTCTCAACTCTCTTATAC-TTTTTTGTAAGAGAGCTTGGACTGTGGAGGCTTGCT  
GGCCACTTTTTGGGGTCAGCTCCTCTGAAATGCATTAGCGGAACCGTTTGCAATCTGCCA  
CAAGTGTGATAAGTTATCTACACTGGCGAGGGGATTGCTCTCTGTAATGTTTCAGCTTCTA  
ATTGTCTCTACTTTGTGAGACTACTTTTGAATGCTTGACCTCAAATCAGGTAGGACTACC  
CGCTGAACTTAA

>ABC3-25

TTTCCGTAGGTGAACCTGCGGAAGGATCATTATTGAATTATGTTTCTAGATAGGTTGTAG  
CTGGCTCTTTTAGAGCATGTGCACGCCTGTTTGGACTTCATTTTCATCCACCTGTGCACC  
TATTGTAGTCTTTGGTTGGGTTAGGAGGAAGTGATCATTGTATCAGCATCTGCTGGGAGT  
GAGGACTTGCATTGTGAAAGCTTTGCTGTCCTTGATGTGATCATGGAATCTCTTTCTCAC  
TAGAGTCTATGTCACCTATTATACTCTGTGCAATGTCATTGAATGTCTTTACATGGGCTT  
ATATGCCTATGAAAATTGTAATACAACCTTTCAGCAACGGATCTCTTGGCTCTCGCATCGA  
TGAAGAACGCAGCGAAATGCGATAAGTAATGTGAATTGCAGAATTCAGTGAATCATCGAA  
TCTTTGAACGCATCTTGCCTCCTTGGTATTCCGAGGAGCATGCCTGTTTGAGTGTCAAT  
AAATTCTCAACTCTCTTATAC-TTTTTTGTAAGAGAGCTTGGACTGTGGAGGCTTGCT  
GGCCACTTTTTGGGGTCAGCTCCTCTGAAATGCATTAGCGGAACCGTTTGCAATCTGCCA  
CAAGTGTGATAAGTTATCTACACTGGCGAGGGGATTGCTCTCTGTAATGTTTCAGCTTCTA  
ATTGTCTCTACTTTGTGAGACTACTTTTGAATGCTTGACCTCAAATCAGGTAGGACTACC  
CGCTGAACTTAA

>ABC12-43

TTTCCGTAGGTGAACCTGCGGAAGGATCATTATTGAATTATGTTTCTAGATAGGTTGTAG  
CTGGCTCTTTTAGAGCATGTGCACGCCTGTTTGGACTTCATTTTCATCCACCTGTGCACC  
TATTGTAGTCTTTGGTTGGGTTAGGAGGAAGTGATCATTGTATCAGCATCTGCTGGGAGT  
GAGGACTTGCATTGTGAAAGCTTTGCTGTCCTTGATGTGATCATGGAATCTCTTTCTCAC  
TAGAGTCTATGTCACCTATTATACTCTGTGCAATGTCATTGAATGTCTTTACATGGGCTT  
ATATGCCTATGAAAATTGTAATACAACCTTTCAGCAACGGATCTCTTGGCTCTCGCATCGA  
TGAAGAACGCAGCGAAATGCGATAAGTAATGTGAATTGCAGAATTCAGTGAATCATCGAA  
TCTTTGAACGCATCTTGCCTCCTTGGTATTCCGAGGAGCATGCCTGTTTGAGTGTCAAT  
AAATTCTCAACTCTCTTATAC-TTTTTTGTAAGAGAGCTTGGACTGTGGAGGCTTGCT  
GGCCACTTTTTGGGGTCAGCTCCTCTGAAATGCATTAGCGGAACCGTTTGCAATCTGCCA  
CAAGTGTGATAAGTTATCTACACTGGCGAGGGGATTGCTCTCTGTAATGTTTCAGCTTCTA  
ATTGTCTCTACTTTGTGAGACTACTTTTGAATGCTTGACCTCAAATCAGGTAGGACTACC  
CGCTGAACTTAA

>ABC11-5

TTTCCGTAGGTGAACCTGCGGAAGGATCATTATTGAATTATGTTTCTAGATAGGTTGTAG  
CTGGCTCTTTTAGAGCATGTGCACGCCTGTTTGGACTTCATTTTCATCCACCTGTGCACC  
TATTGTAGTCTTTGGTTGGGTTAGGAGGAAGTGATCATTGTATCAGCATCTGCTGGGAGT  
GAGGACTTGCATTGTGAAAGCTTTGCTGTCCTTGATGTGATCATGGAATCTCTTTCTCAC  
TAGAGTCTATGTCACCTATTATACTCTGTGCAATGTCATTGAATGTCTTTACATGGGCTT  
GTATGCCTATGAAAATTGTAATACAACCTTTCAGCAACGGATCTCTTGGCTCTCGCATCGA  
TGAAGGACGCAGCGAAATGCGATAAGTAATGTGAATTGCAGAATTCAGTGAATCATCGAA  
TCTTTGAACGCATCTTGCCTCCTTGGTATTCCGAGGAGCATGCCTGTTTGAGTGTCAAT  
AAATTCTCAACTCTCTTATAC-TTTTTTGTAAGAGAGCTTGGACTGTGGAGGCTTGCT



GGCCACTTTTTGGGGTCAGCTCCTCTGAAATGCATTAGCGGAACCGTTTGCGATCTGCCA  
CAAGTGTGATAAGTTATCTACACTGGCGAGGGGATTGCTCTCTGTAATGTTGAGCTTCTA  
ATTGTCTCTACTTTGTGAGACTACTTTTGAATGCTTGACCTCAAATCAGGTAGGACTACC  
CGCTGAACTTAA

>ABC9-26

TTTCCGTAGGTGAACCTGCGGAAGGATCATTATTGAATTATGTTTCTAGATAGGTTGTAG  
CTGGCTCTTTTAGAGCATGTGCACGCCTGTTTGGACTTCATTTTCATCCACCTGTGCACC  
TATTGTAGTCTTTGGTTGGGTTAGGAGGAAGTGATCATTGTATCAGCATCTGCTGGGAGT  
GAGGACTTGCATTGTGAAAGCTTTGCTGTCCTTGATGTGATCATGGAATCTCTTTCTCAC  
TAGAGTCTATGTCACTCATTATACTCTGTGCAATGTCATTGAATGTCTTTACATGGGCTT  
GTATGCCTATGAAAATTGTAATACTTTTTCAGCAACGGATCTCTTGGCTCTCGCATCGA  
TGAAGAACGCAGCGAAATGCGATAAGTAATGTGAATTGCAGAATTCAGTGAATCATCGAA  
TCTTTGAACGCATCTTGCGCTCCTTGGTATTCCGAGGAGCATGCCTGTTTGAGTGTGATT  
AAATTCTCAACTCTCTTATAC-TTTTTGTAAAAGAGAGCTTGGACTGTGGAGGCTTGCT  
GGCCACTTTTTGGGGTCAGCTCCTCTGAAATGCATTAGCGGAACCGTTTGCGATCTGCCA  
CAAGTGTGATAAGTTATCTACACTGGCGAGGGGATTGCTCTCTGTAATGTTGAGCTTCTA  
ATTGTCTCTACTTTGTGAGACTACTTTTGAATGCTTGACCTCAAATCAGGTAGGACTACC  
CGCTGAACTTAA

>ABC10-51

TTTCCGTAGGTGAACCTGCGGAAGGATCATTATTGAATTATGTTTCTAGATAGGTTGTAG  
CTGGCTCTTTTAGAGCATGTGCACGCCTGTTTGGACTTCATTTTCATCCACCTGTGCACC  
TATTGTAGTCTTTGGTTGGGTTAGGAGGAAGTGATCATTGTATCAGCATCTGCTGGGAGT  
GAGGACTTGCATTGTGAAAGCTTTGCTGTCCTTGATGTGATCATGGAATCTCTTTCTCAC  
TAGAGTCTATGTCACTCATTATACTCTGTGCAATGTCATTGAATGTCTTTACATGGGCTT  
GTATGCCTATGAAAATTGTAATACTTTTTCAGCAACGGATCTCTTGGCTCTCGCATCGA  
TGAAGAACGCAGCGAAATGCGATAAGTAATGTGAATTGCAGAATTCAGTGAATCATCGAA  
TCTTTGAACGCATCTTGCGCTCCTTGGTATTCCGAGGAGCATGCCTGTTTGAGTGTGATT  
AAATTCTCAACTCTCTTATAC-TTTTTGTAAAAGAGAGCTTGGACTGTGGAGGCTTGCT  
GGCCACTTTTTGGGGTCAGCTCCTCTGAAATGCATTAGCGGAACCGTTTGCGATCTGCCA  
CAAGTGTGATAAGTTATCTACACTGGCGAGGGGATTGCTCTCTGTAATGTTGAGCTTCTA  
ATTGTCTCTACTTTGTGAGACTACTTTTGAATGCTTGACCTCAAATCAGGTAGGACTACC  
CGCTGAACTTAA

>ABC5-17

TTTCCGTAGGTGAACCTGCGGAAGGATCATTATTGAATTATGTTTCTAGATAGGTTGTAG  
CTGGCTCTTTTAGAGCATGTGCACGCCTGTTTGGACTTCATTTTCATCCACCTGTGCACC  
TATTGTAGTCTTTGGTTGGGTTAGGAGGAAGTGATCATTGTATCAGCATCTGCTGGGAGT  
GAGGACTTGCATTGTGAAAGCTTTGCTGTCCTTGATGTGATCATGGAATCTCTTTCTCAC  
TAGAGTCTATGTCACTCATTATACTCTGTGCAATGTCATTGAATGTCTTTACATGGGCTT  
GTATGCCTATGAAAATTGTAATACTTTTTCAGCAACGGATCTCTTGGCTCTCGCATCGA  
TGAAGGACGCAGCGAAATGCGATAAGTAATGTGAATTGCAGAATTCAGTGAATCATCGAA  
TCTTTGAACGCATCTTGCGCTCCTTGGTATTCCGAGGAGCATGCCTGTTTGAGTGTGATT  
AAATTCTCAACTCTCTTATAC-TTTTTGTAAAAGAGAGCTTGGACTGTGGAGGCTTGCT  
GGCCACTTTTTGGGGTCAGCTCCTCTGAAATGCATTAGCGGAACCGTTTGTGATCTGCCA  
CAAGTGTGATAAGTTATCTACACTGGCGAGGGGATTGCTCTCTGTAATGTTGAGCTTCTA  
ATTGTCTCTACTTTGTGAGACTACTTTTGAATGCTTGACCTCAAATCAGGTAGGACTACC  
CGCTGAACTTAA

>ABC5-41

TTTCCGTAGGTGAACCTGCGGAAGGATCATTATTGAATTATGTTTCTAGATAGGTTGTAG  
CTGGCTCTTTTAGAGCATGTGCACGCCTGTTTGGACTTCATTTTCATCCACCTGTGCACC  
TATTGTAGTCTTTGGTTGGGTTAGGAGGAAGTGATCATTGTATCAGCATCTGCTGGGAGT



GAGGACTTGCATTGTGAAAGCTTTGCTGTCCTTGATGTGATCATGGAATCTTTTTCTCAC  
TAGAGTCTATGTCACCTATTATACTCTGTGCAATGTCATTGAATGTCTTTACATGGGCTT  
GTATGCCTATGAAAATTGTAATACAACCTTTCAGCAACGGATCTCTTGGCTCTCGCATCGA  
TGAAGAACGCAGCGAAATGCGATAAGTAATGTGAATTGCAGAATTCAGTGAATCATCGAA  
TCTTTGAACGCATCTTGCGCTCCTTGGTATTCCGAGGTGCATGCCTGTTTGAGTGTCAAT  
AAATTCTCAACTCTCTTATAC-TTTTTTGTAAGAGAGCTTGGACTGTGGAGGCTTGCT  
GGCCACTTTTTGGGGTCAGCTCCTCTGAAATGCATTAGCGGAACCGTTTGCGATCTGCCA  
CAAGTGTGATAAGTTATCTACACTGGCGAGGGGATTGCTCTCTGTAATGTTTCAGCTTCTA  
ATTGTCTCTACTTTGTGAGACTACTTTTGAATGCTTGACCTCAAATCAGGTAGGACTACC  
CGCTGAACTTAA

>ABC1-23

TTTCCGTAGGTGAACCTGCGGAAGGATCATTATTGAATTATGTTTCTAGATAGGTTGTAG  
CTGGCTCTTTTAGAGCATGTGCACGCCTGTTTGGACTTCATTTTCATCCACCTGTGCACC  
TATTGTAGTCTTTGGTTGGGTTAGGAGGAAGTGATCATTGTATCAGCATCTGCTGGGAGT  
GAGGACTTGCATTGTGAAAGCTTTGCTGTCCTTGATGTGATCATGGAATCTTTTTCTCAC  
TAGAGTCTATGTCACCTATTATACTCTGTGCAATGTCATTGAATGTCTTTACATGGGCTT  
GTATGCCTATGAAAATTGTAATACAACCTTTCAGCAACGGATCTCTTGGCTCTCGCATCGA  
TGAAGAACGCAGCGAAATGCGATAAGTAATGTGAATTGCAGAATTCAGTGAATCATCGAA  
TCTTTGAACGCATCTTGCGCTCCTTGGTATTCCGAGGAGCATGCCTGTTTGAGTGTCAAT  
AAATTCTCAACTCTCTTATAC-TTTTTTGTAAGAGAGCTTGGACTGTGGAGGCTTGCT  
GGCCACTTTTTGGGGTCAGCTCCTCTGAAATGCATTAGCGGAACCGTTTGCGATCTGCCA  
CAAGTGTGATAAGTTATCTACACTGGCGAGGGGATTGCTCTCTGTAATGTTTCAGCTTCTA  
ATTGTCTCTACTTTGTGAGACAACCTTTTGAATGCTTGACCTCAAATCAGGTAGGACTACC  
CGCTGAACTTAA

>ABC2-32

TTTCCGTAGGTGAACCTGCGGAAGGATCATTATTGAATTATGTTTCTAGATAGGTTGTAG  
CTGGCTCTTTTAGAGCATGTGCACGCCTGTTTGGACTTCATTTTCATCCACCTGTGCACC  
TATTGTAGTCTTTGGTTGGGTTAGGAGGAAGTGATCATTGTATCAGCATCTGCTGGGAGT  
GAGGACTTGCATTGTGAAAGCTTTGCTGTCCTTGATGTGATCATGGAATCTTTTTCTCAC  
TAGAGTCTATGTCACCTATTATACTCTGTGCAATGTCATTGAATGTCTTTACATGGGCTT  
GTATGCCTATGAAAATTGTAATACAACCTTTCAGCAACGGATCTCTTGGCTCTCGCATCGA  
TGAAGAACGCAGCGAAATGCGATAAGTAATGTGAATTGCAGAATTCAGTGAATCATCGAA  
TCTTTGAACGCATCTTGCGCTCCTTGGTATTCCGAGGAGCATGCCTGTTTGAGTGTCAAT  
AAATTCTCAACTCTCTTATAC-TTTTTTGTAAGAGAGCTTGGACTGTGGAGGCTTGCT  
GGCCACTTTTTGGGGTCAGCTCCTCTGAAATGCATTAGCGGAACCGTTTGCGATCTGCCA  
CAAGTGTGATAAGTTATCTACACTGGCGAGGGGATTGCTCTCTGTAATGTTTCAGCTTCTA  
ATTGTCTCTACTTTGTGAGACAACCTTTTGAATGCTTGACCTCAAATCAGGTAGGACTACC  
CGCTGAACTTAA

>ABC3-18

TTTCCGTAGGTGAACCTGCGGAAGGATCATTATTGAATTATGTTTCTAGATAGGTTGTAG  
CTGGCTCTTTTAGAGCATGTGCACGCCTGTTTGGACTTCATTTTCATCCACCTGTGCACC  
TATTGTAGTCTTTGGTTGGGTTAGGAGGAAGTGATCATTGTATCAGCATCTGCTGGGAGT  
GAGGACTTGCATTGTGAAAGCTTTGCTGTCCTTGATGTGATCATGGAATCTTTTTCTCAC  
TAGAGTCTATGTCACCTATTATACTCTGTGCAATGTCATTGAATGTCTTTACATGGGCTT  
GTATGCCTATGAAAATTGTAATACAACCTTTCAGCAACGGATCTCTTGGCTCTCGCATCGA  
TGAAGAACGCAGCGAAATGCGATAAGTAATGTGAATTGCAGAATTCAGTGAATCATCGAA  
TCTTTGAACGCATCTTGCGCTCCTTGGTATTCCGAGGAGCATGCCTGTTTGAGTGTCAAT  
AAATTCTCAACTCTCTTATAC-TTTTTTGTAAGAGAGCTTGGACTGTGGAGGCTTGCT  
GGCCACTTTTTGGGGTCAGCTCCTCTGAAATGCATTAGCGGAACCGTTTGCGATCTGCCA  
CAAGTGTGATAAGTTATCTACACTGGCGAGGGGATTGCTCTCTGTAATGTTTCAGCTTCTA



ATTGTCTCTACTTTGTGAGACAACTTTTGAATGCTTGACCTCAAATCAGGTAGGACTACC  
CGCTGAACTTAA

>ABC5-73

TTTCCGTAGGTGAACCTGCGGAAGGATCATTATTGAATTATGTTTCTAGATAGGTTGTAG  
CTGGCTCTTTTAGAGCATGTGCACGCCTGTTTGGACTTCATTTTCATCCACCTGTGCACC  
TATTGTAGTCTTTGGTTGGGTTAGGAGGAAGTGATCATTGTATCAGCATCTGCTGGGAGT  
GAGGACTTGCATTGTGAAAGCTTTGCTGTCCTTGATGTGATCATGGAATCTTTTTCTCAC  
TAGAGTCTATGTCACTCATTATACTCTGTGCAATGTCATTGAATGTCTTTACATGGGCTT  
GTATGCCTATGAAAATTGTAATAACAACCTTTCAGCAACGGATCTCTTGGCTCTCGCATCGA  
TGAAGAACGCAGCGAAATGCGATAAGTAATGTGAATTGCAGAATTCAGTGAATCATCGAA  
TCTTTGAACGCATCTTGCCTCCTTGGTATTCCGAGGAGCATGCCTGTTTGAGTGTCAAT  
AAATTCTCAACTCTCTTATAC-TTTTTGTAAAAGAGAGCTTGGACTGTGGAGGCTTGCT  
GGCCACTTTTTGGGGTCAGCTCCTCTGAAATGCATTAGCGGAACCGTTTGCGATCTGCCA  
CAAGTGTGATAAGTTATCTACACTGGCGAGGGGATTGCTCTCTGTAATGTTTCAGCTTCTA  
ATTGTCTCTACTTTGTGAGACAACTTTTGAATGCTTGACCTCAAATCAGGTAGGACTACC  
CGCTGAACTTAA

>ABC2-46

TTTCCGTAGGTGAACCTGCGGAAGGATCATTATTGAATTATGTTTCTAGATAGGTTGTAG  
CTGGCTCTTTTAGAGCATGTGCACGCCTGTTTGGACTTCATTTTCATCCACCTGTGCACC  
TATTGTAGTCTTTGGTTGGGTTAGGAGGAAGTGATCATTGTATCAGCATCTGCTGGGAGT  
GAGGACTTGCATTGTGAAAGCTTTGCTGTCCTTGATGTGATCATGGAATCTTTTTCTCAC  
TAGAGTCTATGTCACTCATTATACTCTGTGCAATGTCATTGAATGTCTTTACATGGGCTT  
GTATGCCTATGAAAATTGTAATAACAACCTTTCAGCAACGGATCTCTTGGCTCTCGCATCGA  
TGAAGAACGCAGCGAAATGCGATAAGTAATGTGAATTGCAGAATTCAGTGAATCATCGAA  
TCTTTGAACGCATCTTGCCTCCTTGGTATTCCGAGGAGCATGCCTGTTTGAGTGTCAAT  
AAATTCTCAACTCTCTTATAC-TTTTTGTAAAAGAGAGCTTGGACTGTGGAGGCTTGCT  
GGCCACTTTTTGGGGTCAGCTCCTCTGAAATGCATTAGCGGAACCGTTTGCAATCTGCCA  
CAAGTGTGATAAGTTATCTACACTGGCGAGGGGATTGCTCTCTGTAATGTTTCAGCTTCTA  
ATTGTCTCTACTTTGTGAGACAACTTTTGAATGCTTGACCTCAAATCAGGTAGGACTACC  
CGCTGAACTTAA

>ABC8-52

TTTCCGTAGGTGAACCTGCGGAAGGATCATTATTGAATTATGTTTCTAGATAGGTTGTAG  
CTGGCTCTTTTAGAGCATGTGCACGCCTGTTTGGACTTCATTTTCATCCACCTGTGCACC  
TATTGTAGTCTTTGGTTGGGTTAGGAGGAAGTGATCATTGTATCAGCATCTGCTGGGAGT  
GAGGACTTGCATTGTGAAAGCTTTGCTGTCCTTGATGTGATCATGGAATCTTTTTCTCAC  
TAGAGTCTATGTCACTCATTATACTCTGTGCAATGTCATTGAATGTCTTTACATGGGCTT  
GTATGCCTATGAAAATTGTAATAACAACCTTTCAGCAACGGATCTCTTGGCTCTCGCATCGA  
TGAAGAACGCAGCGAAATGCGATAAGTAATGTGAATTGCAGAATTCAGTGAATCATCGAA  
TCTTTGAACGCATCTTGCCTCCTTGGTATTCCGAGGAGCATGCCTGTTTGAGTGTCAAT  
AAATTCTCAACTCTCTTATAC-TTTTTGTAAAAGAGAGCTTGGACTGTGGAGGCTTGCT  
GGCCACTTTTTGGGGTCAGCTCCTCTGAAATGCATTAGCGGAACCGTTTGCAATCTGCCA  
CAAGTGTGATAAGTTATCTACACTGGCGAGGGGATTGCTCTCTGTAATGTTTCAGCTTCTA  
ATTGTCTCTACTTTGTGAGACAACTTTTGAATGCTTGACCTCAAATCAGGTAGGACTACC  
CGCTGAACTTAA

>ABC9-39

TTTCCGTAGGTGAACCTGCGGAAGGATCATTATTGAATTATGTTTCTAGATAGGTTGTAG  
CTGGCTCTTTTAGAGCATGTGCACGCCTGTTTGGACTTCATTTTCATCCACCTGTGCACC  
TATTGTAGTCTTTGGTTGGGTTAGGAGGAAGTGATCATTGTATCAGCATCTGCTGGGAGT  
GAGGACTTGCATTGTGAAAGCTTTGCTGTCCTTGATGTGATCATGGAATCTTTTTCTCAC  
TAGAGTCTATGTCACTCATTATACTCTGTGCAATGTCATTGAATGTCTTTACATGGGCTT



GTATGCCTATGAAAATTGTAATACAACCTTTTCAGCAACGGATCTCTTGGCTCTCGCATCGA  
TGAAGAACGCAGCGAAATGCGATAAGTAATGTGAATTGCAGAATTCAGTGAATCATCGAA  
TCTTTGAACGCATCTTGCCTCCTTGGTATTCCGAGGAGCATGCCTGTTTGAGTGTCAAT  
AAATTCTCAACTCTCTTATAC-TTTTTTGAAAAGAGAGCTTGGACTGTGGAGGCTTGCT  
GGCCACTTTTTGGGGTCAGCTCCTCTGAAATGCATTAGCGGAACCGTTTGCAATCTGCCA  
CAAGTGTGATAAGTTATCTACACTGGCGAGGGGATTGCTCTCTGTAATGTTTCAGCTTCTA  
ATTGTCTCTACTTTGTGAGACAACCTTTGAATGCTTGACCTCAAATCAGGTAGGACTACC  
CGCTGAACTTAA

>ABC9-51

TTTCCGTAGGTGAACCTGCGGAAGGATCATTATTGAATTATGTTTCTAGATAGGTTGTAG  
CTGGCTCTTTTAGAGCATGTGCACGCCTGTTTGGACTTCATTTTCATCCACCTGTGCACC  
TATTGTAGTCTTTGGTTGGGTTAGGAGGAAGTGATCATTGTATCAGCATCTGCTGGGAGT  
GAGGACTTGCATTGTGAAAGCTTTGCTGTCCTTGATGTGATCATGGAATCTTTTCTCAC  
TAGAGTCTATGTCACCTCATTATACTCTGTGCAATGTCATTGAATGTCTTTACATGGGCTT  
GTATGCCTATGAAAATTGTAATACAACCTTTTCAGCAACGGATCTCTTGGCTCTCGCATCGA  
TGAAGAACGCAGCGAAATGCGATAAGTAATGTGAATTGCAGAATTCAGTGAATCATCGAA  
TCTTTGAACGCATCTTGCCTCCTTGGTATTCCGAGGAGCATGCCTGTTTGAGTGTCAAT  
AAATTCTCAACTCTCTTATAC-TTTTTTGAAAAGAGAGCTTGGACTGTGGAGGCTTGCT  
GGCCACTTTTTGGGGTCAGCTCCTCTGAAATGCATTAGCGGAACCGTTTGCAATCTGCCA  
CAAGTGTGATAAGTTATCTACACTGGCGAGGGGATTGCTCTCTGTAATGTTTCAGCTTCTA  
ATTGTCTCTACTTTGTGAGACAACCTTTGAATGCTTGACCTCAAATCAGGTAGGACTACC  
CGCTGAACTTAA

>ABC10-37

TTTCCGTAGGTGAACCTGCGGAAGGATCATTATTGAATTATGTTTCTAGATAGGTTGTAG  
CTGGCTCTTTTAGAGCATGTGCACGCCTGTTTGGACTTCATTTTCATCCACCTGTGCACC  
TATTGTAGTCTTTGGTTGGGTTAGGAGGAAGTGATCATTGTATCAGCATCTGCTGGGAGT  
GAGGACTTGCATTGTGAAAGCTTTGCTGTCCTTGATGTGATCATGGAATCTTTTCTCAC  
TAGAGTCTATGTCACCTCATTATACTCTGTGCAATGTCATTGAATGTCTTTACATGGGCTT  
GTATGCCTATGAAAATTGTAATACAACCTTTTCAGCAACGGATCTCTTGGCTCTCGCATCGA  
TGAAGAACGCAGCGAAATGCGATAAGTAATGTGAATTGCAGAATTCAGTGAATCATCGAA  
TCTTTGAACGCATCTTGCCTCCTTGGTATTCCGAGGAGCATGCCTGTTTGAGTGTCAAT  
AAATTCTCAACTCTCTTATAC-TTTTTTGAAAAGAGAGCTTGGACTGTGGAGGCTTGCT  
GGCCACTTTTTGGGGTCAGCTCCTCTGAAATGCATTAGCGGAACCGTTTGCAATCTGCCA  
CAAGTGTGATAAGTTATCTACACTGGCGAGGGGATTGCTCTCTGTAATGTTTCAGCTTCTA  
ATTGTCTCTACTTTGTGAGACAACCTTTGAATGCTTGACCTCAAATCAGGTAGGACTACC  
CGCTGAACTTAA

>ABC11-22

TTTCCGTAGGTGAACCTGCGGAAGGATCATTATTGAATTATGTTTCTAGATAGGTTGTAG  
CTGGCTCTTTTAGAGCATGTGCACGCCTGTTTGGACTTCATTTTCATCCACCTGTGCACC  
TATTGTAGTCTTTGGTTGGGTTAGGAGGAAGTGATCATTGTATCAGCATCTGCTGGGAGT  
GAGGACTTGCATTGTGAAAGCTTTGCTGTCCTTGATGTGATCATGGAATCTTTTCTCAC  
TAGAGTCTATGTCACCTCATTATACTCTGTGCAATGTCATTGAATGTCTTTACATGGGCTT  
GTATGCCTATGAAAATTGTAATACAACCTTTTCAGCAACGGATCTCTTGGCTCTCGCATCGA  
TGAAGAACGCAGCGAAATGCGATAAGTAATGTGAATTGCAGAATTCAGTGAATCATCGAA  
TCTTTGAACGCATCTTGCCTCCTTGGTATTCCGAGGAGCATGCCTGTTTGAGTGTCAAT  
AAATTCTCAACTCTCTTATAC-TTTTTTGAAAAGAGAGCTTGGACTGTGGAGGCTTGCT  
GGCCACTTTTTGGGGTCAGCTCCTCTGAAATGCATTAGCGGAACCGTTTGCAATCTGCCA  
CAAGTGTGATAAGTTATCTACACTGGCGAGGGGATTGCTCTCTGTAATGTTTCAGCTTCTA  
ATTGTCTCTACTTTGTGAGACAACCTTTGAATGCTTGACCTCAAATCAGGTAGGACTACC  
CGCTGAACTTAA



>ABC12-35

TTTCCGTAGGTGAACCTGCGGAAGGATCATTATTGAATTATGTTTCTAGATAGGTTGTAG  
CTGGCTCTTTTAGAGCATGTGCACGCCTGTTTGGACTTCATTTTCATCCACCTGTGCACC  
TATTGTAGTCTTTGGTTGGGTTAGGAGGAAGTGATCATTGTATCAGCATCTGCTGGGAGT  
GAGGACTTGCATTGTGAAAGCTTTGCTGTCCTTGATGTGATCATGGAATCTTTTTCTCAC  
TAGAGTCTATGTCACCTCATTATACTCTGTGCGAATGTCATTGAATGTCTTTACATGGGCTT  
GTATGCCTATGAAAATTGTAATACAACCTTTCAGCAACGGATCTCTTGGCTCTCGCATCGA  
TGAAGAACGCAGCGAAATGCGATAAGTAATGTGAATTGCAGAATTCAGTGAATCATCGAA  
TCTTTGAACGCATCTTGCCTCCTTGGTATTCCGAGGAGCATGCCTGTTTGAGTGTCATT  
AAATTCTCAACTCTCTTATAC-TTTTTGTAAAAGAGAGCTTGGACTGTGGAGGCTTGCT  
GGCCACTTTTTGGGGTCAGCTCCTCTGAAATGCATTAGCGGAACCGTTTGCAATCTGCCA  
CAAGTGTGATAAGTTATCTACACTGGCGAGGGGATTGCTCTCTGTAATGTTTCAGCTTCTA  
ATTGTCTCTACTTTGTGAGACAACTTTTGAATGCTTGACCTCAAATCAGGTAGGACTACC  
CGCTGAACTTAA

>ABC7-29

TTTCCGTAGGTGAACCTGCGGAAGGATCATTATTGAATTATGTTTCTAGATAGGTTGTAG  
CTGGCTCTTTTAGAGCATGTGCACGCCTGTTTGGACTTCATTTTCATCCACCTGTGCACC  
TATTGTAGTCTTTGGTTGGGTTAGGAGGAAGTGATCATTGTATCAGCATCTGCTGGGAGT  
GAGGACTTGCATTGTGAAAGCTTTGCTGTCCTTGATGTGATCATGGAATCTTTTTCTCAC  
TAGAGTCTATGTCACCTCATTATACTCTGTGCGAATGTCATTGAATGTCTTTACATGGGCTT  
GTATGCCTATGAAAATTGTAATACAACCTTTCAGCAACGGATCTCTTGGCTCTCGCATCGA  
TGAAGGACGCAGCGAAATGCGATAAGTAATGTGAATTGCAGAATTCAGTGAATCATCGAA  
TCTTTGAACGCATCTTGCCTCCTTGGTATTCCGAGGAGCATGCCTGTTTGAGTGTCATT  
AAATTCTCAACTCTCTTATAC-TTTTTGTAAAAGAGAGCTTGGACTGTGGAGGCTTGCT  
GGCCACTTTTTGGGGTCAGCTCCTCTGAAATGCATTAGCGGAACCGTTTGCAATCTGCCA  
CAAGTGTGATAAGTTATCTACACTGGCGAGGGGATTGCTCTCTGTAATGTTTCAGCTTCTA  
ATTGTCTCTACTTTGTGAGACAACTTTTGAATGCTTGACCTCAAATCAGGTAGGACTACC  
CGCTGAACTTAA

>ABC10-15

TTTCCGTAGGTGAACCTGCGGAAGGATCATTATTGAATTATGTTTCTAGATAGGTTGTAG  
CTGGCTCTTTTAGAGCATGTGCACGCCTGTTTGGACTTCATTTTCATCCACCTGTGCACC  
TATTGTAGTCTTTGGTTGGGTTAGGAGGAAGTGATCATTGTATCAGCATCTGCTGGGAGT  
GAGGACTTGCATTGTGAAAGCTTTGCTGTCCTTGATGTGATCATGGAATCTTTTTCTCAC  
TAGAGTCTATGTCACCTCATTATACTCTGTGCGAATGTCATTGAATGTCTTTACATGGGCTT  
GTATGCCTATGAAAATTGTAATACAACCTTTCAGCAACGGATCTCTTGGCTCTCGCATCGA  
TGAAGGACGCAGCGAAATGCGATAAGTAATGTGAATTGCAGAATTCAGTGAATCATCGAA  
TCTTTGAACGCATCTTGCCTCCTTGGTATTCCGAGGAGCATGCCTGTTTGAGTGTCATT  
AAATTCTCAACTCTCTTATAC-TTTTTGTAAAAGAGAGCTTGGACTGTGGAGGCTTGCT  
GGCCACTTTTTGGGGTCAGCTCCTCTGAAATGCATTAGCGGAACCGTTTGCAATCTGCCA  
CAAGTGTGATAAGTTATCTACACTGGCGAGGGGATTGCTCTCTGTAATGTTTCAGCTTCTA  
ATTGTCTCTACTTTGTGAGACAACTTTTGAATGCTTGACCTCAAATCAGGTAGGACTACC  
CGCTGAACTTAA

>ABC6-52

TTTCCGTAGGTGAACCTGCGGAAGGATCATTATTGAATTATGTTTCTAGATAGGTTGTAG  
CTGGCTCTTTTAGAGCATGTGCACGCCTGTTTGGACTTCATTTTCATCCACCTGTGCACC  
TATTGTAGTCTTTGGTTGGGTTAGGAGGAAGTGATCATTGTATCAGCATCTGCTGGGAGT  
GAGGACTTGCATTGTGAAAGCTTTGCTGTCCTTGATGTGATCATGGAATCTTTTTCTCAC  
TAGAGTCTATGTCACCTCATTATACTCTGTGCGAATGTCATTGAATGTCTTTACATGGGCTT  
GTATGCCTATGAAAATTGTAATACAACCTTTCAGCAACGGATCTCTTGGCTCTCGCATCGA  
TGAAGGACGCAGCGAAATGCGATAAGTAATGTGAATTGCAGAATTCAGTGAATCATCGAA



TCTTTGAACGCATCTTGCGCTCCTTGGTATTCCGAGGAGCATGCCTGTTTGAGTGTCATT  
AAATTCTCAACTCTCTTATAC-TTTTTGTAAAAGAGAGCTTGGACTGTGGAGGCTTGCT  
GGCCACTTTTTGGGGTCAGCTCCTCTGAAATGCATTAGCGGAACCGTTTGCAATCTGCCA  
CAAGTGTGATAAGTTATCTACACTGGCGAGGGGATTGCTCTCTGTAATGTTTCAGCTTCTA  
ATTGTCTCTACTTTGTGAGACAACTTTGAATGCTTGACCTCAAATCAGGTAGGACTACC  
CGCTGAACTTAA

>ABC8-20

TTTCCGTAGGTGAACCTGCGGAAGGATCATTATTGAATTATGTTTCTAGATAGGTTGTAG  
CTGGCTCTTTTAGAGCATGTGCACGCCTGTTTGGACTTCATTTTCATCCACCTGTGCACC  
TATTGTAGTCTTTGGTTGGGTTAGGAGGAAGTGATCATTGTATCAGCATCTGCTGGGAGT  
GAGGACTTGCAATTGTGAAAGCTTTGCTGTCCTTGATGTGATCATGGAATCTCTTTCTCAC  
TAGAGTCTATGTCACTCATTATACTCTGTGCAATGTCATTGAATGTCTTTACATGGGCTT  
GTATGCCTATGAAAATTGTAATACAACCTTTAGCAACGGATCTCTTGGCTCTCGCATCGA  
TGAAGGACGCAGCGAAATGCGATAAGTAATGTGAATTGCAGAATTCAGTGAATCATCGAA  
TCTTTGAACGCATCTTGCGCTCCTTGGTATTCCGAGGAGCATGCCTGTTTGAGTGTCATT  
AAATTCTCAACTCTCTTATAC-TTTTTGTAAAAGAGAGCTTGGACTGTGGAGGCTTGCT  
GGCCACTTTTTGGGGTCAGCTCCTCTGAAATGCATTAGCGGAACCGTTTGCAATCTGCCA  
CAAGTGTGATAAGTTATCTACACTGGCGAGGGGATTGCTCTCTGTAATGTTTCAGCTTCTA  
ATTGTCTCTACTTTGTGAGACAACTTTGAATGCTTGACCTCAAATCAGGTAGGACTACC  
CGCTGAACTTAA

>ABC3-20

TTTCCGTAGGTGAACCTGCGGAAGGATCATTATTGAATTATGTTTCTAGATAGGTTGTAG  
CTGGCTCTTTTAGAGCATGTGCACGCCTGTTTGGACTTCATTTTCATCCACCTGTGCACC  
TATTGTAGTCTTTGGTTGGGTTAGGAGGAAGTGATCATTGTATCAGCATCTGCTGGGAGT  
GAGGACTTGCAATTGTGAAAGCTTTGCTGTCCTTGATGTGATCATGGAATCTCTTTCTCAC  
TAGAGTCTATGTCACTCATTATACTCTGTGCAATGTCATTGAATGTCTTTACATGGGCTT  
ATATGCCTATGAAAATTGTAATACAACCTTTAGCAACGGATCTCTTGGCTCTCGCATCGA  
TGAAGAACGCAGCGAAATGCGATAAGTAATGTGAATTGCAGAATTCAGTGAATCATCGAA  
TCTTTGAACGCATCTTGCGCTCCTTGGTATTCCGAGGAGCATGCCTGTTTGAGTGTCATT  
AAATTCTCAACTCTCTTATAC-TTTTTGTAAAAGAGAGCTTGGACTGTGGAGGCTTGCT  
GGCCACTTTTTGGGGTCAGCTCCTCTGAAATGCATTAGCGGAACCGTTTGCAATCTGCCA  
CAAGTGTGATAAGTTATCTACACTGGCGAGGGGATTGCTCTCTGTAATGTTTCAGCTTCTA  
ATTGTCTCTACTTTGTGAGACAACTTTGAATGCTTGACCTCAAATCAGGTAGGACTACC  
CGCTGAACTTAA

>ABC11-43

TTTCCGTAGGTGAACCTGCGGAAGGATCATTATTGAATTATGTTTCTAGATAGGTTGTAG  
CTGGCTCTTTTAGAGCATGTGCACGCCTGTTTGGACTTCATTTTCATCCACCTGTGCACC  
TATTGTAGTCTTTGGTTGGGTTAGGAGGAAGTGATCATTGTATCAGCATCTGCTGGGAGT  
GAGGACTTGCAATTGTGAAAGCTTTGCTGTCCTTGATGTGATCATGGAATCTCTTTCTCAC  
TAGAGTCTATGTCACTCATTATACTCTGTGCAATGTCATTGAATGTCTTTACATGGGCTT  
GTATGCCTATGAAAATTGTAATACAACCTTTAGCAACGGATCTCTTGGCTCTCGCATCGA  
TGAAGAACGCAGCGAAATGCGATAAGTAATGTGAATTGCAGAATTCAGTGAATCATCGAA  
TCTTTGAACGCATCTTGCGCTCCTTGGTATTCCGAGGAGCATGCCTGTTTGAGTGTCATT  
AAATTCTCAACTCTCTTATAC-TTTTTGTAAAAGAGAGCTTGGACTGTGGAGGCTTGCT  
GGCCACTTTTTGGGGTCAGCTCCTCTGAAATGCATTAGCGGAACCGTTTGCAATCTGCCA  
CAAGTGTGATAAGTTATCTACACTGGCGAGGGGATTGCTCTCTGTAATGTTTCAGCTTCTA  
ATTGTCTCTACTTTGTGAGACAACTTTGAATGCTTGACCTCAAATCAGGTAGGACTACC  
CGCTGAACTTAA

>ABC8-2

TTTCCGTAGGTGAACCTGCGGAAGGATCATTATTGAATTATGTTTCTAGATAGGTTGTAG



CTGGCTCTTTTAGAGCATGTGCACGCCTGTTTGGACTTCATTTTCATCCACCTGTGCACC  
TATTGTAGTCTTTGGTTGGGTTAGGAGGAAGTGGTCATTGTGTCAGCATCTGCTGGATGT  
GAGGACTTGCATTGTGAAAGCTTTGCTGTCCTTGATGTGATCATGGAATCTCTTTCTCAC  
TAGAGTCTATGTCACCTATTATACTCTGTGCAATGTCATTGAATGTCTTTACATGGGCTT  
ATATGCCTATGAAAATTGTAATACAACCTTTCAGCAACGGATCTCTTGGCTCTCGCATCGA  
TGAAGAACGCAGCGAAATGCGATAAGTAATGTGAATTGCAGAATTCAGTGAATCATCGAA  
TCTTTGAACGCATCTTGCCTCCTTGGTATTCCGAGGAGCATGCCTGTTTGAGTGTCAAT  
AAATTCTCAACTCTCTTATAC-TTTTTTGTAAGAGAGCTTGGACTGTGGAGGCTTGCT  
GGCCACTTTTTGGGGTCAGCTCCTCTGAAATGCATTAGCGGAACCGTTTGCGATCTGCCA  
CAAGTGTGATAAGTTATCTACACTGGCGAGGGGATTGCTCTCTGTAATGTTTCAGCTTCTA  
ATTGTCTCTACTTTGTGAGACTACTTTTGAATGCTTGACCTCAAATCAGGTAGGACTACC  
CGCTGAACTTAA

>ABC9-41

TTTCCGTAGGTGAACCTGCGGAAGGATCATTATTGAATTATGTTTCTAGATAGGTTGTAG  
CTGGCTCTTTTAGAGCATGTGCACGCCTGTTTGGACTTCATTTTCATCCACCTGTGCACC  
TATTGTAGTCTTTGGTTGGGTTAGGAGGAAGTGGTCATTGTGTCAGCATCTGCTGGATGT  
GAGGACTTGCATTGTGAAAGCTTTGCTGTCCTTGATGTGATCATGGAATCTCTTTCTCAC  
TAGAGTCTATGTCACCTATTATACTCTGTGCAATGTCATTGAATGTCTTTACATGGGCTT  
GTATGCCTATGAAAATTGTAATACAACCTTTCAGCAACGGATCTCTTGGCTCTCGCATCGA  
TGAAGAACGCAGCGAAATGCGATAAGTAATGTGAATTGCAGAATTCAGTGAATCATCGAA  
TCTTTGAACGCATCTTGCCTCCTTGGTATTCCGAGGAGCATGCCTGTTTGAGTGTCAAT  
AAATTCTCAACTCTCTTATAC-TTTTTTGTAAGAGAGCTTGGACTGTGGAGGCTTGCT  
GGCCACTTTTTGGGGTCAGCTCCTCTGAAATGCATTAGCGGAACCGTTTGCGATCTGCCA  
CAAGTGTGATAAGTTATCTACACTGGCGAGGGGATTGCTCTCTGTAATGTTTCAGCTTCTA  
ATTGTCTCTACTTTGTGAGACTACTTTTGAATGCTTGACCTCAAATCAGGTAGGACTACC  
CGCTGAACTTAA

>ABC5-44

TTTCCGTAGGTGAACCTGCGGAAGGATCATTATTGAATTATGTTTCTAGATAGGTTGTAG  
CTGGCTCTTTTAGAGCATGTGCACGCCTGTTTGGACTTCATTTTCATCCACCTGTGCACC  
TATTGTAGTCTTTGGTTGGGTTAGGGGGAAGTGGTCATTGTGTCAGCATCTGCTGGATGT  
GAGGACTTGCATTGTGAAAGCTTTGCTGTCCTTGATGTGATCATGGAATCTCTTTCTCAC  
TAGAGTCTATGTCACCTATTATACTCTGTGCAATGTCATTGAATGTCTTTACATGGGCTT  
ATATGCCTATGAAAATTGTAATACAACCTTTCAGCAACGGATCTCTTGGCTCTCGCATCGA  
TGAAGAACGCAGCGAAATGCGATAAGTAATGTGAATTGCAGAATTCAGTGAATCATCGAA  
TCTTTGAACGCATCTTGCCTCCTTGGTATTCCGAGGAGCATGCCTGTTTGAGTGTCAAT  
AAATTCTCAACTCTCTTATAC-TTTTTTGTAAGAGAGCTTGGACTGTGGAGGCTTGCT  
GGCCACTTTTTGGGGTCAGCTCCTCTGAAATGCATTAGCGGAACCGTTTGCGATCTGCCA  
CAAGTGTGATAAGTTATCTACACTGGCGAGGGGATTGCTCTCTGTAATGTTTCAGCTTCTA  
ATTGTCTCTACTTTGTGAGACTACTTTTGAATGCTTGACCTCAAATCAGGTAGGACTACC  
CGCTGAACTTAA

>ABC12-3

TTTCCGTAGGTGAACCTGCGGAAGGATCATTATTGAATTATGTTTCTAGATAGGTTGTAG  
CTGGCTCTTTTAGAGCATGTGCACGCCTGTTTGGACTTCATTTTCATCCACCTGTGCACC  
TATTGTAGTCTTTGGTTGGGTTAGGGGGAAGTGGTCATTGTGTCAGCATCTGCTGGATGT  
GAGGACTTGCATTGTGAAAGCTTTGCTGTCCTTGATGTGATCATGGAATCTTTTTCTCAC  
TAGAGTCTATGTCACCTATTATACTCTGTGCAATGTCATTGAATGTCTTTACATGGGCTT  
GTATGCCTATGAAAATTGTAATACAACCTTTCAGCAACGGATCTCTTGGCTCTCGCATCGA  
TGAAGAACGCAGCGAAATGCGATAAGTAATGTGAATTGCAGAATTCAGTGAATCATCGAA  
TCTTTGAACGCATCTTGCCTCCTTGGTATTCCGAGGAGCATGCCTGTTTGAGTGTCAAT  
AAATTCTCAACTCTCTTATAC-TTTTTTGTAAGAGAGCTTGGACTGTGGAGGCTTGCT



GGCCACTTTTTGGGGTCAGCTCCTCTGAAATGCATTAGCGGAACCGTTTGCGATCTGCCA  
CAAGTGTGATAAGTTATCTACACTGGCGAGGGGATTGCTCTCTGTAATGTTGAGCTTCTA  
ATTGTCTCTACTTTGTGAGACTACTTTTGAATGCTTGACCTCAAATCAGGTAGGACTACC  
CGCTGAACTTAA

>ABC7-50

TTTCCGTAGGTGAACCTGCGGAAGGATCATTATTGAATTATGTTTCTAGATAGGTTGTAG  
CTGGCTCTTTTAGAGCATGTGCACGCCTGTTTGGACTTCATTTTCATCCACCTGTGCACC  
TATTGTAGTCTTTGGTTGGGTTAGGAGGAAGTGGTCATTGTGTCAGCATCTGCTGGATGT  
GAGGACTTGCATTGTGAAAGCTTTGCTGTCCTTGATGTGATCATGGAATCTCTTTCTCAC  
TAGAGTCTATGTCACTCATTATACTCTGTGCAATGTCATTGAATGTCTTTACATGGGCTT  
ATATGCCTATGAAAATTGTAATAACAACCTTTGAGCAACGGATCTCTTGGCTCTCGCATCGA  
TGAAGAACGCAGCGAAATGCGATAAGTAATGTGAATTGCAGAATTCAGTGAATCATCGAA  
TCTTTGAACGCATCTTGCGCTCCTTGGTATTCCGAGGAGCATGCCTGTTTGAGTGTGATT  
AAATTCTCAACTCTCTTATAC-TTTTTGTAAAAGAGAGCTTGGACTGTGGAGGCTTGCT  
GGCCACTTTTTGGGGTCAGCTCCTCTGAAATGCATTAGCGGAACCGTTTGCAATCTGCCA  
CAAGTGTGATAAGTTATCTACACTGACGAGGGGATTGCTCTCTGTAATGTTGAGCTTCTA  
ATTGTCTCTACTTTGTGAGACTACTTTTGAATGCTTGACCTCAAATCAGGTAGGACTACC  
CGCTGAACTTAA

>ABC6-14

TTTCCGTAGGTGAACCTGCGGAAGGATCATTATTGAATTATGTTTCTAGATAGGTTGTAG  
CTGGCTCTTTTAGAGCATGTGCACGCCTGTTTGGACTTCATTTTCATCCACCTGTGCACC  
TATTGTAGTCTTTGGTTGGGTTAGGAGGAAGTGGTCATTGTGTCAGCATCTGCTGGATGT  
GAGGACTTGCATTGTGAAAGCTTTGCTGTCCTTGATGTGATCATGGAATCTCTTTCTCAC  
TAGAGTCTATGTCACTCATTATACTCTGTGCAATGTCATTGAATGTCTTTACATGGGCTT  
GTATGCCTATGAAAATTGTAATAACAACCTTTGAGCAACGGATCTCTTGGCTCTCGCATCGA  
TGAAGGACGCAGCGAAATGCGATAAGTAATGTGAATTGCAGAATTCAGTGAATCATCGAA  
TCTTTGAACGCATCTTGCGCTCCTTGGTATTCCGAGGAGCATGCCTGTTTGAGTGTGATT  
AAATTCTCAACTCTCTTATAC-TTTTTGTAAAAGAGAGCTTGGACTGTGGAGGCTTGCT  
GGCCACTTTTTGGGGTCAGCTCCTCTGAAATGCATTAGCGGAACCGTTTGCAATCTGCCA  
CAAGTGTGATAAGTTATCTACACTGGCGAGGGGATTGCTCTCTGTAATGTTGAGCTTCTA  
ATTGTCTCTACTTTGTGAGACAACCTTTTGAATGCTTGACCTCAAATCAGGTAGGACTACC  
CGCTGAACTTAA

>ABC12-24

TTTCCGTAGGTGAACCTGCGGAAGGATCATTATTGAATTATGTTTCTAGATAGGTTGTAG  
CTGGCTCTTTTAGAGCATGTGCACGCCTGTTTGGACTTCATTTTCATCCACCTGTGCACC  
TATTGTAGTCTTTGGTTGGGTTAGGAGGAAGTGGTCATTGTGTCAGCATCTGCTGGATGT  
GAGGACTTGCATTGTGAAAGCTTTGCTGTCCTTGATGTGATCATGGAATCTCTTTCTCAC  
TAGAGTCTATGTCACTCATTATACTCTGTGCAATGTCATTGAATGTCTTTACATGGGCTT  
GTATGCCTATGAAAATTGTAATAACAACCTTTGAGCAACGGATCTCTTGGCTCTCGCATCGA  
TGAAGGACGCAGCGAAATGCGATAAGTAATGTGAATTGCAGAATTCAGTGAATCATCGAA  
TCTTTGAACGCATCTTGCGCTCCTTGGTATTCCGAGGAGCATGCCTGTTTGAGTGTGATT  
AAATTCTCAACTCTCTTATAC-TTTTTGTAAAAGAGAGCTTGGACTGTGGAGGCTTGCT  
GGCCACTTTTTGGGGTCAGCTCCTCTGAAATGCATTAGCGGAACCGTTTGCAATCTGCCA  
CAAGTGTGATAAGTTATCTACACTGGCGAGGGGATTGCTCTCTGTAATGTTGAGCTTCTA  
ATTGTCTCTACTTTGTGAGACAACCTTTTGAATGCTTGACCTCAAATCAGGTAGGACTACC  
CGCTGAACTTAA

>ABC8-33

TTTCCGTAGGTGAACCTGCGGAAGGATCATTATTGAATTATGTTTCTAGATAGGTTGTAG  
CTGGCTCTTTTAGAGCATGTGCACGCCTGTTTGGACTTCATTTTCATCCACCTGTGCACC  
TATTGTAGTCTTTGGTTGGGTTAGGAGGAAGTGATCATTGTATCAGCATCTGCTGGATGT



GAGGACTTGCATTGTGAAAGCTTTGCTGTCCTTGATGTGATCATGGAATCTCTTTCTCAC  
TAGAGTCTATGTCACCTATTATACTCTGTGCAATGTCATTGAATGTCTTTACATGGGCTT  
GTATGCCTATGAAAATTGTAATACAACCTTTCAGCAACGGATCTCTTGGCTCTCGCATCGA  
TGAAGGACGCAGCGAAATGCGATAAGTAATGTGAATTGCAGAATTCAGTGAATCATCGAA  
TCTTTGAACGCATCTTGCGCTCCTTGGTATTCCGAGGAGCATGCCTGTTTGAGTGTCAAT  
AAATTCTCAACTCTCTTATAC-TTTTTTGTAAGAGAGCTTGGACTGTGGAGGCTTGCT  
GGCCACTTTTTGGGGTCAGCTCCTCTGAAATGCATTAGCGGAACCGTTTGCAATCTGCCA  
CAAGTGTGATAAGTTATCTACACTGGCGAGGGGATTGCTCTCTGTAATGTTTCACTTCTA  
ATTGTCTCTACTTTGTGAGACAACCTTTGAATGCTTGACCTCAAATCAGGTAGGACTACC  
CGCTGAACTTAA

>ABC9-10

TTTCCGTAGGTGAACCTGCGGAAGGATCATTATTGAATTATGTTTCTAGATAGGTTGTAG  
CTGGCTCTTTTAGAGCATGTGCACGCCTGTTTGGACTTCATTTTCATCCACCTGTGCACC  
TATTGTAGTCTTTGGTTGGGTTAGGAGGAAGTGGTCATTGTGTCAGCATCTGCTGGATGT  
GAGGACTTGCATTGTGAAAGCTTTGCTGTCCTTGATGTGATCATGGAATCTCTTTCTCAC  
TAGAGTCTATGTCACCTATTATACTCTGTGCAATGTCATTGAATGTCTTTACATGGGCTT  
ATATGCCTATGAAAATTGTAATACAACCTTTCAGCAACGGATCTCTTGGCTCTCGCATCGA  
TGAAGGACGCAGCGAAATGCGATAAGTAATGTGAATTGCAGAATTCAGTGAATCATCGAA  
TCTTTGAACGCATCTTGCGCTCCTTGGTATTCCGAGGAGCATGCCTGTTTGAGTGTCAAT  
AAATTCTCAACTCTCTTATAC-TTTTTTGTAAGAGAGCTTGGACTGTGGAGGCTTGCT  
GGCCACTTTTTGGGGTCAGCTCCTCTGAAATGCATTAGCGGAACCGTTTGCGATCTGCCA  
CAAGTGTGATAAGTTATCTACACTGGCGAGGGGATTGCTCTCTGTAATGTTTCACTTCTA  
ATTGTCTCTACTTTGTGAGACAACCTTTGAATGCTTGACCTCAAATCAGGTAGGACTACC  
CGCTGAACTTAA

>ABC7-35

TTTCCGTAGGTGAACCTGCGGAAGGATCATTATTGAATTATGTTTCTAGATAGGTTGTAG  
CTGGCTCTTTTAGAGCATGTGCACGCCTGTTTGGACTTCATTTTCATCCACCTGTGCACC  
TATTGTAGTCTTTGGTTGGGTTAGGAGGAAGTGGTCATTGTATCAGCATCTGCTGGGAGT  
GAGGACTTGCATTGTGAAAGCTTTGCTGTCCTTGATGTGATCATGGAATCTTTTTCTCAC  
TAGAGTCTATGTCACCTATTATACTCTGTGCAATGTCATTGAATGTCTTTACATGGGCTT  
GTATGCCTATGAAAATTGTAATACAACCTTTCAGCAACGGATCTCTTGGCTCTCGCATCGA  
TGAAGAACGCAGCGAAATGCGATAAGTAATGTGAATTGCAGAATTCAGTGAATCATCGAA  
TCTTTGAACGCATCTTGCGCTCCTTGGTATTCCGAGGAGCATGCCTGTTTGAGTGTCAAT  
AAATTCTCAACTCTCTTATACTTTTTTTGTAAGAGAGCTTGGACTGTGGAGGCTTGCT  
GGCCACTTTTTGGGGTCAGCTCCTCTGAAATGCATTAGCGGAACCGTTTGCGATCTGCCA  
CAAGTGTGATAAGTTATCTACACTGGCGAGGGGATTGCTCTCTGTAATGTTTCACTTCTA  
ATTGTCTCTACTTTGTGAGACAACCTTTGAATGCTTGACCTCAAATCAGGTAGGACTACC  
CGCTGAACTTAA

>ABC1-3

TTTCCGTAGGTGAACCTGCGGAAGGATCATTATTGAATTATGTTTCTAGATAGGTTGTAG  
CTGGCTC-TTTAGAGCATGTGCACGCCTGTTTGGACTTCATTTTCATCCACCTGTGCACC  
TATTGTAGTCTTTGGTTGGGTTAGGGGGAAGTGGTCATTGTGTCAGCATCTGCTGGATGT  
GAGGACTTGCATTGTGAAAGCTTTGCTGTCCTTGATGTGATCATGGAATCTCTTTCTCAC  
TAGAGTCTATGTCACCTATTATACTCTGTGCAATGTCATTGAATGTCTTTACATGGGCTT  
GTATGCCTATGAAAATTGTAATACAACCTTTCAGCAACGGATCTCTTGGCTCTCGCATCGA  
TGAAGGACGCAGCGAAATGCGATAAGTAATGTGAATTGCAGAATTCAGTGAATCATCGAA  
TCTTTGAACGCATCTTGCGCTCCTTGGTATTCCGAGGAGCATGCCTGTTTGAGTGTCAAT  
AAATTCTCAACTCTCTTATAC-TTTTTTGTAAGAGAGCTTGGACTGTGGAGGCTTGCT  
GGCCACTTTTTGGGGTCAGCTCCTCTGAAATGCATTAGCGGAACCGTTTGCAATCTGCCA  
CAAGTGTGATAAGTTATCTACACTGGCGAGGGGATTGCTCTCTGTAATGTTTCACTTCTA



ATTGTCTCTACTTTGTGAGACAACTTTTGAATGCTTGACCTCAAATCAGGTAGGACTACC  
CGCTGAACTTAA

>ABC5-47

TTTCCGTAGGTGAACCTGCGGAAGGATCATTATTGAATTATGTTTCTAGATAGGTTGTAG  
CTGGCTC-TTTAGAGCATGTGCACGCCTGTTTGGACTTCATTTTCATCCACCTGTGCACC  
TATTGTAGTCTTTGGTTGGGTTAGGGGGAAGTGGTCATTGTGTCAGCATCTGCTGGATGT  
GAGGACTTGCATTGTGAAAGCTTTGCTGTCCTTGATGTGATCATGGAATCTCTTTCTCAC  
TAGAGTCTATGTCACTCATTATACTCTGTGCAATGTCATTGAATGTCTTTACATGGGCTT  
GTATGCCTATGAAAATTGTAATAACAACCTTTCAGCAACGGATCTCTTGGCTCTCGCATCGA  
TGAAGGACGCAGCGAAATGCGATAAGTAATGTGAATTGCAGAATTCAGTGAATCATCGAA  
TCTTTGAACGCATCTTGCCTCCTTGGTATTCCGAGGAGCATGCCTGTTTGAGTGTCAAT  
AAATTCTCAACTCTCTTATAC-TTTTTGTAAAAGAGAGCTTGGACTGTGGAGGCTTGCT  
GGCCACTTTTTGGGGTCAGCTCCTCTGAAATGCATTAGCGGAACCGTTTGCAATCTGCCA  
CAAGTGTGATAAGTTATCTAAGTGGCGAGGGGATTGCTCTCTGTAATGTTTCAAGCTTCTA  
ATTGTCTCTACTTTGTGAGACAACTTTTGAATGCTTGACCTCAAATCAGGTAGGACTACC  
CGCTGAACTTAA

>ABC5-61

TTTCCGTAGGTGAACCTGCGGAAGGATCATTATTGAATTATGTTTCTAGATAGGTTGTAG  
CTGGCTC-TTTAGAGCATGTGCACGCCTGTTTGGACTTCATTTTCATCCACCTGTGCACC  
TATTGTAGTCTTTGGTTGGGTTAGGGGGAAGTGGTCATTGTGTCAGCATCTGCTGGATGT  
GAGGACTTGCATTGTGAAAGCTTTGCTGTCCTTGATGTGATCATGGAATCTCTTTCTCAC  
TAGAGTCTATGTCACTCATTATACTCTGTGCAATGTCATTGAATGTCTTTACATGGGCTT  
GTATGCCTATGAAAATTGTAATAACAACCTTTCAGCAACGGATCTCTTGGCTCTCGCATCGA  
TGAAGGACGCAGCGAAATGCGATAAGTAATGTGAATTGCAGAATTCAGTGAATCATCGAA  
TCTTTGAACGCATCTTGCCTCCTTGGTATTCCGAGGAGCATGCCTGTTTGAGTGTCAAT  
AAATTCTCAACTCTCTTATAC-TTTTTGTAAAAGAGAGCTTGGACTGTGGAGGCTTGCT  
GGCCACTTTTTGGGGTCAGCTCCTCTGAAATGCATTAGCGGAACCGTTTGCAATCTGCCA  
CAAGTGTGATAAGTTATCTAAGTGGCGAGGGGATTGCTCTCTGTAATGTTTCAAGCTTCTA  
ATTGTCTCTACTTTGTGAGACAACTTTTGAATGCTTGACCTCAAATCAGGTAGGACTACC  
CGCTGAACTTAA

>ABC9-3

TTTCCGTAGGTGAACCTGCGGAAGGATCATTATTGAATTATGTTTCTAGATAGGTTGTAG  
CTGGCTC-TTTAGAGCATGTGCACGCCTGTTTGGACTTCATTTTCATCCACCTGTGCACC  
TATTGTAGTCTTTGGTTGGGTTAGGGGGAAGTGGTCATTGTGTCAGCATCTGCTGGATGT  
GAGGACTTGCATTGTGAAAGCTTTGCTGTCCTTGATGTGATCATGGAATCTCTTTCTCAC  
TAGAGTCTATGTCACTCATTATACTCTGTGCAATGTCATTGAATGTCTTTACATGGGCTT  
GTATGCCTATGAAAATTGTAATAACAACCTTTCAGCAACGGATCTCTTGGCTCTCGCATCGA  
TGAAGGACGCAGCGAAATGCGATAAGTAATGTGAATTGCAGAATTCAGTGAATCATCGAA  
TCTTTGAACGCATCTTGCCTCCTTGGTATTCCGAGGAGCATGCCTGTTTGAGTGTCAAT  
AAATTCTCAACTCTCTTATAC-TTTTTGTAAAAGAGAGCTTGGACTGTGGAGGCTTGCT  
GGCCACTTTTTGGGGTCAGCTCCTCTGAAATGCATTAGCGGAACCGTTTGCAATCTGCCA  
CAAGTGTGATAAGTTATCTAAGTGGCGAGGGGATTGCTCTCTGTAATGTTTCAAGCTTCTA  
ATTGTCTCTACTTTGTGAGACAACTTTTGAATGCTTGACCTCAAATCAGGTAGGACTACC  
CGCTGAACTTAA

>ABC12-2

TTTCCGTAGGTGAACCTGCGGAAGGATCATTATTGAATTATGTTTCTAGATAGGTTGTAG  
CTGGCTC-TTTAGAGCATGTGCACGCCTGTTTGGACTTCATTTTCATCCACCTGTGCACC  
TATTGTAGTCTTTGGTTGGGTTAGGGGGAAGTGGTCATTGTGTCAGCATCTGCTGGATGT  
GAGGACTTGCATTGTGAAAGCTTTGCTGTCCTTGATGTGATCATGGAATCTCTTTCTCAC  
TAGAGTCTATGTCACTCATTATACTCTGTGCAATGTCATTGAATGTCTTTACATGGGCTT



GTATGCCTATGAAAATTGTAATACAACCTTTTCAGCAACGGATCTCTTGGCTCTCGCATCGA  
TGAAGGACGCAGCGAAATGCGATAAGTAATGTGAATTGCAGAATTCAGTGAATCATCGAA  
TCTTTGAACGCATCTTGCCTCCTTGGTATTCCGAGGAGCATGCCTGTTTGAGTGTCAAT  
AAATTCTCAACTCTCTTATAC-TTTTTTGAAAAGAGAGCTTGGACTGTGGAGGCTTGCT  
GGCCACTTTTTGGGGTCAGCTCCTCTGAAATGCATTAGCGGAACCGTTTGCAATCTGCCA  
CAAGTGTGATAAGTTATCTACACTGGCGAGGGGATTGCTCTCTGTAATGTTTCAGCTTCTA  
ATTGTCTCTACTTTGTGAGACAACCTTTGAATGCTTGACCTCAAATCAGGTAGGACTACC  
CGCTGAACTTAA

>ABC7-25

TTTCCGTAGGTGAACCTGCGGAAGGATCATTATTGAATTATGTTTCTAGATAGGTTGTAG  
CTGGCTC-TTLAGAGCATGTGCACGCCTGTTTGGACTTCATTTTCATCCACCTGTGCACC  
TATTGTAGTCTTTGGTTGGGTTAGGGGGAAGTGGTCATTGTGTCAGCATCTGCTGGATGT  
GAGGACTTGCATTGTGAAAGCTTTGCTGTCCTTGATGTGATCATGGAATCTCTTTCTCAC  
TAGAGTCTATGTCACCTCATTATACTCTGTGCGAATGTCATTGAATGTCTTTACATGGGCTT  
GTATGCCTATGAAAATTGTAATACAACCTTTTCAGCAACGGATCTCTTGGCTCTCGCATCGA  
TGAAGGACGCAGCGAAATGCGATAAGTAATGTGAATTGCAGAATTCAGTGAATCATCGAA  
TCTTTGAACGCATCTTGCCTCCTTGGTATTCCGAGGAGCATGCCTGTTTGAGTGTCAAT  
AAATTCTCAACTCTCTTATAC-TTTTTTGAAAAGAGAGCTTGGACTGTGGAGGCTTGCT  
GGCCACTTTTTGGGGTCAGCTCCTCTGAAATGCATTAGCGGAACCGTTTGCAATCTGCCA  
CAAGTGTGATAAGTTATCTACACTGGCGAGGGGATTGCTCTCTGTAATGTTTCAGCTTCTA  
ATTGTCTCTACTTTGTGAGACAACCTTTGAATGCTTGACCTCAAATCAGGTAGGACTACC  
CGCTGAACTTAA

>ABC7-7

TTTCCGTAGGTGAACCTGCGGAAGGATCATTATTGAATTATGTTTCTAGATAGGTTGTAG  
CTGGCTC-TTLAGAGCATGTGCACGCCTGTTTGGACTTCATTTTCATCCACCTGTGCACC  
TATTGTAGTCTTTGGTTGGGTTAGGGGGAAGTGGTCATTGTGTCAGCATCTGCTGGATGT  
GAGGACTTGCATTGTGAAAGCTTTGCTGTCCTTGATGTGATCATGGAATCTCTTTCTCAC  
TAGAGTCTATGTCACCTCATTATACTCTGTGCGAATGTCATTGAATGTCTTTACATGGGCTT  
GTATGCCTATGAAAATTGTAATACAACCTTTTCAGCAACGGATCTCTTGGCTCTCGCATCGA  
TGAAGGACGCAGCGAAATGCGATAAGTAATGTGAATTGCAGAATTCAGTGAATCATCGAA  
TCTTTGAACGCATCTTGCCTCCTTGGTATTCCGAGGAGCATGCCTGTTTGAGTGTCAAT  
AAATTCTCAACTCTCTTATAC-TTTTTTGAAAAGAGAGCTTGGACTGTGGAGGCTTGCT  
GGCCACTTTTTGGGGTCAGCTCCTCTGAAATGCATTAGCGGAACCGTTTGCAATCTGCCA  
CAAGTGTGATAAGTTATCTACACTGGCGAGGGGATTGCTCTCTGTAATGTTTCAGCTTCTA  
ATTGTCTCTACTTTGTGAGACAACCTTTGAATGCTTGACCTCAAATCAGGTAGGACTACC  
CGCTGAACTTAA

>ABC5-34

TTTCCGTAGGTGAACCTGCGGAAGGATCATTATTGAATTATGTTTCTAGATAGGTTGTAG  
CTGGCTC-TTLAGAGCATGTGCACGCCTGTTTGGACTTCATTTTCATCCACCTGTGCACC  
TATTGTAGTCTTTGGTTGGGTTAGGGGGAAGTGGTCATTGTGTCAGCATCTGCTGGATGT  
GAGGACTTGCATTGTGAAAGCTTTGCTGTCCTTGATGTGATCATGGAATCTCTTTCTCAC  
TAGAGTCTATGTCACCTCATTATACTCTGTGCGAATGTCATTGAATGTCTTTACATGGGCTT  
GTATGCCTATGAAAATTGTAATACAACCTTTTCAGCAACGGATCTCTTGGCTCTCGCATCGA  
TGAAGGACGCAGCGAAATGCGATAAGTAATGTGAATTGCAGAATTCAGTGAATCATCGAA  
TCTTTGAACGCATCTTGCCTCCTTGGTATTCCGAGGAGCATGCCTGTTTGAGTGTCAAT  
AAATTCTCAACTCTCTTATAC-TTTTTTGAAAAGAGAGCTTGGACTGTGGAGGCTTGCT  
GGCCACTTTTTGGGGTCAGCTCCTCTGAAATGCATTAGCGGAACCGTTTGCAATCTGCCA  
CAAGTGTGATAAGTTATCTACACTGGCGAGGGGATTGCTCTCTGTAATGTTTCAGCTTCTA  
ATTGTCTCTACTTTGTGAGACAACCTTTGAATGCTTGACCTCAAATCAGGTAGGACTACC  
CGCTGAACTTAA



>ABC12-29

TTTCCGTAGGTGAACCTGCGGAAGGATCATTATTGAATTATGTTTCTAGATAGGTTGTAG  
CTGGCTC-TTTAGAGCATGTGCACGCCTGTTTGGACTTCATTTTCATCCACCTGTGCACC  
TATTGTAGTCTTTGGTTGGGTTAGGGGGAAGTGGTCATTGTGTCAGCATCTGCTGGATGT  
GAGGACTTGCATTGTGAAAGCTTTGCTGTCCTTGATGTGATCATGGAATCTCTTTCTCAC  
TAGAGTCTATGTCACCTCATTATACTCTGTGCGAATGTCATTGAATGTCTTTACATGGGCTT  
GTATGCCTATGAAAATTGTAATACAACCTTTCAGCAACGGATCTCTTGGCTCTCGCATCGA  
TGAAGGACGCAGCGAAATGCGATAAGTAATGTGAATTGCAGAATTCAGTGAATCATCGAA  
TCTTTGAACGCATCTTGCGCTCCTTGGTATTCCGAGGAGCATGCCTGTTTGAGTGTCAAT  
AAATTCTCAACTCTCTTATAC-TTTTTGTAAAAGAGAGCTTGGACTGTGGAGGCTTGCT  
GGCCACTTTTTGGGGTCAGCTCCTCTGAAATGCATTAGCGGAACCGTTTGCAATCTGCCA  
CAAGTGTGATAAGTTATCTACACTGGCGAGGGGATTGCTCTCTGTAATGTTTCAGCTTCTA  
ATTGTCTCTACTTTGTGAGACAACTTTTGAATGCTTGACCTCAAATCAGGTAGGACTACC  
CGCTGAACTTAA

>ABC7-21

TTTCCGTAGGTGAACCTGCGGAAGGATCATTATTGAATTATGTTTCTAGATAGGTTGTAG  
CTGGCTC-TTTAGAGCATGTGCACGCCTGTTTGGACTTCATTTTCATCCACCTGTGCACC  
TATTGTAGTCTTTGGTTGGGTTAGGGGGAAGTGGTCATTGTGTCAGCATCTGCTGGATGT  
GAGGACTTGCATTGTGAAAGCTTTGCTGTCCTTGATGTGATCATGGAATCTCTTTCTCAC  
TAGAGTCTATGTCACCTCATTATACTCTGTGCGAATGTCATTGAATGTCTTTACATGGGCTT  
GTATGCCTATGAAAATTGTAATACAACCTTTCAGCAACGGATCTCTTGGCTCTCGCATCGA  
TGAAGGACGCAGCGAAATGCGATAAGTAATGTGAATTGCAGAATTCAGTGAATCATCGAA  
TCTTTGAACGCATCTTGCGCTCCTTGGTATTCCGAGGAGCATGCCTGTTTGAGTGTCAAT  
AAATTCTCAACTCTCTTATAC-TTTTTGTAAAAGAGAGCTTGGACTGTGGAGGCTTGCT  
GGCCACTTTTTGGGGTCAGCTCCTCTGAAATGCATTAGCGGAACCGTTTGCAATCTGCCA  
CAAGTGTGATAAGTTATCTACACTGGCGAGGGGATTGCTCTCTGTAATGTTTCAGCTTCTA  
ATTGTCTCTACTTTGTGAGACAACTTTTGAATGCTTGACCTCAAATCAGGTAGGACTACC  
CGCTGAACTTAA

>ABC5-36

TTTCCGTAGGTGAACCTGCGGAAGGATCATTATTGAATTATGTTTCTAGATAGGTTGTAG  
CTGGCTC-TTTAGAGCATGTGCACGCCTGTTTGGACTTCATTTTCATCCACCTGTGCACC  
TATTGTAGTCTTTGGTTGGGTTAGGGGGAAGTGGTCATTGTGTCAGCATCTGCTGGATGT  
GAGGACTTGCATTGTGAAAGCTTTGCTGTCCTTGATGTGATCATGGAATCTCTTTCTCAC  
TAGAGTCTATGTCACCTCATTATACTCTGTGCGAATGTCATTGAATGTCTTTACATGGGCTT  
GTATGCCTATGAAAATTGTAATACAACCTTTCAGCAACGGATCTCTTGGCTCTCGCATCGA  
TGAAGGACGCAGCGAAATGCGATAAGTAATGTGAATTGCAGAATTCAGTGAATCATCGAA  
TCTTTGAACGCATCTTGCGCTCCTTGGTATTCCGAGGAGCATGCCTGTTTGAGTGTCAAT  
AAATTCTCAACTCTCTTATAC-TTTTTGTAAAAGAGAGCTTGGACTGTGGAGGCTTGCT  
GGCCACTTTTTGGGGTCAGCTCCTCTGAAATGCATTAGCGGAACCGTTTGCAATCTGCCA  
CAAGTGTGATAAGTTATCTACACTGGCGAGGGGATTGCTCTCTGTAATGTTTCAGCTTCTA  
ATTGTCTCTACTTTGTGAGACAACTTTTGAATGCTTGACCTCAAATCAGGTAGGACTACC  
CGCTGAACTTAA

>ABC8-45

TTTCCGTAGGTGAACCTGCGGAAGGATCATTATTGAATTATGTTTCTAGATAGGTTGTAG  
CTGGCTC-TTTAGAGCATGTGCACGCCTGTTTGGACTTCATTTTCATCCACCTGTGCACC  
TATTGTAGTCTTTGGTTGGGTTAGGGGGAAGTGGTCATTGTGTCAGCATCTGCTGGATGT  
GAGGACTTGCATTGTGAAAGCTTTGCTGTCCTTGATGTGATCATGGAATCTCTTTCTCAC  
TAGAGTCTATGTCACCTCATTATACTCTGTGCGAATGTCATTGAATGTCTTTACATGGGCTT  
GTATGCCTATGAAAATTGTAATACAACCTTTCAGCAACGGATCTCTTGGCTCTCGCATCGA  
TGAAGGACGCAGCGAAATGCGATAAGTAATGTGAATTGCAGAATTCAGTGAATCATCGAA



TCTTTGAACGCATCTTGCGCTCCTTGGTATTCCGAGGAGCATGCCTGTTTGAGTGTCAATT  
AAATTCTCAACTCTCTTATAC-TTTTTGTAAAAGAGAGCTTGGACTGTGGAGGCTTGCT  
GGCCACTTTTTGGGGTCAGCTCCTCTGAAATGCATTAGCGGAACCGTTTGCAATCTGCCA  
CAAGTGTGATAAGTTATCTACACTGGCGAGGGGATTGCTCTCTGTAATGTTTCAGCTTCTA  
ATTGTCTCTACTTTGTGAGACAACTTTTGAATGCTTGACCTCAAATCAGGTAGGACTACC  
CGCTGAACTTAA

>ABC7-46

TTTCCGTAGGTGAACCTGCGGAAGGATCATTATTGAATTATGTTTCTAGATAGGTTGTAG  
CTGGCTC-TTTAGAGCATGTGCACGCCTGTTTGGACTTCATTTTCATCCACCTGTGCACC  
TATTGTAGTCTTTGGTTGGGTTAGGGGGAAGTGGTCATTGTGTCAGCATCTGCTGGATGT  
GAGGACTTGCAATTGTGAAAGCTTTGCTGTCCTTGATGTGATCATGGAATCTCTTTCTCAC  
TAGAGTCTATGTCACTCATTATACTCTGTGCAATGTCATTGAATGTCTTTACATGGGCTT  
GTATGCCTATGAAAATTGTAATACAACCTTTTCAGCAACGGATCTCTTGGCTCTCGCATCGA  
TGAAGGACGCAGCGAAATGCGATAAGTAATGTGAATTGCAGAATTCAGTGAATCATCGAA  
TCTTTGAACGCATCTTGCGCTCCTTGGTATTCCGAGGAGCATGCCTGTTTGAGTGTCAATT  
AAATTCTCAACTCTCTTATAC-TTTTTGTAAAAGAGAGCTTGGACTGTGGAGGCTTGCT  
GGCCACTTTTTGGGGTCAGCTCCTCTGAAATGCATTAGCGGAACCGTTTGCAATCTGCCA  
CAAGTGTGATAAGTTATCTACACTGGCGAGGGGATTGCTCTCTGTAATGTTTCAGCTTCTA  
ATTGTCTCTACTTTGTGAGACAACTTTTGAATGCTTGACCTCAAATCAGGTAGGACTACC  
CGCTGAACTTAA

>ABC11-36

TTTCCGTAGGTGAACCTGCGGAAGGATCATTATTGAATTATGTTTCTAGATAGGTTGTAG  
CTGGCTC-TTTAGAGCATGTGCACGCCTGTTTGGACTTCATTTTCATCCACCTGTGCACC  
TATTGTAGTCTTTGGTTGGGTTAGGGGGAAGTGGTCATTGTGTCAGCATCTGCTGGATGT  
GAGGACTTGCAATTGTGAAAGCTTTGCTGTCCTTGATGTGATCATGGAATCTCTTTCTCAC  
TAGAGTCTATGTCACTCATTATACTCTGTGCAATGTCATTGAATGTCTTTACATGGGCTT  
GTATGCCTATGAAAATTGTAATACAACCTTTTCAGCAACGGATCTCTTGGCTCTCGCATCGA  
TGAAGGACGCAGCGAAATGCGATAAGTAATGTGAATTGCAGAATTCAGTGAATCATCGAA  
TCTTTGAACGCATCTTGCGCTCCTTGGTATTCCGAGGAGCATGCCTGTTTGAGTGTCAATT  
AAATTCTCAACTCTCTTATAC-TTTTTGTAAAAGAGAGCTTGGACTGTGGAGGCTTGCT  
GGCCACTTTTTGGGGTCAGCTCCTCTGAAATGCATTAGCGGAACCGTTTGCAATCTGCCA  
CAAGTGTGATAAGTTATCTACACTGGCGAGGGGATTGCTCTCTGTAATGTTTCAGCTTCTA  
ATTGTCTCTACTTTGTGAGACAACTTTTGAATGCTTGACCTCAAATCAGGTAGGACTACC  
CGCTGAACTTAA

>ABC12-47

TTTCCGTAGGTGAACCTGCGGAAGGATCATTATTGAATTATGTTTCTAGATAGGTTGTAG  
CTGGCTC-TTTAGAGCATGTGCACGCCTGTTTGGACTTCATTTTCATCCACCTGTGCACC  
TATTGTAGTCTTTGGTTGGGTTAGGGGGAAGTGGTCATTGTGTCAGCATCTGCTGGATGT  
GAGGACTTGCAATTGTGAAAGCTTTGCTGTCCTTGATGTGATCATGGAATCTCTTTCTCAC  
TAGAGTCTATGTCACTCATTATACTCTGTGCAATGTCATTGAATGTCTTTACATGGGCTT  
GTATGCCTATGAAAATTGTAATACAACCTTTTCAGCAACGGATCTCTTGGCTCTCGCATCGA  
TGAAGGACGCAGCGAAATGCGATAAGTAATGTGAATTGCAGAATTCAGTGAATCATCGAA  
TCTTTGAACGCATCTTGCGCTCCTTGGTATTCCGAGGAGCATGCCTGTTTGAGTGTCAATT  
AAATTCTCAACTCTCTTATAC-TTTTTGTAAAAGAGAGCTTGGACTGTGGAGGCTTGCT  
GGCCACTTTTTGGGGTCAGCTCCTCTGAAATGCATTAGCGGAACCGTTTGCAATCTGCCA  
CAAGTGTGATAAGTTATCTACACTGGCGAGGGGATTGCTCTCTGTAATGTTTCAGCTTCTA  
ATTGTCTCTACTTTGTGAGACAACTTTTGAATGCTTGACCTCAAATCAGGTAGGACTACC  
CGCTGAACTTAA

>ABC5-18

TTTCCGTAGGTGAACCTGCGGAAGGATCATTATTGAATTATGTTTCTAGATAGGTTGTAG



CTGGCTC-TTTAGAGCATGTGCACGCCTGTTTGGACTTCATTTTCATCCACCTGTGCACC  
TATTGTAGTCTTTGGTTGGGTTAGGGGGAAGTGGTCATTGTGTCAGCATCTGCTGGATGT  
GAGGACTTGCATTGTGAAAGCTTTGCTGTCCTTGATGTGATCATGGAATCTCTTTCTCAC  
TAGAGTCTATGTCACCTATTATACTCTGTGCAATGTCATTGAATGTCTTTACATGGGCTT  
GTATGCCTATGAAAATTGTAATACAACCTTTCAGCAACGGATCTCTTGGCTCTCGCATCGA  
TGAAGGACGCAGCGAAATGCGATAAGTAATGTGAATTGCAGAATTCAGTGAATCATCGAA  
TCTTTGAACGCATCTTGCCTCCTTGGTATTCCGAGGAGCATGCCTGTTTGAGTGTCAAT  
AAATTCTCAACTCTCTTATAC-TTTTTTGTAAGAGAGCTTGGACTGTGGAGGCTTGCT  
GGCCACTTTTTGGGGTCAGCTCCTCTGAAATGCATTAGCGGAACCGTTTGCAATCTGCCA  
CAAGTGTGATAAGTTATCTACACTGGCGAGGGGATTGCTCTCTGTAATGTTGAGCTTCTA  
ATTGTCTCTACTTTGTGAGACAACCTTTGAATGCTTGACCTCAAATCAGGTAGGACTACC  
CGCTGAACTTAA

>ABC5-50

TTTCCGTAGGTGAACCTGCGGAAGGATCATTATTGAATTATGTTTCTAGATAGGTTGTAG  
CTGGCTC-TTTAGAGCATGTGCACGCCTGTTTGGACTTCATTTTCATCCACCTGTGCACC  
TATTGTAGTCTTTGGTTGGGTTAGGGGGAAGTGGTCATTGTGTCAGCATCTGCTGGATGT  
GAGGACTTGCATTGTGAAAGCTTTGCTGTCCTTGATGTGATCATGGAATCTCTTTCTCAC  
TAGAGTCTATGTCACCTATTATACTCTGTGCAATGTCATTGAATGTCTTTACATGGGCTT  
GTATGCCTATGAAAATTGTAATACAACCTTTCAGCAACGGATCTCTTGGCTCTCGCATCGA  
TGAAGGACGCAGCGAAATGCGATAAGTAATGTGAATTGCAGAATTCAGTGAATCATCGAA  
TCTTTGAACGCATCTTGCCTCCTTGGTATTCCGAGGAGCATGCCTGTTTGAGTGTCAAT  
AAATTCTCAACTCTCTTATAC-TTTTTTGTAAGAGAGCTTGGACTGTGGAGGCTTGCT  
GGCCACTTTTTGGGGTCAGCTCCTCTGAAATGCATTAGCGGAACCGTTTGCAATCTGCCA  
CAAGTGTGATAAGTTATCTACACTGGCGAGGGGATTGCTCTCTGTAATGTTGAGCTTCTA  
ATTGTCTCTACTTTGTGAGACAACCTTTGAATGCTTGACCTCAAATCAGGTAGGACTACC  
CGCTGAACTTAA

>ABC11-28

TTTCCGTAGGTGAACCTGCGGAAGGATCATTATTGAATTATGTTTCTAGATAGGTTGTAG  
CTGGCTC-TTTAGAGCATGTGCACGCCTGTTTGGACTTCATTTTCATCCACCTGTGCACC  
TATTGTAGTCTTTGGTTGGGTTAGGGGGAAGTGGTCATTGTGTCAGCATCTGCTGGATGT  
GAGGACTTGCATTGTGAAAGCTTTGCTGTCCTTGATGTGATCATGGAATCTCTTTCTCAC  
TAGAGTCTATGTCACCTATTATACTCTGTGCAATGTCATTGAATGTCTTTACATGGGCTT  
GTATGCCTATGAAAATTGTAATACAACCTTTCAGCAACGGATCTCTTGGCTCTCGCATCGA  
TGAAGGACGCAGCGAAATGCGATAAGTAATGTGAATTGCAGAATTCAGTGAATCATCGAA  
TCTTTGAACGCATCTTGCCTCCTTGGTATTCCGAGGAGCATGCCTGTTTGAGTGTCAAT  
AAATTCTCAACTCTCTTATAC-TTTTTTGTAAGAGAGCTTGGACTGTGGAGGCTTGCT  
GGCCACTTTTTGGGGTCAGCTCCTCTGAAATGCATTAGCGGAACCGTTTGCAATCTGCCA  
CAAGTGTGATAAGTTATCTACACTGGCGAGGGGATTGCTCTCTGTAATGTTGAGCTTCTA  
ATTGTCTCTACTTTGTGAGACAACCTTTGAATGCTTGACCTCAAATCAGGTAGGACTACC  
CGCTGAACTTAA

>ABC1-6

TTTCCGTAGGTGAACCTGCGGAAGGATCATTATTGAATTATGTTTCTAGATAGGTTGTAG  
CTGGCTC-TTTAGAGCATGTGCACGCCTGTTTGGACTTCATTTTCATCCACCTGTGCACC  
TATTGTAGTCTTTGGTTGGGTTAGGGGGAAGTGGTCATTGTGTCAGCATCTGCTGGATGT  
GAGGACTTGCATTGTGAAAGCTTTGCTGTCCTTGATGTGATCATGGAATCTCTTTCTCAC  
TAGAGTCTATGTCACCTATTATACTCTGTGCAATGTCATTGAATGTCTTTACATGGGCTT  
GTATGCCTATGAAAATTGTAATACAACCTTTCAGCAACGGATCTCTTGGCTCTCGCATCGA  
TGAAGGACGCAGCGAAATGCGATAAGTAATGTGAATTGCAGAATTCAGTGAATCATCGAA  
TCTTTGAACGCATCTTGCCTCCTTGGTATTCCGAGGAGCATGCCTGTTTGAGTGTCAAT  
AAATTCTCAACTCTCTTATAC-TTTTTTGTAAGAGAGCTTGGACTGTGGAGGCTTGCT



GGCCACTTTTTGGGGTCAGCTCCTCTGAAATGCATTAGCGGAACCGTTTGCAATCTGCCA  
CAAGTGTGATAAGTTATCTACACTGGCGAGGGGATTGCTCTCTGTAATGTTGAGCTTCTA  
ATTGTCTCTACTTTGTGAGACAACTTTGAATGCTTGACCTCAAATCAGGTAGGACTACC  
CGCTGAACTTAA

>ABC1-10

TTTCCGTAGGTGAACCTGCGGAAGGATCATTATTGAATTATGTTTCTAGATAGGTTGTAG  
CTGGCTC-TTTAGAGCATGTGCACGCCTGTTTGGACTTCATTTTCATCCACCTGTGCACC  
TATTGTAGTCTTTGGTTGGGTTAGGGGGAAGTGGTCATTGTGTCAGCATCTGCTGGATGT  
GAGGACTTGCATTGTGAAAGCTTTGCTGTCCTTGATGTGATCATGGAATCTCTTTCTCAC  
TAGAGTCTATGTCACTCATTATACTCTGTGCAATGTCATTGAATGTCTTTACATGGGCTT  
GTATGCCTATGAAAATTGTAATACTTTTTCAGCAACGGATCTCTTGGCTCTCGCATCGA  
TGAAGGACGCAGCGAAATGCGATAAGTAATGTGAATTGCAGAATTCAGTGAATCATCGAA  
TCTTTGAACGCATCTTGCGCTCCTTGGTATTCCGAGGAGCATGCCTGTTTGAGTGTGATT  
AAATTCTCAACTCTCTTATAC-TTTTTGTAAAAGAGAGCTTGGACTGTGGAGGCTTGCT  
GGCCACTTTTTGGGGTCAGCTCCTCTGAAATGCATTAGCGGAACCGTTTGCAATCTGCCA  
CAAGTGTGATAAGTTATCTACACTGGCGAGGGGATTGCTCTCTGTAATGTTGAGCTTCTA  
ATTGTCTCTACTTTGTGAGACAACTTTGAATGCTTGACCTCAAATCAGGTAGGACTACC  
CGCTGAACTTAA

>ABC1-17

TTTCCGTAGGTGAACCTGCGGAAGGATCATTATTGAATTATGTTTCTAGATAGGTTGTAG  
CTGGCTC-TTTAGAGCATGTGCACGCCTGTTTGGACTTCATTTTCATCCACCTGTGCACC  
TATTGTAGTCTTTGGTTGGGTTAGGGGGAAGTGGTCATTGTGTCAGCATCTGCTGGATGT  
GAGGACTTGCATTGTGAAAGCTTTGCTGTCCTTGATGTGATCATGGAATCTCTTTCTCAC  
TAGAGTCTATGTCACTCATTATACTCTGTGCAATGTCATTGAATGTCTTTACATGGGCTT  
GTATGCCTATGAAAATTGTAATACTTTTTCAGCAACGGATCTCTTGGCTCTCGCATCGA  
TGAAGGACGCAGCGAAATGCGATAAGTAATGTGAATTGCAGAATTCAGTGAATCATCGAA  
TCTTTGAACGCATCTTGCGCTCCTTGGTATTCCGAGGAGCATGCCTGTTTGAGTGTGATT  
AAATTCTCAACTCTCTTATAC-TTTTTGTAAAAGAGAGCTTGGACTGTGGAGGCTTGCT  
GGCCACTTTTTGGGGTCAGCTCCTCTGAAATGCATTAGCGGAACCGTTTGCAATCTGCCA  
CAAGTGTGATAAGTTATCTACACTGGCGAGGGGATTGCTCTCTGTAATGTTGAGCTTCTA  
ATTGTCTCTACTTTGTGAGACAACTTTGAATGCTTGACCTCAAATCAGGTAGGACTACC  
CGCTGAACTTAA

>ABC1-1

TTTCCGTAGGTGAACCTGCGGAAGGATCATTATTGAATTATGTTTCTAGATAGGTTGTAG  
CTGGCTC-TTTAGAGCATGTGCACGCCTGTTTGGACTTCATTTTCATCCACCTGTGCACC  
TATTGTAGTCTTTGGTTGGGTTAGGGGGAAGTGGTCATTGTGTCAGCATCTGCTGGATGT  
GAGGACTTGCATTGTGAAAGCTTTGCTGTCCTTGATGTGATCATGGAATCTCTTTCTCAC  
TAGAGTCTATGTCACTCATTATACTCTGTGCAATGTCATTGAATGTCTTTACATGGGCTT  
GTATGCCTATGAAAATTGTAATACTTTTTCAGCAACGGATCTCTTGGCTCTCGCATCGA  
TGAAGGACGCAGCGAAATGCGATAAGTAATGTGAATTGCAGAATTCAGTGAATCATCGAA  
TCTTTGAACGCATCTTGCGCTCCTTGGTATTCCGAGGAGCATGCCTGTTTGAGTGTGATT  
AAATTCTCAACTCTCTTATAC-TTTTTGTAAAAGAGAGCTTGGACTGTGGAGGCTTGCT  
GGCCACTTTTTGGGGTCAGCTCCTCTGAAATGCATTAGCGGAACCGTTTGCAATCTGCCA  
CAAGTGTGATAAGTTATCTACACTGGCGAGGGGATTGCTCTCTGTAATGTTGAGCTTCTA  
ATTGTCTCTACTTTGTGAGACAACTTTGAATGCTTGACCTCAAATCAGGTAGGACTACC  
CGCTGAACTTAA

>ABC1-59

TTTCCGTAGGTGAACCTGCGGAAGGATCATTATTGAATTATGTTTCTAGATAGGTTGTAG  
CTGGCTC-TTTAGAGCATGTGCACGCCTGTTTGGACTTCATTTTCATCCACCTGTGCACC  
TATTGTAGTCTTTGGTTGGGTTAGGGGGAAGTGGTCATTGTGTCAGCATCTGCTGGATGT



GAGGACTTGCATTGTGAAAGCTTTGCTGTCCTTGATGTGATCATGGAATCTCTTTCTCAC  
TAGAGTCTATGTCACCTATTATACTCTGTGCAATGTCATTGAATGTCTTTACATGGGCTT  
GTATGCCTATGAAAATTGTAATACAACCTTTCAGCAACGGATCTCTTGGCTCTCGCATCGA  
TGAAGGACGCAGCGAAATGCGATAAGTAATGTGAATTGCAGAATTCAGTGAATCATCGAA  
TCTTTGAACGCATCTTGCGCTCCTTGGTATTCCGAGGAGCATGCCTGTTTGAGTGTCAAT  
AAATTCTCAACTCTCTTATAC-TTTTTTGTAAGAGAGCTTGGACTGTGGAGGCTTGCT  
GGCCACTTTTTGGGGTCAGCTCCTCTGAAATGCATTAGCGGAACCGTTTGCAATCTGCCA  
CAAGTGTGATAAGTTATCTACACTGGCGAGGGGATTGCTCTCTGTAATGTTTCACTTCTA  
ATTGTCTCTACTTTGTGAGACAACCTTTGAATGCTTGACCTCAAATCAGGTAGGACTACC  
CGCTGAACTTAA

>ABC4-58

TTTCCGTAGGTGAACCTGCGGAAGGATCATTATTGAATTATGTTTCTAGATAGGTTGTAG  
CTGGCTC-TTLAGAGCATGTGCACGCCTGTTTGGACTTCATTTTCATCCACCTGTGCACC  
TATTGTAGTCTTTGGTTGGGTTAGGGGGAAGTGGTCATTGTGTCAGCATCTGCTGGATGT  
GAGGACTTGCATTGTGAAAGCTTTGCTGTCCTTGATGTGATCATGGAATCTCTTTCTCAC  
TAGAGTCTATGTCACCTATTATACTCTGTGCAATGTCATTGAATGTCTTTACATGGGCTT  
GTATGCCTATGAAAATTGTAATACAACCTTTCAGCAACGGATCTCTTGGCTCTCGCATCGA  
TGAAGGACGCAGCGAAATGCGATAAGTAATGTGAATTGCAGAATTCAGTGAATCATCGAA  
TCTTTGAACGCATCTTGCGCTCCTTGGTATTCCGAGGAGCATGCCTGTTTGAGTGTCAAT  
AAATTCTCAACTCTCTTATAC-TTTTTTGTAAGAGAGCTTGGACTGTGGAGGCTTGCT  
GGCCACTTTTTGGGGTCAGCTCCTCTGAAATGCATTAGCGGAACCGTTTGCAATCTGCCA  
CAAGTGTGATAAGTTATCTACACTGGCGAGGGGATTGCTCTCTGTAATGTTTCACTTCTA  
ATTGTCTCTACTTTGTGAGACAACCTTTGAATGCTTGACCTCAAATCAGGTAGGACTACC  
CGCTGAACTTAA

>ABC6-15

TTTCCGTAGGTGAACCTGCGGAAGGATCATTATTGAATTATGTTTCTAGATAGGTTGTAG  
CTGGCTC-TTLAGAGCATGTGCACGCCTGTTTGGACTTCATTTTCATCCACCTGTGCACC  
TATTGTAGTCTTTGGTTGGGTTAGGGGGAAGTGGTCATTGTGTCAGCATCTGCTGGATGT  
GAGGACTTGCATTGTGAAAGCTTTGCTGTCCTTGATGTGATCATGGAATCTCTTTCTCAC  
TAGAGTCTATGTCACCTATTATACTCTGTGCAATGTCATTGAATGTCTTTACATGGGCTT  
GTATGCCTATGAAAATTGTAATACAACCTTTCAGCAACGGATCTCTTGGCTCTCGCATCGA  
TGAAGGACGCAGCGAAATGCGATAAGTAATGTGAATTGCAGAATTCAGTGAATCATCGAA  
TCTTTGAACGCATCTTGCGCTCCTTGGTATTCCGAGGAGCATGCCTGTTTGAGTGTCAAT  
AAATTCTCAACTCTCTTATAC-TTTTTTGTAAGAGAGCTTGGACTGTGGAGGCTTGCT  
GGCCACTTTTTGGGGTCAGCTCCTCTGAAATGCATTAGCGGAACCGTTTGCAATCTGCCA  
CAAGTGTGATAAGTTATCTACACTGGCGAGGGGATTGCTCTCTGTAATGTTTCACTTCTA  
ATTGTCTCTACTTTGTGAGACAACCTTTGAATGCTTGACCTCAAATCAGGTAGGACTACC  
CGCTGAACTTAA

>ABC6-42

TTTCCGTAGGTGAACCTGCGGAAGGATCATTATTGAATTATGTTTCTAGATAGGTTGTAG  
CTGGCTC-TTLAGAGCATGTGCACGCCTGTTTGGACTTCATTTTCATCCACCTGTGCACC  
TATTGTAGTCTTTGGTTGGGTTAGGGGGAAGTGGTCATTGTGTCAGCATCTGCTGGATGT  
GAGGACTTGCATTGTGAAAGCTTTGCTGTCCTTGATGTGATCATGGAATCTCTTTCTCAC  
TAGAGTCTATGTCACCTATTATACTCTGTGCAATGTCATTGAATGTCTTTACATGGGCTT  
GTATGCCTATGAAAATTGTAATACAACCTTTCAGCAACGGATCTCTTGGCTCTCGCATCGA  
TGAAGGACGCAGCGAAATGCGATAAGTAATGTGAATTGCAGAATTCAGTGAATCATCGAA  
TCTTTGAACGCATCTTGCGCTCCTTGGTATTCCGAGGAGCATGCCTGTTTGAGTGTCAAT  
AAATTCTCAACTCTCTTATAC-TTTTTTGTAAGAGAGCTTGGACTGTGGAGGCTTGCT  
GGCCACTTTTTGGGGTCAGCTCCTCTGAAATGCATTAGCGGAACCGTTTGCAATCTGCCA  
CAAGTGTGATAAGTTATCTACACTGGCGAGGGGATTGCTCTCTGTAATGTTTCACTTCTA



ATTGTCTCTACTTTGTGAGACAACTTTTGAATGCTTGACCTCAAATCAGGTAGGACTACC  
CGCTGAACTTAA

>ABC9-20

TTTCCGTAGGTGAACCTGCGGAAGGATCATTATTGAATTATGTTTCTAGATAGGTTGTAG  
CTGGCTC-TTTAGAGCATGTGCACGCCTGTTTGGACTTCATTTTCATCCACCTGTGCACC  
TATTGTAGTCTTTGGTTGGGTTAGGGGGAAGTGGTCATTGTGTCAGCATCTGCTGGATGT  
GAGGACTTGCATTGTGAAAGCTTTGCTGTCCTTGATGTGATCATGGAATCTCTTTCTCAC  
TAGAGTCTATGTCACTCATTATACTCTGTGCAATGTCATTGAATGTCTTTACATGGGCTT  
GTATGCCTATGAAAATTGTAATAACAACCTTTCAGCAACGGATCTCTTGGCTCTCGCATCGA  
TGAAGGACGCAGCGAAATGCGATAAGTAATGTGAATTGCAGAATTCAGTGAATCATCGAA  
TCTTTGAACGCATCTTGCCTCCTTGGTATTCCGAGGAGCATGCCTGTTTGAGTGTCAAT  
AAATTCTCAACTCTCTTATAC-TTTTTGTAAAAGAGAGCTTGGACTGTGGAGGCTTGCT  
GGCCACTTTTTGGGGTCAGCTCCTCTGAAATGCATTAGCGGAACCGTTTGCAATCTGCCA  
CAAGTGTGATAAGTTATCTACACTGGCGAGGGGATTGCTCTCTGTAATGTTTCAGCTTCTA  
ATTGTCTCTACTTTGTGAGACAACTTTTGAATGCTTGACCTCAAATCAGGTAGGACTACC  
CGCTGAACTTAA

>ABC8-29

TTTCCGTAGGTGAACCTGCGGAAGGATCATTATTGAATTATGTTTCTAGATAGGTTGTAG  
CTGGCTC-TTTAGAGCATGTGCACGCCTGTTTGGACTTCATTTTCATCCACCTGTGCACC  
TATTGTAGTCTTTGGTTGGGTTAGGGGGAAGTGGTCATTGTGTCAGCATCTGCTGGATGT  
GAGGACTTGCATTGTGAAAGCTTTGCTGTCCTTGATGTGATCATGGAATCTCTTTCTCAC  
TAGAGTCTATGTCACTCATTATACTCTGTGCAATGTCATTGAATGTCTTTACATGGGCTT  
GTATGCCTATGAAAATTGTAATAACAACCTTTCAGCAACGGATCTCTTGGCTCTCGCATCGA  
TGAAGGACGCAGCGAAATGCGATAAGTAATGTGAATTGCAGAATTCAGTGAATCATCGAA  
TCTTTGAACGCATCTTGCCTCCTTGGTATTCCGAGGAGCATGCCTGTTTGAGTGTCAAT  
AAATTCTCAACTCTCTTATAC-TTTTTGTAAAAGAGAGCTTGGACTGTGGAGGCTTGCT  
GGCCACTTTTTGGGGTCAGCTCCTCTGAAATGCATTAGCGGAACCGTTTGCAATCTGCCA  
CAAGTGTGATAAGTTATCTACACTGGCGAGGGGATTGCTCTCTGTAATGTTTCAGCTTCTA  
ATTGTCTCTACTTTGTGAGACAACTTTTGAATGCTTGACCTCAAATCAGGTAGGACTACC  
CGCTGAACTTAA

>ABC2-1

TTTCCGTAGGTGAACCTGCGGAAGGATCATTATTGAATTATGTTTCTAGATAGGTTGTAG  
CTGGCTC-TTTAGAGCATGTGCACGCCTGTTTGGACTTCATTTTCATCCACCTGTGCACC  
TATTGTAGTCTTTGGTTGGGTTAGGGGGAAGTGGTCATTGTGTCAGCATCTGCTGGATGT  
GAGGACTTGCATTGTGAAAGCTTTGCTGTCCTTGATGTGATCATGGAATCTCTTTCTCAC  
TAGAGTCTATGTCACTCATTATACTCTGTGCAATGTCATTGAATGTCTTTACATGGGCTT  
GTATGCCTATGAAAATTGTAATAACAACCTTTCAGCAACGGATCTCTTGGCTCTCGCATCGA  
TGAAGGACGCAGCGAAATGCGATAAGTAATGTGAATTGCAGAATTCAGTGAATCATCGAA  
TCTTTGAACGCATCTTGCCTCCTTGGTATTCCGAGGAGCATGCCTGTTTGAGTGTCAAT  
AAATTCTCAACTCTCTTATAC-TTTTTGTAAAAGAGAGCTTGGACTGTGGAGGCTTGCT  
GGCCACTTTTTGGGGTCAGCTCCTCTGAAATGCATTAGCGGAACCGTTTGCAATCTGCCA  
CAAGTGTGATAAGTTATCTACACTGGCGAGGGGATTGCTCTCTGTAATGTTTCAGCTTCTA  
ATTGTCTCTACTTTGTGAGACAACTTTTGAATGCTTGACCTCAAATCAGGTAGGACTACC  
CGCTGAACTTAA

>ABC6-13

TTTCCGTAGGTGAACCTGCGGAAGGATCATTATTGAATTATGTTTCTAGATAGGTTGTAG  
CTGGCTC-TTTAGAGCATGTGCACGCCTGTTTGGACTTCATTTTCATCCACCTGTGCACC  
TATTGTAGTCTTTGGTTGGGTTAGGGGGAAGTGGTCATTGTGTCAGCATCTGCTGGATGT  
GAGGACTTGCATTGTGAAAGCTTTGCTGTCCTTGATGTGATCATGGAATCTCTTTCTCAC  
TAGAGTCTATGTCACTCATTATACTCTGTGCAATGTCATTGAATGTCTTTACATGGGCTT



GTATGCCTATGAAAATTGTAATACAACCTTTTCAGCAACGGATCTCTTGGCTCTCGCATCGA  
TGAAGGACGCAGCGAAATGCGATAAGTAATGTGAATTGCAGAATTCAGTGAATCATCGAA  
TCTTTGAACGCATCTTGCCTCCTTGGTATTCCGAGGAGCATGCCTGTTTGAGTGTCAAT  
AAATTCTCAACTCTCTTATAC-TTTTTTGAAAAGAGAGCTTGGACTGTGGAGGCTTGCT  
GGCCACTTTTTGGGGTCAGCTCCTCTGAAATGCATTAGCGGAACCGTTTGCAATCTGCCA  
CAAGTGTGATAAGTTATCTACACTGGCGAGGGGATTGCTCTCTGTAATGTTTCAGCTTCTA  
ATTGTCTCTACTTTGTGAGACAACCTTTGAATGCTTGACCTCAAATCAGGTAGGACTACC  
CGCTGAACTTAA

>ABC4-25

TTTCCGTAGGTGAACCTGCGGAAGGATCATTATTGAATTATGTTTCTAGATAGGTTGTAG  
CTGGCTC-TTLAGAGCATGTGCACGCCTGTTTGGACTTCATTTTCATCCACCTGTGCACC  
TATTGTAGTCTTTGGTTGGGTTAGGGGGAAGTGGTCATTGTGTCAGCATCTGCTGGATGT  
GAGGACTTGCATTGTGAAAGCTTTGCTGTCCTTGATGTGATCATGGAATCTCTTTCTCAC  
TAGAGTCTATGTCACTCATTATACTCTGTCTGAATGTCATTGAATGTCTTTACATGGGCTT  
GTATGCCTATGAAAATTGTAATACAACCTTTTCAGCAACGGATCTCTTGGCTCTCGCATCGA  
TGAAGGACGCAGCGAAATGCGATAAGTAATGTGAATTGCAGAATTCAGTGAATCATCGAA  
TCTTTGAACGCATCTTGCCTCCTTGGTATTCCGAGGAGCATGCCTGTTTGAGTGTCAAT  
AAATTCTCAACTCTCTTATAC-TTTTTTGAAAAGAGAGCTTGGACTGTGGAGGCTTGCT  
GGCCACTTTTTGGGGTCAGCTCCTCTGAAATGCATTAGCGGAACCGTTTGCAATCTGCCA  
CAAGTGTGATAAGTTATCTACACTGGCGAGGGGATTGCTCTCTGTAATGTTTCAGCTTCTA  
ATTGTCTCTACTTTGTGAGACAACCTTTGAATGCTTGACCTCAAATCAGGTAGGACTACC  
CGCTGAACTTAA

>ABC7-28

TTTCCGTAGGTGAACCTGCGGAAGGATCATTATTGAATTATGTTTCTAGATAGGTTGTAG  
CTGGCTC-TTLAGAGCATGTGCACGCCTGTTTGGACTTCATTTTCATCCACCTGTGCACC  
TATTGTAGTCTTTGGTTGGGTTAGGGGGAAGTGGTCATTGTGTCAGCATCTGCTGGATGT  
GAGGACTTGCATTGTGAAAGCTTTGCTGTCCTTGATGTGATCATGGAATCTCTTTCTCAC  
TAGAGTCTATGTCACTCATTATACTCTGTCTGAATGTCATTGAATGTCTTTACATGGGCTT  
GTATGCCTATGAAAATTGTAATACAACCTTTTCAGCAACGGATCTCTTGGCTCTCGCATCGA  
TGAAGGACGCAGCGAAATGCGATAAGTAATGTGAATTGCAGAATTCAGTGAATCATCGAA  
TCTTTGAACGCATCTTGCCTCCTTGGTATTCCGAGGAGCATGCCTGTTTGAGTGTCAAT  
AAATTCTCAACTCTCTTATAC-TTTTTTGAAAAGAGAGCTTGGACTGTGGAGGCTTGCT  
GGCCACTTTTTGGGGTCAGCTCCTCTGAAATGCATTAGCGGAACCGTTTGCAATCTGCCA  
CAAGTGTGATAAGTTATCTACACTGGCGAGGGGATTGCTCTCTGTAATGTTTCAGCTTCTA  
ATTGTCTCTACTTTGTGAGACAACCTTTGAATGCTTGACCTCAAATCAGGTAGGACTACC  
CGCTGAACTTAA

>ABC9-21

TTTCCGTAGGTGAACCTGCGGAAGGATCATTATTGAATTATGTTTCTAGATAGGTTGTAG  
CTGGCTC-TTLAGAGCATGTGCACGCCTGTTTGGACTTCATTTTCATCCACCTGTGCACC  
TATTGTAGTCTTTGGTTGGGTTAGGGGGAAGTGGTCATTGTGTCAGCATCTGCTGGATGT  
GAGGACTTGCATTGTGAAAGCTTTGCTGTCCTTGATGTGATCATGGAATCTCTTTCTCAC  
TAGAGTCTATGTCACTCATTATACTCTGTCTGAATGTCATTGAATGTCTTTACATGGGCTT  
GTATGCCTATGAAAATTGTAATACAACCTTTTCAGCAACGGATCTCTTGGCTCTCGCATCGA  
TGAAGGACGCAGCGAAATGCGATAAGTAATGTGAATTGCAGAATTCAGTGAATCATCGAA  
TCTTTGAACGCATCTTGCCTCCTTGGTATTCCGAGGAGCATGCCTGTTTGAGTGTCAAT  
AAATTCTCAACTCTCTTATAC-TTTTTTGAAAAGAGAGCTTGGACTGTGGAGGCTTGCT  
GGCCACTTTTTGGGGTCAGCTCCTCTGAAATGCATTAGCGGAACCGTTTGCAATCTGCCA  
CAAGTGTGATAAGTTATCTACACTGGCGAGGGGATTGCTCTCTGTAATGTTTCAGCTTCTA  
ATTGTCTCTACTTTGTGAGACAACCTTTGAATGCTTGACCTCAAATCAGGTAGGACTACC  
CGCTGAACTTAA



>ABC10-14

TTTCCGTAGGTGAACCTGCGGAAGGATCATTATTGAATTATGTTTCTAGATAGGTTGTAG  
CTGGCTC-TTTAGAGCATGTGCACGCCTGTTTGGACTTCATTTTCATCCACCTGTGCACC  
TATTGTAGTCTTTGGTTGGGTTAGGGGGAAGTGGTCATTGTGTCAGCATCTGCTGGATGT  
GAGGACTTGCATTGTGAAAGCTTTGCTGTCCTTGATGTGATCATGGAATCTCTTTCTCAC  
TAGAGTCTATGTCACCTCATTATACTCTGTGCGAATGTCATTGAATGTCTTTACATGGGCTT  
GTATGCCTATGAAAATTGTAATACAACCTTTCAGCAACGGATCTCTTGGCTCTCGCATCGA  
TGAAGGACGCAGCGAAATGCGATAAGTAATGTGAATTGCAGAATTCAGTGAATCATCGAA  
TCTTTGAACGCATCTTGCCTCCTTGGTATTCCGAGGAGCATGCCTGTTTGAGTGTGATT  
AAATTCTCAACTCTCTTATAC-TTTTTGTAAAAGAGAGCTTGGACTGTGGAGGCTTGCT  
GGCCACTTTTTGGGGTCAGCTCCTCTGAAATGCATTAGCGGAACCGTTTGCAATCTGCCA  
CAAGTGTGATAAGTTATCTACACTGGCGAGGGGATTGCTCTCTGTAATGTTTCAGCTTCTA  
ATTGTCTCTACTTTGTGAGACAACTTTTGAATGCTTGACCTCAAATCAGGTAGGACTACC  
CGCTGAACTTAA

>ABC10-30

TTTCCGTAGGTGAACCTGCGGAAGGATCATTATTGAATTATGTTTCTAGATAGGTTGTAG  
CTGGCTC-TTTAGAGCATGTGCACGCCTGTTTGGACTTCATTTTCATCCACCTGTGCACC  
TATTGTAGTCTTTGGTTGGGTTAGGGGGAAGTGGTCATTGTGTCAGCATCTGCTGGATGT  
GAGGACTTGCATTGTGAAAGCTTTGCTGTCCTTGATGTGATCATGGAATCTCTTTCTCAC  
TAGAGTCTATGTCACCTCATTATACTCTGTGCGAATGTCATTGAATGTCTTTACATGGGCTT  
GTATGCCTATGAAAATTGTAATACAACCTTTCAGCAACGGATCTCTTGGCTCTCGCATCGA  
TGAAGGACGCAGCGAAATGCGATAAGTAATGTGAATTGCAGAATTCAGTGAATCATCGAA  
TCTTTGAACGCATCTTGCCTCCTTGGTATTCCGAGGAGCATGCCTGTTTGAGTGTGATT  
AAATTCTCAACTCTCTTATAC-TTTTTGTAAAAGAGAGCTTGGACTGTGGAGGCTTGCT  
GGCCACTTTTTGGGGTCAGCTCCTCTGAAATGCATTAGCGGAACCGTTTGCAATCTGCCA  
CAAGTGTGATAAGTTATCTACACTGGCGAGGGGATTGCTCTCTGTAATGTTTCAGCTTCTA  
ATTGTCTCTACTTTGTGAGACAACTTTTGAATGCTTGACCTCAAATCAGGTAGGACTACC  
CGCTGAACTTAA

>ABC11-32

TTTCCGTAGGTGAACCTGCGGAAGGATCATTATTGAATTATGTTTCTAGATAGGTTGTAG  
CTGGCTC-TTTAGAGCATGTGCACGCCTGTTTGGACTTCATTTTCATCCACCTGTGCACC  
TATTGTAGTCTTTGGTTGGGTTAGGGGGAAGTGGTCATTGTGTCAGCATCTGCTGGATGT  
GAGGACTTGCATTGTGAAAGCTTTGCTGTCCTTGATGTGATCATGGAATCTCTTTCTCAC  
TAGAGTCTATGTCACCTCATTATACTCTGTGCGAATGTCATTGAATGTCTTTACATGGGCTT  
GTATGCCTATGAAAATTGTAATACAACCTTTCAGCAACGGATCTCTTGGCTCTCGCATCGA  
TGAAGGACGCAGCGAAATGCGATAAGTAATGTGAATTGCAGAATTCAGTGAATCATCGAA  
TCTTTGAACGCATCTTGCCTCCTTGGTATTCCGAGGAGCATGCCTGTTTGAGTGTGATT  
AAATTCTCAACTCTCTTATAC-TTTTTGTAAAAGAGAGCTTGGACTGTGGAGGCTTGCT  
GGCCACTTTTTGGGGTCAGCTCCTCTGAAATGCATTAGCGGAACCGTTTGCAATCTGCCA  
CAAGTGTGATAAGTTATCTACACTGGCGAGGGGATTGCTCTCTGTAATGTTTCAGCTTCTA  
ATTGTCTCTACTTTGTGAGACAACTTTTGAATGCTTGACCTCAAATCAGGTAGGACTACC  
CGCTGAACTTAA

>ABC10-13

TTTCCGTAGGTGAACCTGCGGAAGGATCATTATTGAATTATGTTTCTAGATAGGTTGTAG  
CTGGCTC-TTTAGAGCATGTGCACGCCTGTTTGGACTTCATTTTCATCCACCTGTGCACC  
TATTGTAGTCTTTGGTTGGGTTAGGGGGAAGTGGTCATTGTGTCAGCATCTGCTGGATGT  
GAGGACTTGCATTGTGAAAGCTTTGCTGTCCTTGATGTGATCATGGAATCTCTTTCTCAC  
TAGAGTCTATGTCACCTCATTATACTCTGTGCGAATGTCATTGAATGTCTTTACATGGGCTT  
GTATGCCTATGAAAATTGTAATACAACCTTTCAGCAACGGATCTCTTGGCTCTCGCATCGA  
TGAAGGACGCAGCGAAATGCGATAAGTAATGTGAATTGCAGAATTCAGTGAATCATCGAA



TCTTTGAACGCATCTTGCGCTCCTTGGTATTCCGAGGAGCATGCCTGTTTGAGTGTCAATT  
AAATTCTCAACTCTCTTATAC-TTTTTGTAAAAGAGAGCTTGGACTGTGGAGGCTTGCT  
GGCCACTTTTTGGGGTCAGCTCCTCTGAAATGCATTAGCGGAACCGTTTGCAATCTGCCA  
CAAGTGTGATAAGTTATCTACACTGGCGAGGGGATTGCTCTCTGTAATGTTTCAGCTTCTA  
ATTGTCTCTACTTTGTGAGACAACTTTGAATGCTTGACCTCAAATCAGGTAGGACTACC  
CGCTGAACTTAA

>ABC6-31

TTTCCGTAGGTGAACCTGCGGAAGGATCATTATTGAATTATGTTTCTAGATAGGTTGTAG  
CTGGCTC-TTTAGAGCATGTGCACGCCTGTTTGGACTTCATTTTCATCCACCTGTGCACC  
TATTGTAGTCTTTGGTTGGGTTAGGGGGAAGTGGTCATTGTGTCAGCATCTGCTGGATGT  
GAGGACTTGCAATTGTGAAAGCTTTGCTGTCTTGATGTGATCATGGAATCTCTTTCTCAC  
TAGAGTCTATGTCACTCATTATACTCTGTGCAATGTCATTGAATGTCTTTACATGGGCTT  
GTATGCCTATGAAAATTGTAATACAACCTTTGAGCAACGGATCTCTTGGCTCTCGCATCGA  
TGAAGGACGCAGCGAAATGCGATAAGTAATGTGAATTGCAGAATTCAGTGAATCATCGAA  
TCTTTGAACGCATCTTGCGCTCCTTGGTATTCCGAGGAGCATGCCTGTTTGAGTGTCAATT  
AAATTCTCAACTCTCTTATAC-TTTTTGTAAAAGAGAGCTTGGACTGTGGAGGCTTGCT  
GGCCACTTTTTGGGGTCAGCTCCTCTGAAATGCATTAGCGGAACCGTTTGCAATCTGCCA  
CAAGTGTGATAAGTTATCTACACTGGCGAGGGGATTGCTCTCTGTAATGTTTCAGCTTCTA  
ATTGTCTCTACTTTGTGAGACAACTTTGAATGCTTGACCTCAAATCAGGTAGGACTACC  
CGCTGAACTTAA

>ABC3-7

TTTCCGTAGGTGAACCTGCGGAAGGATCATTATTGAATTATGTTTCTAGATAGGTTGTAG  
CTGGCTC-TTTAGAGCATGTGCACGCCTGTTTGGACTTCATTTTCATCCACCTGTGCACC  
TATTGTAGTCTTTGGTTGGGTTAGGGGGAAGTGGTCATTGTGTCAGCATCTGCTGGATGT  
GAGGACTTGCAATTGTGAAAGCTTTGCTGTCTTGATGTGATCATGGAATCTCTTTCTCAC  
TAGAGTCTATGTCACTCATTATACTCTGTGCAATGTCATTGAATGTCTTTACATGGGCTT  
GTATGCCTATGAAAATTGTAATACAACCTTTGAGCAACGGATCTCTTGGCTCTCGCATCGA  
TGAAGGACGCAGCGAAATGCGATAAGTAATGTGAATTGCAGAATTCAGTGAATCATCGAA  
TCTTTGAACGCATCTTGCGCTCCTTGGTATTCCGAGGAGCATGCCTGTTTGAGTGTCAATT  
AAATTCTCAACTCTCTTATAC-TTTTTGTAAAAGAGAGCTTGGACTGTGGAGGCTTGCT  
GGCCACTTTTTGGGGTCAGCTCCTCTGAAATGCATTAGCGGAACCGTTTGCAATCTGCCA  
CAAGTGTGATAAGTTATCTACACTGGCGAGGGGATTGCTCTCTGTAATGTTTCAGCTTCTA  
ATTGTCTCTACTTTGTGAGACAACTTTGAATGCTTGACCTCAAATCAGGTAGGACTACC  
CGCTGAACTTAA

>ABC3-23

TTTCCGTAGGTGAACCTGCGGAAGGATCATTATTGAATTATGTTTCTAGATAGGTTGTAG  
CTGGCTC-TTTAGAGCATGTGCACGCCTGTTTGGACTTCATTTTCATCCACCTGTGCACC  
TATTGTAGTCTTTGGTTGGGTTAGGGGGAAGTGGTCATTGTGTCAGCATCTGCTGGATGT  
GAGGACTTGCAATTGTGAAAGCTTTGCTGTCTTGATGTGATCATGGAATCTCTTTCTCAC  
TAGAGTCTATGTCACTCATTATACTCTGTGCAATGTCATTGAATGTCTTTACATGGGCTT  
GTATGCCTATGAAAATTGTAATACAACCTTTGAGCAACGGATCTCTTGGCTCTCGCATCGA  
TGAAGGACGCAGCGAAATGCGATAAGTAATGTGAATTGCAGAATTCAGTGAATCATCGAA  
TCTTTGAACGCATCTTGCGCTCCTTGGTATTCCGAGGAGCATGCCTGTTTGAGTGTCAATT  
AAATTCTCAACTCTCTTATAC-TTTTTGTAAAAGAGAGCTTGGACTGTGGAGGCTTGCT  
GGCCACTTTTTGGGGTCAGCTCCTCTGAAATGCATTAGCGGAACCGTTTGCAATCTGCCA  
CAAGTGTGATAAGTTATCTACACTGGCGAGGGGATTGCTCTCTGTAATGTTTCAGCTTCTA  
ATTGTCTCTACTTTGTGAGACAACTTTGAATGCTTGACCTCAAATCAGGTAGGACTACC  
CGCTGAACTTAA

>ABC4-1

TTTCCGTAGGTGAACCTGCGGAAGGATCATTATTGAATTATGTTTCTAGATAGGTTGTAG



CTGGCTC-TTTAGAGCATGTGCACGCCTGTTTGGACTTCATTTTCATCCACCTGTGCACC  
TATTGTAGTCTTTGGTTGGGTTAGGGGGAAGTGGTCATTGTGTCAGCATCTGCTGGATGT  
GAGGACTTGCATTGTGAAAGCTTTGCTGTCCTTGATGTGATCATGGAATCTCTTTCTCAC  
TAGAGTCTATGTCACCTATTATACTCTGTGCAATGTCATTGAATGTCTTTACATGGGCTT  
GTATGCCTATGAAAATTGTAATACAACCTTTCAGCAACGGATCTCTTGGCTCTCGCATCGA  
TGAAGGACGCAGCGAAATGCGATAAGTAATGTGAATTGCAGAATTCAGTGAATCATCGAA  
TCTTTGAACGCATCTTGCCTCCTTGGTATTCCGAGGAGCATGCCTGTTTGAGTGTCAAT  
AAATTCTCAACTCTCTTATAC-TTTTTTGTAAGAGAGCTTGGACTGTGGAGGCTTGCT  
GGCCACTTTTTGGGGTCAGCTCCTCTGAAATGCATTAGCGGAACCGTTTGCAATCTGCCA  
CAAGTGTGATAAGTTATCTACACTGGCGAGGGGATTGCTCTCTGTAATGTTGAGCTTCTA  
ATTGTCTCTACTTTGTGAGACAACCTTTGAATGCTTGACCTCAAATCAGGTAGGACTACC  
CGCTGAACTTAA

>ABC4-35

TTTCCGTAGGTGAACCTGCGGAAGGATCATTATTGAATTATGTTTCTAGATAGGTTGTAG  
CTGGCTC-TTTAGAGCATGTGCACGCCTGTTTGGACTTCATTTTCATCCACCTGTGCACC  
TATTGTAGTCTTTGGTTGGGTTAGGGGGAAGTGGTCATTGTGTCAGCATCTGCTGGATGT  
GAGGACTTGCATTGTGAAAGCTTTGCTGTCCTTGATGTGATCATGGAATCTCTTTCTCAC  
TAGAGTCTATGTCACCTATTATACTCTGTGCAATGTCATTGAATGTCTTTACATGGGCTT  
GTATGCCTATGAAAATTGTAATACAACCTTTCAGCAACGGATCTCTTGGCTCTCGCATCGA  
TGAAGGACGCAGCGAAATGCGATAAGTAATGTGAATTGCAGAATTCAGTGAATCATCGAA  
TCTTTGAACGCATCTTGCCTCCTTGGTATTCCGAGGAGCATGCCTGTTTGAGTGTCAAT  
AAATTCTCAACTCTCTTATAC-TTTTTTGTAAGAGAGCTTGGACTGTGGAGGCTTGCT  
GGCCACTTTTTGGGGTCAGCTCCTCTGAAATGCATTAGCGGAACCGTTTGCAATCTGCCA  
CAAGTGTGATAAGTTATCTACACTGGCGAGGGGATTGCTCTCTGTAATGTTGAGCTTCTA  
ATTGTCTCTACTTTGTGAGACAACCTTTGAATGCTTGACCTCAAATCAGGTAGGACTACC  
CGCTGAACTTAA

>ABC5-51

TTTCCGTAGGTGAACCTGCGGAAGGATCATTATTGAATTATGTTTCTAGATAGGTTGTAG  
CTGGCTC-TTTAGAGCATGTGCACGCCTGTTTGGACTTCATTTTCATCCACCTGTGCACC  
TATTGTAGTCTTTGGTTGGGTTAGGGGGAAGTGGTCATTGTGTCAGCATCTGCTGGATGT  
GAGGACTTGCATTGTGAAAGCTTTGCTGTCCTTGATGTGATCATGGAATCTCTTTCTCAC  
TAGAGTCTATGTCACCTATTATACTCTGTGCAATGTCATTGAATGTCTTTACATGGGCTT  
GTATGCCTATGAAAATTGTAATACAACCTTTCAGCAACGGATCTCTTGGCTCTCGCATCGA  
TGAAGGACGCAGCGAAATGCGATAAGTAATGTGAATTGCAGAATTCAGTGAATCATCGAA  
TCTTTGAACGCATCTTGCCTCCTTGGTATTCCGAGGAGCATGCCTGTTTGAGTGTCAAT  
AAATTCTCAACTCTCTTATAC-TTTTTTGTAAGAGAGCTTGGACTGTGGAGGCTTGCT  
GGCCACTTTTTGGGGTCAGCTCCTCTGAAATGCATTAGCGGAACCGTTTGCAATCTGCCA  
CAAGTGTGATAAGTTATCTACACTGGCGAGGGGATTGCTCTCTGTAATGTTGAGCTTCTA  
ATTGTCTCTACTTTGTGAGACAACCTTTGAATGCTTGACCTCAAATCAGGTAGGACTACC  
CGCTGAACTTAA

>ABC5-66

TTTCCGTAGGTGAACCTGCGGAAGGATCATTATTGAATTATGTTTCTAGATAGGTTGTAG  
CTGGCTC-TTTAGAGCATGTGCACGCCTGTTTGGACTTCATTTTCATCCACCTGTGCACC  
TATTGTAGTCTTTGGTTGGGTTAGGGGGAAGTGGTCATTGTGTCAGCATCTGCTGGATGT  
GAGGACTTGCATTGTGAAAGCTTTGCTGTCCTTGATGTGATCATGGAATCTCTTTCTCAC  
TAGAGTCTATGTCACCTATTATACTCTGTGCAATGTCATTGAATGTCTTTACATGGGCTT  
GTATGCCTATGAAAATTGTAATACAACCTTTCAGCAACGGATCTCTTGGCTCTCGCATCGA  
TGAAGGACGCAGCGAAATGCGATAAGTAATGTGAATTGCAGAATTCAGTGAATCATCGAA  
TCTTTGAACGCATCTTGCCTCCTTGGTATTCCGAGGAGCATGCCTGTTTGAGTGTCAAT  
AAATTCTCAACTCTCTTATAC-TTTTTTGTAAGAGAGCTTGGACTGTGGAGGCTTGCT



GGCCACTTTTTGGGGTCAGCTCCTCTGAAATGCATTAGCGGAACCGTTTGCAATCTGCCA  
CAAGTGTGATAAGTTATCTACACTGGCGAGGGGATTGCTCTCTGTAATGTTGAGCTTCTA  
ATTGTCTCTACTTTGTGAGACAACTTTGAATGCTTGACCTCAAATCAGGTAGGACTACC  
CGCTGAACTTAA

>ABC7-15

TTTCCGTAGGTGAACCTGCGGAAGGATCATTATTGAATTATGTTTCTAGATAGGTTGTAG  
CTGGCTC-TTTAGAGCATGTGCACGCCTGTTTGGACTTCATTTTCATCCACCTGTGCACC  
TATTGTAGTCTTTGGTTGGGTTAGGGGGAAGTGGTCATTGTGTCAGCATCTGCTGGATGT  
GAGGACTTGCATTGTGAAAGCTTTGCTGTCCTTGATGTGATCATGGAATCTCTTTCTCAC  
TAGAGTCTATGTCACTCATTATACTCTGTGCAATGTCATTGAATGTCTTTACATGGGCTT  
GTATGCCTATGAAAATTGTAATAACAACCTTTCAGCAACGGATCTCTTGGCTCTCGCATCGA  
TGAAGGACGCAGCGAAATGCGATAAGTAATGTGAATTGCAGAATTCAGTGAATCATCGAA  
TCTTTGAACGCATCTTGCGCTCCTTGGTATTCCGAGGAGCATGCCTGTTTGAGTGTGATT  
AAATTCTCAACTCTCTTATAC-TTTTTGTAAAAGAGAGCTTGGACTGTGGAGGCTTGCT  
GGCCACTTTTTGGGGTCAGCTCCTCTGAAATGCATTAGCGGAACCGTTTGCAATCTGCCA  
CAAGTGTGATAAGTTATCTACACTGGCGAGGGGATTGCTCTCTGTAATGTTGAGCTTCTA  
ATTGTCTCTACTTTGTGAGACAACTTTGAATGCTTGACCTCAAATCAGGTAGGACTACC  
CGCTGAACTTAA

>ABC7-31

TTTCCGTAGGTGAACCTGCGGAAGGATCATTATTGAATTATGTTTCTAGATAGGTTGTAG  
CTGGCTC-TTTAGAGCATGTGCACGCCTGTTTGGACTTCATTTTCATCCACCTGTGCACC  
TATTGTAGTCTTTGGTTGGGTTAGGGGGAAGTGGTCATTGTGTCAGCATCTGCTGGATGT  
GAGGACTTGCATTGTGAAAGCTTTGCTGTCCTTGATGTGATCATGGAATCTCTTTCTCAC  
TAGAGTCTATGTCACTCATTATACTCTGTGCAATGTCATTGAATGTCTTTACATGGGCTT  
GTATGCCTATGAAAATTGTAATAACAACCTTTCAGCAACGGATCTCTTGGCTCTCGCATCGA  
TGAAGGACGCAGCGAAATGCGATAAGTAATGTGAATTGCAGAATTCAGTGAATCATCGAA  
TCTTTGAACGCATCTTGCGCTCCTTGGTATTCCGAGGAGCATGCCTGTTTGAGTGTGATT  
AAATTCTCAACTCTCTTATAC-TTTTTGTAAAAGAGAGCTTGGACTGTGGAGGCTTGCT  
GGCCACTTTTTGGGGTCAGCTCCTCTGAAATGCATTAGCGGAACCGTTTGCAATCTGCCA  
CAAGTGTGATAAGTTATCTACACTGGCGAGGGGATTGCTCTCTGTAATGTTGAGCTTCTA  
ATTGTCTCTACTTTGTGAGACAACTTTGAATGCTTGACCTCAAATCAGGTAGGACTACC  
CGCTGAACTTAA

>ABC7-53

TTTCCGTAGGTGAACCTGCGGAAGGATCATTATTGAATTATGTTTCTAGATAGGTTGTAG  
CTGGCTC-TTTAGAGCATGTGCACGCCTGTTTGGACTTCATTTTCATCCACCTGTGCACC  
TATTGTAGTCTTTGGTTGGGTTAGGGGGAAGTGGTCATTGTGTCAGCATCTGCTGGATGT  
GAGGACTTGCATTGTGAAAGCTTTGCTGTCCTTGATGTGATCATGGAATCTCTTTCTCAC  
TAGAGTCTATGTCACTCATTATACTCTGTGCAATGTCATTGAATGTCTTTACATGGGCTT  
GTATGCCTATGAAAATTGTAATAACAACCTTTCAGCAACGGATCTCTTGGCTCTCGCATCGA  
TGAAGGACGCAGCGAAATGCGATAAGTAATGTGAATTGCAGAATTCAGTGAATCATCGAA  
TCTTTGAACGCATCTTGCGCTCCTTGGTATTCCGAGGAGCATGCCTGTTTGAGTGTGATT  
AAATTCTCAACTCTCTTATAC-TTTTTGTAAAAGAGAGCTTGGACTGTGGAGGCTTGCT  
GGCCACTTTTTGGGGTCAGCTCCTCTGAAATGCATTAGCGGAACCGTTTGCAATCTGCCA  
CAAGTGTGATAAGTTATCTACACTGGCGAGGGGATTGCTCTCTGTAATGTTGAGCTTCTA  
ATTGTCTCTACTTTGTGAGACAACTTTGAATGCTTGACCTCAAATCAGGTAGGACTACC  
CGCTGAACTTAA

>ABC8-3

TTTCCGTAGGTGAACCTGCGGAAGGATCATTATTGAATTATGTTTCTAGATAGGTTGTAG  
CTGGCTC-TTTAGAGCATGTGCACGCCTGTTTGGACTTCATTTTCATCCACCTGTGCACC  
TATTGTAGTCTTTGGTTGGGTTAGGGGGAAGTGGTCATTGTGTCAGCATCTGCTGGATGT



GAGGACTTGCATTGTGAAAGCTTTGCTGTCCTTGATGTGATCATGGAATCTCTTTCTCAC  
TAGAGTCTATGTCACCTATTATACTCTGTGCAATGTCATTGAATGTCTTTACATGGGCTT  
GTATGCCTATGAAAATTGTAATACAACCTTTCAGCAACGGATCTCTTGGCTCTCGCATCGA  
TGAAGGACGCAGCGAAATGCGATAAGTAATGTGAATTGCAGAATTCAGTGAATCATCGAA  
TCTTTGAACGCATCTTGCGCTCCTTGGTATTCCGAGGAGCATGCCTGTTTGAGTGTCAAT  
AAATTCTCAACTCTCTTATAC-TTTTTTGTAAGAGAGCTTGGACTGTGGAGGCTTGCT  
GGCCACTTTTTGGGGTCAGCTCCTCTGAAATGCATTAGCGGAACCGTTTGCAATCTGCCA  
CAAGTGTGATAAGTTATCTACACTGGCGAGGGGATTGCTCTCTGTAATGTTTCAGCTTCTA  
ATTGTCTCTACTTTGTGAGACAACCTTTGAATGCTTGACCTCAAATCAGGTAGGACTACC  
CGCTGAACTTAA

>ABC8-28

TTTCCGTAGGTGAACCTGCGGAAGGATCATTATTGAATTATGTTTCTAGATAGGTTGTAG  
CTGGCTC-TTLAGAGCATGTGCACGCCTGTTTGGACTTCATTTTCATCCACCTGTGCACC  
TATTGTAGTCTTTGGTTGGGTTAGGGGGAAGTGGTCATTGTGTCAGCATCTGCTGGATGT  
GAGGACTTGCATTGTGAAAGCTTTGCTGTCCTTGATGTGATCATGGAATCTCTTTCTCAC  
TAGAGTCTATGTCACCTATTATACTCTGTGCAATGTCATTGAATGTCTTTACATGGGCTT  
GTATGCCTATGAAAATTGTAATACAACCTTTCAGCAACGGATCTCTTGGCTCTCGCATCGA  
TGAAGGACGCAGCGAAATGCGATAAGTAATGTGAATTGCAGAATTCAGTGAATCATCGAA  
TCTTTGAACGCATCTTGCGCTCCTTGGTATTCCGAGGAGCATGCCTGTTTGAGTGTCAAT  
AAATTCTCAACTCTCTTATAC-TTTTTTGTAAGAGAGCTTGGACTGTGGAGGCTTGCT  
GGCCACTTTTTGGGGTCAGCTCCTCTGAAATGCATTAGCGGAACCGTTTGCAATCTGCCA  
CAAGTGTGATAAGTTATCTACACTGGCGAGGGGATTGCTCTCTGTAATGTTTCAGCTTCTA  
ATTGTCTCTACTTTGTGAGACAACCTTTGAATGCTTGACCTCAAATCAGGTAGGACTACC  
CGCTGAACTTAA

>ABC9-25

TTTCCGTAGGTGAACCTGCGGAAGGATCATTATTGAATTATGTTTCTAGATAGGTTGTAG  
CTGGCTC-TTLAGAGCATGTGCACGCCTGTTTGGACTTCATTTTCATCCACCTGTGCACC  
TATTGTAGTCTTTGGTTGGGTTAGGGGGAAGTGGTCATTGTGTCAGCATCTGCTGGATGT  
GAGGACTTGCATTGTGAAAGCTTTGCTGTCCTTGATGTGATCATGGAATCTCTTTCTCAC  
TAGAGTCTATGTCACCTATTATACTCTGTGCAATGTCATTGAATGTCTTTACATGGGCTT  
GTATGCCTATGAAAATTGTAATACAACCTTTCAGCAACGGATCTCTTGGCTCTCGCATCGA  
TGAAGGACGCAGCGAAATGCGATAAGTAATGTGAATTGCAGAATTCAGTGAATCATCGAA  
TCTTTGAACGCATCTTGCGCTCCTTGGTATTCCGAGGAGCATGCCTGTTTGAGTGTCAAT  
AAATTCTCAACTCTCTTATAC-TTTTTTGTAAGAGAGCTTGGACTGTGGAGGCTTGCT  
GGCCACTTTTTGGGGTCAGCTCCTCTGAAATGCATTAGCGGAACCGTTTGCAATCTGCCA  
CAAGTGTGATAAGTTATCTACACTGGCGAGGGGATTGCTCTCTGTAATGTTTCAGCTTCTA  
ATTGTCTCTACTTTGTGAGACAACCTTTGAATGCTTGACCTCAAATCAGGTAGGACTACC  
CGCTGAACTTAA

>ABC9-42

TTTCCGTAGGTGAACCTGCGGAAGGATCATTATTGAATTATGTTTCTAGATAGGTTGTAG  
CTGGCTC-TTLAGAGCATGTGCACGCCTGTTTGGACTTCATTTTCATCCACCTGTGCACC  
TATTGTAGTCTTTGGTTGGGTTAGGGGGAAGTGGTCATTGTGTCAGCATCTGCTGGATGT  
GAGGACTTGCATTGTGAAAGCTTTGCTGTCCTTGATGTGATCATGGAATCTCTTTCTCAC  
TAGAGTCTATGTCACCTATTATACTCTGTGCAATGTCATTGAATGTCTTTACATGGGCTT  
GTATGCCTATGAAAATTGTAATACAACCTTTCAGCAACGGATCTCTTGGCTCTCGCATCGA  
TGAAGGACGCAGCGAAATGCGATAAGTAATGTGAATTGCAGAATTCAGTGAATCATCGAA  
TCTTTGAACGCATCTTGCGCTCCTTGGTATTCCGAGGAGCATGCCTGTTTGAGTGTCAAT  
AAATTCTCAACTCTCTTATAC-TTTTTTGTAAGAGAGCTTGGACTGTGGAGGCTTGCT  
GGCCACTTTTTGGGGTCAGCTCCTCTGAAATGCATTAGCGGAACCGTTTGCAATCTGCCA  
CAAGTGTGATAAGTTATCTACACTGGCGAGGGGATTGCTCTCTGTAATGTTTCAGCTTCTA



ATTGTCTCTACTTTGTGAGACAACTTTTGAATGCTTGACCTCAAATCAGGTAGGACTACC  
CGCTGAACTTAA

>ABC9-54

TTTCCGTAGGTGAACCTGCGGAAGGATCATTATTGAATTATGTTTCTAGATAGGTTGTAG  
CTGGCTC-TTTAGAGCATGTGCACGCCTGTTTGGACTTCATTTTCATCCACCTGTGCACC  
TATTGTAGTCTTTGGTTGGGTTAGGGGGAAGTGGTCATTGTGTCAGCATCTGCTGGATGT  
GAGGACTTGCATTGTGAAAGCTTTGCTGTCCTTGATGTGATCATGGAATCTCTTTCTCAC  
TAGAGTCTATGTCACTCATTATACTCTGTGCAATGTCATTGAATGTCTTTACATGGGCTT  
GTATGCCTATGAAAATTGTAATAACAACCTTTCAGCAACGGATCTCTTGGCTCTCGCATCGA  
TGAAGGACGCAGCGAAATGCGATAAGTAATGTGAATTGCAGAATTCAGTGAATCATCGAA  
TCTTTGAACGCATCTTGCCTCCTTGGTATTCCGAGGAGCATGCCTGTTTGAGTGTCAAT  
AAATTCTCAACTCTCTTATAC-TTTTTGTAAAAGAGAGCTTGGACTGTGGAGGCTTGCT  
GGCCACTTTTTGGGGTCAGCTCCTCTGAAATGCATTAGCGGAACCGTTTGCAATCTGCCA  
CAAGTGTGATAAGTTATCTACACTGGCGAGGGGATTGCTCTCTGTAATGTTTCAGCTTCTA  
ATTGTCTCTACTTTGTGAGACAACTTTTGAATGCTTGACCTCAAATCAGGTAGGACTACC  
CGCTGAACTTAA

>ABC9-59

TTTCCGTAGGTGAACCTGCGGAAGGATCATTATTGAATTATGTTTCTAGATAGGTTGTAG  
CTGGCTC-TTTAGAGCATGTGCACGCCTGTTTGGACTTCATTTTCATCCACCTGTGCACC  
TATTGTAGTCTTTGGTTGGGTTAGGGGGAAGTGGTCATTGTGTCAGCATCTGCTGGATGT  
GAGGACTTGCATTGTGAAAGCTTTGCTGTCCTTGATGTGATCATGGAATCTCTTTCTCAC  
TAGAGTCTATGTCACTCATTATACTCTGTGCAATGTCATTGAATGTCTTTACATGGGCTT  
GTATGCCTATGAAAATTGTAATAACAACCTTTCAGCAACGGATCTCTTGGCTCTCGCATCGA  
TGAAGGACGCAGCGAAATGCGATAAGTAATGTGAATTGCAGAATTCAGTGAATCATCGAA  
TCTTTGAACGCATCTTGCCTCCTTGGTATTCCGAGGAGCATGCCTGTTTGAGTGTCAAT  
AAATTCTCAACTCTCTTATAC-TTTTTGTAAAAGAGAGCTTGGACTGTGGAGGCTTGCT  
GGCCACTTTTTGGGGTCAGCTCCTCTGAAATGCATTAGCGGAACCGTTTGCAATCTGCCA  
CAAGTGTGATAAGTTATCTACACTGGCGAGGGGATTGCTCTCTGTAATGTTTCAGCTTCTA  
ATTGTCTCTACTTTGTGAGACAACTTTTGAATGCTTGACCTCAAATCAGGTAGGACTACC  
CGCTGAACTTAA

>ABC11-45

TTTCCGTAGGTGAACCTGCGGAAGGATCATTATTGAATTATGTTTCTAGATAGGTTGTAG  
CTGGCTC-TTTAGAGCATGTGCACGCCTGTTTGGACTTCATTTTCATCCACCTGTGCACC  
TATTGTAGTCTTTGGTTGGGTTAGGGGGAAGTGGTCATTGTGTCAGCATCTGCTGGATGT  
GAGGACTTGCATTGTGAAAGCTTTGCTGTCCTTGATGTGATCATGGAATCTCTTTCTCAC  
TAGAGTCTATGTCACTCATTATACTCTGTGCAATGTCATTGAATGTCTTTACATGGGCTT  
GTATGCCTATGAAAATTGTAATAACAACCTTTCAGCAACGGATCTCTTGGCTCTCGCATCGA  
TGAAGGACGCAGCGAAATGCGATAAGTAATGTGAATTGCAGAATTCAGTGAATCATCGAA  
TCTTTGAACGCATCTTGCCTCCTTGGTATTCCGAGGAGCATGCCTGTTTGAGTGTCAAT  
AAATTCTCAACTCTCTTATAC-TTTTTGTAAAAGAGAGCTTGGACTGTGGAGGCTTGCT  
GGCCACTTTTTGGGGTCAGCTCCTCTGAAATGCATTAGCGGAACCGTTTGCAATCTGCCA  
CAAGTGTGATAAGTTATCTACACTGGCGAGGGGATTGCTCTCTGTAATGTTTCAGCTTCTA  
ATTGTCTCTACTTTGTGAGACAACTTTTGAATGCTTGACCTCAAATCAGGTAGGACTACC  
CGCTGAACTTAA

>ABC3-13

TTTCCGTAGGTGAACCTGCGGAAGGATCATTATTGAATTATGTTTCTAGATAGGTTGTAG  
CTGGCTC-TTTAGAGCATGTGCACGCCTGTTTGGACTTCATTTTCATCCACCTGTGCACC  
TATTGTAGTCTTTGGTTGGGTTAGGGGGAAGTGGTCATTGTGTCAGCATCTGCTGGATGT  
GAGGACTTGCATTGTGAAAGCTTTGCTGTCCTTGATGTGATCATGGAATCTCTTTCTCAC  
TAGAGTCTATGTCACTCATTATACTCTGTGCAATGTCATTGAATGTCTTTACATGGGCTT



GTATGCCTATGAAAATTGTAATACAACCTTTTCAGCAACGGATCTCTTGGCTCTCGCATCGA  
TGAAGGACGCAGCGAAATGCGATAAGTAATGTGAATTGCAGAATTCAGTGAATCATCGAA  
TCTTTGAACGCATCTTGCCTCCTTGGTATTCCGAGGAGCATGCCTGTTTGAGTGTCAAT  
AAATTCTCAACTCTCTTATAC-TTTTTTGAAAAGAGAGCTTGGACTGTGGAGGCTTGCT  
GGCCACTTTTTGGGGTCAGCTCCTCTGAAATGCATTAGCGGAACCGTTTGCAATCTGCCA  
CAAGTGTGATAAGTTATCTACACTGGCGAGGGGATTGCTCTCTGTAATGTTTCAGCTTCTA  
ATTGTCTCTACTTTGTGAGACAACCTTTGAATGCTTGACCTCAAATCAGGTAGGACTACC  
CGCTGAACTTAA

>ABC8-11

TTTCCGTAGGTGAACCTGCGGAAGGATCATTATTGAATTATGTTTCTAGATAGGTTGTAG  
CTGGCTC-TTLAGAGCATGTGCACGCCTGTTTGGACTTCATTTTCATCCACCTGTGCACC  
TATTGTAGTCTTTGGTTGGGTTAGGGGGAAGTGGTCATTGTGTCAGCATCTGCTGGATGT  
GAGGACTTGCATTGTGAAAGCTTTGCTGTCCTTGATGTGATCATGGAATCTCTTTCTCAC  
TAGAGTCTATGTCACCTCATTATACTCTGTGCAATGTCATTGAATGTCTTTACATGGGCTT  
GTATGCCTATGAAAATTGTAATACAACCTTTTCAGCAACGGATCTCTTGGCTCTCGCATCGA  
TGAAGGACGCAGCGAAATGCGATAAGTAATGTGAATTGCAGAATTCAGTGAATCATCGAA  
TCTTTGAACGCATCTTGCCTCCTTGGTATTCCGAGGAGCATGCCTGTTTGAGTGTCAAT  
AAATTCTCAACTCTCTTATAC-TTTTTTGAAAAGAGAGCTTGGACTGTGGAGGCTTGCT  
GGCCACTTTTTGGGGTCAGCTCCTCTGAAATGCATTAGCGGAACCGTTTGCAATCTGCCA  
CAAGTGTGATAAGTTATCTACACTGGCGAGGGGATTGCTCTCTGTAATGTTTCAGCTTCTA  
ATTGTCTCTACTTTGTGAGACAACCTTTGAATGCTTGACCTCAAATCAGGTAGGACTACC  
CGCTGAACTTAA

>ABC10-39

TTTCCGTAGGTGAACCTGCGGAAGGATCATTATTGAATTATGTTTCTAGATAGGTTGTAG  
CTGGCTC-TTLAGAGCATGTGCACGCCTGTTTGGACTTCATTTTCATCCACCTGTGCACC  
TATTGTAGTCTTTGGTTGGGTTAGGGGGAAGTGGTCATTGTGTCAGCATCTGCTGGATGT  
GAGGACTTGCATTGTGAAAGCTTTGCTGTCCTTGATGTGATCATGGAATCTCTTTCTCAC  
TAGAGTCTATGTCACCTCATTATACTCTGTGCAATGTCATTGAATGTCTTTACATGGGCTT  
GTATGCCTATGAAAATTGTAATACAACCTTTTCAGCAACGGATCTCTTGGCTCTCGCATCGA  
TGAAGGACGCAGCGAAATGCGATAAGTAATGTGAATTGCAGAATTCAGTGAATCATCGAA  
TCTTTGAACGCATCTTGCCTCCTTGGTATTCCGAGGAGCATGCCTGTTTGAGTGTCAAT  
AAATTCTCAACTCTCTTATAC-TTTTTTGAAAAGAGAGCTTGGACTGTGGAGGCTTGCT  
GGCCACTTTTTGGGGTCAGCTCCTCTGAAATGCATTAGCGGAACCGTTTGCAATCTGCCA  
CAAGTGTGATAAGTTATCTACACTGGCGAGGGGATTGCTCTCTGTAATGTTTCAGCTTCTA  
ATTGTCTCTACTTTGTGAGACAACCTTTGAATGCTTGACCTCAAATCAGGTAGGACTACC  
CGCTGAACTTAA

>ABC11-34

TTTCCGTAGGTGAACCTGCGGAAGGATCATTATTGAATTATGTTTCTAGATAGGTTGTAG  
CTGGCTC-TTLAGAGCATGTGCACGCCTGTTTGGACTTCATTTTCATCCACCTGTGCACC  
TATTGTAGTCTTTGGTTGGGTTAGGGGGAAGTGGTCATTGTGTCAGCATCTGCTGGATGT  
GAGGACTTGCATTGTGAAAGCTTTGCTGTCCTTGATGTGATCATGGAATCTCTTTCTCAC  
TAGAGTCTATGTCACCTCATTATACTCTGTGCAATGTCATTGAATGTCTTTACATGGGCTT  
GTATGCCTATGAAAATTGTAATACAACCTTTTCAGCAACGGATCTCTTGGCTCTCGCATCGA  
TGAAGGACGCAGCGAAATGCGATAAGTAATGTGAATTGCAGAATTCAGTGAATCATCGAA  
TCTTTGAACGCATCTTGCCTCCTTGGTATTCCGAGGAGCATGCCTGTTTGAGTGTCAAT  
AAATTCTCAACTCTCTTATAC-TTTTTTGAAAAGAGAGCTTGGACTGTGGAGGCTTGCT  
GGCCACTTTTTGGGGTCAGCTCCTCTGAAATGCATTAGCGGAACCGTTTGCAATCTGCCA  
CAAGTGTGATAAGTTATCTACACTGGCGAGGGGATTGCTCTCTGTAATGTTTCAGCTTCTA  
ATTGTCTCTACTTTGTGAGACAACCTTTGAATGCTTGACCTCAAATCAGGTAGGACTACC  
CGCTGAACTTAA



>ABC8-40

TTTCCGTAGGTGAACCTGCGGAAGGATCATTATTGAATTATGTTTCTAGATAGGTTGTAG  
CTGGCTC-TTTAGAGCATGTGCACGCCTGTTTGGACTTCATTTTCATCCACCTGTGCACC  
TATTGTAGTCTTTGGTTGGGTTAGGGGGAAGTGGTCATTGTGTCAGCATCTGCTGGATGT  
GAGGACTTGCATTGTGAAAGCTTTGCTGTCCTTGATGTGATCATGGAATCTCTTTCTCAC  
TAGAGTCTATGTCACCTCATTATACTCTGTGCGAATGTCATTGAATGTCTTTACATGGGCTT  
GTATGCCTATGAAAATTGTAATACAACCTTTCAGCAACGGATCTCTTGGCTCTCGCATCGA  
TGAAGGACGCAGCGAAATGCGATAAGTAATGTGAATTGCAGAATTCAGTGAATCATCGAA  
TCTTTGAACGCATCTTGCGCTCCTTGGTATTCCGAGGAGCATGCCTGTTTGAGTGTCAAT  
AAATTCTCAACTCTCTTATAC-TTTTTGTAAAAGAGAGCTTGGACTGTGGAGGCTTGCT  
GGCCACTTTTTGGGGTCAGCTCCTCTGAAATGCATTAGCGGAACCGTTTGCAATCTGCCA  
CAAGTGTGATAAGTTATCTACACTGGCGAGGGGATTGCTCTCTGTAATGTTTCAGCTTCTA  
ATTGTCTCTACTTTGTGAGACAACTTTTGAATGCTTGACCTCAAATCAGGTAGGACTACC  
CGCTGAACTTAA

>ABC10-23

TTTCCGTAGGTGAACCTGCGGAAGGATCATTATTGAATTATGTTTCTAGATAGGTTGTAG  
CTGGCTC-TTTAGAGCATGTGCACGCCTGTTTGGACTTCATTTTCATCCACCTGTGCACC  
TATTGTAGTCTTTGGTTGGGTTAGGGGGAAGTGGTCATTGTGTCAGCATCTGCTGGATGT  
GAGGACTTGCATTGTGAAAGCTTTGCTGTCCTTGATGTGATCATGGAATCTCTTTCTCAC  
TAGAGTCTATGTCACCTCATTATACTCTGTGCGAATGTCATTGAATGTCTTTACATGGGCTT  
GTATGCCTATGAAAATTGTAATACAACCTTTCAGCAACGGATCTCTTGGCTCTCGCATCGA  
TGAAGGACGCAGCGAAATGCGATAAGTAATGTGAATTGCAGAATTCAGTGAATCATCGAA  
TCTTTGAACGCATCTTGCGCTCCTTGGTATTCCGAGGAGCATGCCTGTTTGAGTGTCAAT  
AAATTCTCAACTCTCTTATAC-TTTTTGTAAAAGAGAGCTTGGACTGTGGAGGCTTGCT  
GGCCACTTTTTGGGGTCAGCTCCTCTGAAATGCATTAGCGGAACCGTTTGCAATCTGCCA  
CAAGTGTGATAAGTTATCTACACTGGCGAGGGGATTGCTCTCTGTAATGTTTCAGCTTCTA  
ATTGTCTCTACTTTGTGAGACAACTTTTGAATGCTTGACCTCAAATCAGGTAGGACTACC  
CGCTGAACTTAA

>ABC1-9

TTTCCGTAGGTGAACCTGCGGAAGGATCATTATTGAATTATGTTTCTAGATAGGTTGTAG  
CTGGCTC-TTTAGAGCATGTGCACGCCTGTTTGGACTTCATTTTCATCCACCTGTGCACC  
TATTGTAGTCTTTGGTTGGGTTAGGGGGAAGTGGTCATTGTGTCAGCATCTGCTGGATGT  
GAGGACTTGCATTGTGAAAGCTTTGCTGTCCTTGATGTGATCATGGAATCTCTTTCTCAC  
TAGAGTCTATGTCACCTCATTATACTCTGTGCGAATGTCATTGAATGTCTTTACATGGGCTT  
GTATGCCTATGAAAATTGTAATACAACCTTTCAGCAACGGATCTCTTGGCTCTCGCATCGA  
TGAAGGACGCAGCGAAATGCGATAAGTAATGTGAATTGCAGAATTCAGTGAATCATCGAA  
TCTTTGAACGCATCTTGCGCTCCTTGGTATTCCGAGGAGCATGCCTGTTTGAGTGTCAAT  
AAATTCTCAACTCTCTTATAC-TTTTTGTAAAAGAGAGCTTGGACTGTGGAGGCTTGCT  
GGCCACTTTTTGGGGTCAGCTCCTCTGAAATGCATTAGCGGAACCGTTTGCAATCTGCCA  
CAAGTGTGATAAGTTATCTACACTGGCGAGGGGATTGCTCTCTGTAATGTTTCAGCTTCTA  
ATTGTCTCTACTTTGTGAGACAACTTTTGAATGCTTGACCTCAAATCAGGTAGGACTACC  
CGCTGAACTTAA

>ABC1-28

TTTCCGTAGGTGAACCTGCGGAAGGATCATTATTGAATTATGTTTCTAGATAGGTTGTAG  
CTGGCTC-TTTAGAGCATGTGCACGCCTGTTTGGACTTCATTTTCATCCACCTGTGCACC  
TATTGTAGTCTTTGGTTGGGTTAGGGGGAAGTGGTCATTGTGTCAGCATCTGCTGGATGT  
GAGGACTTGCATTGTGAAAGCTTTGCTGTCCTTGATGTGATCATGGAATCTCTTTCTCAC  
TAGAGTCTATGTCACCTCATTATACTCTGTGCGAATGTCATTGAATGTCTTTACATGGGCTT  
GTATGCCTATGAAAATTGTAATACAACCTTTCAGCAACGGATCTCTTGGCTCTCGCATCGA  
TGAAGGACGCAGCGAAATGCGATAAGTAATGTGAATTGCAGAATTCAGTGAATCATCGAA



TCTTTGAACGCATCTTGCGCTCCTTGGTATTCCGAGGAGCATGCCTGTTTGAGTGTCAATT  
AAATTCTCAACTCTCTTATAC-TTTTTGTAAAAGAGAGCTTGGACTGTGGAGGCTTGCT  
GGCCACTTTTTGGGGTCAGCTCCTCTGAAATGCATTAGCGGAACCGTTTGCAATCTGCCA  
CAAGTGTGATAAGTTATCTACACTGGCGAGGGGATTGCTCTCTGTAATGTTGAGCTTCTA  
ATTGTCTCTACTTTGTGAGACAACTTTGAATGCTTGACCTCAAATCAGGTAGGACTACC  
CGCTGAACTTAA

>ABC1-12

TTTCCGTAGGTGAACCTGCGGAAGGATCATTATTGAATTATGTTTCTAGATAGGTTGTAG  
CTGGCTC-TTTAGAGCATGTGCACGCCTGTTTGGACTTCATTTTCATCCACCTGTGCACC  
TATTGTAGTCTTTGGTTGGGTAGGGGGAAGTGGTCATTGTGTCAGCATCTGCTGGATGT  
GAGGACTTGCAATTGTGAAAGCTTTGCTGTCCTTGATGTGATCATGGAATCTCTTTCTCAC  
TAGAGTCTATGTCACTCATTATACTCTGTGCAATGTCATTGAATGTCTTTACATGGGCTT  
GTATGCCTATGAAAATTGTAATACAACCTTTCAGCAACGGATCTCTTGGCTCTCGCATCGA  
TGAAGGACGCAGCGAAATGCGATAAGTAATGTGAATTGCAGAATTCAGTGAATCATCGAA  
TCTTTGAACGCATCTTGCGCTCCTTGGTATTCCGAGGAGCATGCCTGTTTGAGTGTCAATT  
AAATTCTCAACTCTCTTATAC-TTTTTGTAAAAGAGAGCTTGGACTGTGGAGGCTTGCT  
GGCCACTTTTTGGGGTCAGCTCCTCTGAAATGCATTAGCGGAACCGTTTGCAATCTGCCA  
CAAGTGTGATAAGTTATCTACACTGGCGAGGGGATTGCTCTCTGTAATGTTGAGCTTCTA  
ATTGTCTCTACTTTGTGAGACAACTTTGAATGCTTGACCTCAAATCAGGTAGGACTACC  
CGCTGAACTTAA

>ABC1-19

TTTCCGTAGGTGAACCTGCGGAAGGATCATTATTGAATTATGTTTCTAGATAGGTTGTAG  
CTGGCTC-TTTAGAGCATGTGCACGCCTGTTTGGACTTCATTTTCATCCACCTGTGCACC  
TATTGTAGTCTTTGGTTGGGTAGGGGGAAGTGGTCATTGTGTCAGCATCTGCTGGATGT  
GAGGACTTGCAATTGTGAAAGCTTTGCTGTCCTTGATGTGATCATGGAATCTCTTTCTCAC  
TAGAGTCTATGTCACTCATTATACTCTGTGCAATGTCATTGAATGTCTTTACATGGGCTT  
GTATGCCTATGAAAATTGTAATACAACCTTTCAGCAACGGATCTCTTGGCTCTCGCATCGA  
TGAAGGACGCAGCGAAATGCGATAAGTAATGTGAATTGCAGAATTCAGTGAATCATCGAA  
TCTTTGAACGCATCTTGCGCTCCTTGGTATTCCGAGGAGCATGCCTGTTTGAGTGTCAATT  
AAATTCTCAACTCTCTTATAC-TTTTTGTAAAAGAGAGCTTGGACTGTGGAGGCTTGCT  
GGCCACTTTTTGGGGTCAGCTCCTCTGAAATGCATTAGCGGAACCGTTTGCAATCTGCCA  
CAAGTGTGATAAGTTATCTACACTGGCGAGGGGATTGCTCTCTGTAATGTTGAGCTTCTA  
ATTGTCTCTACTTTGTGAGACAACTTTGAATGCTTGACCTCAAATCAGGTAGGACTACC  
CGCTGAACTTAA

>ABC1-32

TTTCCGTAGGTGAACCTGCGGAAGGATCATTATTGAATTATGTTTCTAGATAGGTTGTAG  
CTGGCTC-TTTAGAGCATGTGCACGCCTGTTTGGACTTCATTTTCATCCACCTGTGCACC  
TATTGTAGTCTTTGGTTGGGTAGGGGGAAGTGGTCATTGTGTCAGCATCTGCTGGATGT  
GAGGACTTGCAATTGTGAAAGCTTTGCTGTCCTTGATGTGATCATGGAATCTCTTTCTCAC  
TAGAGTCTATGTCACTCATTATACTCTGTGCAATGTCATTGAATGTCTTTACATGGGCTT  
GTATGCCTATGAAAATTGTAATACAACCTTTCAGCAACGGATCTCTTGGCTCTCGCATCGA  
TGAAGGACGCAGCGAAATGCGATAAGTAATGTGAATTGCAGAATTCAGTGAATCATCGAA  
TCTTTGAACGCATCTTGCGCTCCTTGGTATTCCGAGGAGCATGCCTGTTTGAGTGTCAATT  
AAATTCTCAACTCTCTTATAC-TTTTTGTAAAAGAGAGCTTGGACTGTGGAGGCTTGCT  
GGCCACTTTTTGGGGTCAGCTCCTCTGAAATGCATTAGCGGAACCGTTTGCAATCTGCCA  
CAAGTGTGATAAGTTATCTACACTGGCGAGGGGATTGCTCTCTGTAATGTTGAGCTTCTA  
ATTGTCTCTACTTTGTGAGACAACTTTGAATGCTTGACCTCAAATCAGGTAGGACTACC  
CGCTGAACTTAA

>ABC1-11

TTTCCGTAGGTGAACCTGCGGAAGGATCATTATTGAATTATGTTTCTAGATAGGTTGTAG



CTGGCTC-TTTAGAGCATGTGCACGCCTGTTTGGACTTCATTTTCATCCACCTGTGCACC  
TATTGTAGTCTTTGGTTGGGTTAGGGGGAAGTGGTCATTGTGTCAGCATCTGCTGGATGT  
GAGGACTTGCATTGTGAAAGCTTTGCTGTCCTTGATGTGATCATGGAATCTCTTTCTCAC  
TAGAGTCTATGTCACCTATTATACTCTGTGCAATGTCATTGAATGTCTTTACATGGGCTT  
GTATGCCTATGAAAATTGTAATACAACCTTTCAGCAACGGATCTCTTGGCTCTCGCATCGA  
TGAAGGACGCAGCGAAATGCGATAAGTAATGTGAATTGCAGAATTCAGTGAATCATCGAA  
TCTTTGAACGCATCTTGCCTCCTTGGTATTCCGAGGAGCATGCCTGTTTGAGTGTCAAT  
AAATTCTCAACTCTCTTATAC-TTTTTTGTAAGAGAGCTTGGACTGTGGAGGCTTGCT  
GGCCACTTTTTGGGGTCAGCTCCTCTGAAATGCATTAGCGGAACCGTTTGCAATCTGCCA  
CAAGTGTGATAAGTTATCTACACTGGCGAGGGGATTGCTCTCTGTAATGTTGAGCTTCTA  
ATTGTCTCTACTTTGTGAGACAACCTTTGAATGCTTGACCTCAAATCAGGTAGGACTACC  
CGCTGAACTTAA

>ABC1-14

TTTCCGTAGGTGAACCTGCGGAAGGATCATTATTGAATTATGTTTCTAGATAGGTTGTAG  
CTGGCTC-TTTAGAGCATGTGCACGCCTGTTTGGACTTCATTTTCATCCACCTGTGCACC  
TATTGTAGTCTTTGGTTGGGTTAGGGGGAAGTGGTCATTGTGTCAGCATCTGCTGGATGT  
GAGGACTTGCATTGTGAAAGCTTTGCTGTCCTTGATGTGATCATGGAATCTCTTTCTCAC  
TAGAGTCTATGTCACCTATTATACTCTGTGCAATGTCATTGAATGTCTTTACATGGGCTT  
GTATGCCTATGAAAATTGTAATACAACCTTTCAGCAACGGATCTCTTGGCTCTCGCATCGA  
TGAAGGACGCAGCGAAATGCGATAAGTAATGTGAATTGCAGAATTCAGTGAATCATCGAA  
TCTTTGAACGCATCTTGCCTCCTTGGTATTCCGAGGAGCATGCCTGTTTGAGTGTCAAT  
AAATTCTCAACTCTCTTATAC-TTTTTTGTAAGAGAGCTTGGACTGTGGAGGCTTGCT  
GGCCACTTTTTGGGGTCAGCTCCTCTGAAATGCATTAGCGGAACCGTTTGCAATCTGCCA  
CAAGTGTGATAAGTTATCTACACTGGCGAGGGGATTGCTCTCTGTAATGTTGAGCTTCTA  
ATTGTCTCTACTTTGTGAGACAACCTTTGAATGCTTGACCTCAAATCAGGTAGGACTACC  
CGCTGAACTTAA

>ABC1-18

TTTCCGTAGGTGAACCTGCGGAAGGATCATTATTGAATTATGTTTCTAGATAGGTTGTAG  
CTGGCTC-TTTAGAGCATGTGCACGCCTGTTTGGACTTCATTTTCATCCACCTGTGCACC  
TATTGTAGTCTTTGGTTGGGTTAGGGGGAAGTGGTCATTGTGTCAGCATCTGCTGGATGT  
GAGGACTTGCATTGTGAAAGCTTTGCTGTCCTTGATGTGATCATGGAATCTCTTTCTCAC  
TAGAGTCTATGTCACCTATTATACTCTGTGCAATGTCATTGAATGTCTTTACATGGGCTT  
GTATGCCTATGAAAATTGTAATACAACCTTTCAGCAACGGATCTCTTGGCTCTCGCATCGA  
TGAAGGACGCAGCGAAATGCGATAAGTAATGTGAATTGCAGAATTCAGTGAATCATCGAA  
TCTTTGAACGCATCTTGCCTCCTTGGTATTCCGAGGAGCATGCCTGTTTGAGTGTCAAT  
AAATTCTCAACTCTCTTATAC-TTTTTTGTAAGAGAGCTTGGACTGTGGAGGCTTGCT  
GGCCACTTTTTGGGGTCAGCTCCTCTGAAATGCATTAGCGGAACCGTTTGCAATCTGCCA  
CAAGTGTGATAAGTTATCTACACTGGCGAGGGGATTGCTCTCTGTAATGTTGAGCTTCTA  
ATTGTCTCTACTTTGTGAGACAACCTTTGAATGCTTGACCTCAAATCAGGTAGGACTACC  
CGCTGAACTTAA

>ABC1-20

TTTCCGTAGGTGAACCTGCGGAAGGATCATTATTGAATTATGTTTCTAGATAGGTTGTAG  
CTGGCTC-TTTAGAGCATGTGCACGCCTGTTTGGACTTCATTTTCATCCACCTGTGCACC  
TATTGTAGTCTTTGGTTGGGTTAGGGGGAAGTGGTCATTGTGTCAGCATCTGCTGGATGT  
GAGGACTTGCATTGTGAAAGCTTTGCTGTCCTTGATGTGATCATGGAATCTCTTTCTCAC  
TAGAGTCTATGTCACCTATTATACTCTGTGCAATGTCATTGAATGTCTTTACATGGGCTT  
GTATGCCTATGAAAATTGTAATACAACCTTTCAGCAACGGATCTCTTGGCTCTCGCATCGA  
TGAAGGACGCAGCGAAATGCGATAAGTAATGTGAATTGCAGAATTCAGTGAATCATCGAA  
TCTTTGAACGCATCTTGCCTCCTTGGTATTCCGAGGAGCATGCCTGTTTGAGTGTCAAT  
AAATTCTCAACTCTCTTATAC-TTTTTTGTAAGAGAGCTTGGACTGTGGAGGCTTGCT



GGCCACTTTTTGGGGTCAGCTCCTCTGAAATGCATTAGCGGAACCGTTTGCAATCTGCCA  
CAAGTGTGATAAGTTATCTACACTGGCGAGGGGATTGCTCTCTGTAATGTTGAGCTTCTA  
ATTGTCTCTACTTTGTGAGACAACTTTGAATGCTTGACCTCAAATCAGGTAGGACTACC  
CGCTGAACTTAA

>ABC1-21

TTTCCGTAGGTGAACCTGCGGAAGGATCATTATTGAATTATGTTTCTAGATAGGTTGTAG  
CTGGCTC-TTTAGAGCATGTGCACGCCTGTTTGGACTTCATTTTCATCCACCTGTGCACC  
TATTGTAGTCTTTGGTTGGGTTAGGGGGAAGTGGTCATTGTGTCAGCATCTGCTGGATGT  
GAGGACTTGCATTGTGAAAGCTTTGCTGTCCTTGATGTGATCATGGAATCTCTTTCTCAC  
TAGAGTCTATGTCACTCATTATACTCTGTGCAATGTCATTGAATGTCTTTACATGGGCTT  
GTATGCCTATGAAAATTGTAATACTTTTTCAGCAACGGATCTCTTGGCTCTCGCATCGA  
TGAAGGACGCAGCGAAATGCGATAAGTAATGTGAATTGCAGAATTCAGTGAATCATCGAA  
TCTTTGAACGCATCTTGCGCTCCTTGGTATTCCGAGGAGCATGCCTGTTTGAGTGTGATT  
AAATTCTCAACTCTCTTATAC-TTTTTGTAAAAGAGAGCTTGGACTGTGGAGGCTTGCT  
GGCCACTTTTTGGGGTCAGCTCCTCTGAAATGCATTAGCGGAACCGTTTGCAATCTGCCA  
CAAGTGTGATAAGTTATCTACACTGGCGAGGGGATTGCTCTCTGTAATGTTGAGCTTCTA  
ATTGTCTCTACTTTGTGAGACAACTTTGAATGCTTGACCTCAAATCAGGTAGGACTACC  
CGCTGAACTTAA

>ABC1-26

TTTCCGTAGGTGAACCTGCGGAAGGATCATTATTGAATTATGTTTCTAGATAGGTTGTAG  
CTGGCTC-TTTAGAGCATGTGCACGCCTGTTTGGACTTCATTTTCATCCACCTGTGCACC  
TATTGTAGTCTTTGGTTGGGTTAGGGGGAAGTGGTCATTGTGTCAGCATCTGCTGGATGT  
GAGGACTTGCATTGTGAAAGCTTTGCTGTCCTTGATGTGATCATGGAATCTCTTTCTCAC  
TAGAGTCTATGTCACTCATTATACTCTGTGCAATGTCATTGAATGTCTTTACATGGGCTT  
GTATGCCTATGAAAATTGTAATACTTTTTCAGCAACGGATCTCTTGGCTCTCGCATCGA  
TGAAGGACGCAGCGAAATGCGATAAGTAATGTGAATTGCAGAATTCAGTGAATCATCGAA  
TCTTTGAACGCATCTTGCGCTCCTTGGTATTCCGAGGAGCATGCCTGTTTGAGTGTGATT  
AAATTCTCAACTCTCTTATAC-TTTTTGTAAAAGAGAGCTTGGACTGTGGAGGCTTGCT  
GGCCACTTTTTGGGGTCAGCTCCTCTGAAATGCATTAGCGGAACCGTTTGCAATCTGCCA  
CAAGTGTGATAAGTTATCTACACTGGCGAGGGGATTGCTCTCTGTAATGTTGAGCTTCTA  
ATTGTCTCTACTTTGTGAGACAACTTTGAATGCTTGACCTCAAATCAGGTAGGACTACC  
CGCTGAACTTAA

>ABC1-34

TTTCCGTAGGTGAACCTGCGGAAGGATCATTATTGAATTATGTTTCTAGATAGGTTGTAG  
CTGGCTC-TTTAGAGCATGTGCACGCCTGTTTGGACTTCATTTTCATCCACCTGTGCACC  
TATTGTAGTCTTTGGTTGGGTTAGGGGGAAGTGGTCATTGTGTCAGCATCTGCTGGATGT  
GAGGACTTGCATTGTGAAAGCTTTGCTGTCCTTGATGTGATCATGGAATCTCTTTCTCAC  
TAGAGTCTATGTCACTCATTATACTCTGTGCAATGTCATTGAATGTCTTTACATGGGCTT  
GTATGCCTATGAAAATTGTAATACTTTTTCAGCAACGGATCTCTTGGCTCTCGCATCGA  
TGAAGGACGCAGCGAAATGCGATAAGTAATGTGAATTGCAGAATTCAGTGAATCATCGAA  
TCTTTGAACGCATCTTGCGCTCCTTGGTATTCCGAGGAGCATGCCTGTTTGAGTGTGATT  
AAATTCTCAACTCTCTTATAC-TTTTTGTAAAAGAGAGCTTGGACTGTGGAGGCTTGCT  
GGCCACTTTTTGGGGTCAGCTCCTCTGAAATGCATTAGCGGAACCGTTTGCAATCTGCCA  
CAAGTGTGATAAGTTATCTACACTGGCGAGGGGATTGCTCTCTGTAATGTTGAGCTTCTA  
ATTGTCTCTACTTTGTGAGACAACTTTGAATGCTTGACCTCAAATCAGGTAGGACTACC  
CGCTGAACTTAA

>ABC1-37

TTTCCGTAGGTGAACCTGCGGAAGGATCATTATTGAATTATGTTTCTAGATAGGTTGTAG  
CTGGCTC-TTTAGAGCATGTGCACGCCTGTTTGGACTTCATTTTCATCCACCTGTGCACC  
TATTGTAGTCTTTGGTTGGGTTAGGGGGAAGTGGTCATTGTGTCAGCATCTGCTGGATGT



GAGGACTTGCATTGTGAAAGCTTTGCTGTCCTTGATGTGATCATGGAATCTCTTTCTCAC  
TAGAGTCTATGTCACCTATTATACTCTGTGCAATGTCATTGAATGTCTTTACATGGGCTT  
GTATGCCTATGAAAATTGTAATACAACCTTTCAGCAACGGATCTCTTGGCTCTCGCATCGA  
TGAAGGACGCAGCGAAATGCGATAAGTAATGTGAATTGCAGAATTCAGTGAATCATCGAA  
TCTTTGAACGCATCTTGCGCTCCTTGGTATTCCGAGGAGCATGCCTGTTTGAGTGTCAAT  
AAATTCTCAACTCTCTTATAC-TTTTTTGTAAGAGAGCTTGGACTGTGGAGGCTTGCT  
GGCCACTTTTTGGGGTCAGCTCCTCTGAAATGCATTAGCGGAACCGTTTGCAATCTGCCA  
CAAGTGTGATAAGTTATCTACACTGGCGAGGGGATTGCTCTCTGTAATGTTTCAGCTTCTA  
ATTGTCTCTACTTTGTGAGACAACTTTGAATGCTTGACCTCAAATCAGGTAGGACTACC  
CGCTGAACTTAA

>ABC1-39

TTTCCGTAGGTGAACCTGCGGAAGGATCATTATTGAATTATGTTTCTAGATAGGTTGTAG  
CTGGCTC-TTLAGAGCATGTGCACGCCTGTTTGGACTTCATTTTCATCCACCTGTGCACC  
TATTGTAGTCTTTGGTTGGGTTAGGGGGAAGTGGTCATTGTGTCAGCATCTGCTGGATGT  
GAGGACTTGCATTGTGAAAGCTTTGCTGTCCTTGATGTGATCATGGAATCTCTTTCTCAC  
TAGAGTCTATGTCACCTATTATACTCTGTGCAATGTCATTGAATGTCTTTACATGGGCTT  
GTATGCCTATGAAAATTGTAATACAACCTTTCAGCAACGGATCTCTTGGCTCTCGCATCGA  
TGAAGGACGCAGCGAAATGCGATAAGTAATGTGAATTGCAGAATTCAGTGAATCATCGAA  
TCTTTGAACGCATCTTGCGCTCCTTGGTATTCCGAGGAGCATGCCTGTTTGAGTGTCAAT  
AAATTCTCAACTCTCTTATAC-TTTTTTGTAAGAGAGCTTGGACTGTGGAGGCTTGCT  
GGCCACTTTTTGGGGTCAGCTCCTCTGAAATGCATTAGCGGAACCGTTTGCAATCTGCCA  
CAAGTGTGATAAGTTATCTACACTGGCGAGGGGATTGCTCTCTGTAATGTTTCAGCTTCTA  
ATTGTCTCTACTTTGTGAGACAACTTTGAATGCTTGACCTCAAATCAGGTAGGACTACC  
CGCTGAACTTAA

>ABC1-40

TTTCCGTAGGTGAACCTGCGGAAGGATCATTATTGAATTATGTTTCTAGATAGGTTGTAG  
CTGGCTC-TTLAGAGCATGTGCACGCCTGTTTGGACTTCATTTTCATCCACCTGTGCACC  
TATTGTAGTCTTTGGTTGGGTTAGGGGGAAGTGGTCATTGTGTCAGCATCTGCTGGATGT  
GAGGACTTGCATTGTGAAAGCTTTGCTGTCCTTGATGTGATCATGGAATCTCTTTCTCAC  
TAGAGTCTATGTCACCTATTATACTCTGTGCAATGTCATTGAATGTCTTTACATGGGCTT  
GTATGCCTATGAAAATTGTAATACAACCTTTCAGCAACGGATCTCTTGGCTCTCGCATCGA  
TGAAGGACGCAGCGAAATGCGATAAGTAATGTGAATTGCAGAATTCAGTGAATCATCGAA  
TCTTTGAACGCATCTTGCGCTCCTTGGTATTCCGAGGAGCATGCCTGTTTGAGTGTCAAT  
AAATTCTCAACTCTCTTATAC-TTTTTTGTAAGAGAGCTTGGACTGTGGAGGCTTGCT  
GGCCACTTTTTGGGGTCAGCTCCTCTGAAATGCATTAGCGGAACCGTTTGCAATCTGCCA  
CAAGTGTGATAAGTTATCTACACTGGCGAGGGGATTGCTCTCTGTAATGTTTCAGCTTCTA  
ATTGTCTCTACTTTGTGAGACAACTTTGAATGCTTGACCTCAAATCAGGTAGGACTACC  
CGCTGAACTTAA

>ABC1-41

TTTCCGTAGGTGAACCTGCGGAAGGATCATTATTGAATTATGTTTCTAGATAGGTTGTAG  
CTGGCTC-TTLAGAGCATGTGCACGCCTGTTTGGACTTCATTTTCATCCACCTGTGCACC  
TATTGTAGTCTTTGGTTGGGTTAGGGGGAAGTGGTCATTGTGTCAGCATCTGCTGGATGT  
GAGGACTTGCATTGTGAAAGCTTTGCTGTCCTTGATGTGATCATGGAATCTCTTTCTCAC  
TAGAGTCTATGTCACCTATTATACTCTGTGCAATGTCATTGAATGTCTTTACATGGGCTT  
GTATGCCTATGAAAATTGTAATACAACCTTTCAGCAACGGATCTCTTGGCTCTCGCATCGA  
TGAAGGACGCAGCGAAATGCGATAAGTAATGTGAATTGCAGAATTCAGTGAATCATCGAA  
TCTTTGAACGCATCTTGCGCTCCTTGGTATTCCGAGGAGCATGCCTGTTTGAGTGTCAAT  
AAATTCTCAACTCTCTTATAC-TTTTTTGTAAGAGAGCTTGGACTGTGGAGGCTTGCT  
GGCCACTTTTTGGGGTCAGCTCCTCTGAAATGCATTAGCGGAACCGTTTGCAATCTGCCA  
CAAGTGTGATAAGTTATCTACACTGGCGAGGGGATTGCTCTCTGTAATGTTTCAGCTTCTA



ATTGTCTCTACTTTGTGAGACAACTTTTGAATGCTTGACCTCAAATCAGGTAGGACTACC  
CGCTGAACTTAA

>ABC1-42

TTTCCGTAGGTGAACCTGCGGAAGGATCATTATTGAATTATGTTTCTAGATAGGTTGTAG  
CTGGCTC-TTTAGAGCATGTGCACGCCTGTTTGGACTTCATTTTCATCCACCTGTGCACC  
TATTGTAGTCTTTGGTTGGGTTAGGGGGAAGTGGTCATTGTGTCAGCATCTGCTGGATGT  
GAGGACTTGCATTGTGAAAGCTTTGCTGTCCTTGATGTGATCATGGAATCTCTTTCTCAC  
TAGAGTCTATGTCACTCATTATACTCTGTGCAATGTCATTGAATGTCTTTACATGGGCTT  
GTATGCCTATGAAAATTGTAATAACAACCTTTCAGCAACGGATCTCTTGGCTCTCGCATCGA  
TGAAGGACGCAGCGAAATGCGATAAGTAATGTGAATTGCAGAATTCAGTGAATCATCGAA  
TCTTTGAACGCATCTTGCCTCCTTGGTATTCCGAGGAGCATGCCTGTTTGAGTGTCAAT  
AAATTCTCAACTCTCTTATAC-TTTTTGTAAAAGAGAGCTTGGACTGTGGAGGCTTGCT  
GGCCACTTTTTGGGGTCAGCTCCTCTGAAATGCATTAGCGGAACCGTTTGCAATCTGCCA  
CAAGTGTGATAAGTTATCTAAGTGGCGAGGGGATTGCTCTCTGTAATGTTTCAAGCTTCTA  
ATTGTCTCTACTTTGTGAGACAACTTTTGAATGCTTGACCTCAAATCAGGTAGGACTACC  
CGCTGAACTTAA

>ABC1-44

TTTCCGTAGGTGAACCTGCGGAAGGATCATTATTGAATTATGTTTCTAGATAGGTTGTAG  
CTGGCTC-TTTAGAGCATGTGCACGCCTGTTTGGACTTCATTTTCATCCACCTGTGCACC  
TATTGTAGTCTTTGGTTGGGTTAGGGGGAAGTGGTCATTGTGTCAGCATCTGCTGGATGT  
GAGGACTTGCATTGTGAAAGCTTTGCTGTCCTTGATGTGATCATGGAATCTCTTTCTCAC  
TAGAGTCTATGTCACTCATTATACTCTGTGCAATGTCATTGAATGTCTTTACATGGGCTT  
GTATGCCTATGAAAATTGTAATAACAACCTTTCAGCAACGGATCTCTTGGCTCTCGCATCGA  
TGAAGGACGCAGCGAAATGCGATAAGTAATGTGAATTGCAGAATTCAGTGAATCATCGAA  
TCTTTGAACGCATCTTGCCTCCTTGGTATTCCGAGGAGCATGCCTGTTTGAGTGTCAAT  
AAATTCTCAACTCTCTTATAC-TTTTTGTAAAAGAGAGCTTGGACTGTGGAGGCTTGCT  
GGCCACTTTTTGGGGTCAGCTCCTCTGAAATGCATTAGCGGAACCGTTTGCAATCTGCCA  
CAAGTGTGATAAGTTATCTAAGTGGCGAGGGGATTGCTCTCTGTAATGTTTCAAGCTTCTA  
ATTGTCTCTACTTTGTGAGACAACTTTTGAATGCTTGACCTCAAATCAGGTAGGACTACC  
CGCTGAACTTAA

>ABC1-49

TTTCCGTAGGTGAACCTGCGGAAGGATCATTATTGAATTATGTTTCTAGATAGGTTGTAG  
CTGGCTC-TTTAGAGCATGTGCACGCCTGTTTGGACTTCATTTTCATCCACCTGTGCACC  
TATTGTAGTCTTTGGTTGGGTTAGGGGGAAGTGGTCATTGTGTCAGCATCTGCTGGATGT  
GAGGACTTGCATTGTGAAAGCTTTGCTGTCCTTGATGTGATCATGGAATCTCTTTCTCAC  
TAGAGTCTATGTCACTCATTATACTCTGTGCAATGTCATTGAATGTCTTTACATGGGCTT  
GTATGCCTATGAAAATTGTAATAACAACCTTTCAGCAACGGATCTCTTGGCTCTCGCATCGA  
TGAAGGACGCAGCGAAATGCGATAAGTAATGTGAATTGCAGAATTCAGTGAATCATCGAA  
TCTTTGAACGCATCTTGCCTCCTTGGTATTCCGAGGAGCATGCCTGTTTGAGTGTCAAT  
AAATTCTCAACTCTCTTATAC-TTTTTGTAAAAGAGAGCTTGGACTGTGGAGGCTTGCT  
GGCCACTTTTTGGGGTCAGCTCCTCTGAAATGCATTAGCGGAACCGTTTGCAATCTGCCA  
CAAGTGTGATAAGTTATCTAAGTGGCGAGGGGATTGCTCTCTGTAATGTTTCAAGCTTCTA  
ATTGTCTCTACTTTGTGAGACAACTTTTGAATGCTTGACCTCAAATCAGGTAGGACTACC  
CGCTGAACTTAA

>ABC1-55

TTTCCGTAGGTGAACCTGCGGAAGGATCATTATTGAATTATGTTTCTAGATAGGTTGTAG  
CTGGCTC-TTTAGAGCATGTGCACGCCTGTTTGGACTTCATTTTCATCCACCTGTGCACC  
TATTGTAGTCTTTGGTTGGGTTAGGGGGAAGTGGTCATTGTGTCAGCATCTGCTGGATGT  
GAGGACTTGCATTGTGAAAGCTTTGCTGTCCTTGATGTGATCATGGAATCTCTTTCTCAC  
TAGAGTCTATGTCACTCATTATACTCTGTGCAATGTCATTGAATGTCTTTACATGGGCTT



GTATGCCTATGAAAATTGTAATACAACCTTTTCAGCAACGGATCTCTTGGCTCTCGCATCGA  
TGAAGGACGCAGCGAAATGCGATAAGTAATGTGAATTGCAGAATTCAGTGAATCATCGAA  
TCTTTGAACGCATCTTGCCTCCTTGGTATTCCGAGGAGCATGCCTGTTTGAGTGTCAAT  
AAATTCTCAACTCTCTTATAC-TTTTTTGAAAAGAGAGCTTGGACTGTGGAGGCTTGCT  
GGCCACTTTTTGGGGTCAGCTCCTCTGAAATGCATTAGCGGAACCGTTTGCAATCTGCCA  
CAAGTGTGATAAGTTATCTACACTGGCGAGGGGATTGCTCTCTGTAATGTTTCAGCTTCTA  
ATTGTCTCTACTTTGTGAGACAACCTTTGAATGCTTGACCTCAAATCAGGTAGGACTACC  
CGCTGAACTTAA

>ABC1-57

TTTCCGTAGGTGAACCTGCGGAAGGATCATTATTGAATTATGTTTCTAGATAGGTTGTAG  
CTGGCTC-TTLAGAGCATGTGCACGCCTGTTTGGACTTCATTTTCATCCACCTGTGCACC  
TATTGTAGTCTTTGGTTGGGTTAGGGGGAAGTGGTCATTGTGTCAGCATCTGCTGGATGT  
GAGGACTTGCATTGTGAAAGCTTTGCTGTCCTTGATGTGATCATGGAATCTCTTTCTCAC  
TAGAGTCTATGTCACCTCATTATACTCTGTCTGAATGTCATTGAATGTCTTTACATGGGCTT  
GTATGCCTATGAAAATTGTAATACAACCTTTTCAGCAACGGATCTCTTGGCTCTCGCATCGA  
TGAAGGACGCAGCGAAATGCGATAAGTAATGTGAATTGCAGAATTCAGTGAATCATCGAA  
TCTTTGAACGCATCTTGCCTCCTTGGTATTCCGAGGAGCATGCCTGTTTGAGTGTCAAT  
AAATTCTCAACTCTCTTATAC-TTTTTTGAAAAGAGAGCTTGGACTGTGGAGGCTTGCT  
GGCCACTTTTTGGGGTCAGCTCCTCTGAAATGCATTAGCGGAACCGTTTGCAATCTGCCA  
CAAGTGTGATAAGTTATCTACACTGGCGAGGGGATTGCTCTCTGTAATGTTTCAGCTTCTA  
ATTGTCTCTACTTTGTGAGACAACCTTTGAATGCTTGACCTCAAATCAGGTAGGACTACC  
CGCTGAACTTAA

>ABC1-63

TTTCCGTAGGTGAACCTGCGGAAGGATCATTATTGAATTATGTTTCTAGATAGGTTGTAG  
CTGGCTC-TTLAGAGCATGTGCACGCCTGTTTGGACTTCATTTTCATCCACCTGTGCACC  
TATTGTAGTCTTTGGTTGGGTTAGGGGGAAGTGGTCATTGTGTCAGCATCTGCTGGATGT  
GAGGACTTGCATTGTGAAAGCTTTGCTGTCCTTGATGTGATCATGGAATCTCTTTCTCAC  
TAGAGTCTATGTCACCTCATTATACTCTGTCTGAATGTCATTGAATGTCTTTACATGGGCTT  
GTATGCCTATGAAAATTGTAATACAACCTTTTCAGCAACGGATCTCTTGGCTCTCGCATCGA  
TGAAGGACGCAGCGAAATGCGATAAGTAATGTGAATTGCAGAATTCAGTGAATCATCGAA  
TCTTTGAACGCATCTTGCCTCCTTGGTATTCCGAGGAGCATGCCTGTTTGAGTGTCAAT  
AAATTCTCAACTCTCTTATAC-TTTTTTGAAAAGAGAGCTTGGACTGTGGAGGCTTGCT  
GGCCACTTTTTGGGGTCAGCTCCTCTGAAATGCATTAGCGGAACCGTTTGCAATCTGCCA  
CAAGTGTGATAAGTTATCTACACTGGCGAGGGGATTGCTCTCTGTAATGTTTCAGCTTCTA  
ATTGTCTCTACTTTGTGAGACAACCTTTGAATGCTTGACCTCAAATCAGGTAGGACTACC  
CGCTGAACTTAA

>ABC1-65

TTTCCGTAGGTGAACCTGCGGAAGGATCATTATTGAATTATGTTTCTAGATAGGTTGTAG  
CTGGCTC-TTLAGAGCATGTGCACGCCTGTTTGGACTTCATTTTCATCCACCTGTGCACC  
TATTGTAGTCTTTGGTTGGGTTAGGGGGAAGTGGTCATTGTGTCAGCATCTGCTGGATGT  
GAGGACTTGCATTGTGAAAGCTTTGCTGTCCTTGATGTGATCATGGAATCTCTTTCTCAC  
TAGAGTCTATGTCACCTCATTATACTCTGTCTGAATGTCATTGAATGTCTTTACATGGGCTT  
GTATGCCTATGAAAATTGTAATACAACCTTTTCAGCAACGGATCTCTTGGCTCTCGCATCGA  
TGAAGGACGCAGCGAAATGCGATAAGTAATGTGAATTGCAGAATTCAGTGAATCATCGAA  
TCTTTGAACGCATCTTGCCTCCTTGGTATTCCGAGGAGCATGCCTGTTTGAGTGTCAAT  
AAATTCTCAACTCTCTTATAC-TTTTTTGAAAAGAGAGCTTGGACTGTGGAGGCTTGCT  
GGCCACTTTTTGGGGTCAGCTCCTCTGAAATGCATTAGCGGAACCGTTTGCAATCTGCCA  
CAAGTGTGATAAGTTATCTACACTGGCGAGGGGATTGCTCTCTGTAATGTTTCAGCTTCTA  
ATTGTCTCTACTTTGTGAGACAACCTTTGAATGCTTGACCTCAAATCAGGTAGGACTACC  
CGCTGAACTTAA



>ABC1-67

TTTCCGTAGGTGAACCTGCGGAAGGATCATTATTGAATTATGTTTCTAGATAGGTTGTAG  
CTGGCTC-TTTAGAGCATGTGCACGCCTGTTTGGACTTCATTTTCATCCACCTGTGCACC  
TATTGTAGTCTTTGGTTGGGTTAGGGGGAAGTGGTCATTGTGTCAGCATCTGCTGGATGT  
GAGGACTTGCATTGTGAAAGCTTTGCTGTCCTTGATGTGATCATGGAATCTCTTTCTCAC  
TAGAGTCTATGTCACCTCATTATACTCTGTGCGAATGTCATTGAATGTCTTTACATGGGCTT  
GTATGCCTATGAAAATTGTAATACAACCTTTCAGCAACGGATCTCTTGGCTCTCGCATCGA  
TGAAGGACGCAGCGAAATGCGATAAGTAATGTGAATTGCAGAATTCAGTGAATCATCGAA  
TCTTTGAACGCATCTTGCGCTCCTTGGTATTCCGAGGAGCATGCCTGTTTGAGTGTCAAT  
AAATTCTCAACTCTCTTATAC-TTTTTGTAAAAGAGAGCTTGGACTGTGGAGGCTTGCT  
GGCCACTTTTTGGGGTCAGCTCCTCTGAAATGCATTAGCGGAACCGTTTGCAATCTGCCA  
CAAGTGTGATAAGTTATCTACACTGGCGAGGGGATTGCTCTCTGTAATGTTTCAGCTTCTA  
ATTGTCTCTACTTTGTGAGACAACTTTTGAATGCTTGACCTCAAATCAGGTAGGACTACC  
CGCTGAACTTAA

>ABC1-68

TTTCCGTAGGTGAACCTGCGGAAGGATCATTATTGAATTATGTTTCTAGATAGGTTGTAG  
CTGGCTC-TTTAGAGCATGTGCACGCCTGTTTGGACTTCATTTTCATCCACCTGTGCACC  
TATTGTAGTCTTTGGTTGGGTTAGGGGGAAGTGGTCATTGTGTCAGCATCTGCTGGATGT  
GAGGACTTGCATTGTGAAAGCTTTGCTGTCCTTGATGTGATCATGGAATCTCTTTCTCAC  
TAGAGTCTATGTCACCTCATTATACTCTGTGCGAATGTCATTGAATGTCTTTACATGGGCTT  
GTATGCCTATGAAAATTGTAATACAACCTTTCAGCAACGGATCTCTTGGCTCTCGCATCGA  
TGAAGGACGCAGCGAAATGCGATAAGTAATGTGAATTGCAGAATTCAGTGAATCATCGAA  
TCTTTGAACGCATCTTGCGCTCCTTGGTATTCCGAGGAGCATGCCTGTTTGAGTGTCAAT  
AAATTCTCAACTCTCTTATAC-TTTTTGTAAAAGAGAGCTTGGACTGTGGAGGCTTGCT  
GGCCACTTTTTGGGGTCAGCTCCTCTGAAATGCATTAGCGGAACCGTTTGCAATCTGCCA  
CAAGTGTGATAAGTTATCTACACTGGCGAGGGGATTGCTCTCTGTAATGTTTCAGCTTCTA  
ATTGTCTCTACTTTGTGAGACAACTTTTGAATGCTTGACCTCAAATCAGGTAGGACTACC  
CGCTGAACTTAA

>ABC1-70

TTTCCGTAGGTGAACCTGCGGAAGGATCATTATTGAATTATGTTTCTAGATAGGTTGTAG  
CTGGCTC-TTTAGAGCATGTGCACGCCTGTTTGGACTTCATTTTCATCCACCTGTGCACC  
TATTGTAGTCTTTGGTTGGGTTAGGGGGAAGTGGTCATTGTGTCAGCATCTGCTGGATGT  
GAGGACTTGCATTGTGAAAGCTTTGCTGTCCTTGATGTGATCATGGAATCTCTTTCTCAC  
TAGAGTCTATGTCACCTCATTATACTCTGTGCGAATGTCATTGAATGTCTTTACATGGGCTT  
GTATGCCTATGAAAATTGTAATACAACCTTTCAGCAACGGATCTCTTGGCTCTCGCATCGA  
TGAAGGACGCAGCGAAATGCGATAAGTAATGTGAATTGCAGAATTCAGTGAATCATCGAA  
TCTTTGAACGCATCTTGCGCTCCTTGGTATTCCGAGGAGCATGCCTGTTTGAGTGTCAAT  
AAATTCTCAACTCTCTTATAC-TTTTTGTAAAAGAGAGCTTGGACTGTGGAGGCTTGCT  
GGCCACTTTTTGGGGTCAGCTCCTCTGAAATGCATTAGCGGAACCGTTTGCAATCTGCCA  
CAAGTGTGATAAGTTATCTACACTGGCGAGGGGATTGCTCTCTGTAATGTTTCAGCTTCTA  
ATTGTCTCTACTTTGTGAGACAACTTTTGAATGCTTGACCTCAAATCAGGTAGGACTACC  
CGCTGAACTTAA

>ABC2-2

TTTCCGTAGGTGAACCTGCGGAAGGATCATTATTGAATTATGTTTCTAGATAGGTTGTAG  
CTGGCTC-TTTAGAGCATGTGCACGCCTGTTTGGACTTCATTTTCATCCACCTGTGCACC  
TATTGTAGTCTTTGGTTGGGTTAGGGGGAAGTGGTCATTGTGTCAGCATCTGCTGGATGT  
GAGGACTTGCATTGTGAAAGCTTTGCTGTCCTTGATGTGATCATGGAATCTCTTTCTCAC  
TAGAGTCTATGTCACCTCATTATACTCTGTGCGAATGTCATTGAATGTCTTTACATGGGCTT  
GTATGCCTATGAAAATTGTAATACAACCTTTCAGCAACGGATCTCTTGGCTCTCGCATCGA  
TGAAGGACGCAGCGAAATGCGATAAGTAATGTGAATTGCAGAATTCAGTGAATCATCGAA



TCTTTGAACGCATCTTGCGCTCCTTGGTATTCCGAGGAGCATGCCTGTTTGAGTGTCAATT  
AAATTCTCAACTCTCTTATAC-TTTTTGTAAAAGAGAGCTTGGACTGTGGAGGCTTGCT  
GGCCACTTTTTGGGGTCAGCTCCTCTGAAATGCATTAGCGGAACCGTTTGCAATCTGCCA  
CAAGTGTGATAAGTTATCTACACTGGCGAGGGGATTGCTCTCTGTAATGTTTCACTTCTA  
ATTGTCTCTACTTTGTGAGACAACTTTGAATGCTTGACCTCAAATCAGGTAGGACTACC  
CGCTGAACTTAA

>ABC2-7

TTTCCGTAGGTGAACCTGCGGAAGGATCATTATTGAATTATGTTTCTAGATAGGTTGTAG  
CTGGCTC-TTTAGAGCATGTGCACGCCTGTTTGGACTTCATTTTCATCCACCTGTGCACC  
TATTGTAGTCTTTGGTTGGGTTAGGGGGAAGTGGTCATTGTGTCAGCATCTGCTGGATGT  
GAGGACTTGCAATTGTGAAAGCTTTGCTGTCCTTGATGTGATCATGGAATCTCTTTCTCAC  
TAGAGTCTATGTCACTCATTATACTCTGTGCAATGTCATTGAATGTCTTTACATGGGCTT  
GTATGCCTATGAAAATTGTAATACAACCTTTAGCAACGGATCTCTTGGCTCTCGCATCGA  
TGAAGGACGCAGCGAAATGCGATAAGTAATGTGAATTGCAGAATTCAGTGAATCATCGAA  
TCTTTGAACGCATCTTGCGCTCCTTGGTATTCCGAGGAGCATGCCTGTTTGAGTGTCAATT  
AAATTCTCAACTCTCTTATAC-TTTTTGTAAAAGAGAGCTTGGACTGTGGAGGCTTGCT  
GGCCACTTTTTGGGGTCAGCTCCTCTGAAATGCATTAGCGGAACCGTTTGCAATCTGCCA  
CAAGTGTGATAAGTTATCTACACTGGCGAGGGGATTGCTCTCTGTAATGTTTCACTTCTA  
ATTGTCTCTACTTTGTGAGACAACTTTGAATGCTTGACCTCAAATCAGGTAGGACTACC  
CGCTGAACTTAA

>ABC2-10

TTTCCGTAGGTGAACCTGCGGAAGGATCATTATTGAATTATGTTTCTAGATAGGTTGTAG  
CTGGCTC-TTTAGAGCATGTGCACGCCTGTTTGGACTTCATTTTCATCCACCTGTGCACC  
TATTGTAGTCTTTGGTTGGGTTAGGGGGAAGTGGTCATTGTGTCAGCATCTGCTGGATGT  
GAGGACTTGCAATTGTGAAAGCTTTGCTGTCCTTGATGTGATCATGGAATCTCTTTCTCAC  
TAGAGTCTATGTCACTCATTATACTCTGTGCAATGTCATTGAATGTCTTTACATGGGCTT  
GTATGCCTATGAAAATTGTAATACAACCTTTAGCAACGGATCTCTTGGCTCTCGCATCGA  
TGAAGGACGCAGCGAAATGCGATAAGTAATGTGAATTGCAGAATTCAGTGAATCATCGAA  
TCTTTGAACGCATCTTGCGCTCCTTGGTATTCCGAGGAGCATGCCTGTTTGAGTGTCAATT  
AAATTCTCAACTCTCTTATAC-TTTTTGTAAAAGAGAGCTTGGACTGTGGAGGCTTGCT  
GGCCACTTTTTGGGGTCAGCTCCTCTGAAATGCATTAGCGGAACCGTTTGCAATCTGCCA  
CAAGTGTGATAAGTTATCTACACTGGCGAGGGGATTGCTCTCTGTAATGTTTCACTTCTA  
ATTGTCTCTACTTTGTGAGACAACTTTGAATGCTTGACCTCAAATCAGGTAGGACTACC  
CGCTGAACTTAA

>ABC2-12

TTTCCGTAGGTGAACCTGCGGAAGGATCATTATTGAATTATGTTTCTAGATAGGTTGTAG  
CTGGCTC-TTTAGAGCATGTGCACGCCTGTTTGGACTTCATTTTCATCCACCTGTGCACC  
TATTGTAGTCTTTGGTTGGGTTAGGGGGAAGTGGTCATTGTGTCAGCATCTGCTGGATGT  
GAGGACTTGCAATTGTGAAAGCTTTGCTGTCCTTGATGTGATCATGGAATCTCTTTCTCAC  
TAGAGTCTATGTCACTCATTATACTCTGTGCAATGTCATTGAATGTCTTTACATGGGCTT  
GTATGCCTATGAAAATTGTAATACAACCTTTAGCAACGGATCTCTTGGCTCTCGCATCGA  
TGAAGGACGCAGCGAAATGCGATAAGTAATGTGAATTGCAGAATTCAGTGAATCATCGAA  
TCTTTGAACGCATCTTGCGCTCCTTGGTATTCCGAGGAGCATGCCTGTTTGAGTGTCAATT  
AAATTCTCAACTCTCTTATAC-TTTTTGTAAAAGAGAGCTTGGACTGTGGAGGCTTGCT  
GGCCACTTTTTGGGGTCAGCTCCTCTGAAATGCATTAGCGGAACCGTTTGCAATCTGCCA  
CAAGTGTGATAAGTTATCTACACTGGCGAGGGGATTGCTCTCTGTAATGTTTCACTTCTA  
ATTGTCTCTACTTTGTGAGACAACTTTGAATGCTTGACCTCAAATCAGGTAGGACTACC  
CGCTGAACTTAA

>ABC2-23

TTTCCGTAGGTGAACCTGCGGAAGGATCATTATTGAATTATGTTTCTAGATAGGTTGTAG



CTGGCTC-TTTAGAGCATGTGCACGCCTGTTTGGACTTCATTTTCATCCACCTGTGCACC  
TATTGTAGTCTTTGGTTGGGTTAGGGGGAAGTGGTCATTGTGTCAGCATCTGCTGGATGT  
GAGGACTTGCATTGTGAAAGCTTTGCTGTCCTTGATGTGATCATGGAATCTCTTTCTCAC  
TAGAGTCTATGTCACCTATTATACTCTGTGCAATGTCATTGAATGTCTTTACATGGGCTT  
GTATGCCTATGAAAATTGTAATACAACCTTTCAGCAACGGATCTCTTGGCTCTCGCATCGA  
TGAAGGACGCAGCGAAATGCGATAAGTAATGTGAATTGCAGAATTCAGTGAATCATCGAA  
TCTTTGAACGCATCTTGCCTCCTTGGTATTCCGAGGAGCATGCCTGTTTGAGTGTCAAT  
AAATTCTCAACTCTCTTATAC-TTTTTTGTAAGAGAGCTTGGACTGTGGAGGCTTGCT  
GGCCACTTTTTGGGGTCAGCTCCTCTGAAATGCATTAGCGGAACCGTTTGCAATCTGCCA  
CAAGTGTGATAAGTTATCTACACTGGCGAGGGGATTGCTCTCTGTAATGTTGAGCTTCTA  
ATTGTCTCTACTTTGTGAGACAACCTTTGAATGCTTGACCTCAAATCAGGTAGGACTACC  
CGCTGAACTTAA

>ABC2-24

TTTCCGTAGGTGAACCTGCGGAAGGATCATTATTGAATTATGTTTCTAGATAGGTTGTAG  
CTGGCTC-TTTAGAGCATGTGCACGCCTGTTTGGACTTCATTTTCATCCACCTGTGCACC  
TATTGTAGTCTTTGGTTGGGTTAGGGGGAAGTGGTCATTGTGTCAGCATCTGCTGGATGT  
GAGGACTTGCATTGTGAAAGCTTTGCTGTCCTTGATGTGATCATGGAATCTCTTTCTCAC  
TAGAGTCTATGTCACCTATTATACTCTGTGCAATGTCATTGAATGTCTTTACATGGGCTT  
GTATGCCTATGAAAATTGTAATACAACCTTTCAGCAACGGATCTCTTGGCTCTCGCATCGA  
TGAAGGACGCAGCGAAATGCGATAAGTAATGTGAATTGCAGAATTCAGTGAATCATCGAA  
TCTTTGAACGCATCTTGCCTCCTTGGTATTCCGAGGAGCATGCCTGTTTGAGTGTCAAT  
AAATTCTCAACTCTCTTATAC-TTTTTTGTAAGAGAGCTTGGACTGTGGAGGCTTGCT  
GGCCACTTTTTGGGGTCAGCTCCTCTGAAATGCATTAGCGGAACCGTTTGCAATCTGCCA  
CAAGTGTGATAAGTTATCTACACTGGCGAGGGGATTGCTCTCTGTAATGTTGAGCTTCTA  
ATTGTCTCTACTTTGTGAGACAACCTTTGAATGCTTGACCTCAAATCAGGTAGGACTACC  
CGCTGAACTTAA

>ABC2-67

TTTCCGTAGGTGAACCTGCGGAAGGATCATTATTGAATTATGTTTCTAGATAGGTTGTAG  
CTGGCTC-TTTAGAGCATGTGCACGCCTGTTTGGACTTCATTTTCATCCACCTGTGCACC  
TATTGTAGTCTTTGGTTGGGTTAGGGGGAAGTGGTCATTGTGTCAGCATCTGCTGGATGT  
GAGGACTTGCATTGTGAAAGCTTTGCTGTCCTTGATGTGATCATGGAATCTCTTTCTCAC  
TAGAGTCTATGTCACCTATTATACTCTGTGCAATGTCATTGAATGTCTTTACATGGGCTT  
GTATGCCTATGAAAATTGTAATACAACCTTTCAGCAACGGATCTCTTGGCTCTCGCATCGA  
TGAAGGACGCAGCGAAATGCGATAAGTAATGTGAATTGCAGAATTCAGTGAATCATCGAA  
TCTTTGAACGCATCTTGCCTCCTTGGTATTCCGAGGAGCATGCCTGTTTGAGTGTCAAT  
AAATTCTCAACTCTCTTATAC-TTTTTTGTAAGAGAGCTTGGACTGTGGAGGCTTGCT  
GGCCACTTTTTGGGGTCAGCTCCTCTGAAATGCATTAGCGGAACCGTTTGCAATCTGCCA  
CAAGTGTGATAAGTTATCTACACTGGCGAGGGGATTGCTCTCTGTAATGTTGAGCTTCTA  
ATTGTCTCTACTTTGTGAGACAACCTTTGAATGCTTGACCTCAAATCAGGTAGGACTACC  
CGCTGAACTTAA

>ABC2-77

TTTCCGTAGGTGAACCTGCGGAAGGATCATTATTGAATTATGTTTCTAGATAGGTTGTAG  
CTGGCTC-TTTAGAGCATGTGCACGCCTGTTTGGACTTCATTTTCATCCACCTGTGCACC  
TATTGTAGTCTTTGGTTGGGTTAGGGGGAAGTGGTCATTGTGTCAGCATCTGCTGGATGT  
GAGGACTTGCATTGTGAAAGCTTTGCTGTCCTTGATGTGATCATGGAATCTCTTTCTCAC  
TAGAGTCTATGTCACCTATTATACTCTGTGCAATGTCATTGAATGTCTTTACATGGGCTT  
GTATGCCTATGAAAATTGTAATACAACCTTTCAGCAACGGATCTCTTGGCTCTCGCATCGA  
TGAAGGACGCAGCGAAATGCGATAAGTAATGTGAATTGCAGAATTCAGTGAATCATCGAA  
TCTTTGAACGCATCTTGCCTCCTTGGTATTCCGAGGAGCATGCCTGTTTGAGTGTCAAT  
AAATTCTCAACTCTCTTATAC-TTTTTTGTAAGAGAGCTTGGACTGTGGAGGCTTGCT



GGCCACTTTTTGGGGTCAGCTCCTCTGAAATGCATTAGCGGAACCGTTTGCAATCTGCCA  
CAAGTGTGATAAGTTATCTACACTGGCGAGGGGATTGCTCTCTGTAATGTTGAGCTTCTA  
ATTGTCTCTACTTTGTGAGACAACTTTGAATGCTTGACCTCAAATCAGGTAGGACTACC  
CGCTGAACTTAA

>ABC4-3

TTTCCGTAGGTGAACCTGCGGAAGGATCATTATTGAATTATGTTTCTAGATAGGTTGTAG  
CTGGCTC-TTTAGAGCATGTGCACGCCTGTTTGGACTTCATTTTCATCCACCTGTGCACC  
TATTGTAGTCTTTGGTTGGGTTAGGGGGAAGTGGTCATTGTGTCAGCATCTGCTGGATGT  
GAGGACTTGCATTGTGAAAGCTTTGCTGTCCTTGATGTGATCATGGAATCTCTTTCTCAC  
TAGAGTCTATGTCACTCATTATACTCTGTGCAATGTCATTGAATGTCTTTACATGGGCTT  
GTATGCCTATGAAAATTGTAATACTTTTTCAGCAACGGATCTCTTGGCTCTCGCATCGA  
TGAAGGACGCAGCGAAATGCGATAAGTAATGTGAATTGCAGAATTCAGTGAATCATCGAA  
TCTTTGAACGCATCTTGCGCTCCTTGGTATTCCGAGGAGCATGCCTGTTTGAGTGTGATT  
AAATTCTCAACTCTCTTATAC-TTTTTGTAAAAGAGAGCTTGGACTGTGGAGGCTTGCT  
GGCCACTTTTTGGGGTCAGCTCCTCTGAAATGCATTAGCGGAACCGTTTGCAATCTGCCA  
CAAGTGTGATAAGTTATCTACACTGGCGAGGGGATTGCTCTCTGTAATGTTGAGCTTCTA  
ATTGTCTCTACTTTGTGAGACAACTTTGAATGCTTGACCTCAAATCAGGTAGGACTACC  
CGCTGAACTTAA

>ABC4-21

TTTCCGTAGGTGAACCTGCGGAAGGATCATTATTGAATTATGTTTCTAGATAGGTTGTAG  
CTGGCTC-TTTAGAGCATGTGCACGCCTGTTTGGACTTCATTTTCATCCACCTGTGCACC  
TATTGTAGTCTTTGGTTGGGTTAGGGGGAAGTGGTCATTGTGTCAGCATCTGCTGGATGT  
GAGGACTTGCATTGTGAAAGCTTTGCTGTCCTTGATGTGATCATGGAATCTCTTTCTCAC  
TAGAGTCTATGTCACTCATTATACTCTGTGCAATGTCATTGAATGTCTTTACATGGGCTT  
GTATGCCTATGAAAATTGTAATACTTTTTCAGCAACGGATCTCTTGGCTCTCGCATCGA  
TGAAGGACGCAGCGAAATGCGATAAGTAATGTGAATTGCAGAATTCAGTGAATCATCGAA  
TCTTTGAACGCATCTTGCGCTCCTTGGTATTCCGAGGAGCATGCCTGTTTGAGTGTGATT  
AAATTCTCAACTCTCTTATAC-TTTTTGTAAAAGAGAGCTTGGACTGTGGAGGCTTGCT  
GGCCACTTTTTGGGGTCAGCTCCTCTGAAATGCATTAGCGGAACCGTTTGCAATCTGCCA  
CAAGTGTGATAAGTTATCTACACTGGCGAGGGGATTGCTCTCTGTAATGTTGAGCTTCTA  
ATTGTCTCTACTTTGTGAGACAACTTTGAATGCTTGACCTCAAATCAGGTAGGACTACC  
CGCTGAACTTAA

>ABC5-63

TTTCCGTAGGTGAACCTGCGGAAGGATCATTATTGAATTATGTTTCTAGATAGGTTGTAG  
CTGGCTC-TTTAGAGCATGTGCACGCCTGTTTGGACTTCATTTTCATCCACCTGTGCACC  
TATTGTAGTCTTTGGTTGGGTTAGGGGGAAGTGGTCATTGTGTCAGCATCTGCTGGATGT  
GAGGACTTGCATTGTGAAAGCTTTGCTGTCCTTGATGTGATCATGGAATCTCTTTCTCAC  
TAGAGTCTATGTCACTCATTATACTCTGTGCAATGTCATTGAATGTCTTTACATGGGCTT  
GTATGCCTATGAAAATTGTAATACTTTTTCAGCAACGGATCTCTTGGCTCTCGCATCGA  
TGAAGGACGCAGCGAAATGCGATAAGTAATGTGAATTGCAGAATTCAGTGAATCATCGAA  
TCTTTGAACGCATCTTGCGCTCCTTGGTATTCCGAGGAGCATGCCTGTTTGAGTGTGATT  
AAATTCTCAACTCTCTTATAC-TTTTTGTAAAAGAGAGCTTGGACTGTGGAGGCTTGCT  
GGCCACTTTTTGGGGTCAGCTCCTCTGAAATGCATTAGCGGAACCGTTTGCAATCTGCCA  
CAAGTGTGATAAGTTATCTACACTGGCGAGGGGATTGCTCTCTGTAATGTTGAGCTTCTA  
ATTGTCTCTACTTTGTGAGACAACTTTGAATGCTTGACCTCAAATCAGGTAGGACTACC  
CGCTGAACTTAA

>ABC6-39

TTTCCGTAGGTGAACCTGCGGAAGGATCATTATTGAATTATGTTTCTAGATAGGTTGTAG  
CTGGCTC-TTTAGAGCATGTGCACGCCTGTTTGGACTTCATTTTCATCCACCTGTGCACC  
TATTGTAGTCTTTGGTTGGGTTAGGGGGAAGTGGTCATTGTGTCAGCATCTGCTGGATGT



GAGGACTTGCATTGTGAAAGCTTTGCTGTCCTTGATGTGATCATGGAATCTCTTTCTCAC  
TAGAGTCTATGTCACCTATTATACTCTGTGCAATGTCATTGAATGTCTTTACATGGGCTT  
GTATGCCTATGAAAATTGTAATACAACCTTTCAGCAACGGATCTCTTGGCTCTCGCATCGA  
TGAAGGACGCAGCGAAATGCGATAAGTAATGTGAATTGCAGAATTCAGTGAATCATCGAA  
TCTTTGAACGCATCTTGCGCTCCTTGGTATTCCGAGGAGCATGCCTGTTTGAGTGTCAAT  
AAATTCTCAACTCTCTTATAC-TTTTTTGAAAAGAGAGCTTGGACTGTGGAGGCTTGCT  
GGCCACTTTTTGGGGTCAGCTCCTCTGAAATGCATTAGCGGAACCGTTTGCAATCTGCCA  
CAAGTGTGATAAGTTATCTACACTGGCGAGGGGATTGCTCTCTGTAATGTTTCAGCTTCTA  
ATTGTCTCTACTTTGTGAGACAACTTTTGAATGCTTGACCTCAAATCAGGTAGGACTACC  
CGCTGAACTTAA

>ABC6-49

TTTCCGTAGGTGAACCTGCGGAAGGATCATTATTGAATTATGTTTCTAGATAGGTTGTAG  
CTGGCTC-TTTAGAGCATGTGCACGCCTGTTTGGACTTCATTTTCATCCACCTGTGCACC  
TATTGTAGTCTTTGGTTGGGTTAGGGGGAAGTGGTCATTGTGTCAGCATCTGCTGGATGT  
GAGGACTTGCATTGTGAAAGCTTTGCTGTCCTTGATGTGATCATGGAATCTCTTTCTCAC  
TAGAGTCTATGTCACCTATTATACTCTGTGCAATGTCATTGAATGTCTTTACATGGGCTT  
GTATGCCTATGAAAATTGTAATACAACCTTTCAGCAACGGATCTCTTGGCTCTCGCATCGA  
TGAAGGACGCAGCGAAATGCGATAAGTAATGTGAATTGCAGAATTCAGTGAATCATCGAA  
TCTTTGAACGCATCTTGCGCTCCTTGGTATTCCGAGGAGCATGCCTGTTTGAGTGTCAAT  
AAATTCTCAACTCTCTTATAC-TTTTTTGAAAAGAGAGCTTGGACTGTGGAGGCTTGCT  
GGCCACTTTTTGGGGTCAGCTCCTCTGAAATGCATTAGCGGAACCGTTTGCAATCTGCCA  
CAAGTGTGATAAGTTATCTACACTGGCGAGGGGATTGCTCTCTGTAATGTTTCAGCTTCTA  
ATTGTCTCTACTTTGTGAGACAACTTTTGAATGCTTGACCTCAAATCAGGTAGGACTACC  
CGCTGAACTTAA

>ABC7-19

TTTCCGTAGGTGAACCTGCGGAAGGATCATTATTGAATTATGTTTCTAGATAGGTTGTAG  
CTGGCTC-TTTAGAGCATGTGCACGCCTGTTTGGACTTCATTTTCATCCACCTGTGCACC  
TATTGTAGTCTTTGGTTGGGTTAGGGGGAAGTGGTCATTGTGTCAGCATCTGCTGGATGT  
GAGGACTTGCATTGTGAAAGCTTTGCTGTCCTTGATGTGATCATGGAATCTCTTTCTCAC  
TAGAGTCTATGTCACCTATTATACTCTGTGCAATGTCATTGAATGTCTTTACATGGGCTT  
GTATGCCTATGAAAATTGTAATACAACCTTTCAGCAACGGATCTCTTGGCTCTCGCATCGA  
TGAAGGACGCAGCGAAATGCGATAAGTAATGTGAATTGCAGAATTCAGTGAATCATCGAA  
TCTTTGAACGCATCTTGCGCTCCTTGGTATTCCGAGGAGCATGCCTGTTTGAGTGTCAAT  
AAATTCTCAACTCTCTTATAC-TTTTTTGAAAAGAGAGCTTGGACTGTGGAGGCTTGCT  
GGCCACTTTTTGGGGTCAGCTCCTCTGAAATGCATTAGCGGAACCGTTTGCAATCTGCCA  
CAAGTGTGATAAGTTATCTACACTGGCGAGGGGATTGCTCTCTGTAATGTTTCAGCTTCTA  
ATTGTCTCTACTTTGTGAGACAACTTTTGAATGCTTGACCTCAAATCAGGTAGGACTACC  
CGCTGAACTTAA

>ABC7-51

TTTCCGTAGGTGAACCTGCGGAAGGATCATTATTGAATTATGTTTCTAGATAGGTTGTAG  
CTGGCTC-TTTAGAGCATGTGCACGCCTGTTTGGACTTCATTTTCATCCACCTGTGCACC  
TATTGTAGTCTTTGGTTGGGTTAGGGGGAAGTGGTCATTGTGTCAGCATCTGCTGGATGT  
GAGGACTTGCATTGTGAAAGCTTTGCTGTCCTTGATGTGATCATGGAATCTCTTTCTCAC  
TAGAGTCTATGTCACCTATTATACTCTGTGCAATGTCATTGAATGTCTTTACATGGGCTT  
GTATGCCTATGAAAATTGTAATACAACCTTTCAGCAACGGATCTCTTGGCTCTCGCATCGA  
TGAAGGACGCAGCGAAATGCGATAAGTAATGTGAATTGCAGAATTCAGTGAATCATCGAA  
TCTTTGAACGCATCTTGCGCTCCTTGGTATTCCGAGGAGCATGCCTGTTTGAGTGTCAAT  
AAATTCTCAACTCTCTTATAC-TTTTTTGAAAAGAGAGCTTGGACTGTGGAGGCTTGCT  
GGCCACTTTTTGGGGTCAGCTCCTCTGAAATGCATTAGCGGAACCGTTTGCAATCTGCCA  
CAAGTGTGATAAGTTATCTACACTGGCGAGGGGATTGCTCTCTGTAATGTTTCAGCTTCTA



ATTGTCTCTACTTTGTGAGACAACTTTTGAATGCTTGACCTCAAATCAGGTAGGACTACC  
CGCTGAACTTAA

>ABC7-52

TTTCCGTAGGTGAACCTGCGGAAGGATCATTATTGAATTATGTTTCTAGATAGGTTGTAG  
CTGGCTC-TTTAGAGCATGTGCACGCCTGTTTGGACTTCATTTTCATCCACCTGTGCACC  
TATTGTAGTCTTTGGTTGGGTTAGGGGGAAGTGGTCATTGTGTCAGCATCTGCTGGATGT  
GAGGACTTGCATTGTGAAAGCTTTGCTGTCCTTGATGTGATCATGGAATCTCTTTCTCAC  
TAGAGTCTATGTCACTCATTATACTCTGTGCAATGTCATTGAATGTCTTTACATGGGCTT  
GTATGCCTATGAAAATTGTAATAACAACCTTTCAGCAACGGATCTCTTGGCTCTCGCATCGA  
TGAAGGACGCAGCGAAATGCGATAAGTAATGTGAATTGCAGAATTCAGTGAATCATCGAA  
TCTTTGAACGCATCTTGCCTCCTTGGTATTCCGAGGAGCATGCCTGTTTGAGTGTCAAT  
AAATTCTCAACTCTCTTATAC-TTTTTGTAAAAGAGAGCTTGGACTGTGGAGGCTTGCT  
GGCCACTTTTTGGGGTCAGCTCCTCTGAAATGCATTAGCGGAACCGTTTGCAATCTGCCA  
CAAGTGTGATAAGTTATCTAAGTGGCGAGGGGATTGCTCTCTGTAATGTTTCAAGCTTCTA  
ATTGTCTCTACTTTGTGAGACAACTTTTGAATGCTTGACCTCAAATCAGGTAGGACTACC  
CGCTGAACTTAA

>ABC8-9

TTTCCGTAGGTGAACCTGCGGAAGGATCATTATTGAATTATGTTTCTAGATAGGTTGTAG  
CTGGCTC-TTTAGAGCATGTGCACGCCTGTTTGGACTTCATTTTCATCCACCTGTGCACC  
TATTGTAGTCTTTGGTTGGGTTAGGGGGAAGTGGTCATTGTGTCAGCATCTGCTGGATGT  
GAGGACTTGCATTGTGAAAGCTTTGCTGTCCTTGATGTGATCATGGAATCTCTTTCTCAC  
TAGAGTCTATGTCACTCATTATACTCTGTGCAATGTCATTGAATGTCTTTACATGGGCTT  
GTATGCCTATGAAAATTGTAATAACAACCTTTCAGCAACGGATCTCTTGGCTCTCGCATCGA  
TGAAGGACGCAGCGAAATGCGATAAGTAATGTGAATTGCAGAATTCAGTGAATCATCGAA  
TCTTTGAACGCATCTTGCCTCCTTGGTATTCCGAGGAGCATGCCTGTTTGAGTGTCAAT  
AAATTCTCAACTCTCTTATAC-TTTTTGTAAAAGAGAGCTTGGACTGTGGAGGCTTGCT  
GGCCACTTTTTGGGGTCAGCTCCTCTGAAATGCATTAGCGGAACCGTTTGCAATCTGCCA  
CAAGTGTGATAAGTTATCTAAGTGGCGAGGGGATTGCTCTCTGTAATGTTTCAAGCTTCTA  
ATTGTCTCTACTTTGTGAGACAACTTTTGAATGCTTGACCTCAAATCAGGTAGGACTACC  
CGCTGAACTTAA

>ABC8-14

TTTCCGTAGGTGAACCTGCGGAAGGATCATTATTGAATTATGTTTCTAGATAGGTTGTAG  
CTGGCTC-TTTAGAGCATGTGCACGCCTGTTTGGACTTCATTTTCATCCACCTGTGCACC  
TATTGTAGTCTTTGGTTGGGTTAGGGGGAAGTGGTCATTGTGTCAGCATCTGCTGGATGT  
GAGGACTTGCATTGTGAAAGCTTTGCTGTCCTTGATGTGATCATGGAATCTCTTTCTCAC  
TAGAGTCTATGTCACTCATTATACTCTGTGCAATGTCATTGAATGTCTTTACATGGGCTT  
GTATGCCTATGAAAATTGTAATAACAACCTTTCAGCAACGGATCTCTTGGCTCTCGCATCGA  
TGAAGGACGCAGCGAAATGCGATAAGTAATGTGAATTGCAGAATTCAGTGAATCATCGAA  
TCTTTGAACGCATCTTGCCTCCTTGGTATTCCGAGGAGCATGCCTGTTTGAGTGTCAAT  
AAATTCTCAACTCTCTTATAC-TTTTTGTAAAAGAGAGCTTGGACTGTGGAGGCTTGCT  
GGCCACTTTTTGGGGTCAGCTCCTCTGAAATGCATTAGCGGAACCGTTTGCAATCTGCCA  
CAAGTGTGATAAGTTATCTAAGTGGCGAGGGGATTGCTCTCTGTAATGTTTCAAGCTTCTA  
ATTGTCTCTACTTTGTGAGACAACTTTTGAATGCTTGACCTCAAATCAGGTAGGACTACC  
CGCTGAACTTAA

>ABC6-54

TTTCCGTAGGTGAACCTGCGGAAGGATCATTATTGAATTATGTTTCTAGATAGGTTGTAG  
CTGGCTC-TTTAGAGCATGTGCACGCCTGTTTGGACTTCATTTTCATCCACCTGTGCACC  
TATTGTAGTCTTTGGTTGGGTTAGGGGGAAGTGGTCATTGTGTCAGCATCTGCTGGATGT  
GAGGACTTGCATTGTGAAAGCTTTGCTGTCCTTGATGTGATCATGGAATCTCTTTCTCAC  
TAGAGTCTATGTCACTCATTATACTCTGTGCAATGTCATTGAATGTCTTTACATGGGCTT



GTATGCCTATGAAAATTGTAATACAACCTTTTCAGCAACGGATCTCTTGGCTCTCGCATCGA  
TGAAGGACGCAGCGAAATGCGATAAGTAATGTGAATTGCAGAATTCAGTGAATCATCGAA  
TCTTTGAACGCATCTTGCCTCCTTGGTATTCCGAGGAGCATGCCTGTTTGAGTGTCAAT  
AAATTCTCAACTCTCTTATAC-TTTTTTGAAAAGAGAGCTTGGACTGTGGAGGCTTGCT  
GGCCACTTTTTGGGGTCAGCTCCTCTGAAATGCATTAGCGGAACCGTTTGCAATCTGCCA  
CAAGTGTGATAAGTTATCTACACTGGCGAGGGGATTGCTCTCTGTAATGTTTCAGCTTCTA  
ATTGTCTCTACTTTGTGAGACAACCTTTGAATGCTTGACCTCAAATCAGGTAGGACTACC  
CGCTGAACTTAA

>ABC8-56

TTTCCGTAGGTGAACCTGCGGAAGGATCATTATTGAATTATGTTTCTAGATAGGTTGTAG  
CTGGCTC-TTLAGAGCATGTGCACGCCTGTTTGGACTTCATTTTCATCCACCTGTGCACC  
TATTGTAGTCTTTGGTTGGGTTAGGGGGAAGTGGTCATTGTGTCAGCATCTGCTGGATGT  
GAGGACTTGCATTGTGAAAGCTTTGCTGTCCTTGATGTGATCATGGAATCTCTTTCTCAC  
TAGAGTCTATGTCACCTCATTATACTCTGTGCAATGTCATTGAATGTCTTTACATGGGCTT  
GTATGCCTATGAAAATTGTAATACAACCTTTTCAGCAACGGATCTCTTGGCTCTCGCATCGA  
TGAAGGACGCAGCGAAATGCGATAAGTAATGTGAATTGCAGAATTCAGTGAATCATCGAA  
TCTTTGAACGCATCTTGCCTCCTTGGTATTCCGAGGAGCATGCCTGTTTGAGTGTCAAT  
AAATTCTCAACTCTCTTATAC-TTTTTTGAAAAGAGAGCTTGGACTGTGGAGGCTTGCT  
GGCCACTTTTTGGGGTCAGCTCCTCTGAAATGCATTAGCGGAACCGTTTGCAATCTGCCA  
CAAGTGTGATAAGTTATCTACACTGGCGAGGGGATTGCTCTCTGTAATGTTTCAGCTTCTA  
ATTGTCTCTACTTTGTGAGACAACCTTTGAATGCTTGACCTCAAATCAGGTAGGACTACC  
CGCTGAACTTAA

>ABC9-19

TTTCCGTAGGTGAACCTGCGGAAGGATCATTATTGAATTATGTTTCTAGATAGGTTGTAG  
CTGGCTC-TTLAGAGCATGTGCACGCCTGTTTGGACTTCATTTTCATCCACCTGTGCACC  
TATTGTAGTCTTTGGTTGGGTTAGGGGGAAGTGGTCATTGTGTCAGCATCTGCTGGATGT  
GAGGACTTGCATTGTGAAAGCTTTGCTGTCCTTGATGTGATCATGGAATCTCTTTCTCAC  
TAGAGTCTATGTCACCTCATTATACTCTGTGCAATGTCATTGAATGTCTTTACATGGGCTT  
GTATGCCTATGAAAATTGTAATACAACCTTTTCAGCAACGGATCTCTTGGCTCTCGCATCGA  
TGAAGGACGCAGCGAAATGCGATAAGTAATGTGAATTGCAGAATTCAGTGAATCATCGAA  
TCTTTGAACGCATCTTGCCTCCTTGGTATTCCGAGGAGCATGCCTGTTTGAGTGTCAAT  
AAATTCTCAACTCTCTTATAC-TTTTTTGAAAAGAGAGCTTGGACTGTGGAGGCTTGCT  
GGCCACTTTTTGGGGTCAGCTCCTCTGAAATGCATTAGCGGAACCGTTTGCAATCTGCCA  
CAAGTGTGATAAGTTATCTACACTGGCGAGGGGATTGCTCTCTGTAATGTTTCAGCTTCTA  
ATTGTCTCTACTTTGTGAGACAACCTTTGAATGCTTGACCTCAAATCAGGTAGGACTACC  
CGCTGAACTTAA

>ABC9-24

TTTCCGTAGGTGAACCTGCGGAAGGATCATTATTGAATTATGTTTCTAGATAGGTTGTAG  
CTGGCTC-TTLAGAGCATGTGCACGCCTGTTTGGACTTCATTTTCATCCACCTGTGCACC  
TATTGTAGTCTTTGGTTGGGTTAGGGGGAAGTGGTCATTGTGTCAGCATCTGCTGGATGT  
GAGGACTTGCATTGTGAAAGCTTTGCTGTCCTTGATGTGATCATGGAATCTCTTTCTCAC  
TAGAGTCTATGTCACCTCATTATACTCTGTGCAATGTCATTGAATGTCTTTACATGGGCTT  
GTATGCCTATGAAAATTGTAATACAACCTTTTCAGCAACGGATCTCTTGGCTCTCGCATCGA  
TGAAGGACGCAGCGAAATGCGATAAGTAATGTGAATTGCAGAATTCAGTGAATCATCGAA  
TCTTTGAACGCATCTTGCCTCCTTGGTATTCCGAGGAGCATGCCTGTTTGAGTGTCAAT  
AAATTCTCAACTCTCTTATAC-TTTTTTGAAAAGAGAGCTTGGACTGTGGAGGCTTGCT  
GGCCACTTTTTGGGGTCAGCTCCTCTGAAATGCATTAGCGGAACCGTTTGCAATCTGCCA  
CAAGTGTGATAAGTTATCTACACTGGCGAGGGGATTGCTCTCTGTAATGTTTCAGCTTCTA  
ATTGTCTCTACTTTGTGAGACAACCTTTGAATGCTTGACCTCAAATCAGGTAGGACTACC  
CGCTGAACTTAA



>ABC10-26

TTTCCGTAGGTGAACCTGCGGAAGGATCATTATTGAATTATGTTTCTAGATAGGTTGTAG  
CTGGCTC-TTTAGAGCATGTGCACGCCTGTTTGGACTTCATTTTCATCCACCTGTGCACC  
TATTGTAGTCTTTGGTTGGGTTAGGGGGAAGTGGTCATTGTGTCAGCATCTGCTGGATGT  
GAGGACTTGCATTGTGAAAGCTTTGCTGTCCTTGATGTGATCATGGAATCTCTTTCTCAC  
TAGAGTCTATGTCACCTCATTATACTCTGTGCGAATGTCATTGAATGTCTTTACATGGGCTT  
GTATGCCTATGAAAATTGTAATACAACCTTTCAGCAACGGATCTCTTGGCTCTCGCATCGA  
TGAAGGACGCAGCGAAATGCGATAAGTAATGTGAATTGCAGAATTCAGTGAATCATCGAA  
TCTTTGAACGCATCTTGCCTCCTTGGTATTCCGAGGAGCATGCCTGTTTGAGTGTGATT  
AAATTCTCAACTCTCTTATAC-TTTTTGTAAAAGAGAGCTTGGACTGTGGAGGCTTGCT  
GGCCACTTTTTGGGGTCAGCTCCTCTGAAATGCATTAGCGGAACCGTTTGCAATCTGCCA  
CAAGTGTGATAAGTTATCTACACTGGCGAGGGGATTGCTCTCTGTAATGTTTCAGCTTCTA  
ATTGTCTCTACTTTGTGAGACAACTTTTGAATGCTTGACCTCAAATCAGGTAGGACTACC  
CGCTGAACTTAA

>ABC10-28

TTTCCGTAGGTGAACCTGCGGAAGGATCATTATTGAATTATGTTTCTAGATAGGTTGTAG  
CTGGCTC-TTTAGAGCATGTGCACGCCTGTTTGGACTTCATTTTCATCCACCTGTGCACC  
TATTGTAGTCTTTGGTTGGGTTAGGGGGAAGTGGTCATTGTGTCAGCATCTGCTGGATGT  
GAGGACTTGCATTGTGAAAGCTTTGCTGTCCTTGATGTGATCATGGAATCTCTTTCTCAC  
TAGAGTCTATGTCACCTCATTATACTCTGTGCGAATGTCATTGAATGTCTTTACATGGGCTT  
GTATGCCTATGAAAATTGTAATACAACCTTTCAGCAACGGATCTCTTGGCTCTCGCATCGA  
TGAAGGACGCAGCGAAATGCGATAAGTAATGTGAATTGCAGAATTCAGTGAATCATCGAA  
TCTTTGAACGCATCTTGCCTCCTTGGTATTCCGAGGAGCATGCCTGTTTGAGTGTGATT  
AAATTCTCAACTCTCTTATAC-TTTTTGTAAAAGAGAGCTTGGACTGTGGAGGCTTGCT  
GGCCACTTTTTGGGGTCAGCTCCTCTGAAATGCATTAGCGGAACCGTTTGCAATCTGCCA  
CAAGTGTGATAAGTTATCTACACTGGCGAGGGGATTGCTCTCTGTAATGTTTCAGCTTCTA  
ATTGTCTCTACTTTGTGAGACAACTTTTGAATGCTTGACCTCAAATCAGGTAGGACTACC  
CGCTGAACTTAA

>ABC10-41

TTTCCGTAGGTGAACCTGCGGAAGGATCATTATTGAATTATGTTTCTAGATAGGTTGTAG  
CTGGCTC-TTTAGAGCATGTGCACGCCTGTTTGGACTTCATTTTCATCCACCTGTGCACC  
TATTGTAGTCTTTGGTTGGGTTAGGGGGAAGTGGTCATTGTGTCAGCATCTGCTGGATGT  
GAGGACTTGCATTGTGAAAGCTTTGCTGTCCTTGATGTGATCATGGAATCTCTTTCTCAC  
TAGAGTCTATGTCACCTCATTATACTCTGTGCGAATGTCATTGAATGTCTTTACATGGGCTT  
GTATGCCTATGAAAATTGTAATACAACCTTTCAGCAACGGATCTCTTGGCTCTCGCATCGA  
TGAAGGACGCAGCGAAATGCGATAAGTAATGTGAATTGCAGAATTCAGTGAATCATCGAA  
TCTTTGAACGCATCTTGCCTCCTTGGTATTCCGAGGAGCATGCCTGTTTGAGTGTGATT  
AAATTCTCAACTCTCTTATAC-TTTTTGTAAAAGAGAGCTTGGACTGTGGAGGCTTGCT  
GGCCACTTTTTGGGGTCAGCTCCTCTGAAATGCATTAGCGGAACCGTTTGCAATCTGCCA  
CAAGTGTGATAAGTTATCTACACTGGCGAGGGGATTGCTCTCTGTAATGTTTCAGCTTCTA  
ATTGTCTCTACTTTGTGAGACAACTTTTGAATGCTTGACCTCAAATCAGGTAGGACTACC  
CGCTGAACTTAA

>ABC11-7

TTTCCGTAGGTGAACCTGCGGAAGGATCATTATTGAATTATGTTTCTAGATAGGTTGTAG  
CTGGCTC-TTTAGAGCATGTGCACGCCTGTTTGGACTTCATTTTCATCCACCTGTGCACC  
TATTGTAGTCTTTGGTTGGGTTAGGGGGAAGTGGTCATTGTGTCAGCATCTGCTGGATGT  
GAGGACTTGCATTGTGAAAGCTTTGCTGTCCTTGATGTGATCATGGAATCTCTTTCTCAC  
TAGAGTCTATGTCACCTCATTATACTCTGTGCGAATGTCATTGAATGTCTTTACATGGGCTT  
GTATGCCTATGAAAATTGTAATACAACCTTTCAGCAACGGATCTCTTGGCTCTCGCATCGA  
TGAAGGACGCAGCGAAATGCGATAAGTAATGTGAATTGCAGAATTCAGTGAATCATCGAA



TCTTTGAACGCATCTTGCGCTCCTTGGTATTCCGAGGAGCATGCCTGTTTGAGTGTCAATT  
AAATTCTCAACTCTCTTATAC-TTTTTGTAAAAGAGAGCTTGGACTGTGGAGGCTTGCT  
GGCCACTTTTTGGGGTCAGCTCCTCTGAAATGCATTAGCGGAACCGTTTGCAATCTGCCA  
CAAGTGTGATAAGTTATCTACACTGGCGAGGGGATTGCTCTCTGTAATGTTTCAGCTTCTA  
ATTGTCTCTACTTTGTGAGACAACTTTTGAATGCTTGACCTCAAATCAGGTAGGACTACC  
CGCTGAACTTAA

>ABC11-11

TTTCCGTAGGTGAACCTGCGGAAGGATCATTATTGAATTATGTTTCTAGATAGGTTGTAG  
CTGGCTC-TTTAGAGCATGTGCACGCCTGTTTGGACTTCATTTTCATCCACCTGTGCACC  
TATTGTAGTCTTTGGTTGGGTTAGGGGGAAGTGGTCATTGTGTCAGCATCTGCTGGATGT  
GAGGACTTGCAATTGTGAAAGCTTTGCTGTCCTTGATGTGATCATGGAATCTCTTTCTCAC  
TAGAGTCTATGTCACTCATTATACTCTGTGCAATGTCATTGAATGTCTTTACATGGGCTT  
GTATGCCTATGAAAATTGTAATACAACCTTTCAGCAACGGATCTCTTGGCTCTCGCATCGA  
TGAAGGACGCAGCGAAATGCGATAAGTAATGTGAATTGCAGAATTCAGTGAATCATCGAA  
TCTTTGAACGCATCTTGCGCTCCTTGGTATTCCGAGGAGCATGCCTGTTTGAGTGTCAATT  
AAATTCTCAACTCTCTTATAC-TTTTTGTAAAAGAGAGCTTGGACTGTGGAGGCTTGCT  
GGCCACTTTTTGGGGTCAGCTCCTCTGAAATGCATTAGCGGAACCGTTTGCAATCTGCCA  
CAAGTGTGATAAGTTATCTACACTGGCGAGGGGATTGCTCTCTGTAATGTTTCAGCTTCTA  
ATTGTCTCTACTTTGTGAGACAACTTTTGAATGCTTGACCTCAAATCAGGTAGGACTACC  
CGCTGAACTTAA

>ABC11-23

TTTCCGTAGGTGAACCTGCGGAAGGATCATTATTGAATTATGTTTCTAGATAGGTTGTAG  
CTGGCTC-TTTAGAGCATGTGCACGCCTGTTTGGACTTCATTTTCATCCACCTGTGCACC  
TATTGTAGTCTTTGGTTGGGTTAGGGGGAAGTGGTCATTGTGTCAGCATCTGCTGGATGT  
GAGGACTTGCAATTGTGAAAGCTTTGCTGTCCTTGATGTGATCATGGAATCTCTTTCTCAC  
TAGAGTCTATGTCACTCATTATACTCTGTGCAATGTCATTGAATGTCTTTACATGGGCTT  
GTATGCCTATGAAAATTGTAATACAACCTTTCAGCAACGGATCTCTTGGCTCTCGCATCGA  
TGAAGGACGCAGCGAAATGCGATAAGTAATGTGAATTGCAGAATTCAGTGAATCATCGAA  
TCTTTGAACGCATCTTGCGCTCCTTGGTATTCCGAGGAGCATGCCTGTTTGAGTGTCAATT  
AAATTCTCAACTCTCTTATAC-TTTTTGTAAAAGAGAGCTTGGACTGTGGAGGCTTGCT  
GGCCACTTTTTGGGGTCAGCTCCTCTGAAATGCATTAGCGGAACCGTTTGCAATCTGCCA  
CAAGTGTGATAAGTTATCTACACTGGCGAGGGGATTGCTCTCTGTAATGTTTCAGCTTCTA  
ATTGTCTCTACTTTGTGAGACAACTTTTGAATGCTTGACCTCAAATCAGGTAGGACTACC  
CGCTGAACTTAA

>ABC12-4

TTTCCGTAGGTGAACCTGCGGAAGGATCATTATTGAATTATGTTTCTAGATAGGTTGTAG  
CTGGCTC-TTTAGAGCATGTGCACGCCTGTTTGGACTTCATTTTCATCCACCTGTGCACC  
TATTGTAGTCTTTGGTTGGGTTAGGGGGAAGTGGTCATTGTGTCAGCATCTGCTGGATGT  
GAGGACTTGCAATTGTGAAAGCTTTGCTGTCCTTGATGTGATCATGGAATCTCTTTCTCAC  
TAGAGTCTATGTCACTCATTATACTCTGTGCAATGTCATTGAATGTCTTTACATGGGCTT  
GTATGCCTATGAAAATTGTAATACAACCTTTCAGCAACGGATCTCTTGGCTCTCGCATCGA  
TGAAGGACGCAGCGAAATGCGATAAGTAATGTGAATTGCAGAATTCAGTGAATCATCGAA  
TCTTTGAACGCATCTTGCGCTCCTTGGTATTCCGAGGAGCATGCCTGTTTGAGTGTCAATT  
AAATTCTCAACTCTCTTATAC-TTTTTGTAAAAGAGAGCTTGGACTGTGGAGGCTTGCT  
GGCCACTTTTTGGGGTCAGCTCCTCTGAAATGCATTAGCGGAACCGTTTGCAATCTGCCA  
CAAGTGTGATAAGTTATCTACACTGGCGAGGGGATTGCTCTCTGTAATGTTTCAGCTTCTA  
ATTGTCTCTACTTTGTGAGACAACTTTTGAATGCTTGACCTCAAATCAGGTAGGACTACC  
CGCTGAACTTAA

>ABC12-9

TTTCCGTAGGTGAACCTGCGGAAGGATCATTATTGAATTATGTTTCTAGATAGGTTGTAG



CTGGCTC-TTTAGAGCATGTGCACGCCTGTTTGGACTTCATTTTCATCCACCTGTGCACC  
TATTGTAGTCTTTGGTTGGGTTAGGGGGAAGTGGTCATTGTGTCAGCATCTGCTGGATGT  
GAGGACTTGCATTGTGAAAGCTTTGCTGTCCTTGATGTGATCATGGAATCTCTTTCTCAC  
TAGAGTCTATGTCACCTATTATACTCTGTGCAATGTCATTGAATGTCTTTACATGGGCTT  
GTATGCCTATGAAAATTGTAATACAACCTTTCAGCAACGGATCTCTTGGCTCTCGCATCGA  
TGAAGGACGCAGCGAAATGCGATAAGTAATGTGAATTGCAGAATTCAGTGAATCATCGAA  
TCTTTGAACGCATCTTGCCTCCTTGGTATTCCGAGGAGCATGCCTGTTTGAGTGTCAAT  
AAATTCTCAACTCTCTTATAC-TTTTTTGTAAGAGAGCTTGGACTGTGGAGGCTTGCT  
GGCCACTTTTTGGGGTCAGCTCCTCTGAAATGCATTAGCGGAACCGTTTGCAATCTGCCA  
CAAGTGTGATAAGTTATCTACACTGGCGAGGGGATTGCTCTCTGTAATGTTGAGCTTCTA  
ATTGTCTCTACTTTGTGAGACAACCTTTGAATGCTTGACCTCAAATCAGGTAGGACTACC  
CGCTGAACTTAA

>ABC12-18

TTTCCGTAGGTGAACCTGCGGAAGGATCATTATTGAATTATGTTTCTAGATAGGTTGTAG  
CTGGCTC-TTTAGAGCATGTGCACGCCTGTTTGGACTTCATTTTCATCCACCTGTGCACC  
TATTGTAGTCTTTGGTTGGGTTAGGGGGAAGTGGTCATTGTGTCAGCATCTGCTGGATGT  
GAGGACTTGCATTGTGAAAGCTTTGCTGTCCTTGATGTGATCATGGAATCTCTTTCTCAC  
TAGAGTCTATGTCACCTATTATACTCTGTGCAATGTCATTGAATGTCTTTACATGGGCTT  
GTATGCCTATGAAAATTGTAATACAACCTTTCAGCAACGGATCTCTTGGCTCTCGCATCGA  
TGAAGGACGCAGCGAAATGCGATAAGTAATGTGAATTGCAGAATTCAGTGAATCATCGAA  
TCTTTGAACGCATCTTGCCTCCTTGGTATTCCGAGGAGCATGCCTGTTTGAGTGTCAAT  
AAATTCTCAACTCTCTTATAC-TTTTTTGTAAGAGAGCTTGGACTGTGGAGGCTTGCT  
GGCCACTTTTTGGGGTCAGCTCCTCTGAAATGCATTAGCGGAACCGTTTGCAATCTGCCA  
CAAGTGTGATAAGTTATCTACACTGGCGAGGGGATTGCTCTCTGTAATGTTGAGCTTCTA  
ATTGTCTCTACTTTGTGAGACAACCTTTGAATGCTTGACCTCAAATCAGGTAGGACTACC  
CGCTGAACTTAA

>ABC12-51

TTTCCGTAGGTGAACCTGCGGAAGGATCATTATTGAATTATGTTTCTAGATAGGTTGTAG  
CTGGCTC-TTTAGAGCATGTGCACGCCTGTTTGGACTTCATTTTCATCCACCTGTGCACC  
TATTGTAGTCTTTGGTTGGGTTAGGGGGAAGTGGTCATTGTGTCAGCATCTGCTGGATGT  
GAGGACTTGCATTGTGAAAGCTTTGCTGTCCTTGATGTGATCATGGAATCTCTTTCTCAC  
TAGAGTCTATGTCACCTATTATACTCTGTGCAATGTCATTGAATGTCTTTACATGGGCTT  
GTATGCCTATGAAAATTGTAATACAACCTTTCAGCAACGGATCTCTTGGCTCTCGCATCGA  
TGAAGGACGCAGCGAAATGCGATAAGTAATGTGAATTGCAGAATTCAGTGAATCATCGAA  
TCTTTGAACGCATCTTGCCTCCTTGGTATTCCGAGGAGCATGCCTGTTTGAGTGTCAAT  
AAATTCTCAACTCTCTTATAC-TTTTTTGTAAGAGAGCTTGGACTGTGGAGGCTTGCT  
GGCCACTTTTTGGGGTCAGCTCCTCTGAAATGCATTAGCGGAACCGTTTGCAATCTGCCA  
CAAGTGTGATAAGTTATCTACACTGGCGAGGGGATTGCTCTCTGTAATGTTGAGCTTCTA  
ATTGTCTCTACTTTGTGAGACAACCTTTGAATGCTTGACCTCAAATCAGGTAGGACTACC  
CGCTGAACTTAA

>ABC7-39

TTTCCGTAGGTGAACCTGCGGAAGGATCATTATTGAATTATGTTTCTAGATAGGTTGTAG  
CTGGCTC-TTTAGAGCATGTGCACGCCTGTTTGGACTTCATTTTCATCCACCTGTGCACC  
TATTGTAGTCTTTGGTTGGGTTAGGGGGAAGTGGTCATTGTGTCAGCATCTGCTGGATGT  
GAGGACTTGCATTGTGAAAGCTTTGCTGTCCTTGATGTGATCATGGAATCTCTTTCTCAC  
TAGAGTCTATGTCACCTATTATACTCTGTGCAATGTCATTGAATGTCTTTACATGGGCTT  
GTATGCCTATGAAAATTGTAATACAACCTTTCAGCAACGGATCTCTTGGCTCTCGCATCGA  
TGAAGGACGCAGCGAAATGCGATAAGTAATGTGAATTGCAGAATTCAGTGAATCATCGAA  
TCTTTGAACGCATCTTGCCTCCTTGGTATTCCGAGGAGCATGCCTGTTTGAGTGTCAAT  
AAATTCTCAACTCTCTTATAC-TTTTTTGTAAGAGAGCTTGGACTGTGGAGGCTTGCT



GGCCACTTTTTGGGGTCAGCTCCTCTGAAATGCATTAGCGGAACCGTTTGCAATCTGCCA  
CAAGTGTGATAAGTTATCTACACTGGCGAGGGGATTGCTCTCTGTAATGTTGAGCTTCTA  
ATTGTCTCTACTTTGTGAGACAACTTTGAATGCTTGACCTCAAATCAGGTAGGACTACC  
CGCTGAACTTAA

>ABC5-86

TTTCCGTAGGTGAACCTGCGGAAGGATCATTATTGAATTATGTTTCTAGATAGGTTGTAG  
CTGGCTC-TTTAGAGCATGTGCACGCCTGTTTGGACTTCATTTTCATCCACCTGTGCACC  
TATTGTAGTCTTTGGTTGGGTTAGGGGGAAGTGGTCATTGTGTCAGCATCTGCTGGATGT  
GAGGACTTGCATTGTGAAAGCTTTGCTGTCCTTGATGTGATCATGGAATCTCTTTCTCAC  
TAGAGTCTATGTCACTCATTATACTCTGTGCAATGTCATTGAATGTCTTTACATGGGCTT  
GTATGCCTATGAAAATTGTAATACTTTTTCAGCAACGGATCTCTTGGCTCTCGCATCGA  
TGAAGGACGCAGCGAAATGCGATAAGTAATGTGAATTGCAGAATTCAGTGAATCATCGAA  
TCTTTGAACGCATCTTGCGCTCCTTGGTATTCCGAGGAGCATGCCTGTTTGAGTGTGATT  
AAATTCTCAACTCTCTTATAC-TTTTTGTAAAAGAGAGCTTGGACTGTGGAGGCTTGCT  
GGCCACTTTTTGGGGTCAGCTCCTCTGAAATGCATTAGCGGAACCGTTTGCAATCTGCCA  
CAAGTGTGATAAGTTATCTACACTGGCGAGGGGATTGCTCTCTGTAATGTTGAGCTTCTA  
ATTGTCTCTACTTTGTGAGACAACTTTGAATGCTTGACCTCAAATCAGGTAGGACTACC  
CGCTGAACTTAA

>ABC2-49

TTTCCGTAGGTGAACCTGCGGAAGGATCATTATTGAATTATGTTTCTAGATAGGTTGTAG  
CTGGCTC-TTTAGAGCATGTGCACGCCTGTTTGGACTTCATTTTCATCCACCTGTGCACC  
TATTGTAGTCTTTGGTTGGGTTAGGGGGAAGTGGTCATTGTGTCAGCATCTGCTGGATGT  
GAGGACTTGCATTGTGAAAGCTTTGCTGTCCTTGATGTGATCATGGAATCTCTTTCTCAC  
TAGAGTCTATGTCACTCATTATACTCTGTGCAATGTCATTGAATGTCTTTACATGGGCTT  
GTATGCCTATGAAAATTGTAATACTTTTTCAGCAACGGATCTCTTGGCTCTCGCATCGA  
TGAAGGACGCAGCGAAATGCGATAAGTAATGTGAATTGCAGAATTCAGTGAATCATCGAA  
TCTTTGAACGCATCTTGCGCTCCTTGGTATTCCGAGGAGCATGCCTGTTTGAGTGTGATT  
AAATTCTCAACTCTCTTATAC-TTTTTGTAAAAGAGAGCTTGGACTGTGGAGGCTTGCT  
GGCCACTTTTTGGGGTCAGCTCCTCTGAAATGCATTAGCGGAACCGTTTGCAATCTGCCA  
CAAGTGTGATAAGTTATCTACACTGGCGAGGGGATTGCTCTCTGTAATGTTGAGCTTCTA  
ATTGTCTCTACTTTGTGAGACAACTTTGAATGCTTGACCTCAAATCAGGTAGGACTACC  
CGCTGAACTTAA

>ABC1-13

TTTCCGTAGGTGAACCTGCGGAAGGATCATTATTGAATTATGTTTCTAGATAGGTTGTAG  
CTGGCTC-TTTAGAGCATGTGCACGCCTGTTTGGACTTCATTTTCATCCACCTGTGCACC  
TATTGTAGTCTTTGGTTGGGTTAGGGGGAAGTGGTCATTGTGTCAGCATCTGCTGGATGT  
GAGGACTTGCATTGTGAAAGCTTTGCTGTCCTTGATGTGATCATGGAATCTCTTTCTCAC  
TAGAGTCTATGTCACTCATTATACTCTGTGCAATGTCATTGAATGTCTTTACATGGGCTT  
GTATGCCTATGAAAATTGTAATACTTTTTCAGCAACGGATCTCTTGGCTCTCGCATCGA  
TGAAGGACGCAGCGAAATGCGATAAGTAATGTGAATTGCAGAATTCAGTGAATCATCGAA  
TCTTTGAACGCATCTTGCGCTCCTTGGTATTCCGAGGAGCATGCCTGTTTGAGTGTGATT  
AAATTCTCAACTCTCTTATAC-TTTTTGTAAAAGAGAGCTTGGACTGTGGAGGCTTGCT  
GGCCACTTTTTGGGGTCAGCTCCTCTGAAATGCATTAGCGGAACCGTTTGCAATCTGCCA  
CAAGTGTGATAAGTTATCTACACTGGCGAGGGGATTGCTCTCTGTAATGTTGAGCTTCTA  
ATTGTCTCTACTTTGTGAGACAACTTTGAATGCTTGACCTCAAATCAGGTAGGACTACC  
CGCTGAACTTAA

>ABC1-8

TTTCCGTAGGTGAACCTGCGGAAGGATCATTATTGAATTATGTTTCTAGATAGGTTGTAG  
CTGGCTC-TTTAGAGCATGTGCACGCCTGTTTGGACTTCATTTTCATCCACCTGTGCACC  
TATTGTAGTCTTTGGTTGGGTTAGGGGGAAGTGGTCATTGTGTCAGCATCTGCTGGATGT



GAGGACTTGCATTGTGAAAGCTTTGCTGTCCTTGATGTGATCATGGAATCTCTTTCTCAC  
TAGAGTCTATGTCACCTATTATACTCTGTGCAATGTCATTGAATGTCTTTACATGGGCTT  
GTATGCCTATGAAAATTGTAATACAACCTTTCAGCAACGGATCTCTTGGCTCTCGCATCGA  
TGAAGGACGCAGCGAAATGCGATAAGTAATGTGAATTGCAGAATTCAGTGAATCATCGAA  
TCTTTGAACGCATCTTGCGCTCCTTGGTATTCCGAGGAGCATGCCTGTTTGAGTGTCAAT  
AAATTCTCAACTCTCTTATAC-TTTTTGTAAAAGAGAGCTTGGACTGTGGAGGCTTGCT  
GGCCACTTTTTGGGGTCAGCTCCTCTGAAATGCATTAGCGGAACCGTTTGCAATCTGCCA  
CAAGTGTGATAAGTTATCTACACTGGCGAGGGGATTGCTCTCTGTAATGTTTCAGCTTCTA  
ATTGTCTCTACTTTGTGAGACAACTTTTGAATGCTTGACCTCAAATCAGGTAGGACTACC  
CGCTGAACTTAA

>ABC1-35

TTTCCGTAGGTGAACCTGCGGAAGGATCATTATTGAATTATGTTTCTAGATAGGTTGTAG  
CTGGCTC-TTLAGAGCATGTGCACGCCTGTTTGGACTTCATTTTCATCCACCTGTGCACC  
TATTGTAGTCTTTGGTTGGGTTAGGGGGAAGTGGTCATTGTGTCAGCATCTGCTGGATGT  
GAGGACTTGCATTGTGAAAGCTTTGCTGTCCTTGATGTGATCATGGAATCTCTTTCTCAC  
TAGAGTCTATGTCACCTATTATACTCTGTGCAATGTCATTGAATGTCTTTACATGGGCTT  
GTATGCCTATGAAAATTGTAATACAACCTTTCAGCAACGGATCTCTTGGCTCTCGCATCGA  
TGAAGGACGCAGCGAAATGCGATAAGTAATGTGAATTGCAGAATTCAGTGAATCATCGAA  
TCTTTGAACGCATCTTGCGCTCCTTGGTATTCCGAGGAGCATGCCTGTTTGAGTGTCAAT  
AAATTCTCAACTCTCTTATAC-TTTTTGTAAAAGAGAGCTTGGACTGTGGAGGCTTGCT  
GGCCACTTTTTGGGGTCAGCTCCTCTGAAATGCATTAGCGGAACCGTTTGCAATCTGCCA  
CAAGTGTGATAAGTTATCTACACTGGCGAGGGGATTGCTCTCTGTAATGTTTCAGCTTCTA  
ATTGTCTCTACTTTGTGAGACAACTTTTGAATGCTTGACCTCAAATCAGGTAGGACTACC  
CGCTGAACTTAA

>ABC3-5

TTTCCGTAGGTGAACCTGCGGAAGGATCATTATTGAATTATGTTTCTAGATAGGTTGTAG  
CTGGCTC-TTLAGAGCATGTGCACGCCTGTTTGGACTTCATTTTCATCCACCTGTGCACC  
TATTGTAGTCTTTGGTTGGGTTAGGAGGAAGTGGTCATTGTGTCAGCATCTGCTGGATGT  
GAGGACTTGCATTGTGAAAGCTTTGCTGTCCTTGATGTGATCATGGAATCTCTTTCTCAC  
TAGAGTCTATGTCACCTATTATACTCTGTGCAATGTCATTGAATGTCTTTACATGGGCTT  
GTATGCCTATGAAAATTGTAATACAACCTTTCAGCAACGGATCTCTTGGCTCTCGCATCGA  
TGAAGGACGCAGCGAAATGCGATAAGTAATGTGAATTGCAGAATTCAGTGAATCATCGAA  
TCTTTGAACGCATCTTGCGCTCCTTGGTATTCCGAGGAGCATGCCTGTTTGAGTGTCAAT  
AAATTCTCAACTCTCTTATAC-TTTTTGTAAAAGAGAGCTTGGACTGTGGAGGCTTGCT  
GGCCACTTTTTGGGGTCAGCTCCTCTGAAATGCATTAGCGGAACCGTTTGCAATCTGCCA  
CAAGTGTGATAAGTTATCTACACTGGCGAGGGGATTGCTCTCTGTAATGTTTCAGCTTCTA  
ATTGTCTCTACTTTGTGAGACAACTTTTGAATGCTTGACCTCAAATCAGGTAGGACTACC  
CGCTGAACTTAA

>ABC5-68

TTTCCGTAGGTGAACCTGCGGAAGGATCATTATTGAATTATGTTTCTAGATAGGTTGTAG  
CTGGCTC-TTLAGAGCATGTGCACGCCTGTTTGGACTTCATTTTCATCCACCTGTGCACC  
TATTGTAGTCTTTGGTTGGGTTAGGAGGAAGTGGTCATTGTGTCAGCATCTGCTGGATGT  
GAGGACTTGCATTGTGAAAGCTTTGCTGTCCTTGATGTGATCATGGAATCTCTTTCTCAC  
TAGAGTCTATGTCACCTATTATACTCTGTGCAATGTCATTGAATGTCTTTACATGGGCTT  
GTATGCCTATGAAAATTGTAATACAACCTTTCAGCAACGGATCTCTTGGCTCTCGCATCGA  
TGAAGGACGCAGCGAAATGCGATAAGTAATGTGAATTGCAGAATTCAGTGAATCATCGAA  
TCTTTGAACGCATCTTGCGCTCCTTGGTATTCCGAGGAGCATGCCTGTTTGAGTGTCAAT  
AAATTCTCAACTCTCTTATAC-TTTTTGTAAAAGAGAGCTTGGACTGTGGAGGCTTGCT  
GGCCACTTTTTGGGGTCAGCTCCTCTGAAATGCATTAGCGGAACCGTTTGCAATCTGCCA  
CAAGTGTGATAAGTTATCTACACTGGCGAGGGGATTGCTCTCTGTAATGTTTCAGCTTCTA



ATTGTCTCTACTTTGTGAGACAACTTTTGAATGCTTGACCTCAAATCAGGTAGGACTACC  
CGCTGAACTTAA

>ABC7-40

TTTCCGTAGGTGAACCTGCGGAAGGATCATTATTGAATTATGTTTCTAGATAGGTTGTAG  
CTGGCTC-TTTAGAGCATGTGCACGCCTGTTTGGACTTCATTTTCATCCACCTGTGCACC  
TATTGTAGTCTTTGGTTGGGTTAGGAGGAAGTGGTCATTGTGTCAGCATCTGCTGGATGT  
GAGGACTTGCATTGTGAAAGCTTTGCTGTCCTTGATGTGATCATGGAATCTCTTTCTCAC  
TAGAGTCTATGTCACTCATTATACTCTGTGCAATGTCATTGAATGTCTTTACATGGGCTT  
GTATGCCTATGAAAATTGTAATAACAACCTTTCAGCAACGGATCTCTTGGCTCTCGCATCGA  
TGAAGGACGCAGCGAAATGCGATAAGTAATGTGAATTGCAGAATTCAGTGAATCATCGAA  
TCTTTGAACGCATCTTGCCTCCTTGGTATTCCGAGGAGCATGCCTGTTTGAGTGTCAAT  
AAATTCTCAACTCTCTTATAC-TTTTTGTAAAAGAGAGCTTGGACTGTGGAGGCTTGCT  
GGCCACTTTTTGGGGTCAGCTCCTCTGAAATGCATTAGCGGAACCGTTTGCAATCTGCCA  
CAAGTGTGATAAGTTATCTAAGTGGCGAGGGGATTGCTCTCTGTAATGTTTCAAGCTTCTA  
ATTGTCTCTACTTTGTGAGACAACTTTTGAATGCTTGACCTCAAATCAGGTAGGACTACC  
CGCTGAACTTAA

>ABC8-53

TTTCCGTAGGTGAACCTGCGGAAGGATCATTATTGAATTATGTTTCTAGATAGGTTGTAG  
CTGGCTC-TTTAGAGCATGTGCACGCCTGTTTGGACTTCATTTTCATCCACCTGTGCACC  
TATTGTAGTCTTTGGTTGGGTTAGGAGGAAGTGGTCATTGTGTCAGCATCTGCTGGATGT  
GAGGACTTGCATTGTGAAAGCTTTGCTGTCCTTGATGTGATCATGGAATCTCTTTCTCAC  
TAGAGTCTATGTCACTCATTATACTCTGTGCAATGTCATTGAATGTCTTTACATGGGCTT  
GTATGCCTATGAAAATTGTAATAACAACCTTTCAGCAACGGATCTCTTGGCTCTCGCATCGA  
TGAAGGACGCAGCGAAATGCGATAAGTAATGTGAATTGCAGAATTCAGTGAATCATCGAA  
TCTTTGAACGCATCTTGCCTCCTTGGTATTCCGAGGAGCATGCCTGTTTGAGTGTCAAT  
AAATTCTCAACTCTCTTATAC-TTTTTGTAAAAGAGAGCTTGGACTGTGGAGGCTTGCT  
GGCCACTTTTTGGGGTCAGCTCCTCTGAAATGCATTAGCGGAACCGTTTGCAATCTGCCA  
CAAGTGTGATAAGTTATCTAAGTGGCGAGGGGATTGCTCTCTGTAATGTTTCAAGCTTCTA  
ATTGTCTCTACTTTGTGAGACAACTTTTGAATGCTTGACCTCAAATCAGGTAGGACTACC  
CGCTGAACTTAA

>ABC7-24

TTTCCGTAGGTGAACCTGCGGAAGGATCATTATTGAATTATGTTTCTAGATAGGTTGTAG  
CTGGCTC-TTTAGAGCATGTGCACGCCTGTTTGGACTTCATTTTCATCCACCTGTGCACC  
TATTGTAGTCTTTGGTTGGGTTAGGGGGAAGTGGTCATTGTGTCAGCATCTGCTGGATGT  
GAGGACTTGCATTGTGAAAGCTTTGCTGTCCTTGATGTGATCATGGAATCTTTTTCTCAC  
TAGAGTCTATGTCACTCATTATACTCTGTGCAATGTCATTGAATGTCTTTACATGGGCTT  
GTATGCCTATGAAAATTGTAATAACAACCTTTCAGCAACGGATCTCTTGGCTCTCGCATCGA  
TGAAGGACGCAGCGAAATGCGATAAGTAATGTGAATTGCAGAATTCAGTGAATCATCGAA  
TCTTTGAACGCATCTTGCCTCCTTGGTATTCCGAGGAGCATGCCTGTTTGAGTGTCAAT  
AAATTCTCAACTCTCTTATAC-TTTTTGTAAAAGAGAGCTTGGACTGTGGAGGCTTGCT  
GGCCACTTTTTGGGGTCAGCTCCTCTGAAATGCATTAGCGGAACCGTTTGCAATCTGCCA  
CAAGTGTGATAAGTTATCTAAGTGGCGAGGGGATTGCTCTCTGTAATGTTTCAAGCTTCTA  
ATTGTCTCTACTTTGTGAGACAACTTTTGAATGCTTGACCTCAAATCAGGTAGGACTACC  
CGCTGAACTTAA

>ABC12-38

TTTCCGTAGGTGAACCTGCGGAAGGATCATTATTGAATTATGTTTCTAGATAGGTTGTAG  
CTGGCTC-TTTAGAGCATGTGCACGCCTGTTTGGACTTCATTTTCATCCACCTGTGCACC  
TATTGTAGTCTTTGGTTGGGTTAGGGGGAAGTGGTCATTGTGTCAACATCTGCTGGATGT  
GAGGACTTGCATTGTGAAAGCTTTGCTGTCCTTGATGTGATCATGGAATCTCTTTCTCAC  
TAGAGTCTATGTCACTCATTATACTCTGTGCAATGTCATTGAATGTCTTTACATGGGCTT



GTATGCCTATGAAAATTGTAATACAACCTTTTCAGCAACGGATCTCTTGGCTCTCGCATCGA  
TGAAGGACGCAGCGAAATGCGATAAGTAATGTGAATTGCAGAATTCAGTGAATCATCGAA  
TCTTTGAACGCATCTTGCCTCCTTGGTATTCCGAGGAGCATGCCTGTTTGAGTGTCAAT  
AAATTCTCAACTCTCTTATAC-TTTTTTGAAAAGAGAGCTTGGACTGTGGAGGCTTGCT  
GGCCACTTTTTGGGGTCAGCTCCTCTGAAATGCATTAGCGGAACCGTTTGCAATCTGCCA  
CAAGTGTGATAAGTTATCTACACTGGCGAGGGGATTGCTCTCTGTAATGTTTCAGCTTCTA  
ATTGTCTCTACTTTGTGAGACAACCTTTGAATGCTTGACCTCAAATCAGGTAGGACTACC  
CGCTGAACTTAA

>ABC6-12

TTTCCGTAGGTGAACCTGCGGAAGGATCATTATTGAATTATGTTTCTAGATAGGTTGTAG  
CTGGCTC-TTLAGAGCATGTGCACGCCTGTTTGGACTTCATTTTCATCCACCTGTGCACC  
TATTGTAGTCTTTGGTTGGGTTAGGAGGAAGTGGTCATTGTGTCAGCATCTGCTGGATGT  
GAGGACTTGCATTGTGAAAGCTTTGCTGTCCTTGATGTGATCATGGAATCTCTTTCTCAC  
TAGAGTCTATGTCACCTCATTATACTCTGTGCGAATGTCATTGAATGTCTTTACATGGGCTT  
ATATGCCTATGAAAATTGTAATACAACCTTTTCAGCAACGGATCTCTTGGCTCTCGCATCGA  
TGAAGGACGCAGCGAAATGCGATAAGTAATGTGAATTGCAGAATTCAGTGAATCATCGAA  
TCTTTGAACGCATCTTGCCTCCTTGGTATTCCGAGGAGCATGCCTGTTTGAGTGTCAAT  
AAATTCTCAACTCTCTTATAC-TTTTTTGAAAAGAGAGCTTGGACTGTGGAGGCTTGCT  
GGCCACTTTTTGGGGTCAGCTCCTCTGAAATGCATTAGCGGAACCGTTTGCAATCTGCCA  
CAAGTGTGATAAGTTATCTACACTGGCGAGGGGATTGCTCTCTGTAATGTTTCAGCTTCTA  
ATTGTCTCTACTTTGTGAGACAACCTTTGAATGCTTGACCTCAAATCAGGTAGGACTACC  
CGCTGAACTTAA

>ABC3-49

TTTCCGTAGGTGAACCTGCGGAAGGATCATTATTGAATTATGTTTCTAGATAGGTTGTAG  
CTGGCTC-TTLAGAGCATGTGCACGCCTGTTTGGACTTCATTTTCATCCACCTGTGCACC  
TATTGTAGTCTTTGGTTGGGTTAGGAGGAAGTGGTCATTGTGTCAGCATCTGCTGGATGT  
GAGGACTTGCATTGTGAAAGCTTTGCTGTCCTTGATGTGATCATGGAATCTCTTTCTCAC  
TAGAGTCTATGTCACCTCATTATACTCTGTGCGAATGTCATTGAATGTCTTTACATGGGCTT  
ATATGCCTATGAAAATTGTAATACAACCTTTTCAGCAACGGATCTCTTGGCTCTCGCATCGA  
TGAAGAACGCAGCGAAATGCGATAAGTAATGTGAATTGCAGAATTCAGTGAATCATCGAA  
TCTTTGAACGCATCTTGCCTCCTTGGTATTCCGAGGAGCATGCCTGTTTGAGTGTCAAT  
AAATTCTCAACTCTCTTATAC-TTTTTTGAAAAGAGAGCTTGGACTGTGGAGGCTTGCT  
GGCCACTTTTTGGGGTCAGCTCCTCTGAAATGCATTAGCGGAACCGTTTGCAATCTGCCA  
CAAGTGTGATAAGTTATCTACACTGGCGAGGGGATTGCTCTCTGTAATGTTTCAGCTTCTA  
ATTGTCTCTACTTTGTGAGACAACCTTTGAATGCTTGACCTCAAATCAGGTAGGACTACC  
CGCTGAACTTAA

>ABC4-5

TTTCCGTAGGTGAACCTGCGGAAGGATCATTATTGAATTATGTTTCTAGATAGGTTGTAG  
CTGGCTC-TTLAGAGCATGTGCACGCCTGTTTGGACTTCATTTTCATCCACCTGTGCACC  
TATTGTAGTCTTTGGTTGGGTTAGGAGGAAGTGGTCATTGTGTCAGCATCTGCTGGATGT  
GAGGACTTGCATTGTGAAAGCTTTGCTGTCCTTGATGTGATCATGGAATCTCTTTCTCAC  
TAGAGTCTATGTCACCTCATTATACTCTGTGCGAATGTCATTGAATGTCTTTACATGGGCTT  
ATATGCCTATGAAAATTGTAATACAACCTTTTCAGCAACGGATCTCTTGGCTCTCGCATCGA  
TGAAGAACGCAGCGAAATGCGATAAGTAATGTGAATTGCAGAATTCAGTGAATCATCGAA  
TCTTTGAACGCATCTTGCCTCCTTGGTATTCCGAGGAGCATGCCTGTTTGAGTGTCAAT  
AAATTCTCAACTCTCTTATAC-TTTTTTGAAAAGAGAGCTTGGACTGTGGAGGCTTGCT  
GGCCACTTTTTGGGGTCAGCTCCTCTGAAATGCATTAGCGGAACCGTTTGCAATCTGCCA  
CAAGTGTGATAAGTTATCTACACTGGCGAGGGGATTGCTCTCTGTAATGTTTCAGCTTCTA  
ATTGTCTCTACTTTGTGAGACAACCTTTGAATGCTTGACCTCAAATCAGGTAGGACTACC  
CGCTGAACTTAA



>ABC8-24

TTTCCGTAGGTGAACCTGCGGAAGGATCATTATTGAATTATGTTTCTAGATAGGTTGTAG  
CTGGCTC-TTTAGAGCATGTGCACGCCTGTTTGGACTTCATTTTCATCCACCTGTGCACC  
TATTGTAGTCTTTGGTTGGGTTAGGAGGAAGTGGTCATTGTGTCAGCATCTGCTGGATGT  
GAGGACTTGCATTGTGAAAGCTTTGCTGTCCTTGATGTGATCATGGAATCTCTTTCTCAC  
TAGAGTCTATGTCACCTCATTATACTCTGTGCGAATGTCATTGAATGTCTTTACATGGGCTT  
ATATGCCTATGAAAATTGTAATACAACCTTTCAGCAACGGATCTCTTGGCTCTCGCATCGA  
TGAAGAACGCAGCGAAATGCGATAAGTAATGTGAATTGCAGAATTCAGTGAATCATCGAA  
TCTTTGAACGCATCTTGCGCTCCTTGGTATTCCGAGGAGCATGCCTGTTTGAGTGTGATT  
AAATTCTCAACTCTCTTATAC-TTTTTGTAAAAGAGAGCTTGGACTGTGGAGGCTTGCT  
GGCCACTTTTTGGGGTCAGCTCCTCTGAAATGCATTAGCGGAACCGTTTGCAATCTGCCA  
CAAGTGTGATAAGTTATCTACACTGGCGAGGGGATTGCTCTCTGTAATGTTTCAGCTTCTA  
ATTGTCTCTACTTTGTGAGACAACTTTTGAATGCTTGACCTCAAATCAGGTAGGACTACC  
CGCTGAACTTAA

>ABC9-15

TTTCCGTAGGTGAACCTGCGGAAGGATCATTATTGAATTATGTTTCTAGATAGGTTGTAG  
CTGGCTC-TTTAGAGCATGTGCACGCCTGTTTGGACTTCATTTTCATCCACCTGTGCACC  
TATTGTAGTCTTTGGTTGGGTTAGGAGGAAGTGGTCATTGTGTCAGCATCTGCTGGATGT  
GAGGACTTGCATTGTGAAAGCTTTGCTGTCCTTGATGTGATCATGGAATCTCTTTCTCAC  
TAGAGTCTATGTCACCTCATTATACTCTGTGCGAATGTCATTGAATGTCTTTACATGGGCTT  
ATATGCCTATGAAAATTGTAATACAACCTTTCAGCAACGGATCTCTTGGCTCTCGCATCGA  
TGAAGAACGCAGCGAAATGCGATAAGTAATGTGAATTGCAGAATTCAGTGAATCATCGAA  
TCTTTGAACGCATCTTGCGCTCCTTGGTATTCCGAGGAGCATGCCTGTTTGAGTGTGATT  
AAATTCTCAACTCTCTTATAC-TTTTTGTAAAAGAGAGCTTGGACTGTGGAGGCTTGCT  
GGCCACTTTTTGGGGTCAGCTCCTCTGAAATGCATTAGCGGAACCGTTTGCAATCTGCCA  
CAAGTGTGATAAGTTATCTACACTGGCGAGGGGATTGCTCTCTGTAATGTTTCAGCTTCTA  
ATTGTCTCTACTTTGTGAGACAACTTTTGAATGCTTGACCTCAAATCAGGTAGGACTACC  
CGCTGAACTTAA

>ABC10-24

TTTCCGTAGGTGAACCTGCGGAAGGATCATTATTGAATTATGTTTCTAGATAGGTTGTAG  
CTGGCTC-TTTAGAGCATGTGCACGCCTGTTTGGACTTCATTTTCATCCACCTGTGCACC  
TATTGTAGTCTTTGGTTGGGTTAGGAGGAAGTGGTCATTGTGTCAGCATCTGCTGGATGT  
GAGGACTTGCATTGTGAAAGCTTTGCTGTCCTTGATGTGATCATGGAATCTCTTTCTCAC  
TAGAGTCTATGTCACCTCATTATACTCTGTGCGAATGTCATTGAATGTCTTTACATGGGCTT  
ATATGCCTATGAAAATTGTAATACAACCTTTCAGCAACGGATCTCTTGGCTCTCGCATCGA  
TGAAGAACGCAGCGAAATGCGATAAGTAATGTGAATTGCAGAATTCAGTGAATCATCGAA  
TCTTTGAACGCATCTTGCGCTCCTTGGTATTCCGAGGAGCATGCCTGTTTGAGTGTGATT  
AAATTCTCAACTCTCTTATAC-TTTTTGTAAAAGAGAGCTTGGACTGTGGAGGCTTGCT  
GGCCACTTTTTGGGGTCAGCTCCTCTGAAATGCATTAGCGGAACCGTTTGCAATCTGCCA  
CAAGTGTGATAAGTTATCTACACTGGCGAGGGGATTGCTCTCTGTAATGTTTCAGCTTCTA  
ATTGTCTCTACTTTGTGAGACAACTTTTGAATGCTTGACCTCAAATCAGGTAGGACTACC  
CGCTGAACTTAA

>ABC11-55

TTTCCGTAGGTGAACCTGCGGAAGGATCATTATTGAATTATGTTTCTAGATAGGTTGTAG  
CTGGCTC-TTTAGAGCATGTGCACGCCTGTTTGGACTTCATTTTCATCCACCTGTGCACC  
TATTGTAGTCTTTGGTTGGGTTAGGAGGAAGTGGTCATTGTGTCAGCATCTGCTGGATGT  
GAGGACTTGCATTGTGAAAGCTTTGCTGTCCTTGATGTGATCATGGAATCTCTTTCTCAC  
TAGAGTCTATGTCACCTCATTATACTCTGTGCGAATGTCATTGAATGTCTTTACATGGGCTT  
ATATGCCTATGAAAATTGTAATACAACCTTTCAGCAACGGATCTCTTGGCTCTCGCATCGA  
TGAAGAACGCAGCGAAATGCGATAAGTAATGTGAATTGCAGAATTCAGTGAATCATCGAA



TCTTTGAACGCATCTTGCGCTCCTTGGTATTCCGAGGAGCATGCCTGTTTGAGTGTCAATT  
AAATTCTCAACTCTCTTATAC-TTTTTGTAAAAGAGAGCTTGGACTGTGGAGGCTTGCT  
GGCCACTTTTTGGGGTCAGCTCCTCTGAAATGCATTAGCGGAACCGTTTGCAATCTGCCA  
CAAGTGTGATAAGTTATCTACACTGGCGAGGGGATTGCTCTCTGTAATGTTTCAGCTTCTA  
ATTGTCTCTACTTTGTGAGACAACTTTTGAATGCTTGACCTCAAATCAGGTAGGACTACC  
CGCTGAACTTAA

>ABC12-31

TTTCCGTAGGTGAACCTGCGGAAGGATCATTATTGAATTATGTTTCTAGATAGGTTGTAG  
CTGGCTC-TTTAGAGCATGTGCACGCCTGTTTGGACTTCATTTTCATCCACCTGTGCACC  
TATTGTAGTCTTTGGTTGGGTTAGGAGGAAGTGGTCATTGTGTCAGCATCTGCTGGATGT  
GAGGACTTGCAATTGTGAAAGCTTTGCTGTCCTTGATGTGATCATGGAATCTCTTTCTCAC  
TAGAGTCTATGTCACCTCATTATACTCTGTGCAATGTCATTGAATGTCTTTACATGGGCTT  
ATATGCCTATGAAAATTGTAATACAACCTTTAGCAACGGATCTCTTGGCTCTCGCATCGA  
TGAAGAACGCAGCGAAATGCGATAAGTAATGTGAATTGCAGAATTCAGTGAATCATCGAA  
TCTTTGAACGCATCTTGCGCTCCTTGGTATTCCGAGGAGCATGCCTGTTTGAGTGTCAATT  
AAATTCTCAACTCTCTTATAC-TTTTTGTAAAAGAGAGCTTGGACTGTGGAGGCTTGCT  
GGCCACTTTTTGGGGTCAGCTCCTCTGAAATGCATTAGCGGAACCGTTTGCAATCTGCCA  
CAAGTGTGATAAGTTATCTACACTGGCGAGGGGATTGCTCTCTGTAATGTTTCAGCTTCTA  
ATTGTCTCTACTTTGTGAGACAACTTTTGAATGCTTGACCTCAAATCAGGTAGGACTACC  
CGCTGAACTTAA

>ABC12-53

TTTCCGTAGGTGAACCTGCGGAAGGATCATTATTGAATTATGTTTCTAGATAGGTTGTAG  
CTGGCTC-TTTAGAGCATGTGCACGCCTGTTTGGACTTCATTTTCATCCACCTGTGCACC  
TATTGTAGTCTTTGGTTGGGTTAGGAGGAAGTGGTCATTGTGTCAGCATCTGCTGGATGT  
GAGGACTTGCAATTGTGAAAGCTTTGCTGTCCTTGATGTGATCATGGAATCTCTTTCTCAC  
TAGAGTCTATGTCACCTCATTATACTCTGTGCAATGTCATTGAATGTCTTTACATGGGCTT  
ATATGCCTATGAAAATTGTAATACAACCTTTAGCAACGGATCTCTTGGCTCTCGCATCGA  
TGAAGAACGCAGCGAAATGCGATAAGTAATGTGAATTGCAGAATTCAGTGAATCATCGAA  
TCTTTGAACGCATCTTGCGCTCCTTGGTATTCCGAGGAGCATGCCTGTTTGAGTGTCAATT  
AAATTCTCAACTCTCTTATAC-TTTTTGTAAAAGAGAGCTTGGACTGTGGAGGCTTGCT  
GGCCACTTTTTGGGGTCAGCTCCTCTGAAATGCATTAGCGGAACCGTTTGCAATCTGCCA  
CAAGTGTGATAAGTTATCTACACTGGCGAGGGGATTGCTCTCTGTAATGTTTCAGCTTCTA  
ATTGTCTCTACTTTGTGAGACAACTTTTGAATGCTTGACCTCAAATCAGGTAGGACTACC  
CGCTGAACTTAA

>ABC3-61

TTTCCGTAGGTGAACCTGCGGAAGGATCATTATTGAATTATGTTTCTAGATAGGTTGTAG  
CTGGCTC-TTTAGAGCATGTGCACGCCTGTTTGGACTTCATTTTCATCCACCTGTGCACC  
TATTGTAGTCTTTGGTTGGGTTAGGAGGAAGTGGTCATTGTGTCAGCATCTGCTGGATGT  
GAGGACTTGCAATTGTGAAAGCTTTGCTGTCCTTGATGTGATCATGGAATCTCTTTCTCAC  
TAGAGTCTATGTCACCTCATTATACTCTGTGCAATGTCATTGAATGTCTTTACATGGGCTT  
ATATGCCTATGAAAATTGTAATACAACCTTTAGCAACGGATCTCTTGGCTCTCGCATCGA  
TGAAGAACGCAGCGAAATGCGATAAGTAATGTGAATTGCAGAATTCAGTGAATCATCGAA  
TCTTTGAACGCATCTTGCGCTCCTTGGTATTCCGAGGAGCATGCCTGTTTGAGTGTCAATT  
AAATTCTCAACTCTCTTATAC-TTTTTGTAAAAGAGAGCTTGGACTGTGGAGGCTTGCT  
GGCCACTTTTTGGGGTCAGCTCCTCTGAAATGCATTAGCGGAACCGTTTGCAATCTGCCA  
CAAGTGTGATAAGTTATCTACACTGGCGAGGGGATTGCTCTCTGTAATGTTTCAGCTTCTA  
ATTGTCTCTACTTTGTGAGACAACTTTTGAATGCTTGACCTCAAATCAGGTAGGACTACC  
CGCTGAACTTAA

>ABC6-23

TTTCCGTAGGTGAACCTGCGGAAGGATCATTATTGAATTATGTTTCTAGATAGGTTGTAG



CTGGCTC-TTTAGAGCATGTGCACGCCTGTTTGGACTTCATTTTCATCCACCTGTGCACC  
TATTGTAGTCTTTGGTTGGGTTAGGGGGAAGTGGTCATTGTGTCAGCATCTGCTGGATGT  
GAGGACTTGCATTGTGAAAGCTTTGCTGTCCTTGATGTGATCATGGAATCTCTTTCTCAC  
TAGAGTCTATGTCACCTATTATACTCTGTGCAATGTCATTGAATGTCTTTACATGGGCTT  
ATATGCCTATGAAAATTGTAATACAACCTTTCAGCAACGGATCTCTTGGCTCTCGCATCGA  
TGAAGAACGCAGCGAAATGCGATAAGTAATGTGAATTGCAGAATTCAGTGAATCATCGAA  
TCTTTGAACGCATCTTGCCTCCTTGGTATTCCGAGGAGCATGCCTGTTTGAGTGTCAAT  
AAATTCTCAACTCTCTTATAC-TTTTTTGTAAGAGAGCTTGGACTGTGGAGGCTTGCT  
GGCCACTTTTTGGGGTCAGCTCCTCTGAAATGCATTAGCGGAACCGTTTGCAATCTGCCA  
CAAGTGTGATAAGTTATCTACACTGGCGAGGGGATTGCTCTCTGTAATGTTGAGCTTCTA  
ATTGTCTCTACTTTGTGAGACAACCTTTGAATGCTTGACCTCAAATCAGGTAGGACTACC  
CGCTGAACTTAA

>ABC1-74

TTTCCGTAGGTGAACCTGCGGAAGGATCATTATTGAATTATGTTTCTAGATAGGTTGTAG  
CTGGCTC-TTTAGAGCATGTGCACGCCTGTTTGGACTTCATTTTCATCCACCTGTGCACC  
TATTGTAGTCTTTGGTTGGGTTAGGGGGAAGTGGTCATTGTGTCAGCATCTGCTGGATGT  
GAGGACTTGCATTGTGAAAGCTTTGCTGTCCTTGATGTGATCATGGAATCTCTTTCTCAC  
TAGAGTCTATGTCACCTATTATACTCTGTGCAATGTCATTGAATGTCTTTACATGGGCTT  
GTATGCCTATGAAAATTGTAATACAACCTTTCAGCAACGGATCTCTTGGCTCTCGCATCGA  
TGAAGGACGCAGCGAAATGCGATAAGTAATGTGAATTGCAGAATTCAGTGAATCATCGAA  
TCTTTGAACGCATCTTGCCTCCTTGGTATTCCGAGGAGCATGCCTGTTTGAGTGTCAAT  
AAATTCTCAACTCTCTTATAC-TTTTTTGTAAGAGAGCTTGGACTGTGGAGGCTTGCT  
GGCCACTTTTTGGGGTCAGCTCCTCTGAAATGCATTAGCGGAACCGTTTGCGATCTGCCA  
CAAGTGTGATAAGTTATCTACACTGGCGAGGGGATTGCTCTCTGTAATGTTGAGCTTCTA  
ATTGTCTCTACTTTGTGAGACAACCTTTGAATGCTTGACCTCAAATCAGGTAGGACTACC  
CGCTGAACTTAA

>ABC8-26

TTTCCGTAGGTGAACCTGCGGAAGGATCATTATTGAATTATGTTTCTAGATAGGTTGTAG  
CTGGCTC-TTTAGAGCATGTGCACGCCTGTTTGGACTTCATTTTCATCCACCTGTGCACC  
TATTGTAGTCTTTGGTTGGGTTAGGGGGAAGTGGTCATTGTGTCAGCATCTGCTGGATGT  
GAGGACTTGCATTGTGAAAGCTTTGCTGTCCTTGATGTGATCATGGAATCTCTTTCTCAC  
TAGAGTCTATGTCACCTATTATACTCTGTGCAATGTCATTGAATGTCTTTACATGGGCTT  
GTATGCCTATGAAAATTGTAATACAACCTTTCAGCAACGGATCTCTTGGCTCTCGCATCGA  
TGAAGAACGCAGCGAAATGCGATAAGTAATGTGAATTGCAGAATTCAGTGAATCATCGAA  
TCTTTGAACGCATCTTGCCTCCTTGGTATTCCGAGGAGCATGCCTGTTTGAGTGTCAAT  
AAATTCTCAACTCTCTTATAC-TTTTTTGTAAGAGAGCTTGGACTGTGGAGGCTTGCT  
GGCCACTTTTTGGGGTCAGCTCCTCTGAAATGCATTAGCGGAACCGTTTGCGATCTGCCA  
CAAGTGTGATAAGTTATCTACACTGGCGAGGGGATTGCTCTCTGTAATGTTGAGCTTCTA  
ATTGTCTCTACTTTGTGAGACAACCTTTGAATGCTTGACCTCAAATCAGGTAGGACTACC  
CGCTGAACTTAA

>ABC5-64

TTTCCGTAGGTGAACCTGCGGAAGGATCATTATTGAATTATGTTTCTAGATAGGTTGTAG  
CTGGCTC-TTTAGAGCATGTGCACGCCTGTTTGGACTTCATTTTCATCCACCTGTGCACC  
TATTGTAGTCTTTGGTTGGGTTAGGAGGAAGTGGTCATTGTGTCAGCATCTGCTGGATGT  
GAGGACTTGCATTGTGAAAGCTTTGCTGTCCTTGATGTGATCATGGAATCTCTTTCTCAC  
TAGAGTCTATGTCACCTATTATACTCTGTGCAATGTCATTGAATGTCTTTACATGGGCTT  
GTATGCCTATGAAAATTGTAATACAACCTTTCAGCAACGGATCTCTTGGCTCTCGCATCGA  
TGAAGAACGCAGCGAAATGCGATAAGTAATGTGAATTGCAGAATTCAGTGAATCATCGAA  
TCTTTGAACGCATCTTGCCTCCTTGGTATTCCGAGGAGCATGCCTGTTTGAGTGTCAAT  
AAATTCTCAACTCTCTTATAC-TTTTTTGTAAGAGAGCTTGGACTGTGGAGGCTTGCT



GGCCACTTTTTGGGGTCAGCTCCTCTGAAATGCATTAGCGGAACCGTTTGCGATCTGCCA  
CAAGTGTGATAAGTTATCTACACTGGCGAGGGGATTGCTCTCTGTAATGTTGAGCTTCTA  
ATTGTCTCTACTTTGTGAGACAACTTTGAATGCTTGACCTCAAATCAGGTAGGACTACC  
CGCTGAACTTAA

>ABC10-11

TTTCCGTAGGTGAACCTGCGGAAGGATCATTATTGAATTATGTTTCTAGATAGGTTGTAG  
CTGGCTC-TTTAGAGCATGTGCACGCCTGTTTGGACTTCATTTTCATCCACCTGTGCACC  
TATTGTAGTCTTTGGTTGGGTTAGGAGGAAGTGGTCATTGTGTCAGCATCTGCTGGATGT  
GAGGACTTGCATTGTGAAAGCTTTGCTGTCCTTGATGTGATCATGGAATCTCTTTCTCAC  
TAGAGTCTATGTCACTCATTATACTCTGTGCAATGTCATTGAATGTCTTTACATGGGCTT  
GTATGCCTATGAAAATTGTAATACTTTTTCAGCAACGGATCTCTTGGCTCTCGCATCGA  
TGAAGAACGCAGCGAAATGCGATAAGTAATGTGAATTGCAGAATTCAGTGAATCATCGAA  
TCTTTGAACGCATCTTGCGCTCCTTGGTATTCCGAGGAGCATGCCTGTTTGAGTGTGATT  
AAATTCTCAACTCTCTTATAC-TTTTTGTAAAAGAGAGCTTGGACTGTGGAGGCTTGCT  
GGCCACTTTTTGGGGTCAGCTCCTCTGAAATGCATTAGCGGAACCGTTTGCAATCTGCCA  
CAAGTGTGATAAGTTATCTACACTGGCGAGGGGATTGCTCTCTGTAATGTTGAGCTTCTA  
ATTGTCTCTACTTTGTGAGACAACTTTGAATGCTTGACCTCAAATCAGGTAGGACTACC  
CGCTGAACTTAA

>ABC2-20

TTTCCGTAGGTGAACCTGCGGAAGGATCATTATTGAATTATGTTTCTAGATAGGTTGTAG  
CTGGCTC-TTTAGAGCATGTGCACGCCTGTTTGGACTTCATTTTCATCCACCTGTGCACC  
TATTGTAGTCTTTGGTTGGGTTAGGGGAAGTGGTCATTGTGTCAGCATCTGCTGGATGT  
GAGGACTTGCATTGTGAAAGCTTTGCTGTCCTTGATGTGATCATGGAATCTCTTTCTCAC  
TAGAGTCTATGTCACTCATTATACTCTGTGCAATGTCATTGAATGTCTTTACATGGGCTT  
GTATGCCTATGAAAATTGTAATACTTTTTCAGCAACGGATCTCTTGGCTCTCGCATCGA  
TGAAGGACGCAGCGAAATGCGATAAGTAATGTGAATTGCAGAATTCAGTGAATCATCGAA  
TCTTTGAACGCATCTTGCGCTCCTTGGTATTCCGAGGAGCATGCCTGTTTGAGTGTGATT  
AAATTCTCAACTCTCTTATAC-TTTTTGTAAAAGAGAGCTTGGACTGTGGAGGCTTGCT  
GGCCACTTTTTGGGGTCAGCTCCTCTGAAATGCATTAGCGGAACCGTTTGCAATCTGCCA  
CAAGTGTGATAAGTTATCTACACTGGGGAGGGGATTGCTCTCTGTAATGTTGAGCTTCTA  
ATTGTCTCTACTTTGTGAGACAACTTTGAATGCTTGACCTCAAATCAGGTAGGACTACC  
CGCTGAACTTAA

>ABC1-58

TTTCCGTAGGTGAACCTGCGGAAGGATCATTATTGAATTATGTTTCTAGATAGGTTGTAG  
CTGGCTC-TTTAGAGCATGTGCACGCCTGTTTGGACTTCATTTTCATCCACCTGTGCACC  
TATTGTAGTCTTTGGTTGGGTTAGGGGAAGTGGTCATTGTGTCAGCATCTGCTGGATGT  
GAGGACTTGCATTGTGAAAGCTTTGCTGTCCTTGATGTGATCATGGAATCTCTTTCTCAC  
TAGAGTCTATGTCACTCATTATACTCTGTGCAATGTCATTGAATGTATTTACATGGGCTT  
GTATGCCTATGAAAATTGTAATACTTTTTCAGCAACGGATCTCTTGGCTCTCGCATCGA  
TGAAGGACGCAGCGAAATGCGATAAGTAATGTGAATTGCAGAATTCAGTGAATCATCGAA  
TCTTTGAACGCATCTTGCGCTCCTTGGTATTCCGAGGAGCATGCCTGTTTGAGTGTGATT  
AAATTCTCAACTCTCTTATAC-TTTTTGTAAAAGAGAGCTTGGACTGTGGAGGCTTGCT  
GGCCACTTTTTGGGGTCAGCTCCTCTGAAATGCATTAGCGGAACCGTTTGCAATCTGCCA  
CAAGTGTGATAAGTTATCTACACTGGCGAGGGGATTGCTCTCTGTAATGTTGAGCTTCTA  
ATTGTCTCTACTTTGTGAGACAACTTTGAATGCTTGACCTCAAATCAGGTAGGACTACC  
CGCTGAACTTAA

>ABC9-36

TTTCCGTAGGTGAACCTGCGGAAGGATCATTATTGAATTATGTTTCTAGATAGGTTGTAG  
CTGGCTC-TTTAGAGCATGTGCACGCCTGTTTGGACTTCATTTTCATCCACCTGTGCACC  
TATTGTAGTCTTTGGTTGGGTTAGGGGAAGTGGTCATTGTGTCAGCATCTGCTGGATGT



GAGGACTTGCATTGTGAAAGCTTTGCTGTCCTTGATGTGATCATGGAATCTCTTTCTCAC  
TAGAGTCTATGTCACCTATTATACTCTGTGCAATGTCATTGAATGTCTTTACATGGGCTT  
GTATGCTTATGAAAATTGTAATACAACCTTTCAGCAACGGATCTCTTGGCTCTCGCATCGA  
TGAAGAACGCAGCGAAATGCGATAAGTAATGTGAATTGCAGAATTCAGTGAATCATCGAA  
TCTTTGAACGCATCTTGCGCTCCTTGGTATTCCGAGGAGCATGCCTGTTTGAGTGTGATT  
AAATTCTCAACTCTCTTATAC-TTTTTTGTAAGAGAGCTTGGACTGTGGAGGCTTGCT  
GGCCACTTTTTGGGGTCAGCTCCTCTGAAATGCATTAGCGGAACCGTTTGCGATCTGCCA  
CAAGTGTGATAAGTTATCTACACTGGCGAGGGGATTGCTCTCTGCAATGTTTCACTTCTA  
ATTGTCTCTACTTTGTGAGACAACCTTTGAATGCTTGACCTCAAATCAGGTAGGACTACC  
CGCTGAACTTAA

>ABC1-77

TTTCCGTAGGTGAACCTGCGGAAGGATCATTATTGAATTATGTTTCTAGATAGGTTGTAG  
CTGGCTC-TTLAGAGCATGTGCACGCCTGTTTGGACTTCATTTTCATCCACCTGTGCACC  
TATTGTAGTCTTTGGTTGGGTTAGGGGGAAGTGGTCATTGTGTCAGCATCTGCTGGATGT  
GAGGACTTGCATTGTGAAAGCTTTGCTGTCCTTGATGTGATCATGGAATCTCTTTCTCAC  
TAGAGTCTATGTCACCTATTATACTCTGTGCAATGTCATTGAATGTCTTTACATGGGCTT  
GTATGCCTATGAAAATTGTAATACAACCTTTCAGCAACGGATCTCTTGGCTCTCGCATCGA  
TGAAGGACGCAGCGAAATGCGATAAGTAATGTGAATTGCAGAATTCAGTGAATCATCGAA  
TCTTTGAACGCATCTTGCGCTCCTTGGTATTCCGAGGAGCATGCCTGTTTGAGTGTGATT  
AAATTCTCAACTCTCTTATAC-TTTTTTGTAAGAGAGCTTGGACTGTGGAGGCTTGCT  
GGCCACTTTTTGGGGTCAGCTCCTCTGAAATGCATTAGCGGAACCGTTTGCGATCTGCCA  
CAAGTGTGATAAGTTATCTACACTGGCGAGGGGATTGCTCTCTGTAATGTTTCACTTCTA  
ATTGTCTCTACTTTGTGAGACTACTTTTGAATGCTTGACCTCAAATCAGGTAGGACTACC  
CGCTGAACTTAA

>ABC5-46

TTTCCGTAGGTGAACCTGCGGAAGGATCATTATTGAATTATGTTTCTAGATAGGTTGTAG  
CTGGCTC-TTLAGAGCATGTGCACGCCTGTTTGGACTTCATTTTCATCCACCTGTGCACC  
TATTGTAGTCTTTGGTTGGGTTAGGGGGAAGTGGTCATTGTGTCAGCATCTGCTGGATGT  
GAGGACTTGCATTGTGAAAGCTTTGCTGTCCTTGATGTGATCATGGAATCTCTTTCTCAC  
TAGAGTCTATGTCACCTATTATACTCTGTGCAATGTCATTGAATGTCTTTACATGGGCTT  
GTATGCCTATGAAAATTGTAATACAACCTTTCAGCAACGGATCTCTTGGCTCTCGCATCGA  
TGAAGGACGCAGCGAAATGCGATAAGTAATGTGAATTGCAGAATTCAGTGAATCATCGAA  
TCTTTGAACGCATCTTGCGCTCCTTGGTATTCCGAGGAGCATGCCTGTTTGAGTGTGATT  
AAATTCTCAACTCTCTTATAC-TTTTTTGTAAGAGAGCTTGGACTGTGGAGGCTTGCT  
GGCCACTTTTTGGGGTCAGCTCCTCTGAAATGCATTAGCGGAACCGTTTGCGATCTGCCA  
CAAGTGTGATAAGTTATCTACACTGGCGAGGGGATTGCTCTCTGTAATGTTTCACTTCTA  
ATTGTCTCTACTTTGTGAGACTACTTTTGAATGCTTGACCTCAAATCAGGTAGGACTACC  
CGCTGAACTTAA

>ABC6-16

TTTCCGTAGGTGAACCTGCGGAAGGATCATTATTGAATTATGTTTCTAGATAGGTTGTAG  
CTGGCTC-TTLAGAGCATGTGCACGCCTGTTTGGACTTCATTTTCATCCACCTGTGCACC  
TATTGTAGTCTTTGGTTGGGTTAGGGGGAAGTGGTCATTGTGTCAGCATCTGCTGGATGT  
GAGGACTTGCATTGTGAAAGCTTTGCTGTCCTTGATGTGATCATGGAATCTCTTTCTCAC  
TAGAGTCTATGTCACCTATTATACTCTGTGCAATGTCATTGAATGTCTTTACATGGGCTT  
GTATGCCTATGAAAATTGTAATACAACCTTTCAGCAACGGATCTCTTGGCTCTCGCATCGA  
TGAAGGACGCAGCGAAATGCGATAAGTAATGTGAATTGCAGAATTCAGTGAATCATCGAA  
TCTTTGAACGCATCTTGCGCTCCTTGGTATTCCGAGGAGCATGCCTGTTTGAGTGTGATT  
AAATTCTCAACTCTCTTATAC-TTTTTTGTAAGAGAGCTTGGACTGTGGAGGCTTGCT  
GGCCACTTTTTGGGGTCAGCTCCTCTGAAATGCATTAGCGGAACCGTTTGCGATCTGCCA  
CAAGTGTGATAAGTTATCTACACTGGCGAGGGGATTGCTCTCTGTAATGTTTCACTTCTA



ATTGTCTCTACTTTGTGAGACTACTTTTGAATGCTTGACCTCAAATCAGGTAGGACTACC  
CGCTGAACTTAA

>ABC9-40

TTTCCGTAGGTGAACCTGCGGAAGGATCATTATTGAATTATGTTTCTAGATAGGTTGTAG  
CTGGCTC-TTTAGAGCATGTGCACGCCTGTTTGGACTTCATTTTCATCCACCTGTGCACC  
TATTGTAGTCTTTGGTTGGGTTAGGGGGAAGTGGTCATTGTGTCAGCATCTGCTGGATGT  
GAGGACTTGCATTGTGAAAGCTTTGCTGTCCTTGATGTGATCATGGAATCTCTTTCTCAC  
TAGAGTCTATGTCACTCATTATACTCTGTGCAATGTCATTGAATGTCTTTACATGGGCTT  
GTATGCCTATGAAAATTGTAATAACAACCTTTAGCAACGGATCTCTTGGCTCTCGCATCGA  
TGAAGGACGCAGCGAAATGCGATAAGTAATGTGAATTGCAGAATTCAGTGAATCATCGAA  
TCTTTGAACGCATCTTGCCTCCTTGGTATTCCGAGGAGCATGCCTGTTTGAGTGTCAAT  
AAATTCTCAACTCTCTTATAC-TTTTTGTAAAAGAGAGCTTGGACTGTGGAGGCTTGCT  
GGCCACTTTTTGGGGTCAGCTCCTCTGAAATGCATTAGCGGAACCGTTTGCGATCTGCCA  
CAAGTGTGATAAGTTATCTACACTGGCGAGGGGATTGCTCTCTGTAATGTTTCACTTCTA  
ATTGTCTCTACTTTGTGAGACTACTTTTGAATGCTTGACCTCAAATCAGGTAGGACTACC  
CGCTGAACTTAA

>ABC8-47

TTTCCGTAGGTGAACCTGCGGAAGGATCATTATTGAATTATGTTTCTAGATAGGTTGTAG  
CTGGCTC-TTTAGAGCATGTGCACGCCTGTTTGGACTTCATTTTCATCCACCTGTGCACC  
TATTGTAGTCTTTGGTTGGGTTAGGGGGAAGTGGTCATTGTGTCAGCATCTGCTGGATGT  
GAGGACTTGCATTGTGAAAGCTTTGCTGTCCTTGATGTGATCATGGAATCTCTTTCTCAC  
TAGAGTCTATGTCACTCATTATACTCTGTGCAATGTCATTGAATGTCTTTACATGGGCTT  
GTATGCCTATGAAAATTGTAATAACAACCTTTAGCAACGGATCTCTTGGCTCTCGCATCGA  
TGAAGGACGCAGCGAAATGCGATAAGTAATGTGAATTGCAGAATTCAGTGAATCATCGAA  
TCTTTGAACGCATCTTGCCTCCTTGGTATTCCGAGGAGCATGCCTGTTTGAGTGTCAAT  
AAATTCTCAACTCTCTTATAC-TTTTTGTAAAAGAGAGCTTGGACTGTGGAGGCTTGCT  
GGCCACTTTTTGGGGTCAGCTCCTCTGAAATGCATTAGCGGAACCGTTTGCGATCTGCCA  
CAAGTGTGATAAGTTATCTACACTGGCGAGGGGATTGCTCTCTGTAATGTTTCACTTCTA  
ATTGTCTCTACTTTGTGAGACTACTTTTGAATGCTTGACCTCAAATCAGGTAGGACTACC  
CGCTGAACTTAA

>ABC8-1

TTTCCGTAGGTGAACCTGCGGAAGGATCATTATTGAATTATGTTTCTAGATAGGTTGTAG  
CTGGCTC-TTTAGAGCATGTGCACGCCTGTTTGGACTTCATTTTCATCCACCTGTGCACC  
TATTGTAGTCTTTGGTTGGGTTAGGGGGAAGTGGTCATTGTGTCAGCATCTGCTGGATGT  
GAGGACTTGCATTGTGAAAGCTTTGCTGTCCTTGATGTGATCATGGAATCTCTTTCTCAC  
TAGAGTCTATGTCACTCATTATACTCTGTGCAATGTCATTGAATGTCTTTACATGGGCTT  
GTATGCCTATGAAAATTGTAATAACAACCTTTAGCAACGGATCTCTTGGCTCTCGCATCGA  
TGAAGGACGCAGCGAAATGCGATAAGTAATGTGAATTGCAGAATTCAGTGAATCATCGAA  
TCTTTGAACGCATCTTGCCTCCTTGGTATTCCGAGGAGCATGCCTGTTTGAGTGTCAAT  
AAATTCTCAACTCTCTTATAC-TTTTTGTAAAAGAGAGCTTGGACTGTGGAGGCTTGCT  
GGCCACTTTTTGGGGTCAGCTCCTCTGAAATGCATTAGCGGAACCGTTTGCGATCTGCCA  
CAAGTGTGATAAGTTATCTACACTGGCGAGGGGATTGCTCTCTGTAATGTTTCACTTCTA  
ATTGTCTCTACTTTGTGAGACTACTTTTGAATGCTTGACCTCAAATCAGGTAGGACTACC  
CGCTGAACTTAA

>ABC1-29

TTTCCGTAGGTGAACCTGCGGAAGGATCATTATTGAATTATGTTTCTAGATAGGTTGTAG  
CTGGCTC-TTTAGAGCATGTGCACGCCTGTTTGGACTTCATTTTCATCCACCTGTGCACC  
TATTGTAGTCTTTGGTTGGGTTAGGGGGAAGTGGTCATTGTGTCAGCATCTGCTGGATGT  
GAGGACTTGCATTGTGAAAGCTTTGCTGTCCTTGATGTGATCATGGAATCTCTTTCTCAC  
TAGAGTCTATGTCACTCATTATACTCTGTGCAATGTCATTGAATGTCTTTACATGGGCTT



GTATGCCTATGAAAATTGTAATACAACCTTTTCAGCAACGGATCTCTTGGCTCTCGCATCGA  
TGAAGGACGCAGCGAAATGCGATAAGTAATGTGAATTGCAGAATTCAGTGAATCATCGAA  
TCTTTGAACGCATCTTGCCTCCTTGGTATTCCGAGGAGCATGCCTGTTTGAGTGTCAAT  
AAATTCTCAACTCTCTTATAC-TTTTTTGTAAAAGAGAGCTTGGACTGTGGAGGCTTGCT  
GGCCACTTTTTGGGGTCAGCTCCTCTGAAATGCATTAGCGGAACCGTTTGCAATCTGCCA  
CAAGTGTGATAAGTTATCTACACTGGCGAGGGGATTGCTCTCTGTAATGTTTCAGCTTCTA  
ATTGTCTCTACTTTGTGAGACTACTTTTGAATGCTTGACCTCAAATCAGGTAGGACTACC  
CGCTGAACTTAA

>ABC5-48

TTTCCGTAGGTGAACCTGCGGAAGGATCATTATTGAATTATGTTTCTAGATAGGTTGTAG  
CTGGCTC-TTTAGAGCATGTGCACGCCTGTTTGGACTTCATTTTCATCCACCTGTGCACC  
TATTGTAGTCTTTGGTTGGGTTAGGGGGAAGTGGTCATTGTGTCAGCATCTGCTGGATGT  
GAGGACTTGCATTGTGAAAGCTTTGCTGTCCTTGATGTGATCATGGAATCTCTTTCTCAC  
TAGAGTCTATGTCACCTCATTATACTCTGTCTGAATGTCATTGAATGTCTTTACATGGGCTT  
GTATGCCTATGAAAATTGTAATACAACCTTTTCAGCAACGGATCTCTTGGCTCTCGCATCGA  
TGAAGGACGCAGCGAAATGCGATAAGTAATGTGAATTGCAGAATTCAGTGAATCATCGAA  
TCTTTGAACGCATCTTGCCTCCTTGGTATTCCGAGGAGCATGCCTGTTTGAGTGTCAAT  
AAATTCTCAACTCTCTTATAC-TTTTTTGTAAAAGAGAGCTTGGACTGTGGAGGCTTGCT  
GGCCACTTTTTGGGGTCAGCTCCTCTGAAATGCATTAGCGGAACCGTTTGCAATCTGCCA  
CAAGTGTGATAAGTTATCTACACTGGCGAGGGGATTGCTCTCTGTAATGTTTCAGCTTCTA  
ATTGTCTCTACTTTGTGAGACTACTTTTGAATGCTTGACCTCAAATCAGGTAGGACTACC  
CGCTGAACTTAA

>ABC8-55

TTTCCGTAGGTGAACCTGCGGAAGGATCATTATTGAATTATGTTTCTAGATAGGTTGTAG  
CTGGCTC-TTTAGAGCATGTGCACGCCTGTTTGGACTTCATTTTCATCCACCTGTGCACC  
TATTGTAGTCTTTGGTTGGGTTAGGGGGAAGTGGTCATTGTGTCAGCATCTGCTGGATGT  
GAGGACTTGCATTGTGAAAGCTTTGCTGTCCTTGATGTGATCATGGAATCTCTTTCTCAC  
TAGAGTCTATGTCACCTCATTATACTCTGTCTGAATGTCATTGAATGTCTTTACATGGGCTT  
GTATGCCTATGAAAATTGTAATACAACCTTTTCAGCAACGGATCTCTTGGCTCTCGCATCGA  
TGAAGGACGCAGCGAAATGCGATAAGTAATGTGAATTGCAGAATTCAGTGAATCATCGAA  
TCTTTGAACGCATCTTGCCTCCTTGGTATTCCGAGGAGCATGCCTGTTTGAGTGTCAAT  
AAATTCTCAACTCTCTTATAC-TTTTTTGTAAAAGAGAGCTTGGACTGTGGAGGCTTGCT  
GGCCACTTTTTGGGGTCAGCTCCTCTGAAATGCATTAGCGGAACCGTTTGCAATCTGCCA  
CAAGTGTGATAAGTTATCTACACTGGCGAGGGGATTGCTCTCTGTAATGTTTCAGCTTCTA  
ATTGTCTCTACTTTGTGAGACTACTTTTGAATGCTTGACCTCAAATCAGGTAGGACTACC  
CGCTGAACTTAA

>ABC4-61

TTTCCGTAGGTGAACCTGCGGAAGGATCATTATTGAATTATGTTTCTAGATAGGTTGTAG  
CTGGCTC-TTTAGAGCATGTGCACGCCTGTTTGGACTTCATTTTCATCCACCTGTGCACC  
TATTGTAGTCTTTGGTTGGGTTAGGGGGAAGTGGTCATTGTGTCAGCATCTGCTGGATGT  
GAGGACTTGCATTGTGAAAGCTTTGCTGTCCTTGATGTGATCATGGAATCTCTTTCTCAC  
TAGAGTCTATGTCACCTCATTATACTCTGTCTGAATGTCATTGAATGTCTTTACATGGGCTT  
GTATGCCTATGAAAATTGTAATACAACCTTTTCAGCAACGGATCTCTTGGCTCTCGCATCGA  
TGAAGGACGCAGCGAAATGCGATAAGTAATGTGAATTGCAGAATTCAGTGAATCATCGAA  
TCTTTGAACGCATCTTGCCTCCTTGGTATTCCGAGGAGCATGCCTGTTTGAGTGTCAAT  
AAATTCTCAACTCTCTTATAC-TTTTTTGTAAAAGAGAGCTTGGACTGTGGAGGCTTGCT  
GGCCACTTTTTGGGGTCAGCTCCTCTGAAATGCATTAGCGGAACCGTTTGCAATCTGCCA  
CAAGTGTGATAAGTTATCTACACTGGCGAGGGGATTGCTCTCTGTAATGTTTCAGCTTCTA  
ATTGTCTCTACTTTGTGAGACTACTTTTGAATGCTTGACCTCAAATCAGGTAGGACTACC  
CGCTGAACTTAA



>ABC6-26

TTTCCGTAGGTGAACCTGCGGAAGGATCATTATTGAATTATGTTTCTAGATAGGTTGTAG  
CTGGCTC-TTTAGAGCATGTGCACGCCTGTTTGGACTTCATTTTCATCCACCTGTGCACC  
TATTGTAGTCTTTGGTTGGGTTAGGGGGAAGTGGTCATTGTGTCAGCATCTGCTGGATGT  
GAGGACTTGCATTGTGAAAGCTTTGCTGTCCTTGATGTGATCATGGAATCTCTTTCTCAC  
TAGAGTCTATGTCACCTCATTATACTCTGTGCGAATGTCATTGAATGTCTTTACATGGGCTT  
GTATGCCTATGAAAATTGTAATACAACCTTTCAGCAACGGATCTCTTGGCTCTCGCATCGA  
TGAAGGACGCAGCGAAATGCGATAAGTAATGTGAATTGCAGAATTCAGTGAATCATCGAA  
TCTTTGAACGCATCTTGCGCTCCTTGGTATTCCGAGGAGCATGCCTGTTTGAGTGTCAAT  
AAATTCTCAACTCTCTTATAC-TTTTTGTAAAAGAGAGCTTGGACTGTGGAGGCTTGCT  
GGCCACTTTTTGGGGTCAGCTCCTCTGAAATGCATTAGCGGAACCGTTTGCAATCTGCCA  
CAAGTGTGATAAGTTATCTACACTGGCGAGGGGATTGCTCTCTGTAATGTTTCAGCTTCTA  
ATTGTCTCTACTTTGTGAGACTACTTTTGAATGCTTGACCTCAAATCAGGTAGGACTACC  
CGCTGAACTTAA

>ABC6-25

TTTCCGTAGGTGAACCTGCGGAAGGATCATTATTGAATTATGTTTCTAGATAGGTTGTAG  
CTGGCTC-TTTAGAGCATGTGCACGCCTGTTTGGACTTCATTTTCATCCACCTGTGCACC  
TATTGTAGTCTTTGGTTGGGTTAGGGGGAAGTGGTCATTGTGTCAGCATCTGCTGGATGT  
GAGGACTTGCATTGTGAAAGCTTTGCTGTCCTTGATGTGATCATGGAATCTCTTTCTCAC  
TAGAGTCTATGTCACCTCATTATACTCTGTGCGAATGTCATTGAATGTCTTTACATGGGCTT  
GTATGCCTATGAAAATTGTAATACAACCTTTCAGCAACGGATCTCTTGGCTCTCGCATCGA  
TGAAGAACGCAGCGAAATGCGATAAGTAATGTGAATTGCAGAATTCAGTGAATCATCGAA  
TCTTTGAACGCATCTTGCGCTCCTTGGTATTCCGAGGAGCATGCCTGTTTGAGTGTCAAT  
AAATTCTCAACTCTCTTATAC-TTTTTGTAAAAGAGAGCTTGGACTGTGGAGGCTTGCT  
GGCCACTTTTTGGGGTCAGCTCCTCTGAAATGCATTAGCGGAACCGTTTGCAATCTGCCA  
CAAGTGTGATAAGTTATCTACACTGGCGAGGGGATTGCTCTCTGTAATGTTTCAGCTTCTA  
ATTGTCTCTACTTTGTGAGACTACTTTTGAATGCTTGACCTCAAATCAGGTAGGACTACC  
CGCTGAACTTAA

>ABC8-19

TTTCCGTAGGTGAACCTGCGGAAGGATCATTATTGAATTATGTTTCTAGATAGGTTGTAG  
CTGGCTC-TTTAGAGCATGTGCACGCCTGTTTGGACTTCATTTTCATCCACCTGTGCACC  
TATTGTAGTCTTTGGTTGGGTTAGGGGGAAGTGGTCATTGTGTCAGCATCTGCTGGATGT  
GAGGACTTGCATTGTGAAAGCTTTGCTGTCCTTGATGTGATCATGGAATCTCTTTCTCAC  
TAGAGTCTATGTCACCTCATTATACTCTGTGCGAATGTCATTGAATGTCTTTACATGGGCTT  
GTATGCCTATGAAAATTGTAATACAACCTTTCAGCAACGGATCTCTTGGCTCTCGCATCGA  
TGAAGAACGCAGCGAAATGCGATAAGTAATGTGAATTGCAGAATTCAGTGAATCATCGAA  
TCTTTGAACGCATCTTGCGCTCCTTGGTATTCCGAGGAGCATGCCTGTTTGAGTGTCAAT  
AAATTCTCAACTCTCTTATAC-TTTTTGTAAAAGAGAGCTTGGACTGTGGAGGCTTGCT  
GGCCACTTTTTGGGGTCAGCTCCTCTGAAATGCATTAGCGGAACCGTTTGCAATCTGCCA  
CAAGTGTGATAAGTTATCTACACTGGCGAGGGGATTGCTCTCTGTAATGTTTCAGCTTCTA  
ATTGTCTCTACTTTGTGAGACTACTTTTGAATGCTTGACCTCAAATCAGGTAGGACTACC  
CGCTGAACTTAA

>ABC6-33

TTTCCGTAGGTGAACCTGCGGAAGGATCATTATTGAATTATGTTTCTAGATAGGTTGTAG  
CTGGCTC-TTTAGAGCATGTGCACGCCTGTTTGGACTTCATTTTCATCCACCTGTGCACC  
TATTGTAGTCTTTGGTTGGGTTAGGGGGAAGTGGTCATTGTGTCAGCATCTGCTGGATGT  
GAGGACTTGCATTGTGAAAGCTTTGCTGTCCTTGATGTGATCATGGAATCTCTTTCTCAC  
TAGAGTCTATGTCACCTCATTATACTCTGTGCGAATGTCATTGAATGTCTTTACATGGGCTT  
ATATGCCTATGAAAATTGTAATACAACCTTTCAGCAACGGATCTCTTGGCTCTCGCATCGA  
TGAAGAACGCAGCGAAATGCGATAAGTAATGTGAATTGCAGAATTCAGTGAATCATCGAA



TCTTTGAACGCATCTTGCGCTCCTTGGTATTCCGAGGAGCATGCCTGTTTGAGTGTCAATT  
AAATTCTCAACTCTCTTATAC-TTTTTGTAAAAGAGAGCTTGGACTGTGGAGGCTTGCT  
GGCCACTTTTTGGGGTCAGCTCCTCTGAAATGCATTAGCGGAACCGTTTGCGATCTGCCA  
CAAGTGTGATAAGTTATCTACACTGGCGAGGGGATTGCTCTCTGTAATGTTTCAGCTTCTA  
ATTGTCTCTACTTTGTGAGACTACTTTTGAATGCTTGACCTCAAATCAGGTAGGACTACC  
CGCTGAACTTAA

>ABC11-10

TTTCCGTAGGTGAACCTGCGGAAGGATCATTATTGAATTATGTTTCTAGATAGGTTGTAG  
CTGGCTC-TTTAGAGCATGTGCACGCCTGTTTGGACTTCATTTTCATCCACCTGTGCACC  
TATTGTAGTCTTTGGTTGGGTTAGGGGGAAGTGGTCATTGTGTCAGCATCTGCTGGATGT  
GAGGACTTGCAATTGTGAAAGCTTTGCTGTCCTTGATGTGATCATGGAATCTCTTTCTCAC  
TAGAGTCTATGTCACCTCATTATACTCTGTGCAATGTCATTGAATGTCTTTACATGGGCTT  
ATATGCCTATGAAAATTGTAATACAACCTTTCAGCAACGGATCTCTTGGCTCTCGCATCGA  
TGAAGAACGCAGCGAAATGCGATAAGTAATGTGAATTGCAGAATTCAGTGAATCATCGAA  
TCTTTGAACGCATCTTGCGCTCCTTGGTATTCCGAGGAGCATGCCTGTTTGAGTGTCAATT  
AAATTCTCAACTCTCTTATAC-TTTTTGTAAAAGAGAGCTTGGACTGTGGAGGCTTGCT  
GGCCACTTTTTGGGGTCAGCTCCTCTGAAATGCATTAGCGGAACCGTTTGCGATCTGCCA  
CAAGTGTGATAAGTTATCTACACTGGCGAGGGGATTGCTCTCTGTAATGTTTCAGCTTCTA  
ATTGTCTCTACTTTGTGAGACTACTTTTGAATGCTTGACCTCAAATCAGGTAGGACTACC  
CGCTGAACTTAA

>ABC6-44

TTTCCGTAGGTGAACCTGCGGAAGGATCATTATTGAATTATGTTTCTAGATAGGTTGTAG  
CTGGCTC-TTTAGAGCATGTGCACGCCTGTTTGGACTTCATTTTCATCCACCTGTGCACC  
TATTGTAGTCTTTGGTTGGGTTAGGGGGAAGTGGTCATTGTGTCAGCATCTGCTGGATGT  
GAGGACTTGCAATTGTGAAAGCTTTGCTGTCCTTGATGTGATCATGGAATCTCTTTCTCAC  
TAGAGTCTATGTCACCTCATTATACTCTGTGCAATGTCATTGAATGTCTTTACATGGGCTT  
ATATGCCTATGAAAATTGTAATACAACCTTTCAGCAACGGATCTCTTGGCTCTCGCATCGA  
TGAAGGACGCAGCGAAATGCGATAAGTAATGTGAATTGCAGAATTCAGTGAATCATCGAA  
TCTTTGAACGCATCTTGCGCTCCTTGGTATTCCGAGGAGCATGCCTGTTTGAGTGTCAATT  
AAATTCTCAACTCTCTTATAC-TTTTTGTAAAAGAGAGCTTGGACTGTGGAGGCTTGCT  
GGCCACTTTTTGGGGTCAGCTCCTCTGAAATGCATTAGCGGAACCGTTTGCGATCTGCCA  
CAAGTGTGATAAGTTATCTACACTGGCGAGGGGATTGCTCTCTGTAATGTTTCAGCTTCTA  
ATTGTCTCTACTTTGTGAGACTACTTTTGAATGCTTGACCTCAAATCAGGTAGGACTACC  
CGCTGAACTTAA

>ABC7-4

TTTCCGTAGGTGAACCTGCGGAAGGATCATTATTGAATTATGTTTCTAGATAGGTTGTAG  
CTGGCTC-TTTAGAGCATGTGCACGCCTGTTTGGACTTCATTTTCATCCACCTGTGCACC  
TATTGTAGTCTTTGGTTGGGTTAGGGGGAAGTGGTCATTGTGTCAGCATCTGCTGGATGT  
GAGGACTTGCAATTGTGAAAGCTTTGCTGTCCTTGATGTGATCATGGAATCTCTTTCTCAC  
TAGAGTCTATGTCACCTCATTATACTCTGTGCAATGTCATTGAATGTCTTTACATGGGCTT  
ATATGCCTATGAAAATTGTAATACAACCTTTCAGCAACGGATCTCTTGGCTCTCGCATCGA  
TGAAGGACGCAGCGAAATGCGATAAGTAATGTGAATTGCAGAATTCAGTGAATCATCGAA  
TCTTTGAACGCATCTTGCGCTCCTTGGTATTCCGAGGAGCATGCCTGTTTGAGTGTCAATT  
AAATTCTCAACTCTCTTATAC-TTTTTGTAAAAGAGAGCTTGGACTGTGGAGGCTTGCT  
GGCCACTTTTTGGGGTCAGCTCCTCTGAAATGCATTAGCGGAACCGTTTGCAATCTGCCA  
CAAGTGTGATAAGTTATCTACACTGGCGAGGGGATTGCTCTCTGTAATGTTTCAGCTTCTA  
ATTGTCTCTACTTTGTGAGACTACTTTTGAATGCTTGACCTCAAATCAGGTAGGACTACC  
CGCTGAACTTAA

>ABC2-72

TTTCCGTAGGTGAACCTGCGGAAGGATCATTATTGAATTATGTTTCTAGATAGGTTGTAG



CTGGCTC-TTTAGAGCATGTGCACGCCTGTTTGGACTTCATTTTCATCCACCTGTGCACC  
TATTGTAGTCTTTGGTTGGGTTAGGAGGAAGTGGTCATTGTGTCAGCATCTGCTGGATGT  
GAGGACTTGCATTGTGAAAGCTTTGCTGTCCTTGATGTGATCATGGAATCTCTTTCTCAC  
TAGAGTCTATGTCACCTATTATACTCTGTGCAATGTCATTGAATGTCTTTACATGGGCTT  
GTATGCCTATGAAAATTGTAATACAACCTTTCAGCAACGGATCTCTTGGCTCTCGCATCGA  
TGAAGAACGCAGCGAAATGCGATAAGTAATGTGAATTGCAGAATTCAGTGAATCATCGAA  
TCTTTGAACGCATCTTGCCTCCTTGGTATTCCGAGGAGCATGCCTGTTTGAGTGTCAAT  
AAATTCTCAACTCTCTTATAC-TTTTTTGTAAGAGAGCTTGGACTGTGGAGGCTTGCT  
GGCCACTTTTTGGGGTCAGCTCCTCTGAAATGCATTAGCGGAACCGTTTGCGATCTGCCA  
CAAGTGTGATAAGTTATCTACACTGGCGAGGGGATTGCTCTCTGTAATGTTGAGCTTCTA  
ATTGTCTCTACTTTGTGAGACTACTTTTGAATGCTTGACCTCAAATCAGGTAGGACTACC  
CGCTGAACTTAA

>ABC10-50

TTTCCGTAGGTGAACCTGCGGAAGGATCATTATTGAATTATGTTTCTAGATAGGTTGTAG  
CTGGCTC-TTTAGAGCATGTGCACGCCTGTTTGGACTTCATTTTCATCCACCTGTGCACC  
TATTGTAGTCTTTGGTTGGGTTAGGAGGAAGTGGTCATTGTGTCAGCATCTGCTGGATGT  
GAGGACTTGCATTGTGAAAGCTTTGCTGTCCTTGATGTGATCATGGAATCTCTTTCTCAC  
TAGAGTCTATGTCACCTATTATACTCTGTGCAATGTCATTGAATGTCTTTACATGGGCTT  
GTATGCCTATGAAAATTGTAATACAACCTTTCAGCAACGGATCTCTTGGCTCTCGCATCGA  
TGAAGAACGCAGCGAAATGCGATAAGTAATGTGAATTGCAGAATTCAGTGAATCATCGAA  
TCTTTGAACGCATCTTGCCTCCTTGGTATTCCGAGGAGCATGCCTGTTTGAGTGTCAAT  
AAATTCTCAACTCTCTTATAC-TTTTTTGTAAGAGAGCTTGGACTGTGGAGGCTTGCT  
GGCCACTTTTTGGGGTCAGCTCCTCTGAAATGCATTAGCGGAACCGTTTGCGATCTGCCA  
CAAGTGTGATAAGTTATCTACACTGGCGAGGGGATTGCTCTCTGTAATGTTGAGCTTCTA  
ATTGTCTCTACTTTGTGAGACTACTTTTGAATGCTTGACCTCAAATCAGGTAGGACTACC  
CGCTGAACTTAA

>ABC3-67

TTTCCGTAGGTGAACCTGCGGAAGGATCATTATTGAATTATGTTTCTAGATAGGTTGTAG  
CTGGCTC-TTTAGAGCATGTGCACGCCTGTTTGGACTTCATTTTCATCCACCTGTGCACC  
TATTGTAGTCTTTGGTTGGGTTAGGAGGAAGTGGTCATTGTGTCAGCATCTGCTGGATGT  
GAGGACTTGCATTGTGAAAGCTTTGCTGTCCTTGATGTGATCATGGAATCTCTTTCTCAC  
TAGAGTCTATGTCACCTATTATACTCTGTGCAATGTCATTGAATGTCTTTACATGGGCTT  
GTATGCCTATGAAAATTGTAATACAACCTTTCAGCAACGGATCTCTTGGCTCTCGCATCGA  
TGAAGAACGCAGCGAAATGCGATAAGTAATGTGAATTGCAGAATTCAGTGAATCATCGAA  
TCTTTGAACGCATCTTGCCTCCTTGGTATTCCGAGGAGCATGCCTGTTTGAGTGTCAAT  
AAATTCTCAACTCTCTTATAC-TTTTTTGTAAGAGAGCTTGGACTGTGGAGGCTTGCT  
GGCCACTTTTTGGGGTCAGCTCCTCTGAAATGCATTAGCGGAACCGTTTGCGATCTGCCA  
CAAGTGTGATAAGTTATCTACACTGGCGAGGGGATTGCTCTCTGTAATGTTGAGCTTCTA  
ATTGTCTCTACTTTGTGAGACTACTTTTGAATGCTTGACCTCAAATCAGGTAGGACTACC  
CGCTGAACTTAA

>ABC2-74

TTTCCGTAGGTGAACCTGCGGAAGGATCATTATTGAATTATGTTTCTAGATAGGTTGTAG  
CTGGCTC-TTTAGAGCATGTGCACGCCTGTTTGGACTTCATTTTCATCCACCTGTGCACC  
TATTGTAGTCTTTGGTTGGGTTAGGGGGAAGTGGTCATTGTGTCAGCATCTGCTGGATGT  
GAGGACTTGCATTGTGAAAGCTTTGCTGTCCTTGATGTGATCATGGAATCTCTTTCTCAC  
TAGAGTCTATGTCACCTATTATACTCTGTGCAATGTCATTGAATGTCTTTACATGGGCTT  
GTATGCCTATGAAAATTGTAATACAACCTTTCAGCAACGGATCTCTTGGCTCTCGCATCGA  
TGAAGAACGCAGCGAAATGCGATAAGTAATGTGAATTGCAGAATTCAGTGAATCATCGAA  
TCTTTGAACGCATCTTGCCTCCTTGGTATTCCGAGGAGCATGCCTGTTTGAGTGTCAAT  
AAATTCTCAACTCTCTTATAC-TTTTTTGTAAGAGAGCTTGGACTGTGGAGGCTTGCT



GGCCACTTTTTGGGGTCAGCTCCTCTGAAATGCATTAGCGGAACCGTTTGCGATCTGCCA  
CAAGTGTGATAAGTTATCTACACTGGCGAGGGGATTGCTCTCTGTAATGTTGAGCTTCTA  
ATTGTCTCTACTTTGTGAGACTACTTTTGAATGCTTGACCTCAAATCAGGTAGGACTACC  
CGCTGAACTTAA

>ABC3-16

TTTCCGTAGGTGAACCTGCGGAAGGATCATTATTGAATTATGTTTCTAGATAGGTTGTAG  
CTGGCTC-TTTAGAGCATGTGCACGCCTGTTTGGACTTCATTTTCATCCACCTGTGCACC  
TATTGTAGTCTTTGGTTGGGTTAGGGGGAAGTGGTCATTGTGTCAGCATCTGCTGGATGT  
GAGGACTTGCATTGTGAAAGCTTTGCTGTCCTTGATGTGATCATGGAATCTCTTTCTCAC  
TAGAGTCTATGTCACTCATTATACTCTGTGCAATGTCATTGAATGTCTTTACATGGGCTT  
GTATGCCTATGAAAATTGTAATACTTTTTCAGCAACGGATCTCTTGGCTCTCGCATCGA  
TGAAGAACGCAGCGAAATGCGATAAGTAATGTGAATTGCAGAATTCAGTGAATCATCGAA  
TCTTTGAACGCATCTTGCGCTCCTTGGTATTCCGAGGAGCATGCCTGTTTGAGTGTGATT  
AAATTCTCAACTCTCTTATAC-TTTTTGTAAAAGAGAGCTTGGACTGTGGAGGCTTGCT  
GGCCACTTTTTGGGGTCAGCTCCTCTGAAATGCATTAGCGGAACCGTTTGCGATCTGCCA  
CAAGTGTGATAAGTTATCTACACTGGCGAGGGGATTGCTCTCTGTAATGTTGAGCTTCTA  
ATTGTCTCTACTTTGTGAGACTACTTTTGAATGCTTGACCTCAAATCAGGTAGGACTACC  
CGCTGAACTTAA

>ABC4-39

TTTCCGTAGGTGAACCTGCGGAAGGATCATTATTGAATTATGTTTCTAGATAGGTTGTAG  
CTGGCTC-TTTAGAGCATGTGCACGCCTGTTTGGACTTCATTTTCATCCACCTGTGCACC  
TATTGTAGTCTTTGGTTGGGTTAGGGGGAAGTGGTCATTGTGTCAGCATCTGCTGGATGT  
GAGGACTTGCATTGTGAAAGCTTTGCTGTCCTTGATGTGATCATGGAATCTCTTTCTCAC  
TAGAGTCTATGTCACTCATTATACTCTGTGCAATGTCATTGAATGTCTTTACATGGGCTT  
GTATGCCTATGAAAATTGTAATACTTTTTCAGCAACGGATCTCTTGGCTCTCGCATCGA  
TGAAGAACGCAGCGAAATGCGATAAGTAATGTGAATTGCAGAATTCAGTGAATCATCGAA  
TCTTTGAACGCATCTTGCGCTCCTTGGTATTCCGAGGAGCATGCCTGTTTGAGTGTGATT  
AAATTCTCAACTCTCTTATAC-TTTTTGTAAAAGAGAGCTTGGACTGTGGAGGCTTGCT  
GGCCACTTTTTGGGGTCAGCTCCTCTGAAATGCATTAGCGGAACCGTTTGCGATCTGCCA  
CAAGTGTGATAAGTTATCTACACTGGCGAGGGGATTGCTCTCTGTAATGTTGAGCTTCTA  
ATTGTCTCTACTTTGTGAGACTACTTTTGAATGCTTGACCTCAAATCAGGTAGGACTACC  
CGCTGAACTTAA

>ABC8-37

TTTCCGTAGGTGAACCTGCGGAAGGATCATTATTGAATTATGTTTCTAGATAGGTTGTAG  
CTGGCTC-TTTAGAGCATGTGCACGCCTGTTTGGACTTCATTTTCATCCACCTGTGCACC  
TATTGTAGTCTTTGGTTGGGTTAGGGGGAAGTGGTCATTGTGTCAGCATCTGCTGGATGT  
GAGGACTTGCATTGTGAAAGCTTTGCTGTCCTTGATGTGATCATGGAATCTCTTTCTCAC  
TAGAGTCTATGTCACTCATTATACTCTGTGCAATGTCATTGAATGTCTTTACATGGGCTT  
GTATGCCTATGAAAATTGTAATACTTTTTCAGCAACGGATCTCTTGGCTCTCGCATCGA  
TGAAGAACGCAGCGAAATGCGATAAGTAATGTGAATTGCAGAATTCAGTGAATCATCGAA  
TCTTTGAACGCATCTTGCGCTCCTTGGTATTCCGAGGAGCATGCCTGTTTGAGTGTGATT  
AAATTCTCAACTCTCTTATAC-TTTTTGTAAAAGAGAGCTTGGACTGTGGAGGCTTGCT  
GGCCACTTTTTGGGGTCAGCTCCTCTGAAATGCATTAGCGGAACCGTTTGCGATCTGCCA  
CAAGTGTGATAAGTTATCTACACTGGCGAGGGGATTGCTCTCTGTAATGTTGAGCTTCTA  
ATTGTCTCTACTTTGTGAGACTACTTTTGAATGCTTGACCTCAAATCAGGTAGGACTACC  
CGCTGAACTTAA

>ABC9-23

TTTCCGTAGGTGAACCTGCGGAAGGATCATTATTGAATTATGTTTCTAGATAGGTTGTAG  
CTGGCTC-TTTAGAGCATGTGCACGCCTGTTTGGACTTCATTTTCATCCACCTGTGCACC  
TATTGTAGTCTTTGGTTGGGTTAGGGGGAAGTGGTCATTGTGTCAGCATCTGCTGGATGT



GAGGACTTGCATTGTGAAAGCTTTGCTGTCCTTGATGTGATCATGGAATCTCTTTCTCAC  
TAGAGTCTATGTCACCTATTATACTCTGTGCAATGTCATTGAATGTCTTTACATGGGCTT  
GTATGCCTATGAAAATTGTAATACAACCTTTCAGCAACGGATCTCTTGGCTCTCGCATCGA  
TGAAGAACGCAGCGAAATGCGATAAGTAATGTGAATTGCAGAATTCAGTGAATCATCGAA  
TCTTTGAACGCATCTTGCGCTCCTTGGTATTCCGAGGAGCATGCCTGTTTGAGTGTCAAT  
AAATTCTCAACTCTCTTATAC-TTTTTTGTAAGAGAGCTTGGACTGTGGAGGCTTGCT  
GGCCACTTTTTGGGGTCAGCTCCTCTGAAATGCATTAGCGGAACCGTTTGCGATCTGCCA  
CAAGTGTGATAAGTTATCTACACTGGCGAGGGGATTGCTCTCTGTAATGTTTCAGCTTCTA  
ATTGTCTCTACTTTGTGAGACTACTTTTGAATGCTTGACCTCAAATCAGGTAGGACTACC  
CGCTGAACTTAA

>ABC11-15

TTTCCGTAGGTGAACCTGCGGAAGGATCATTATTGAATTATGTTTCTAGATAGGTTGTAG  
CTGGCTC-TTLAGAGCATGTGCACGCCTGTTTGGACTTCATTTTCATCCACCTGTGCACC  
TATTGTAGTCTTTGGTTGGGTTAGGGGGAAGTGGTCATTGTGTCAGCATCTGCTGGATGT  
GAGGACTTGCATTGTGAAAGCTTTGCTGTCCTTGATGTGATCATGGAATCTCTTTCTCAC  
TAGAGTCTATGTCACCTATTATACTCTGTGCAATGTCATTGAATGTCTTTACATGGGCTT  
GTATGCCTATGAAAATTGTAATACAACCTTTCAGCAACGGATCTCTTGGCTCTCGCATCGA  
TGAAGAACGCAGCGAAATGCGATAAGTAATGTGAATTGCAGAATTCAGTGAATCATCGAA  
TCTTTGAACGCATCTTGCGCTCCTTGGTATTCCGAGGAGCATGCCTGTTTGAGTGTCAAT  
AAATTCTCAACTCTCTTATAC-TTTTTTGTAAGAGAGCTTGGACTGTGGAGGCTTGCT  
GGCCACTTTTTGGGGTCAGCTCCTCTGAAATGCATTAGCGGAACCGTTTGCGATCTGCCA  
CAAGTGTGATAAGTTATCTACACTGGCGAGGGGATTGCTCTCTGTAATGTTTCAGCTTCTA  
ATTGTCTCTACTTTGTGAGACTACTTTTGAATGCTTGACCTCAAATCAGGTAGGACTACC  
CGCTGAACTTAA

>ABC7-56

TTTCCGTAGGTGAACCTGCGGAAGGATCATTATTGAATTATGTTTCTAGATAGGTTGTAG  
CTGGCTC-TTLAGAGCATGTGCACGCCTGTTTGGACTTCATTTTCATCCACCTGTGCACC  
TATTGTAGTCTTTGGTTGGGTTAGGGGGAAGTGGTCATTGTGTCAGCATCTGCTGGATGT  
GAGGACTTGCATTGTGAAAGCTTTGCTGTCCTTGATGTGATCATGGAATCTCTTTCTCAC  
TAGAGTCTATGTCACCTATTATACTCTGTGCAATGTCATTGAATGTCTTTACATGGGCTT  
GTATGCCTATGAAAATTGTAATACAACCTTTCAGCAACGGATCTCTTGGCTCTCGCATCGA  
TGAAGAACGCAGCGAAATGCGATAAGTAATGTGAATTGCAGAATTCAGTGAATCATCGAA  
TCTTTGAACGCATCTTGCGCTCCTTGGTATTCCGAGGAGCATGCCTGTTTGAGTGTCAAT  
AAATTCTCAACTCTCTTATAC-TTTTTTGTAAGAGAGCTTGGACTGTGGAGGCTTGCT  
GGCCACTTTTTGGGGTCAGCTCCTCTGAAATGCATTAGCGGAACCGTTTGCGATCTGCCA  
CAAGTGTGATAAGTTATCTACACTGGCGAGGGGATTGCTCTCTGTAATGTTTCAGCTTCTA  
ATTGTCTCTACTTTGTGAGACTACTTTTGAATGCTTGACCTCAAATCAGGTAGGACTACC  
CGCTGAACTTAA

>ABC6-6

TTTCCGTAGGTGAACCTGCGGAAGGATCATTATTGAATTATGTTTCTAGATAGGTTGTAG  
CTGGCTC-TTLAGAGCATGTGCACGCCTGTTTGGACTTCATTTTCATCCACCTGTGCACC  
TATTGTAGTCTTTGGTTGGGTTAGGGGGAAGTGGTCATTGTGTCAGCATCTGCTGGATGT  
GAGGACTTGCATTGTGAAAGCTTTGCTGTCCTTGATGTGATCATGGAATCTTTTTCTCAC  
TAGAGTCTATGTCACCTATTATACTCTGTGCAATGTCATTGAATGTCTTTACATGGGCTT  
GTATGCCTATGAAAATTGTAATACAACCTTTCAGCAACGGATCTCTTGGCTCTCGCATCGA  
TGAAGAACGCAGCGAAATGCGATAAGTAATGTGAATTGCAGAATTCAGTGAATCATCGAA  
TCTTTGAACGCATCTTGCGCTCCTTGGTATTCCGAGGAGCATGCCTGTTTGAGTGTCAAT  
AAATTCTCAACTCTCTTATAC-TTTTTTGTAAGAGAGCTTGGACTGTGGAGGCTTGCT  
GGCCACTTTTTGGGGTCAGCTCCTCTGAAATGCATTAGCGGAACCGTTTGCGATCTGCCA  
CAAGTGTGATAAGTTATCTACACTGGCGAGGGGATTGCTCTCTGTAATGTTTCAGCTTCTA



ATTGTCTCTACTTTGTGAGACTACTTTTGAATGCTTGACCTCAAATCAGGTAGGACTACC  
CGCTGAACTTAA

>ABC8-60

TTTCCGTAGGTGAACCTGCGGAAGGATCATTATTGAATTATGTTTCTAGATAGGTTGTAG  
CTGGCTC-TTTAGAGCATGTGCACGCCTGTTTGGACTTCATTTTCATCCACCTGTGCACC  
TATTGTAGTCTTTGGTTGGGTTAGGGGGAAGTGGTCATTGTGTCAGCATCTGCTGGATGT  
GAGGACTTGCATTGTGAAAGCTTTGCTGTCCTTGATGTGATCATGGAATCTTTTTCTCAC  
TAGAGTCTATGTCACTCATTATACTCTGTGCAATGTCATTGAATGTCTTTACATGGGCTT  
GTATGCCTATGAAAATTGTAATAACAACCTTTCAGCAACGGATCTCTTGGCTCTCGCATCGA  
TGAAGAACGCAGCGAAATGCGATAAGTAATGTGAATTGCAGAATTCAGTGAATCATCGAA  
TCTTTGAACGCATCTTGCCTCCTTGGTATTCCGAGGAGCATGCCTGTTTGAGTGTCAAT  
AAATTCTCAACTCTCTTATAC-TTTTTGTAAAAGAGAGCTTGGACTGTGGAGGCTTGCT  
GGCCACTTTTTGGGGTCAGCTCCTCTGAAATGCATTAGCGGAACCGTTTGCGATCTGCCA  
CAAGTGTGATAAGTTATCTACACTGGCGAGGGGATTGCTCTCTGTAATGTTTCAGCTTCTA  
ATTGTCTCTACTTTGTGAGACTACTTTTGAATGCTTGACCTCAAATCAGGTAGGACTACC  
CGCTGAACTTAA

>ABC6-28

TTTCCGTAGGTGAACCTGCGGAAGGATCATTATTGAATTATGTTTCTAGATAGGTTGTAG  
CTGGCTC-TTTAGAGCATGTGCACGCCTGTTTGGACTTCATTTTCATCCACCTGTGCACC  
TATTGTAGTCTTTGGTTGGGTTAGGAGGAAGTGGTCATTGTGTCAGCATCTGCTGGATGT  
GAGGACTTGCATTGTGAAAGCTTTGCTGTCCTTGATGTGATCATGGAATCTTTTTCTCAC  
TAGAGTCTATGTCACTCATTATACTCTGTGCAATGTCATTGAATGTCTTTACATGGGCTT  
GTATGCCTATGAAAATTGTAATAACAACCTTTCAGCAACGGATCTCTTGGCTCTCGCATCGA  
TGAAGAACGCAGCGAAATGCGATAAGTAATGTGAATTGCAGAATTCAGTGAATCATCGAA  
TCTTTGAACGCATCTTGCCTCCTTGGTATTCCGAGGAGCATGCCTGTTTGAGTGTCAAT  
AAATTCTCAACTCTCTTATAC-TTTTTGTAAAAGAGAGCTTGGACTGTGGAGGCTTGCT  
GGCCACTTTTTGGGGTCAGCTCCTCTGAAATGCATTAGCGGAACCGTTTGCGATCTGCCA  
CAAGTGTGATAAGTTATCTACACTGGCGAGGGGATTGCTCTCTGTAATGTTTCAGCTTCTA  
ATTGTCTCTACTTTGTGAGACTACTTTTGAATGCTTGACCTCAAATCAGGTAGGACTACC  
CGCTGAACTTAA

>ABC7-13

TTTCCGTAGGTGAACCTGCGGAAGGATCATTATTGAATTATGTTTCTAGATAGGTTGTAG  
CTGGCTC-TTTAGAGCATGTGCACGCCTGTTTGGACTTCATTTTCATCCACCTGTGCACC  
TATTGTAGTCTTTGGTTGGGTTAGGAGGAAGTGGTCATTGTGTCAGCATCTGCTGGATGT  
GAGGACTTGCATTGTGAAAGCTTTGCTGTCCTTGATGTGATCATGGAATCTTTTTCTCAC  
TAGAGTCTATGTCACTCATTATACTCTGTGCAATGTCATTGAATGTCTTTACATGGGCTT  
GTATGCCTATGAAAATTGTAATAACAACCTTTCAGCAACGGATCTCTTGGCTCTCGCATCGA  
TGAAGAACGCAGCGAAATGCGATAAGTAATGTGAATTGCAGAATTCAGTGAATCATCGAA  
TCTTTGAACGCATCTTGCCTCCTTGGTATTCCGAGGAGCATGCCTGTTTGAGTGTCAAT  
AAATTCTCAACTCTCTTATAC-TTTTTGTAAAAGAGAGCTTGGACTGTGGAGGCTTGCT  
GGCCACTTTTTGGGGTCAGCTCCTCTGAAATGCATTAGCGGAACCGTTTGCGATCTGCCA  
CAAGTGTGATAAGTTATCTACACTGGCGAGGGGATTGCTCTCTGTAATGTTTCAGCTTCTA  
ATTGTCTCTACTTTGTGAGACTACTTTTGAATGCTTGACCTCAAATCAGGTAGGACTACC  
CGCTGAACTTAA

>ABC2-41

TTTCCGTAGGTGAACCTGCGGAAGGATCATTATTGAATTATGTTTCTAGATAGGTTGTAG  
CTGGCTC-TTTAGAGCATGTGCACGCCTGTTTGGACTTCATTTTCATCCACCTGTGCACC  
TATTGTAGTCTTTGGTTGGGTTAGGGGGAAGTGGTCATTGTGTCAGCATCTGCTGGATGT  
GAGGACTTGCATTGTGAAAGCTTTGCTGTCCTTGATGTGATCATGGAATCTCTTTCTCAC  
TAGAGTCTATGTCACTCATTATACTCTGTGCAATGTCATTGAATGTCTTTACATGGGCTT



GTATGCCTATGAAAATTGTAATACAACCTTTTCAGCAACGGATCTCTTGGCTCTCGCATCGA  
TGAAGAACGCAGCGAAATGCGATAAGTAATGTGAATTGCAGAATTCAGTGAATCATCGAA  
TCTTTGAACGCATCTTGCCTCCTTGGTATTCCGAGGAGCATGCCTGTTTGAGTGTCAAT  
AAATTCTCAACTCTCTTATAC-TTTTTTGAAAAGAGAGCTTGGACTGTGGAGGCTTGCT  
GGCCACTTTTTGGGGTCAGCTCCTCTGAAATACATTAGCGGAACCGTTTGCGATCTGCCA  
CAAGTGTGATAAGTTATCTACACTGGCGAGGGGATTGCTCTCTGTAATGTTTCAGCTTCTA  
ATTGTCTCTACTTTGTGAGACTACTTTTGAATGCTTGACCTCAAATCAGGTAGGACTACC  
CGCTGAACTTAA

>ABC10-43

TTTCCGTAGGTGAACCTGCGGAAGGATCATTATTGAATTATGTTTCTAGATAGGTTGTAG  
CTGGCTC-TTTAGAGCATGTGCACGCCTGTTTGGACTTCATTTTCATCCACCTGTGCACC  
TATTGTAGTCTTTGGTTGGGTTAGGAGGAAGTGGTCATTGTGTCAGCATCTGCTGGATGT  
GAGGACTTGCATTGTGAAAGCTTTGCTGTCCTTGATGTGATCATGGAATCTTTTTCTCAC  
TAGAGTCTATGTCACCTCATTATACTCTGTCTGAATGTCATTGAATGTCTTTACATGGGCTT  
ATATGCCTATGAAAATTGTAATACAACCTTTTCAGCAACGGATCTCTTGGCTCTCGCATCGA  
TGAAGAACGCAGCGAAATGCGATAAGTAATGTGAATTGCAGAATTCAGTGAATCATCGAA  
TCTTTGAACGCATCTTGCCTCCTTGGTATTCCGAGGAGCATGCCTGTTTGAGTGTCAAT  
AAATTCTCAACTCTCTTATAC-TTTTTTGAAAAGAGAGCTTGGACTGTGGAGGCTTGCT  
GGCCACTTTTTGGGGTCAGCTCCTCTGAAATGCATTAGCGGAACCGTTTGCGATCTGCCA  
CAAGTGTGATAAGTTATCTACACTGGCGAGGGGATTGCTCTCTGTAATGTTTCAGCTTCTA  
ATTGTCTCTACTTTGTGAGACTACTTTTGAATGCTTGACCTCAAATCAGGTAGGACTACC  
CGCTGAACTTAA

>ABC3-38

TTTCCGTAGGTGAACCTGCGGAAGGATCATTATTGAATTATGTTTCTAGATAGGTTGTAG  
CTGGCTC-TTTAGAGCATGTGCACGCCTGTTTGGACTTCATTTTCATCCACCTGTGCACC  
TATTGTAGTCTTTGGTTGGGTTAGGAGGAAGTGGTCATTGTGTCAGCATCTGCTGGATGT  
GAGGACTTGCATTGTGAAAGCTTTGCTGTCCTTGATGTGATCATGGAATCTCTTTCTCAC  
TAGAGTCTATGTCACCTCATTATACTCTGTCTGAATGTCATTGAATGTCTTTACATGGGCTT  
ATATGCCTATGAAAATTGTAATACAACCTTTTCAGCAACGGATCTCTTGGCTCTCGCATCGA  
TGAAGAACGCAGCGAAATGCGATAAGTAATGTGAATTGCAGAATTCAGTGAATCATCGAA  
TCTTTGAACGCATCTTGCCTCCTTGGTATTCCGAGGAGCATGCCTGTTTGAGTGTCAAT  
AAATTCTCAACTCTCTTATAC-TTTTTTGAAAAGAGAGCTTGGACTGTGGAGGCTTGCT  
GGCCACTTTTTGGGGTCAGCTCCTCTGAAATGCATTAGCGGAACCGTTTGCGATCTGCCA  
CAAGTGTGATAAGTTATCTACACTGGCGAGGGGATTGCTCTCTGTAATGTTTCAGCTTCTA  
ATTGTCTCTACTTTGTGAGACTACTTTTGAATGCTTGACCTCAAATCAGGTAGGACTACC  
CGCTGAACTTAA

>ABC4-15

TTTCCGTAGGTGAACCTGCGGAAGGATCATTATTGAATTATGTTTCTAGATAGGTTGTAG  
CTGGCTC-TTTAGAGCATGTGCACGCCTGTTTGGACTTCATTTTCATCCACCTGTGCACC  
TATTGTAGTCTTTGGTTGGGTTAGGAGGAAGTGGTCATTGTGTCAGCATCTGCTGGATGT  
GAGGACTTGCATTGTGAAAGCTTTGCTGTCCTTGATGTGATCATGGAATCTCTTTCTCAC  
TAGAGTCTATGTCACCTCATTATACTCTGTCTGAATGTCATTGAATGTCTTTACATGGGCTT  
ATATGCCTATGAAAATTGTAATACAACCTTTTCAGCAACGGATCTCTTGGCTCTCGCATCGA  
TGAAGAACGCAGCGAAATGCGATAAGTAATGTGAATTGCAGAATTCAGTGAATCATCGAA  
TCTTTGAACGCATCTTGCCTCCTTGGTATTCCGAGGAGCATGCCTGTTTGAGTGTCAAT  
AAATTCTCAACTCTCTTATAC-TTTTTTGAAAAGAGAGCTTGGACTGTGGAGGCTTGCT  
GGCCACTTTTTGGGGTCAGCTCCTCTGAAATGCATTAGCGGAACCGTTTGCGATCTGCCA  
CAAGTGTGATAAGTTATCTACACTGGCGAGGGGATTGCTCTCTGTAATGTTTCAGCTTCTA  
ATTGTCTCTACTTTGTGAGACTACTTTTGAATGCTTGACCTCAAATCAGGTAGGACTACC  
CGCTGAACTTAA



>ABC5-83

TTTCCGTAGGTGAACCTGCGGAAGGATCATTATTGAATTATGTTTCTAGATAGGTTGTAG  
CTGGCTC-TTTAGAGCATGTGCACGCCTGTTTGGACTTCATTTTCATCCACCTGTGCACC  
TATTGTAGTCTTTGGTTGGGTTAGGAGGAAGTGGTCATTGTGTCAGCATCTGCTGGATGT  
GAGGACTTGCATTGTGAAAGCTTTGCTGTCCTTGATGTGATCATGGAATCTCTTTCTCAC  
TAGAGTCTATGTCACCTCATTATACTCTGTGCGAATGTCATTGAATGTCTTTACATGGGCTT  
ATATGCCTATGAAAATTGTAATACAACCTTTCAGCAACGGATCTCTTGGCTCTCGCATCGA  
TGAAGAACGCAGCGAAATGCGATAAGTAATGTGAATTGCAGAATTCAGTGAATCATCGAA  
TCTTTGAACGCATCTTGCGCTCCTTGGTATTCCGAGGAGCATGCCTGTTTGAGTGTCAAT  
AAATTCTCAACTCTCTTATAC-TTTTTGTAAAAGAGAGCTTGGACTGTGGAGGCTTGCT  
GGCCACTTTTTGGGGTCAGCTCCTCTGAAATGCATTAGCGGAACCGTTTGCGATCTGCCA  
CAAGTGTGATAAGTTATCTACACTGGCGAGGGGATTGCTCTCTGTAATGTTTCAGCTTCTA  
ATTGTCTCTACTTTGTGAGACTACTTTTGAATGCTTGACCTCAAATCAGGTAGGACTACC  
CGCTGAACTTAA

>ABC6-7

TTTCCGTAGGTGAACCTGCGGAAGGATCATTATTGAATTATGTTTCTAGATAGGTTGTAG  
CTGGCTC-TTTAGAGCATGTGCACGCCTGTTTGGACTTCATTTTCATCCACCTGTGCACC  
TATTGTAGTCTTTGGTTGGGTTAGGAGGAAGTGGTCATTGTGTCAGCATCTGCTGGATGT  
GAGGACTTGCATTGTGAAAGCTTTGCTGTCCTTGATGTGATCATGGAATCTCTTTCTCAC  
TAGAGTCTATGTCACCTCATTATACTCTGTGCGAATGTCATTGAATGTCTTTACATGGGCTT  
ATATGCCTATGAAAATTGTAATACAACCTTTCAGCAACGGATCTCTTGGCTCTCGCATCGA  
TGAAGAACGCAGCGAAATGCGATAAGTAATGTGAATTGCAGAATTCAGTGAATCATCGAA  
TCTTTGAACGCATCTTGCGCTCCTTGGTATTCCGAGGAGCATGCCTGTTTGAGTGTCAAT  
AAATTCTCAACTCTCTTATAC-TTTTTGTAAAAGAGAGCTTGGACTGTGGAGGCTTGCT  
GGCCACTTTTTGGGGTCAGCTCCTCTGAAATGCATTAGCGGAACCGTTTGCGATCTGCCA  
CAAGTGTGATAAGTTATCTACACTGGCGAGGGGATTGCTCTCTGTAATGTTTCAGCTTCTA  
ATTGTCTCTACTTTGTGAGACTACTTTTGAATGCTTGACCTCAAATCAGGTAGGACTACC  
CGCTGAACTTAA

>ABC7-22

TTTCCGTAGGTGAACCTGCGGAAGGATCATTATTGAATTATGTTTCTAGATAGGTTGTAG  
CTGGCTC-TTTAGAGCATGTGCACGCCTGTTTGGACTTCATTTTCATCCACCTGTGCACC  
TATTGTAGTCTTTGGTTGGGTTAGGAGGAAGTGGTCATTGTGTCAGCATCTGCTGGATGT  
GAGGACTTGCATTGTGAAAGCTTTGCTGTCCTTGATGTGATCATGGAATCTCTTTCTCAC  
TAGAGTCTATGTCACCTCATTATACTCTGTGCGAATGTCATTGAATGTCTTTACATGGGCTT  
ATATGCCTATGAAAATTGTAATACAACCTTTCAGCAACGGATCTCTTGGCTCTCGCATCGA  
TGAAGAACGCAGCGAAATGCGATAAGTAATGTGAATTGCAGAATTCAGTGAATCATCGAA  
TCTTTGAACGCATCTTGCGCTCCTTGGTATTCCGAGGAGCATGCCTGTTTGAGTGTCAAT  
AAATTCTCAACTCTCTTATAC-TTTTTGTAAAAGAGAGCTTGGACTGTGGAGGCTTGCT  
GGCCACTTTTTGGGGTCAGCTCCTCTGAAATGCATTAGCGGAACCGTTTGCGATCTGCCA  
CAAGTGTGATAAGTTATCTACACTGGCGAGGGGATTGCTCTCTGTAATGTTTCAGCTTCTA  
ATTGTCTCTACTTTGTGAGACTACTTTTGAATGCTTGACCTCAAATCAGGTAGGACTACC  
CGCTGAACTTAA

>ABC8-35

TTTCCGTAGGTGAACCTGCGGAAGGATCATTATTGAATTATGTTTCTAGATAGGTTGTAG  
CTGGCTC-TTTAGAGCATGTGCACGCCTGTTTGGACTTCATTTTCATCCACCTGTGCACC  
TATTGTAGTCTTTGGTTGGGTTAGGAGGAAGTGGTCATTGTGTCAGCATCTGCTGGATGT  
GAGGACTTGCATTGTGAAAGCTTTGCTGTCCTTGATGTGATCATGGAATCTCTTTCTCAC  
TAGAGTCTATGTCACCTCATTATACTCTGTGCGAATGTCATTGAATGTCTTTACATGGGCTT  
ATATGCCTATGAAAATTGTAATACAACCTTTCAGCAACGGATCTCTTGGCTCTCGCATCGA  
TGAAGAACGCAGCGAAATGCGATAAGTAATGTGAATTGCAGAATTCAGTGAATCATCGAA



TCTTTGAACGCATCTTGCGCTCCTTGGTATTCCGAGGAGCATGCCTGTTTGAGTGTCAATT  
AAATTCTCAACTCTCTTATAC-TTTTTGTAAAAGAGAGCTTGGACTGTGGAGGCTTGCT  
GGCCACTTTTTGGGGTCAGCTCCTCTGAAATGCATTAGCGGAACCGTTTGCGATCTGCCA  
CAAGTGTGATAAGTTATCTACACTGGCGAGGGGATTGCTCTCTGTAATGTTTCAGCTTCTA  
ATTGTCTCTACTTTGTGAGACTACTTTTGAATGCTTGACCTCAAATCAGGTAGGACTACC  
CGCTGAACTTAA

>ABC9-28

TTTCCGTAGGTGAACCTGCGGAAGGATCATTATTGAATTATGTTTCTAGATAGGTTGTAG  
CTGGCTC-TTTAGAGCATGTGCACGCCTGTTTGGACTTCATTTTCATCCACCTGTGCACC  
TATTGTAGTCTTTGGTTGGGTTAGGAGGAAGTGGTCATTGTGTCAGCATCTGCTGGATGT  
GAGGACTTGCAATTGTGAAAGCTTTGCTGTCCTTGATGTGATCATGGAATCTCTTTCTCAC  
TAGAGTCTATGTCACCTCATTATACTCTGTGCAATGTCATTGAATGTCTTTACATGGGCTT  
ATATGCCTATGAAAATTGTAATACAACCTTTAGCAACGGATCTCTTGGCTCTCGCATCGA  
TGAAGAACGCAGCGAAATGCGATAAGTAATGTGAATTGCAGAATTCAGTGAATCATCGAA  
TCTTTGAACGCATCTTGCGCTCCTTGGTATTCCGAGGAGCATGCCTGTTTGAGTGTCAATT  
AAATTCTCAACTCTCTTATAC-TTTTTGTAAAAGAGAGCTTGGACTGTGGAGGCTTGCT  
GGCCACTTTTTGGGGTCAGCTCCTCTGAAATGCATTAGCGGAACCGTTTGCGATCTGCCA  
CAAGTGTGATAAGTTATCTACACTGGCGAGGGGATTGCTCTCTGTAATGTTTCAGCTTCTA  
ATTGTCTCTACTTTGTGAGACTACTTTTGAATGCTTGACCTCAAATCAGGTAGGACTACC  
CGCTGAACTTAA

>ABC9-53

TTTCCGTAGGTGAACCTGCGGAAGGATCATTATTGAATTATGTTTCTAGATAGGTTGTAG  
CTGGCTC-TTTAGAGCATGTGCACGCCTGTTTGGACTTCATTTTCATCCACCTGTGCACC  
TATTGTAGTCTTTGGTTGGGTTAGGAGGAAGTGGTCATTGTGTCAGCATCTGCTGGATGT  
GAGGACTTGCAATTGTGAAAGCTTTGCTGTCCTTGATGTGATCATGGAATCTCTTTCTCAC  
TAGAGTCTATGTCACCTCATTATACTCTGTGCAATGTCATTGAATGTCTTTACATGGGCTT  
ATATGCCTATGAAAATTGTAATACAACCTTTAGCAACGGATCTCTTGGCTCTCGCATCGA  
TGAAGAACGCAGCGAAATGCGATAAGTAATGTGAATTGCAGAATTCAGTGAATCATCGAA  
TCTTTGAACGCATCTTGCGCTCCTTGGTATTCCGAGGAGCATGCCTGTTTGAGTGTCAATT  
AAATTCTCAACTCTCTTATAC-TTTTTGTAAAAGAGAGCTTGGACTGTGGAGGCTTGCT  
GGCCACTTTTTGGGGTCAGCTCCTCTGAAATGCATTAGCGGAACCGTTTGCGATCTGCCA  
CAAGTGTGATAAGTTATCTACACTGGCGAGGGGATTGCTCTCTGTAATGTTTCAGCTTCTA  
ATTGTCTCTACTTTGTGAGACTACTTTTGAATGCTTGACCTCAAATCAGGTAGGACTACC  
CGCTGAACTTAA

>ABC11-41

TTTCCGTAGGTGAACCTGCGGAAGGATCATTATTGAATTATGTTTCTAGATAGGTTGTAG  
CTGGCTC-TTTAGAGCATGTGCACGCCTGTTTGGACTTCATTTTCATCCACCTGTGCACC  
TATTGTAGTCTTTGGTTGGGTTAGGAGGAAGTGGTCATTGTGTCAGCATCTGCTGGATGT  
GAGGACTTGCAATTGTGAAAGCTTTGCTGTCCTTGATGTGATCATGGAATCTCTTTCTCAC  
TAGAGTCTATGTCACCTCATTATACTCTGTGCAATGTCATTGAATGTCTTTACATGGGCTT  
ATATGCCTATGAAAATTGTAATACAACCTTTAGCAACGGATCTCTTGGCTCTCGCATCGA  
TGAAGAACGCAGCGAAATGCGATAAGTAATGTGAATTGCAGAATTCAGTGAATCATCGAA  
TCTTTGAACGCATCTTGCGCTCCTTGGTATTCCGAGGAGCATGCCTGTTTGAGTGTCAATT  
AAATTCTCAACTCTCTTATAC-TTTTTGTAAAAGAGAGCTTGGACTGTGGAGGCTTGCT  
GGCCACTTTTTGGGGTCAGCTCCTCTGAAATGCATTAGCGGAACCGTTTGCGATCTGCCA  
CAAGTGTGATAAGTTATCTACACTGGCGAGGGGATTGCTCTCTGTAATGTTTCAGCTTCTA  
ATTGTCTCTACTTTGTGAGACTACTTTTGAATGCTTGACCTCAAATCAGGTAGGACTACC  
CGCTGAACTTAA

>ABC11-54

TTTCCGTAGGTGAACCTGCGGAAGGATCATTATTGAATTATGTTTCTAGATAGGTTGTAG



CTGGCTC-TTTAGAGCATGTGCACGCCTGTTTGGACTTCATTTTCATCCACCTGTGCACC  
TATTGTAGTCTTTGGTTGGGTTAGGAGGAAGTGGTCATTGTGTCAGCATCTGCTGGATGT  
GAGGACTTGCATTGTGAAAGCTTTGCTGTCCTTGATGTGATCATGGAATCTCTTTCTCAC  
TAGAGTCTATGTCACCTATTATACTCTGTGCAATGTCATTGAATGTCTTTACATGGGCTT  
ATATGCCTATGAAAATTGTAATACAACCTTTCAGCAACGGATCTCTTGGCTCTCGCATCGA  
TGAAGAACGCAGCGAAATGCGATAAGTAATGTGAATTGCAGAATTCAGTGAATCATCGAA  
TCTTTGAACGCATCTTGCCTCCTTGGTATTCCGAGGAGCATGCCTGTTTGAGTGTCAAT  
AAATTCTCAACTCTCTTATAC-TTTTTTGTAAGAGAGCTTGGACTGTGGAGGCTTGCT  
GGCCACTTTTTGGGGTCAGCTCCTCTGAAATGCATTAGCGGAACCGTTTGCGATCTGCCA  
CAAGTGTGATAAGTTATCTACACTGGCGAGGGGATTGCTCTCTGTAATGTTGAGCTTCTA  
ATTGTCTCTACTTTGTGAGACTACTTTTGAATGCTTGACCTCAAATCAGGTAGGACTACC  
CGCTGAACTTAA

>ABC8-32

TTTCCGTAGGTGAACCTGCGGAAGGATCATTATTGAATTATGTTTCTAGATAGGTTGTAG  
CTGGCTC-TTTAGAGCATGTGCACGCCTGTTTGGACTTCATTTTCATCCACCTGTGCACC  
TATTGTAGTCTTTGGTTGGGTTAGGAGGAAGTGGTCATTGTGTCAGCATCTGCTGGATGT  
GAGGACTTGCATTGTGAAAGCTTTGCTGTCCTTGATGTGATCATGGAATCTCTTTCTCAC  
TAGAGTCTATGTCACCTATTATACTCTGTGCAATGTCATTGAATGTCTTTACATGGGCTT  
GTATGCCTATGAAAATTGTAATACAACCTTTCAGCAACGGATCTCTTGGCTCTCGCATCGA  
TGAAGAACGCAGCGAAATGCGATAAGTAATGTGAATTGCAGAATTCAGTGAATCATCGAA  
TCTTTGAACGCATCTTGCCTCCTTGGTATTCCGAGGAGCATGCCTGTTTGAGTGTCAAT  
AAATTCTCAACTCTCTTATAC-TTTTTTGTAAGAGAGCTTGGACTGTGGAGGCTTGCT  
GGCCACTTTTTGGGGTCAGCTCCTCTGAAATGCATTAGCGGAACCGTTTGCAATCTGCCA  
CAAGTGTGATAAGTTATCTACACTGGCGAGGGGATTGCTCTCTGTAATGTTGAGCTTCTA  
ATTGTCTCTACTTTGTGAGACTACTTTTGAATGCTTGACCTCAAATCAGGTAGGACTACC  
CGCTGAACTTAA

>ABC9-18

TTTCCGTAGGTGAACCTGCGGAAGGATCATTATTGAATTATGTTTCTAGATAGGTTGTAG  
CTGGCTC-TTTAGAGCATGTGCACGCCTGTTTGGACTTCATTTTCATCCACCTGTGCACC  
TATTGTAGTCTTTGGTTGGGTTAGGAGGAAGTGGTCATTGTGTCAGCATCTGCTGGATGT  
GAGGACTTGCATTGTGAAAGCTTTGCTGTCCTTGATGTGATCATGGAATCTCTTTCTCAC  
TAGAGTCTATGTCACCTATTATACTCTGTGCAATGTCATTGAATGTCTTTACATGGGCTT  
ATATGCCTATGAAAATTGTAATACAACCTTTCAGCAACGGATCTCTTGGCTCTCGCATCGA  
TGAAGAACGCAGCGAAATGCGATAAGTAATGTGAATTGCAGAATTCAGTGAATCATCGAA  
TCTTTGAACGCATCTTGCCTCCTTGGTATTCCGAGGAGCATGCCTGTTTGAGTGTCAAT  
AAATTCTCAACTCTCTTATAC-TTTTTTGTAAGAGAGCTTGGACTGTGGAGGCTTGCT  
GGCCACTTTTTGGGGTCAGCTCCTCTGAAATGCATTAGCGGAACCGTTTGCAATCTGCCA  
CAAGTGTGATAAGTTATCTACACTGGCGAGGGGATTGCTCTCTGTAATGTTGAGCTTCTA  
ATTGTCTCTACTTTGTGAGACTACTTTTGAATGCTTGACCTCAAATCAGGTAGGACTACC  
CGCTGAACTTAA

>ABC4-2

TTTCCGTAGGTGAACCTGCGGAAGGATCATTATTGAATTATGTTTCTAGATAGGTTGTAG  
CTGGCTC-TTTAGAGCATGTGCACGCCTGTTTGGACTTCATTTTCATCCACCTGTGCACC  
TATTGTAGTCTTTGGTTGGGTTAGGAGGAAGTGGTCATTGTGTCAGCATCTGCTGGATGT  
GAGGACTTGCATTGTGAAAGCTTTGCTGTCCTTGATGTGATCATGGAATCTCTTTCTCAC  
TAGAGTCTATGTCACCTATTATACTCTGTGCAATGTCATTGAATGTCTTTACATGGGCTT  
GTATGCCTATGAAAATTGTAATACAACCTTTCAGCAACGGATCTCTTGGCTCTCGCATCGA  
TGAAGGACGCAGCGAAATGCGATAAGTAATGTGAATTGCAGAATTCAGTGAATCATCGAA  
TCTTTGAACGCATCTTGCCTCCTTGGTATTCCGAGGAGCATGCCTGTTTGAGTGTCAAT  
AAATTCTCAACTCTCTTATAC-TTTTTTGTAAGAGAGCTTGGACTGTGGAGGCTTGCT



GGCCACTTTTTGGGGTCAGCTCCTCTGAAATGCATTAGCGGAACCGTTTGCGATCTGCCA  
CAAGTGTGATAAGTTATCTACACTGGCGAGGGGATTGCTCTCTGTAATGTTGAGCTTCTA  
ATTGTCTCTACTTTGTGAGACTACTTTTGAATGCTTGACCTCAAATCAGGTAGGACTACC  
CGCTGAACTTAA

>ABC11-38

TTTCCGTAGGTGAACCTGCGGAAGGATCATTATTGAATTATGTTTCTAGATAGGTTGTAG  
CTGGCTC-TTTAGAGCATGTGCACGCCTGTTTGGACTTCATTTTCATCCACCTGTGCACC  
TATTGTAGTCTTTGGTTGGGTTAGGAGGAAGTGGTCATTGTGTCAGCATCTGCTGGATGT  
GAGGACTTGCATTGTGAAAGCTTTGCTGTCCTTGATGTGATCATGGAATCTCTTTCTCAC  
TAGAGTCTATGTCACTCATTATACTCTGTGCAATGTCATTGAATGTCTTTACATGGGCTT  
GTATGCCTATGAAAATTGTAATAACAACCTTTCAGCAACGGATCTCTTGGCTCTCGCATCGA  
TGAAGGACGCAGCGAAATGCGATAAGTAATGTGAATTGCAGAATTCAGTGAATCATCGAA  
TCTTTGAACGCATCTTGCGCTCCTTGGTATTCCGAGGAGCATGCCTGTTTGAGTGTGATT  
AAATTCTCAACTCTCTTATAC-TTTTTGTAAAAGAGAGCTTGGACTGTGGAGGCTTGCT  
GGCCACTTTTTGGGGTCAGCTCCTCTGAAATGCATTAGCGGAACCGTTTGCGATCTGCCA  
CAAGTGTGATAAGTTATCTACACTGGCGAGGGGATTGCTCTCTGTAATGTTGAGCTTCTA  
ATTGTCTCTACTTTGTGAGACTACTTTTGAATGCTTGACCTCAAATCAGGTAGGACTACC  
CGCTGAACTTAA

>ABC8-12

TTTCCGTAGGTGAACCTGCGGAAGGATCATTATTGAATTATGTTTCTAGATAGGTTGTAG  
CTGGCTC-TTTAGAGCATGTGCACGCCTGTTTGGACTTCATTTTCATCCACCTGTGCACC  
TATTGTAGTCTTTGGTTGGGTTAGGAGGAAGTGGTCATTGTGTCAGCATCTGCTGGATGT  
GAGGACTTGCATTGTGAAAGCTTTGCTGTCCTTGATGTGATCATGGAATCTCTTTCTCAC  
TAGAGTCTATGTCACTCATTATACTCTGTGCAATGTCATTGAATGTCTTTACATGGGCTT  
ATATGCCTATGAAAATTGTAATAACAACCTTTCAGCAACGGATCTCTTGGCTCTCGCATCGA  
TGAAGGACGCAGCGAAATGCGATAAGTAATGTGAATTGCAGAATTCAGTGAATCATCGAA  
TCTTTGAACGCATCTTGCGCTCCTTGGTATTCCGAGGAGCATGCCTGTTTGAGTGTGATT  
AAATTCTCAACTCTCTTATAC-TTTTTGTAAAAGAGAGCTTGGACTGTGGAGGCTTGCT  
GGCCACTTTTTGGGGTCAGCTCCTCTGAAATGCATTAGCGGAACCGTTTGCGATCTGCCA  
CAAGTGTGATAAGTTATCTACACTGGCGAGGGGATTGCTCTCTGTAATGTTGAGCTTCTA  
ATTGTCTCTACTTTGTGAGACTACTTTTGAATGCTTGACCTCAAATCAGGTAGGACTACC  
CGCTGAACTTAA

>ABC4-22

TTTCCGTAGGTGAACCTGCGGAAGGATCATTATTGAATTATGTTTCTAGATAGGTTGTAG  
CTGGCTC-TTTAGAGCATGTGCACGCCTGTTTGGACTTCATTTTCATCCACCTGTGCACC  
TATTGTAGTCTTTGGTTGGGTTAGGAGGAAGTGGTCATTGTGTCAGCATCTGCTGGATGT  
GAGGACTTGCATTGTGAAAGCTTTGCTGTCCTTGATGTGATCATGGAATCTCTTTCTCAC  
TAGAGTCTATGTCACTCATTATACTCTGTGCAATGTCATTGAATGTCTTTACATGGGCTT  
ATATGCCTATGAAAATTGTAATAACAACCTTTCAGCAACGGATCTCTTGGCTCTCGCATCGA  
TGAAGGACGCAGCGAAATGCGATAAGTAATGTGAATTGCAGAATTCAGTGAATCATCGAA  
TCTTTGAACGCATCTTGCGCTCCTTGGTATTCCGAGGAGCATGCCTGTTTGAGTGTGATT  
AAATTCTCAACTCTCTTATAC-TTTTTGTAAAAGAGAGCTTGGACTGTGGAGGCTTGCT  
GGCCACTTTTTGGGGTCAGCTCCTCTGAAATGCATTAGCGGAACCGTTTGCGATCTGCCA  
CAAGTGTGATAAGTTATCTACACTGGCGAGGGGATTGCTCTCTGTAATGTTGAGCTTCTA  
ATTGTCTCTACTTTGTGAGACTACTTTTGAATGCTTGACCTCAAATCAGGTAGGACTACC  
CGCTGAACTTAA

>ABC11-21

TTTCCGTAGGTGAACCTGCGGAAGGATCATTATTGAATTATGTTTCTAGATAGGTTGTAG  
CTGGCTC-TTTAGAGCATGTGCACGCCTGTTTGGACTTCATTTTCATCCACCTGTGCACC  
TATTGTAGTCTTTGGTTGGGTTAGGAGGAAGTGGTCATTGTGTCAGCATCTGCTGGATGT



GAGGACTTGCATTGTGAAAGCTTTGCTGTCCTTGATGTGATCATGGAATCTTTTTCTCAC  
TAGAGTCTATGTCACCTATTATACTCTGTGCAATGTCATTGAATGTCTTTACATGGGCTT  
GTATGCCTATGAAAATTGTAATACAACCTTTCAGCAACGGATCTCTTGGCTCTCGCATCGA  
TGAAGGACGCAGCGAAATGCGATAAGTAATGTGAATTGCAGAATTCAGTGAATCATCGAA  
TCTTTGAACGCATCTTGCGCTCCTTGGTATTCCGAGGAGCATGCCTGTTTGAGTGTCAAT  
AAATTCTCAACTCTCTTATAC-TTTTTGTAAAAGAGAGCTTGGACTGTGGAGGCTTGCT  
GGCCACTTTTTGGGGTCAGCTCCTCTGAAATGCATTAGCGGAACCGTTTGCGATCTGCCA  
CAAGTGTGATAAGTTATCTACACTGGCGAGGGGATTGCTCTCTGTAATGTTTCAGCTTCTA  
ATTGTCTCTACTTTGTGAGACTACTTTTGAATGCTTGACCTCAAATCAGGTAGGACTACC  
CGCTGAACTTAA

>ABC6-19

TTTCCGTAGGTGAACCTGCGGAAGGATCATTATTGAATTATGTTTCTAGATAGGTTGTAG  
CTGGCTC-TTLAGAGCATGTGCACGCCTGTTTGGACTTCATTTTCATCCACCTGTGCACC  
TATTGTAGTCTTTGGTTGGGTTAGGGGGAAGTGGTCATTGTGTCAGCATCTGCTGGATGT  
GAGGACTTGCATTGTGAAAGCTTTGCTGTCCTTGATGTGATCATGGAATCTTTTTCTCAC  
TAGAGTCTATGTCACCTATTATACTCTGTGCAATGTCATTGAATGTCTTTACATGGGCTT  
GTATGCCTATGAAAATTGTAATACAACCTTTCAGCAACGGATCTCTTGGCTCTCGCATCGA  
TGAAGAACGCAGCGAAATGCGATAAGTAATGTGAATTGCAGAATTCAGTGAATCATCGAA  
TCTTTGAACGCATCTTGCGCTCCTTGGTATTCCGAGGAGCATGCCTGTTTGAGTGTCAAT  
AAATTCTCAACTCTCTTATAC-TTTTTGTAAAAGAGAGCTTGGACTGTGGAGGCTTGCT  
GACCACTTTTTGGGGTCAGCTCCTCTGAAATGCATTAGCGGAACCGTTTGCGATCTGCCA  
CAAGTGTGATAAGTTATCTACACTGGCGAGGGGATTGCTCTCTGTAATGTTTCAGCTTCTA  
ATTGTCTCTACTTTGTGAGACTACTTTTGAATGCTTGACCTCAAATCAGGTAGGACTACC  
CGCTGAACTTAA

>ABC2-70

TTTCCGTAGGTGAACCTGCGGAAGGATCATTATTGAATTATGTTTCTAGATAGGTTGTAG  
CTGGCTC-TTLAGAGCATGTGCACGCCTGTTTGGACTTCATTTTCATCCACCTGTGCACC  
TATTGTAGTCTTTGGTTGGGTTAGGAGGAAGTGTATCAGCATCTGCTGGATGT  
GAGGACTTGCATTGTGAAAGCTTTGCTGTCCTTGATGTGATCATGGAATCTCTTTCTCAC  
TAGAGTCTATGTCACCTATTATACTCTGTGCAATGTCATTGAATGTCTTTACATGGGCTT  
GTATGCCTATGAAAATTGTAATACAACCTTTCAGCAACGGATCTCTTGGCTCTCGCATCGA  
TGAAGAACGCAGCGAAATGCGATAAGTAATGTGAATTGCAGAATTCAGTGAATCATCGAA  
TCTTTGAACGCATCTTGCGCTCCTTGGTATTCCGAGGAGCATGCCTGTTTGAGTGTCAAT  
AAATTCTCAACTCTCTTATAC-TTTTTGTAAAAGAGAGCTTGGACTGTGGAGGCTTGCT  
GGCCACTTTTTGGGGTCAGCTCCTCTGAAATGCATTAGCGGAACCGTTTGCGATCTGCCA  
CAAGTGTGATAAGTTATCTACACTGGCGAGGGGATTGCTCTCTGTAATGTTTCAGCTTCTA  
ATTGTCTCTACTTTGTGAGACTACTTTTGAATGCTTGACCTCAAATCAGGTAGGACTACC  
CGCTGAACTTAA

>ABC2-22

TTTCCGTAGGTGAACCTGCGGAAGGATCATTATTGAATTATGTTTCTAGATAGGTTGTAG  
CTGGCTC-TTLAGAGCATGTGCACGCCTGTTTGGACTTCATTTTCATCCACCTGTGCACC  
TATTGTAGTCTTTGGTTGGGTTAGGAGGAAGTGTATCAGCATCTGCTGGGAGT  
GAGGACTTGCATTGTGAAAGCTTTGCTGTCCTTGATGTGATCATGGAATCTTTTTCTCAC  
TAGAGTCTATGTCACCTATTATACTCTGTGCAATGTCATTGAATGTCTTTACATGGGCTT  
GTATGCCTATGAAAATTGTAATACAACCTTTCAGCAACGGATCTCTTGGCTCTCGCATCGA  
TGAAGAACGCAGCGAAATGCGATAAGTAATGTGAATTGCAGAATTCAGTGAATCATCGAA  
TCTTTGAACGCATCTTGCGCTCCTTGGTATTCCGAGGAGCATGCCTGTTTGAGTGTCAAT  
AAATTCTCAACTCTCTTATAC-TTTTTGTAAAAGAGAGCTTGGACTGTGGAGGCTTGCT  
GGCCACTTTTTGGGGTCAGCTCCTCTGAAATGCATTAGCGGAACCGTTTGCGATCTGCCA  
CAAGTGTGATAAGTTATCTACACTGGCGAGGGGATTGCTCTCTGTAATGTTTCAGCTTCTA



ATTGTCTCTACTTTGTGAGACTACTTTTGAATGCTTGACCTCAAATCAGGTAGGACTACC  
CGCTGAACTTAA

>ABC3-24

TTTCCGTAGGTGAACCTGCGGAAGGATCATTATTGAATTATGTTTCTAGATAGGTTGTAG  
CTGGCTC-TTTAGAGCATGTGCACGCCTGTTTGGACTTCATTTTCATCCACCTGTGCACC  
TATTGTAGTCTTTGGTTGGGTTAGGAGGAAGTGATCATTGTATCAGCATCTGCTGGGAGT  
GAGGACTTGCATTGTGAAAGCTTTGCTGTCCTTGATGTGATCATGGAATCTTTTTCTCAC  
TAGAGTCTATGTCACTCATTATACTCTGTGCAATGTCATTGAATGTCTTTACATGGGCTT  
GTATGCCTATGAAAATTGTAATACAACCTTTCAGCAACGGATCTCTTGGCTCTCGCATCGA  
TGAAGAACGCAGCGAAATGCGATAAGTAATGTGAATTGCAGAATTCAGTGAATCATCGAA  
TCTTTGAACGCATCTTGCCTCCTTGGTATTCCGAGGAGCATGCCTGTTTGAGTGTCAAT  
AAATTCTCAACTCTCTTATAC-TTTTTGTAAAAGAGAGCTTGGACTGTGGAGGCTTGCT  
GGCCACTTTTTGGGGTCAGCTCCTCTGAAATGCATTAGCGGAACCGTTTGCGATCTGCCA  
CAAGTGTGATAAGTTATCTACACTGGCGAGGGGATTGCTCTCTGTAATGTTTCAGCTTCTA  
ATTGTCTCTACTTTGTGAGACTACTTTTGAATGCTTGACCTCAAATCAGGTAGGACTACC  
CGCTGAACTTAA

>ABC7-57

TTTCCGTAGGTGAACCTGCGGAAGGATCATTATTGAATTATGTTTCTAGATAGGTTGTAG  
CTGGCTC-TTTAGAGCATGTGCACGCCTGTTTGGACTTCATTTTCATCCACCTGTGCACC  
TATTGTAGTCTTTGGTTGGGTTAGGAGGAAGTGATCATTGTATCAGCATCTGCTGGGAGT  
GAGGACTTGCATTGTGAAAGCTTTGCTGTCCTTGATGTGATCATGGAATCTTTTTCTCAC  
TAGAGTCTATGTCACTCATTATACTCTGTGCAATGTCATTGAATGTCTTTACATGGGCTT  
GTATGCCTATGAAAATTGTAATACAACCTTTCAGCAACGGATCTCTTGGCTCTCGCATCGA  
TGAAGAACGCAGCGAAATGCGATAAGTAATGTGAATTGCAGAATTCAGTGAATCATCGAA  
TCTTTGAACGCATCTTGCCTCCTTGGTATTCCGAGGAGCATGCCTGTTTGAGTGTCAAT  
AAATTCTCAACTCTCTTATAC-TTTTTGTAAAAGAGAGCTTGGACTGTGGAGGCTTGCT  
GGCCACTTTTTGGGGTCAGCTCCTCTGAAATGCATTAGCGGAACCGTTTGCGATCTGCCA  
CAAGTGTGATAAGTTATCTACACTGGCGAGGGGATTGCTCTCTGTAATGTTTCAGCTTCTA  
ATTGTCTCTACTTTGTGAGACTACTTTTGAATGCTTGACCTCAAATCAGGTAGGACTACC  
CGCTGAACTTAA

>ABC9-52

TTTCCGTAGGTGAACCTGCGGAAGGATCATTATTGAATTATGTTTCTAGATAGGTTGTAG  
CTGGCTC-TTTAGAGCATGTGCACGCCTGTTTGGACTTCATTTTCATCCACCTGTGCACC  
TATTGTAGTCTTTGGTTGGGTTAGGAGGAAGTGATCATTGTATCAGCATCTGCTGGGAGT  
GAGGACTTGCATTGTGAAAGCTTTGCTGTCCTTGATGTGATCATGGAATCTTTTTCTCAC  
TAGAGTCTATGTCACTCATTATACTCTGTGCAATGTCATTGAATGTCTTTACATGGGCTT  
GTATGCCTATGAAAATTGTAATACAACCTTTCAGCAACGGATCTCTTGGCTCTCGCATCGA  
TGAAGAACGCAGCGAAATGCGATAAGTAATGTGAATTGCAGAATTCAGTGAATCATCGAA  
TCTTTGAACGCATCTTGCCTCCTTGGTATTCCGAGGAGCATGCCTGTTTGAGTGTCAAT  
AAATTCTCAACTCTCTTATAC-TTTTTGTAAAAGAGAGCTTGGACTGTGGAGGCTTGCT  
GGCCACTTTTTGGGGTCAGCTCCTCTGAAATGCATTAGCGGAACCGTTTGCGATCTGCCA  
CAAGTGTGATAAGTTATCTACACTGGCGAGGGGATTGCTCTCTGTAATGTTTCAGCTTCTA  
ATTGTCTCTACTTTGTGAGACTACTTTTGAATGCTTGACCTCAAATCAGGTAGGACTACC  
CGCTGAACTTAA

>ABC12-19

TTTCCGTAGGTGAACCTGCGGAAGGATCATTATTGAATTATGTTTCTAGATAGGTTGTAG  
CTGGCTC-TTTAGAGCATGTGCACGCCTGTTTGGACTTCATTTTCATCCACCTGTGCACC  
TATTGTAGTCTTTGGTTGGGTTAGGAGGAAGTGATCATTGTATCAGCATCTGCTGGGAGT  
GAGGACTTGCATTGTGAAAGCTTTGCTGTCCTTGATGTGATCATGGAATCTTTTTCTCAC  
TAGAGTCTATGTCACTCATTATACTCTGTGCAATGTCATTGAATGTCTTTACATGGGCTT



GTATGCCTATGAAAATTGTAATACAACCTTTTCAGCAACGGATCTCTTGGCTCTCGCATCGA  
TGAAGAACGCAGCGAAATGCGATAAGTAATGTGAATTGCAGAATTCAGTGAATCATCGAA  
TCTTTGAACGCATCTTGCCTCCTTGGTATTCCGAGGAGCATGCCTGTTTGAGTGTCAAT  
AAATTCTCAACTCTCTTATAC-TTTTTTGAAAAGAGAGCTTGGACTGTGGAGGCTTGCT  
GGCCACTTTTTGGGGTCAGCTCCTCTGAAATGCATTAGCGGAACCGTTTGCGATCTGCCA  
CAAGTGTGATAAGTTATCTACACTGGCGAGGGGATTGCTCTCTGTAATGTTTCAGCTTCTA  
ATTGTCTCTACTTTGTGAGACTACTTTTGAATGCTTGACCTCAAATCAGGTAGGACTACC  
CGCTGAACTTAA

>ABC2-29

TTTCCGTAGGTGAACCTGCGGAAGGATCATTATTGAATTATGTTTCTAGATAGGTTGTAG  
CTGGCTC-TTLAGAGCATGTGCACGCCTGTTTGGACTTCATTTTCATCCACCTGTGCACC  
TATTGTAGTCTTTGGTTGGGTTAGGAGGAAGTGATCATTGTATCAGCATCTGCTGGGAGT  
GAGGACTTGCATTGTGAAAGCTTTGCTGTCCTTGATGTGATCATGGAATCTTTTTCTCAC  
TAGAGTCTATGTCACCTCATTATACTCTGTCTGAATGTCATTGAATGTCTTTACATGGGCTT  
ATATGCCTATGAAAATTGTAATACAACCTTTTCAGCAACGGATCTCTTGGCTCTCGCATCGA  
TGAAGAACGCAGCGAAATGCGATAAGTAATGTGAATTGCAGAATTCAGTGAATCATCGAA  
TCTTTGAACGCATCTTGCCTCCTTGGTATTCCGAGGAGCATGCCTGTTTGAGTGTCAAT  
AAATTCTCAACTCTCTTATAC-TTTTTTGAAAAGAGAGCTTGGACTGTGGAGGCTTGCT  
GGCCACTTTTTGGGGTCAGCTCCTCTGAAATGCATTAGCGGAACCGTTTGCGATCTGCCA  
CAAGTGTGATAAGTTATCTACACTGGCGAGGGGATTGCTCTCTGTAATGTTTCAGCTTCTA  
ATTGTCTCTACTTTGTGAGACTACTTTTGAATGCTTGACCTCAAATCAGGTAGGACTACC  
CGCTGAACTTAA

>ABC12-42

TTTCCGTAGGTGAACCTGCGGAAGGATCATTATTGAATTATGTTTCTAGATAGGTTGTAG  
CTGGCTC-TTLAGAGCATGTGCACGCCTGTTTGGACTTCATTTTCATCCACCTGTGCACC  
TATTGTAGTCTTTGGTTGGGTTAGGAGGAAGTGATCATTGTATCAGCATCTGCTGGGAGT  
GAGGACTTGCATTGTGAAAGCTTTGCTGTCCTTGATGTGATCATGGAATCTTTTTCTCAC  
TAGAGTCTATGTCACCTCATTATACTCTGTCTGAATGTCATTGAATGTCTTTACATGGGCTT  
ATATGCCTATGAAAATTGTAATACAACCTTTTCAGCAACGGATCTCTTGGCTCTCGCATCGA  
TGAAGAACGCAGCGAAATGCGATAAGTAATGTGAATTGCAGAATTCAGTGAATCATCGAA  
TCTTTGAACGCATCTTGCCTCCTTGGTATTCCGAGGAGCATGCCTGTTTGAGTGTCAAT  
AAATTCTCAACTCTCTTATAC-TTTTTTGAAAAGAGAGCTTGGACTGTGGAGGCTTGCT  
GGCCACTTTTTGGGGTCAGCTCCTCTGAAATGCATTAGCGGAACCGTTTGCGATCTGCCA  
CAAGTGTGATAAGTTATCTACACTGGCGAGGGGATTGCTCTCTGTAATGTTTCAGCTTCTA  
ATTGTCTCTACTTTGTGAGACTACTTTTGAATGCTTGACCTCAAATCAGGTAGGACTACC  
CGCTGAACTTAA

>ABC2-27

TTTCCGTAGGTGAACCTGCGGAAGGATCATTATTGAATTATGTTTCTAGATAGGTTGTAG  
CTGGCTC-TTLAGAGCATGTGCACGCCTGTTTGGACTTCATTTTCATCCACCTGTGCACC  
TATTGTAGTCTTTGGTTGGGTTAGGAGGAAGTGATCATTGTATCAGCATCTGCTGGGAGT  
GAGGACTTGCATTGTGAAAGCTTTGCTGTCCTTGATGTGATCATGGAATCTTTTTCTCAC  
TAGAGTCTATGTCACCTCATTATACTCTGTCTGAATGTCATTGAATGTCTTTACATGGGCTT  
ATATGCCTATGAAAATTGTAATACAACCTTTTCAGCAACGGATCTCTTGGCTCTCGCATCGA  
TGAAGAACGCAGCGAAATGCGATAAGTAATGTGAATTGCAGAATTCAGTGAATCATCGAA  
TCTTTGAACGCATCTTGCCTCCTTGGTATTCCGAGGAGCATGCCTGTTTGAGTGTCAAT  
AAATTCTCAACTCTCTTATAC-TTTTTTGAAAAGAGAGCTTGGACTGTGGAGGCTTGCT  
GGCCACTTTTTGGGGTCAGCTCCTCTGAAATGCATTAGCGGAACCGTTTGCGATCTGCCA  
CAAGTGTGATAAGTTATCTACACTGGCGAGGGGATTGCTCTCTGTAATGTTTCAGCTTCTA  
ATTGTCTCTACTTTGTGAGACTACTTTTGAATGCTTGACCTCAAATCAGGTAGGACTACC  
CGCTGAACTTAA



>ABC5-67

TTTCCGTAGGTGAACCTGCGGAAGGATCATTATTGAATTATGTTTCTAGATAGGTTGTAG  
CTGGCTC-TTTAGAGCATGTGCACGCCTGTTTGGACTTCATTTTCATCCACCTGTGCACC  
TATTGTAGTCTTTGGTTGGGTTAGGAGGAAGTGATCATTGTATCAGCATCTGCTGGGAGT  
GAGGACTTGCATTGTGAAAGCTTTGCTGTCCTTGATGTGATCATGGAATCTCTTTCTCAC  
TAGAGTCTATGTCACCTCATTATACTCTGTGCGAATGTCATTGAATGTCTTTACATGGGCTT  
GTATGCCTATGAAAATTGTAATACAACCTTTCAGCAACGGATCTCTTGGCTCTCGCATCGA  
TGAAGAACGCAGCGAAATGCGATAAGTAATGTGAATTGCAGAATTCAGTGAATCATCGAA  
TCTTTGAACGCATCTTGCGCTCCTTGGTATTCCGAGGAGCATGCCTGTTTGAGTGTCAAT  
AAATTCTCAACTCTCTTATAC-TTTTTGTAAAAGAGAGCTTGGACTGTGGAGGCTTGCT  
GGCCACTTTTTGGGGTCAGCTCCTCTGAAATGCATTAGCGGAACCGTTTGCGATCTGCCA  
CAAGTGTGATAAGTTATCTACACTGGCGAGGGGATTGCTCTCTGTAATGTTTCAGCTTCTA  
ATTGTCTCTACTTTGTGAGACTACTTTTGAATGCTTGACCTCAAATCAGGTAGGACTACC  
CGCTGAACTTAA

>ABC8-13

TTTCCGTAGGTGAACCTGCGGAAGGATCATTATTGAATTATGTTTCTAGATAGGTTGTAG  
CTGGCTC-TTTAGAGCATGTGCACGCCTGTTTGGACTTCATTTTCATCCACCTGTGCACC  
TATTGTAGTCTTTGGTTGGGTTAGGAGGAAGTGATCATTGTATCAGCATCTGCTGGGAGT  
GAGGACTTGCATTGTGAAAGCTTTGCTGTCCTTGATGTGATCATGGAATCTTTTTCTCAC  
TAGAGTCTATGTCACCTCATTATACTCTGTGCGAATGTCATTGAATGTCTTTACATGGGCTT  
GTATGCCTATGAAAATTGTAATACAACCTTTCAGCAACGGATCTCTTGGCTCTCGCATCGA  
TGAAGGACGCAGCGAAATGCGATAAGTAATGTGAATTGCAGAATTCAGTGAATCATCGAA  
TCTTTGAACGCATCTTGCGCTCCTTGGTATTCCGAGGAGCATGCCTGTTTGAGTGTCAAT  
AAATTCTCAACTCTCTTATAC-TTTTTGTAAAAGAGAGCTTGGACTGTGGAGGCTTGCT  
GGCCACTTTTTGGGGTCAGCTCCTCTGAAATGCATTAGCGGAACCGTTTGCGATCTGCCA  
CAAGTGTGATAAGTTATCTACACTGGCGAGGGGATTGCTCTCTGTAATGTTTCAGCTTCTA  
ATTGTCTCTACTTTGTGAGACTACTTTTGAATGCTTGACCTCAAATCAGGTAGGACTACC  
CGCTGAACTTAA

>ABC10-19

TTTCCGTAGGTGAACCTGCGGAAGGATCATTATTGAATTATGTTTCTAGATAGGTTGTAG  
CTGGCTC-TTTAGAGCATGTGCACGCCTGTTTGGACTTCATTTTCATCCACCTGTGCACC  
TATTGTAGTCTTTGGTTGGGTTAGGAGGAAGTGATCATTGTATCAGCATCTGCTGGGAGT  
GAGGACTTGCATTGTGAAAGCTTTGCTGTCCTTGATGTGATCATGGAATCTTTTTCTCAC  
TAGAGTCTATGTCACCTCATTATACTCTGTGCGAATGTCATTGAATGTCTTTACATGGGCTT  
GTATGCCTATGAAAATTGTAATACAACCTTTCAGCAACGGATCTCTTGGCTCTCGCATCGA  
TGAAGAACGCAGCGAAATGCGATAAGTAATGTGAATTGCAGAATTCAGTGAATCATCGAA  
TCTTTGAACGCATCTTGCGCTCCTTGGTATTCCGAGGAGCATGCCTGTTTGAGTGTCAAT  
AAATTCTCAACTCTCTTATAC-TTTTTGTAAAAGAGAGCTTGGACTGTGGAGGCTTGCT  
GGCCACTTTTTGGGGTCAGCTCCTCTGAAATGCATTAGCGGAACCGTTTGCAATCTGCCA  
CAAGTGTGATAAGTTATCTACACTGGCGAGGGGATTGCTCTCTGTAATGTTTCAGCTTCTA  
ATTGTCTCTACTTTGTGAGACTACTTTTGAATGCTTGACCTCAAATCAGGTAGGACTACC  
CGCTGAACTTAA

>ABC3-65

TTTCCGTAGGTGAACCTGCGGAAGGATCATTATTGAATTATGTTTCTAGATAGGTTGTAG  
CTGGCTC-TTTAGAGCATGTGCACGCCTGTTTGGACTTCATTTTCATCCACCTGTGCACC  
TATTGTAGTCTTTGGTTGGGTTAGGAGGAAGTGATCATTGTATCAGCATCTGCTGGGAGT  
GAGGACTTGCATTGTGAAAGCTTTGCTGTCCTTGATGTGATCATGGAATCTCTTTCTCAC  
TAGAGTCTATGTCACCTCATTATACTCTGTGCGAATGTCATTGAATGTCTTTACATGGGCTT  
ATATGCCTATGAAAATTGTAATACAACCTTTCAGCAACGGATCTCTTGGCTCTCGCATCGA  
TGAAGAACGCAGCGAAATGCGATAAGTAATGTGAATTGCAGAATTCAGTGAATCATCGAA



TCTTTGAACGCATCTTGCGCTCCTTGGTATTCCGAGGAGCATGCCTGTTTGAGTGTCAATT  
AAATTCTCAACTCTCTTATAC-TTTTTGTAAAAGAGAGCTTGGACTGTGGAGGCTTGCT  
GGCCACTTTTTGGGGTCAGCTCCTCTGAAATGCATTAGCGGAACCGTTTGCAATCTGCCA  
CAAGTGTGATAAGTTATCTACACTGGCGAGGGGATTGCTCTCTGTAATGTTTCACTTCTA  
ATTGTCTCTACTTTGTGAGACTACTTTTGAATGCTTGACCTCAAATCAGGTAGGACTACC  
CGCTGAACTTAA

>ABC2-36

TTTCCGTAGGTGAACCTGCGGAAGGATCATTATTGAATTATGTTTCTAGATAGGTTGTAG  
CTGGCTC-TTTAGAGCATGTGCACGCCTGTTTGGACTTCATTTTCATCCACCTGTGCACC  
TATTGTAGTCTTTGGTTGGGTTAGGAGGAAGTGATCATTGTATCAGCATCTGCTGGGAGT  
GAGGACTTGCAATTGTGAAAGCTTTGCTGTCTTGATGTGATCATGGAATCTTTTCTCAC  
TAGAGTCTATGTCACTCATTATACTCTGTGCAATGTCATTGAATGTCTTTACATGGGCTT  
GTATGCCTATGAAAATTGTAATACAACCTTTCAGCAACGGATCTCTTGGCTCTCGCATCGA  
TGAAGAACGCAGCGAAATGCGATAAGTAATGTGAATTGCAGAATTCAGTGAATCATCGAA  
TCTTTGAACGCATCTTGCGCTCCTTGGTATTCCGAGGAGCATGCCTGTTTGAGTGTCAATT  
AAATTCTCAACTCTCTTATAC-TTTTTGTAAAAGAGAGCTTGGACTGTGGAGGCTTGCT  
GGCCACTTTTTGGGGTCAGCTCCTCTGAAATGCATTAGCGGAACCGTTTGCGATCTGCCA  
CAAGTGTGATAAGTTATCTACACTGGCGAGGGGATTGCTCTCTGTAATGTTTCACTTCTA  
ATTGTCTCTACTTTGTGAGACAACTTTTGAATGCTTGACCTCAAATCAGGTAGGACTACC  
CGCTGAACTTAA

>ABC6-22

TTTCCGTAGGTGAACCTGCGGAAGGATCATTATTGAATTATGTTTCTAGATAGGTTGTAG  
CTGGCTC-TTTAGAGCATGTGCACGCCTGTTTGGACTTCATTTTCATCCACCTGTGCACC  
TATTGTAGTCTTTGGTTGGGTTAGGAGGAAGTGATCATTGTATCAGCATCTGCTGGGAGT  
GAGGACTTGCAATTGTGAAAGCTTTGCTGTCTTGATGTGATCATGGAATCTTTTCTCAC  
TAGAGTCTATGTCACTCATTATACTCTGTGCAATGTCATTGAATGTCTTTACATGGGCTT  
ATATGCCTATGAAAATTGTAATACAACCTTTCAGCAACGGATCTCTTGGCTCTCGCATCGA  
TGAAGAACGCAGCGAAATGCGATAAGTAATGTGAATTGCAGAATTCAGTGAATCATCGAA  
TCTTTGAACGCATCTTGCGCTCCTTGGTATTCCGAGGAGCATGCCTGTTTGAGTGTCAATT  
AAATTCTCAACTCTCTTATAC-TTTTTGTAAAAGAGAGCTTGGACTGTGGAGGCTTGCT  
GGCCACTTTTTGGGGTCAGCTCCTCTGAAATGCATTAGCGGAACCGTTTGCGATCTGCCA  
CAAGTGTGATAAGTTATCTACACTGGCGAGGGGATTGCTCTCTGTAATGTTTCACTTCTA  
ATTGTCTCTACTTTGTGAGACAACTTTTGAATGCTTGACCTCAAATCAGGTAGGACTACC  
CGCTGAACTTAA

>ABC7-26

TTTCCGTAGGTGAACCTGCGGAAGGATCATTATTGAATTATGTTTCTAGATAGGTTGTAG  
CTGGCTC-TTTAGAGCATGTGCACGCCTGTTTGGACTTCATTTTCATCCACCTGTGCACC  
TATTGTAGTCTTTGGTTGGGTTAGGAGGAAGTGATCATTGTATCAGCATCTGCTGGGAGT  
GAGGACTTGCAATTGTGAAAGCTTTGCTGTCTTGATGTGATCATGGAATCTTTTCTCAC  
TAGAGTCTATGTCACTCATTATACTCTGTGCAATGTCATTGAATGTCTTTACATGGGCTT  
GTATGCCTATGAAAATTGTAATACAACCTTTCAGCAACGGATCTCTTGGCTCTCGCATCGA  
TGAAGGACGCAGCGAAATGCGATAAGTAATGTGAATTGCAGAATTCAGTGAATCATCGAA  
TCTTTGAACGCATCTTGCGCTCCTTGGTATTCCGAGGAGCATGCCTGTTTGAGTGTCAATT  
AAATTCTCAACTCTCTTATAC-TTTTTGTAAAAGAGAGCTTGGACTGTGGAGGCTTGCT  
GGCCACTTTTTGGGGTCAGCTCCTCTGAAATGCATTAGCGGAACCGTTTGCAATCTGCCA  
CAAGTGTGATAAGTTATCTACACTGGCGAGGGGATTGCTCTCTGTAATGTTTCACTTCTA  
ATTGTCTCTACTTTGTGAGACAACTTTTGAATGCTTGACCTCAAATCAGGTAGGACTACC  
CGCTGAACTTAA

>ABC6-32

TTTCCGTAGGTGAACCTGCGGAAGGATCATTATTGAATTATGTTTCTAGATAGGTTGTAG



CTGGCTC-TTTAGAGCATGTGCACGCCTGTTTGGACTTCATTTTCATCCACCTGTGCACC  
TATTGTAGTCTTTGGTTGGGTTAGGAGGAAGTGATCATTGTATCAGCATCTGCTGGGAGT  
GAGGACTTGCATTGTGAAAGCTTTGCTGTCCTTGATGTGATCATGGAATCTTTTCTCAC  
TAGAGTCTATGTCACCTATTATACTCTGTGCAATGTCATTGAATGTCTTTACATGGGCTT  
GTATGCCTATGAAAATTGTAATACAACCTTTCAGCAACGGATCTCTTGGCTCTCGCATCGA  
TGAAGGACGCAGCGAAATGCGATAAGTAATGTGAATTGCAGAATTCAGTGAATCATCGAA  
TCTTTGAACGCATCTTGCCTCCTTGGTATTCCGAGGAGCATGCCTGTTTGAGTGTCAAT  
AAATTCTCAACTCTCTTATAC-TTTTTTGTAAGAGAGCTTGGACTGTGGAGGCTTGCT  
GGCCACTTTTTGGGGTCAGCTCCTCTGAAATGCATTAGCGGAACCGTTTGCAATCTGCCA  
CAAGTGTGATAAGTTATCTACACTGGCGAGGGGATTGCTCTCTGTAATGTTGAGCTTCTA  
ATTGTCTCTACTTTGTGAGACAACCTTTGAATGCTTGACCTCAAATCAGGTAGGACTACC  
CGCTGAACTTAA

>ABC9-22

TTTCCGTAGGTGAACCTGCGGAAGGATCATTATTGAATTATGTTTCTAGATAGGTTGTAG  
CTGGCTC-TTTAGAGCATGTGCACGCCTGTTTGGACTTCATTTTCATCCACCTGTGCACC  
TATTGTAGTCTTTGGTTGGGTTAGGAGGAAGTGATCATTGTATCAGCATCTGCTGGGAGT  
GAGGACTTGCATTGTGAAAGCTTTGCTGTCCTTGATGTGATCATGGAATCTTTTCTCAC  
TAGAGTCTATGTCACCTATTATACTCTGTGCAATGTCATTGAATGTCTTTACATGGGCTT  
GTATGCCTATGAAAATTGTAATACAACCTTTCAGCAACGGATCTCTTGGCTCTCGCATCGA  
TGAAGGACGCAGCGAAATGCGATAAGTAATGTGAATTGCAGAATTCAGTGAATCATCGAA  
TCTTTGAACGCATCTTGCCTCCTTGGTATTCCGAGGAGCATGCCTGTTTGAGTGTCAAT  
AAATTCTCAACTCTCTTATAC-TTTTTTGTAAGAGAGCTTGGACTGTGGAGGCTTGCT  
GGCCACTTTTTGGGGTCAGCTCCTCTGAAATGCATTAGCGGAACCGTTTGCGATCTGCCA  
CAAGTGTGATAAGTTATCTACACTGGCGAGGGGATTGCTCTCTGTAATGTTGAGCTTCTA  
ATTGTCTCTACTTTGTGAGACAACCTTTGAATGCTTGACCTCAAATCAGGTAGGACTACC  
CGCTGAACTTAA

>ABC6-34

TTTCCGTAGGTGAACCTGCGGAAGGATCATTATTGAATTATGTTTCTAGATAGGTTGTAG  
CTGGCTC-TTTAGAGCATGTGCACGCCTGTTTGGACTTCATTTTCATCCACCTGTGCACC  
TATTGTAGTCTTTGGTTGGGTTAGGAGGAAGTGGTCATTGTGTCAGCATCTGCTGGGAGT  
GAGGACTTGCATTGTGAAAGCTTTGCTGTCCTTGATGTGATCATGGAATCTTTTCTCAC  
TAGAGTCTATGTCACCTATTATACTCTGTGCAATGTCATTGAATGTCTTTACATGGGCTT  
GTATGCCTATGAAAATTGTAATACAACCTTTCAGCAACGGATCTCTTGGCTCTCGCATCGA  
TGAAGAACGCAGCGAAATGCGATAAGTAATGTGAATTGCAGAATTCAGTGAATCATCGAA  
TCTTTGAACGCATCTTGCCTCCTTGGTATTCCGAGGAGCATGCCTGTTTGAGTGTCAAT  
AAATTCTCAACTCTCTTATAC-TTTTTTGTAAGAGAGCTTGGACTGTGGAGGCTTGCT  
GGCCACTTTTTGGGGTCAGCTCCTCTGAAATGCATTAGCGGAACCGTTTGCGATCTGCCA  
CAAGTGTGATAAGTTATCTACACTGGCGAGGGGATTGCTCTCTGTAATGTTGAGCTTCTA  
ATTGTCTCTACTTTGTGAGACTACTTTTGAATGCTTGACCTCAAATCAGGTAGGACTACC  
CGCTGAACTTAA

>ABC7-38

TTTCCGTAGGTGAACCTGCGGAAGGATCATTATTGAATTATGTTTCTAGATAGGTTGTAG  
CTGGCTC-TTTAGAGCATGTGCACGCCTGTTTGGACTTCATTTTCATCCACCTGTGCACC  
TATTGTAGTCTTTGGTTGGGTTAGGGGGAAGTGGTCATTGTGTCAGCATCTGCTGGGAGT  
GAGGACTTGCATTGTGAAAGCTTTGCTGTCCTTGATGTGATCATGGAATCTTTTCTCAC  
TAGAGTCTATGTCACCTATTATACTCTGTGCAATGTCATTGAATGTCTTTACATGGGCTT  
GTATGCCTATGAAAATTGTAATACAACCTTTCAGCAACGGATCTCTTGGCTCTCGCATCGA  
TGAAGGACGCAGCGAAATGCGATAAGTAATGTGAATTGCAGAATTCAGTGAATCATCGAA  
TCTTTGAACGCATCTTGCCTCCTTGGTATTCCGAGGAGCATGCCTGTTTGAGTGTCAAT  
AAATTCTCAACTCTCTTATAC-TTTTTTGTAAGAGAGCTTGGACTGTGGAGGCTTGCT



GGCCACTTTTTGGGGTCAGCTCCTCTGAAATGCATTAGCGGAACCGTTTGCAATCTGCCA  
CAAGTGTGATAAGTTATCTACACTGGCGAGGGGATTGCTCTCTGTAATGTTGAGCTTCTA  
ATTGTCTCTACTTTGTGAGACAACTTTGAATGCTTGACCTCAAATCAGGTAGGACTACC  
CGCTGAACTTAA

>ABC10-20

TTTCCGTAGGTGAACCTGCGGAAGGATCATTATTGAATTATGTTTCTAGATAGGTTGTAG  
CTGGCTC-TTTAGAGCATGTGCACGCCTGTTTGGACTTCATTTTCATCCACCTGTGCACC  
TATTGTAGTCTTTGGTTGGGTTAGGGGGAAGTGGTCATTGTGTCAGCATCTGCTGGGAGT  
GAGGACTTGCATTGTGAAAGCTTTGCTGTCCTTGATGTGATCATGGAATCTTTTTCTCAC  
TAGAGTCTATGTCACTCATTATACTCTGTGCAATGTCATTGAATGTCTTTACATGGGCTT  
GTATGCCTATGAAAATTGTAATAACAACCTTTCAGCAACGGATCTCTTGGCTCTCGCATCGA  
TGAAGGACGCAGCGAAATGCGATAAGTAATGTGAATTGCAGAATTCAGTGAATCATCGAA  
TCTTTGAACGCATCTTGCGCTCCTTGGTATTCCGAGGAGCATGCCTGTTTGAGTGTGATT  
AAATTCTCAACTCTCTTATAC-TTTTTGTAAAAGAGAGCTTGGACTGTGGAGGCTTGCT  
GGCCACTTTTTGGGGTCAGCTCCTCTGAAATGCATTAGCGGAACCGTTTGCAATCTGCCA  
CAAGTGTGATAAGTTATCTACACTGGCGAGGGGATTGCTCTCTGTAATGTTGAGCTTCTA  
ATTGTCTCTACTTTGTGAGACTACTTTTGAATGCTTGACCTCAAATCAGGTAGGACTACC  
CGCTGAACTTAA

>ABC1-2

TTTCCGTAGGTGAACCTGCGGAAGGATCATTATTGAATTATGTTTCTAGATAGGTTGTAG  
CTGGCTCTTTTAGAGCATGTGCACGCCTGTTTGGACTTCATTTTCATCCACCTGTGCACC  
TATTGTAGTCTTTGGTTGGGTTAGGAGGAAGTGATCATTGTATCAGCATCTGCTGGGAGT  
GAGGACTTGCATTGTGAAAGCTTTGCTGTCCTTGATGTGATCATGGAATCTTTTTCTCAC  
TAGAGTCTATGTCACTCATTATACTCTGTGCAATGTCATTGAATGTCTTTACATGGGCTT  
GTATGCCTATGAAAATTGTAATAACAACCTTTCAGCAACGGATCTCTTGGCTCTCGCATCGA  
TGAAGAACGCAGCGAAATGCGATAAGTAATGTGAATTGCAGAATTCAGTGAATCATCGAA  
TCTTTGAACGCATCTTGCGCTCCTTGGTATTCCGAGGAGCATGCCTGTTTGAGTGTGATT  
AAATTCTCAACTCTCTTCTAC--TTTTTGTAAAAGAGAGCTTGGACTGTGGAGGCTTGCT  
GGCCACTTTTTGGGGTCAGCTCCTCTGAAATGCATTAGCGGAACCGTTTGCGATCTGCCA  
CAAGTGTGATAAGTTATCTACACTGGCGAGGGGATTGCTCTCTGTAATGTTGAGCTTCTA  
ATTGTCTCTACTTTGTGAGACTACTTTTGAATGCTTGACCTCAAATCAGGTAGGACTACC  
CGCTGAACTTAA

>ABC2-78

TTTCCGTAGGTGAACCTGCGGAAGGATCATTATTGAATTATGTTTCTAGATAGGTTGTAG  
CTGGCTCTTTTAGAGCATGTGCACGCCTGTTTGGACTTCATTTTCATCCACCTGTGCACC  
TATTGTAGTCTTTGGTTGGGTTAGGAGGAAGTGATCATTGTATCAGCATCTGCTGGGAGT  
GAGGACTTGCATTGTGAAAGCTTTGCTGTCCTTGATGTGATCATGGAATCTTTTTCTCAC  
TAGAGTCTATGTCACTCATTATACTCTGTGCAATGTCATTGAATGTCTTTACATGGGCTT  
GTATGCCTATGAAAATTGTAATAACAACCTTTCAGCAACGGATCTCTTGGCTCTCGCATCGA  
TGAAGAACGCAGCGAAATGCGATAAGTAATGTGAATTGCAGAATTCAGTGAATCATCGAA  
TCTTTGAACGCATCTTGCGCTCCTTGGTATTCCGAGGAGCATGCCTGTTTGAGTGTGATT  
AAATTCTCAACTCTCTTCTAC--TTTTTGTAAAAGAGAGCTTGGACTGTGGAGGCTTGCT  
GGCCACTTTTTGGGGTCAGCTCCTCTGAAATGCATTAGCGGAACCGTTTGCGATCTGCCA  
CAAGTGTGATAAGTTATCTACACTGGCGAGGGGATTGCTCTCTGTAATGTTGAGCTTCTA  
ATTGTCTCTACTTTGTGAGACTACTTTTGAATGCTTGACCTCAAATCAGGTAGGACTACC  
CGCTGAACTTAA

>ABC3-32

TTTCCGTAGGTGAACCTGCGGAAGGATCATTATTGAATTATGTTTCTAGATAGGTTGTAG  
CTGGCTCTTTTAGAGCATGTGCACGCCTGTTTGGACTTCATTTTCATCCACCTGTGCACC  
TATTGTAGTCTTTGGTTGGGTTAGGAGGAAGTGATCATTGTATCAGCATCTGCTGGGAGT



GAGGACTTGCATTGTGAAAGCTTTGCTGTCCTTGATGTGATCATGGAATCTTTTTCTCAC  
TAGAGTCTATGTCACCTATTATACTCTGTGCAATGTCATTGAATGTCTTTACATGGGCTT  
GTATGCCTATGAAAATTGTAATACAACCTTTCAGCAACGGATCTCTTGGCTCTCGCATCGA  
TGAAGAACGCAGCGAAATGCGATAAGTAATGTGAATTGCAGAATTCAGTGAATCATCGAA  
TCTTTGAACGCATCTTGCGCTCCTTGGTATTCCGAGGAGCATGCCTGTTTGAGTGTCAAT  
AAATTCTCAACTCTCTTCTAC--TTTTTGAAAAGAGAGCTTGGACTGTGGAGGCTTGCT  
GGCCACTTTTTGGGGTCAGCTCCTCTGAAATGCATTAGCGGAACCGTTTGCGATCTGCCA  
CAAGTGTGATAAGTTATCTACACTGGCGAGGGGATTGCTCTCTGTAATGTTTCACTTCTA  
ATTGTCTCTACTTTGTGAGACTACTTTTGAATGCTTGACCTCAAATCAGGTAGGACTACC  
CGCTGAACTTAA

>ABC4-65

TTTCCGTAGGTGAACCTGCGGAAGGATCATTATTGAATTATGTTTCTAGATAGGTTGTAG  
CTGGCTCTTTTAGAGCATGTGCACGCCTGTTTGGACTTCATTTTCATCCACCTGTGCACC  
TATTGTAGTCTTTGGTTGGGTTAGGAGGAAGTGATCATTGTATCAGCATCTGCTGGGAGT  
GAGGACTTGCATTGTGAAAGCTTTGCTGTCCTTGATGTGATCATGGAATCTTTTTCTCAC  
TAGAGTCTATGTCACCTATTATACTCTGTGCAATGTCATTGAATGTCTTTACATGGGCTT  
GTATGCCTATGAAAATTGTAATACAACCTTTCAGCAACGGATCTCTTGGCTCTCGCATCGA  
TGAAGAACGCAGCGAAATGCGATAAGTAATGTGAATTGCAGAATTCAGTGAATCATCGAA  
TCTTTGAACGCATCTTGCGCTCCTTGGTATTCCGAGGAGCATGCCTGTTTGAGTGTCAAT  
AAATTCTCAACTCTCTTCTAC--TTTTTGAAAAGAGAGCTTGGACTGTGGAGGCTTGCT  
GGCCACTTTTTGGGGTCAGCTCCTCTGAAATGCATTAGCGGAACCGTTTGCGATCTGCCA  
CAAGTGTGATAAGTTATCTACACTGGCGAGGGGATTGCTCTCTGTAATGTTTCACTTCTA  
ATTGTCTCTACTTTGTGAGACTACTTTTGAATGCTTGACCTCAAATCAGGTAGGACTACC  
CGCTGAACTTAA

>ABC5-30

TTTCCGTAGGTGAACCTGCGGAAGGATCATTATTGAATTATGTTTCTAGATAGGTTGTAG  
CTGGCTCTTTTAGAGCATGTGCACGCCTGTTTGGACTTCATTTTCATCCACCTGTGCACC  
TATTGTAGTCTTTGGTTGGGTTAGGAGGAAGTGATCATTGTATCAGCATCTGCTGGGAGT  
GAGGACTTGCATTGTGAAAGCTTTGCTGTCCTTGATGTGATCATGGAATCTTTTTCTCAC  
TAGAGTCTATGTCACCTATTATACTCTGTGCAATGTCATTGAATGTCTTTACATGGGCTT  
GTATGCCTATGAAAATTGTAATACAACCTTTCAGCAACGGATCTCTTGGCTCTCGCATCGA  
TGAAGAACGCAGCGAAATGCGATAAGTAATGTGAATTGCAGAATTCAGTGAATCATCGAA  
TCTTTGAACGCATCTTGCGCTCCTTGGTATTCCGAGGAGCATGCCTGTTTGAGTGTCAAT  
AAATTCTCAACTCTCTTCTAC--TTTTTGAAAAGAGAGCTTGGACTGTGGAGGCTTGCT  
GGCCACTTTTTGGGGTCAGCTCCTCTGAAATGCATTAGCGGAACCGTTTGCGATCTGCCA  
CAAGTGTGATAAGTTATCTACACTGGCGAGGGGATTGCTCTCTGTAATGTTTCACTTCTA  
ATTGTCTCTACTTTGTGAGACTACTTTTGAATGCTTGACCTCAAATCAGGTAGGACTACC  
CGCTGAACTTAA

>ABC6-41

TTTCCGTAGGTGAACCTGCGGAAGGATCATTATTGAATTATGTTTCTAGATAGGTTGTAG  
CTGGCTCTTTTAGAGCATGTGCACGCCTGTTTGGACTTCATTTTCATCCACCTGTGCACC  
TATTGTAGTCTTTGGTTGGGTTAGGAGGAAGTGATCATTGTATCAGCATCTGCTGGGAGT  
GAGGACTTGCATTGTGAAAGCTTTGCTGTCCTTGATGTGATCATGGAATCTTTTTCTCAC  
TAGAGTCTATGTCACCTATTATACTCTGTGCAATGTCATTGAATGTCTTTACATGGGCTT  
GTATGCCTATGAAAATTGTAATACAACCTTTCAGCAACGGATCTCTTGGCTCTCGCATCGA  
TGAAGAACGCAGCGAAATGCGATAAGTAATGTGAATTGCAGAATTCAGTGAATCATCGAA  
TCTTTGAACGCATCTTGCGCTCCTTGGTATTCCGAGGAGCATGCCTGTTTGAGTGTCAAT  
AAATTCTCAACTCTCTTCTAC--TTTTTGAAAAGAGAGCTTGGACTGTGGAGGCTTGCT  
GGCCACTTTTTGGGGTCAGCTCCTCTGAAATGCATTAGCGGAACCGTTTGCGATCTGCCA  
CAAGTGTGATAAGTTATCTACACTGGCGAGGGGATTGCTCTCTGTAATGTTTCACTTCTA



ATTGTCTCTACTTTGTGAGACTACTTTTGAATGCTTGACCTCAAATCAGGTAGGACTACC  
CGCTGAACTTAA

>ABC7-33

TTTCCGTAGGTGAACCTGCGGAAGGATCATTATTGAATTATGTTTCTAGATAGGTTGTAG  
CTGGCTCTTTTAGAGCATGTGCACGCCTGTTTGGACTTCATTTTCATCCACCTGTGCACC  
TATTGTAGTCTTTGGTTGGGTTAGGAGGAAGTGATCATTGTATCAGCATCTGCTGGGAGT  
GAGGACTTGCATTGTGAAAGCTTTGCTGTCCTTGATGTGATCATGGAATCTTTTTCTCAC  
TAGAGTCTATGTCACTCATTATACTCTGTGCAATGTCATTGAATGTCTTTACATGGGCTT  
GTATGCCTATGAAAATTGTAATAACAACCTTTCAGCAACGGATCTCTTGGCTCTCGCATCGA  
TGAAGAACGCAGCGAAATGCGATAAGTAATGTGAATTGCAGAATTCAGTGAATCATCGAA  
TCTTTGAACGCATCTTGCCTCCTTGGTATTCCGAGGAGCATGCCTGTTTGAGTGTCAAT  
AAATTCTCAACTCTCTTCTAC--TTTTGTAAAAGAGAGCTTGGACTGTGGAGGCTTGCT  
GGCCACTTTTTGGGGTCAGCTCCTCTGAAATGCATTAGCGGAACCGTTTGCGATCTGCCA  
CAAGTGTGATAAGTTATCTACACTGGCGAGGGGATTGCTCTCTGTAATGTTTCAGCTTCTA  
ATTGTCTCTACTTTGTGAGACTACTTTTGAATGCTTGACCTCAAATCAGGTAGGACTACC  
CGCTGAACTTAA

>ABC8-22

TTTCCGTAGGTGAACCTGCGGAAGGATCATTATTGAATTATGTTTCTAGATAGGTTGTAG  
CTGGCTCTTTTAGAGCATGTGCACGCCTGTTTGGACTTCATTTTCATCCACCTGTGCACC  
TATTGTAGTCTTTGGTTGGGTTAGGAGGAAGTGATCATTGTATCAGCATCTGCTGGGAGT  
GAGGACTTGCATTGTGAAAGCTTTGCTGTCCTTGATGTGATCATGGAATCTTTTTCTCAC  
TAGAGTCTATGTCACTCATTATACTCTGTGCAATGTCATTGAATGTCTTTACATGGGCTT  
GTATGCCTATGAAAATTGTAATAACAACCTTTCAGCAACGGATCTCTTGGCTCTCGCATCGA  
TGAAGAACGCAGCGAAATGCGATAAGTAATGTGAATTGCAGAATTCAGTGAATCATCGAA  
TCTTTGAACGCATCTTGCCTCCTTGGTATTCCGAGGAGCATGCCTGTTTGAGTGTCAAT  
AAATTCTCAACTCTCTTCTAC--TTTTGTAAAAGAGAGCTTGGACTGTGGAGGCTTGCT  
GGCCACTTTTTGGGGTCAGCTCCTCTGAAATGCATTAGCGGAACCGTTTGCGATCTGCCA  
CAAGTGTGATAAGTTATCTACACTGGCGAGGGGATTGCTCTCTGTAATGTTTCAGCTTCTA  
ATTGTCTCTACTTTGTGAGACTACTTTTGAATGCTTGACCTCAAATCAGGTAGGACTACC  
CGCTGAACTTAA

>ABC9-32

TTTCCGTAGGTGAACCTGCGGAAGGATCATTATTGAATTATGTTTCTAGATAGGTTGTAG  
CTGGCTCTTTTAGAGCATGTGCACGCCTGTTTGGACTTCATTTTCATCCACCTGTGCACC  
TATTGTAGTCTTTGGTTGGGTTAGGAGGAAGTGATCATTGTATCAGCATCTGCTGGGAGT  
GAGGACTTGCATTGTGAAAGCTTTGCTGTCCTTGATGTGATCATGGAATCTTTTTCTCAC  
TAGAGTCTATGTCACTCATTATACTCTGTGCAATGTCATTGAATGTCTTTACATGGGCTT  
GTATGCCTATGAAAATTGTAATAACAACCTTTCAGCAACGGATCTCTTGGCTCTCGCATCGA  
TGAAGAACGCAGCGAAATGCGATAAGTAATGTGAATTGCAGAATTCAGTGAATCATCGAA  
TCTTTGAACGCATCTTGCCTCCTTGGTATTCCGAGGAGCATGCCTGTTTGAGTGTCAAT  
AAATTCTCAACTCTCTTCTAC--TTTTGTAAAAGAGAGCTTGGACTGTGGAGGCTTGCT  
GGCCACTTTTTGGGGTCAGCTCCTCTGAAATGCATTAGCGGAACCGTTTGCGATCTGCCA  
CAAGTGTGATAAGTTATCTACACTGGCGAGGGGATTGCTCTCTGTAATGTTTCAGCTTCTA  
ATTGTCTCTACTTTGTGAGACTACTTTTGAATGCTTGACCTCAAATCAGGTAGGACTACC  
CGCTGAACTTAA

>ABC12-45

TTTCCGTAGGTGAACCTGCGGAAGGATCATTATTGAATTATGTTTCTAGATAGGTTGTAG  
CTGGCTCTTTTAGAGCATGTGCACGCCTGTTTGGACTTCATTTTCATCCACCTGTGCACC  
TATTGTAGTCTTTGGTTGGGTTAGGAGGAAGTGATCATTGTATCAGCATCTGCTGGGAGT  
GAGGACTTGCATTGTGAAAGCTTTGCTGTCCTTGATGTGATCATGGAATCTTTTTCTCAC  
TAGAGTCTATGTCACTCATTATACTCTGTGCAATGTCATTGAATGTCTTTACATGGGCTT



GTATGCCTATGAAAATTGTAATACAACCTTTTCAGCAACGGATCTCTTGGCTCTCGCATCGA  
TGAAGAACGCAGCGAAATGCGATAAGTAATGTGAATTGCAGAATTCAGTGAATCATCGAA  
TCTTTGAACGCATCTTGCCTCCTTGGTATTCCGAGGAGCATGCCTGTTTGAGTGTCAAT  
AAATTCTCAACTCTCTTCTAC--TTTTTGAAAAGAGAGCTTGGACTGTGGAGGCTTGCT  
GGCCACTTTTTGGGGTCAGCTCCTCTGAAATGCATTAGCGGAACCGTTTGCGATCTGCCA  
CAAGTGTGATAAGTTATCTACACTGGCGAGGGGATTGCTCTCTGTAATGTTTCAGCTTCTA  
ATTGTCTCTACTTTGTGAGACTACTTTTGAATGCTTGACCTCAAATCAGGTAGGACTACC  
CGCTGAACTTAA

>ABC6-1

TTTCCGTAGGTGAACCTGCGGAAGGATCATTATTGAATTATGTTTCTAGATAGGTTGTAG  
CTGGCTCTTTTAGAGCATGTGCACGCCTGTTTGGACTTCATTTTCATCCACCTGTGCACC  
TATTGTAGTCTTTGGTTGGGTTAGGAGGAAGTGATCATTGTATCAGCATCTGCTGGGAGT  
GAGGACTTGCATTGTGAAAGCTTTGCTGTCCTTGATGTGATCATGGAATCTTTTTCTCAC  
TAGAGTCTATGTCACCTCATTATACTCTGTCTGAATGTCATTGAATGTCTTTACATGGGCTT  
GTATGCCTATGAAAATTGTAATACAACCTTTTCAGCAACGGATCTCTTGGCTCTCGCATCGA  
TGAAGAACGCAGCGAAATGCGATAAGTAATGTGAATTGCAGAATTCAGTGAATCATCGAA  
TCTTTGAACGCATCTTGCCTCCTTGGTATTCCGAGGAGCATGCCTGTTTGAGTGTCAAT  
AAATTCTCAACTCTCTTCTAC--TTTTTGAAAAGAGAGCTTGGACTGTGGAGGCTTGCT  
GGCCACTTTTTGGGGTCAGCTCCTCTGAAATGCATTAGCGGAACCGTTTGCGATCTGCCA  
CAAGTGTGATAAGTTATCTACACTGGCGAGGGGATTGCTCTCTGTAATGTTTCAGCTTCTA  
ATTGTCTCTACTTTGTGAGACTACTTTTGAATGCTTGACCTCAAATCAGGTAGGACTACC  
CGCTGAACTTAA

>ABC7-2

TTTCCGTAGGTGAACCTGCGGAAGGATCATTATTGAATTATGTTTCTAGATAGGTTGTAG  
CTGGCTCTTTTAGAGCATGTGCACGCCTGTTTGGACTTCATTTTCATCCACCTGTGCACC  
TATTGTAGTCTTTGGTTGGGTTAGGAGGAAGTGATCATTGTATCAGCATCTGCTGGGAGT  
GAGGACTTGCATTGTGAAAGCTTTGCTGTCCTTGATGTGATCATGGAATCTTTTTCTCAC  
TAGAGTCTATGTCACCTCATTATACTCTGTCTGAATGTCATTGAATGTCTTTACATGGGCTT  
ATATGCCTATGAAAATTGTAATACAACCTTTTCAGCAACGGATCTCTTGGCTCTCGCATCGA  
TGAAGAACGCAGCGAAATGCGATAAGTAATGTGAATTGCAGAATTCAGTGAATCATCGAA  
TCTTTGAACGCATCTTGCCTCCTTGGTATTCCGAGGAGCATGCCTGTTTGAGTGTCAAT  
AAATTCTCAACTCTCTTCTAC--TTTTTGAAAAGAGAGCTTGGACTGTGGAGGCTTGCT  
GGCCACTTTTTGGGGTCAGCTCCTCTGAAATGCATTAGCGGAACCGTTTGCGATCTGCCA  
CAAGTGTGATAAGTTATCTACACTGGCGAGGGGATTGCTCTCTGTAATGTTTCAGCTTCTA  
ATTGTCTCTACTTTGTGAGACTACTTTTGAATGCTTGACCTCAAATCAGGTAGGACTACC  
CGCTGAACTTAA

>ABC8-57

TTTCCGTAGGTGAACCTGCGGAAGGATCATTATTGAATTATGTTTCTAGATAGGTTGTAG  
CTGGCTCTTTTAGAGCATGTGCACGCCTGTTTGGACTTCATTTTCATCCACCTGTGCACC  
TATTGTAGTCTTTGGTTGGGTTAGGAGGAAGTGATCATTGTATCAGCATCTGCTGGGAGT  
GAGGACTTGCATTGTGAAAGCTTTGCTGTCCTTGATGTGATCATGGAATCTTTTTCTCAC  
TAGAGTCTATGTCACCTCATTATACTCTGTCTGAATGTCATTGAATGTCTTTACATGGGCTT  
ATATGCCTATGAAAATTGTAATACAACCTTTTCAGCAACGGATCTCTTGGCTCTCGCATCGA  
TGAAGAACGCAGCGAAATGCGATAAGTAATGTGAATTGCAGAATTCAGTGAATCATCGAA  
TCTTTGAACGCATCTTGCCTCCTTGGTATTCCGAGGAGCATGCCTGTTTGAGTGTCAAT  
AAATTCTCAACTCTCTTCTAC--TTTTTGAAAAGAGAGCTTGGACTGTGGAGGCTTGCT  
GGCCACTTTTTGGGGTCAGCTCCTCTGAAATGCATTAGCGGAACCGTTTGCGATCTGCCA  
CAAGTGTGATAAGTTATCTACACTGGCGAGGGGATTGCTCTCTGTAATGTTTCAGCTTCTA  
ATTGTCTCTACTTTGTGAGACTACTTTTGAATGCTTGACCTCAAATCAGGTAGGACTACC  
CGCTGAACTTAA



>ABC6-45

TTTCCGTAGGTGAACCTGCGGAAGGATCATTATTGAATTATGTTTCTAGATAGGTTGTAG  
CTGGCTCTTTTAGAGCATGTGCACGCCTGTTTGGACTTCATTTTCATCCACCTGTGCACC  
TATTGTAGTCTTTGGTTGGGTTAGGAGGAAGTGATCATTGTATCAGCATCTGCTGGGAGT  
GAGGACTTGCATTGTGAAAGCTTTGCTGTCCTTGATGTGATCATGGAATCTCTTTCTCAC  
TAGAGTCTATGTCACCTCATTATACTCTGTGCAATGTCATTGAATGTCTTTACATGGGCTT  
ATATGCCTATGAAAATTGTAATACAACCTTTCAGCAACGGATCTCTTGGCTCTCGCATCGA  
TGAAGAACGCAGCGAAATGCGATAAGTAATGTGAATTGCAGAATTCAGTGAATCATCGAA  
TCTTTGAACGCATCTTGCCTCCTTGGTATTCCGAGGAGCATGCCTGTTTGAGTGTCTATT  
AAATTCTCAACTCTCTTCTAC--TTTTGTAAAAGAGAGCTTGGACTGTGGAGGCTTGCT  
GGCCACTTTTTGGGGTCAGCTCCTCTGAAATGCATTAGCGGAACCGTTTGCGATCTGCCA  
CAAGTGTGATAAGTTATCTACACTGGCGAGGGGATTGCTCTCTGTAATGTTTCAGCTTCTA  
ATTGTCTCTACTTTGTGAGACTACTTTTGAATGCTTGACCTCAAATCAGGTAGGACTACC  
CGCTGAACTTAA

>ABC10-49

TTTCCGTAGGTGAACCTGCGGAAGGATCATTATTGAATTATGTTTCTAGATAGGTTGTAG  
CTGGCTCTTTTAGAGCATGTGCACGCCTGTTTGGACTTCATTTTCATCCACCTGTGCACC  
TATTGTAGTCTTTGGTTGGGTTAGGAGGAAGTGATCATTGTATCAGCATCTGCTGGGAGT  
GAGGACTTGCATTGTGAAAGCTTTGCTGTCCTTGATGTGATCATGGAATCTCTTTCTCAC  
TAGAGTCTATGTCACCTCATTATACTCTGTGCAATGTCATTGAATGTCTTTACATGGGCTT  
GTATGCCTATGAAAATTGTAATACAACCTTTCAGCAACGGATCTCTTGGCTCTCGCATCGA  
TGAAGAACGCAGCGAAATGCGATAAGTAATGTGAATTGCAGAATTCAGTGAATCATCGAA  
TCTTTGAACGCATCTTGCCTCCTTGGTATTCCGAGGAGCATGCCTGTTTGAGTGTCTATT  
AAATTCTCAACTCTCTTCTAC--TTTTGTAAAAGAGAGCTTGGACTGTGGAGGCTTGCT  
GGCCACTTTTTGGGGTCAGCTCCTCTGAAATGCATTAGCGGAACCGTTTGCGATCTGCCA  
CAAGTGTGATAAGTTATCTACACTGGCGAGGGGATTGCTCTCTGTAATGTTTCAGCTTCTA  
ATTGTCTCTACTTTGTGAGACTACTTTTGAATGCTTGACCTCAAATCAGGTAGGACTACC  
CGCTGAACTTAA

>ABC5-20

TTTCCGTAGGTGAACCTGCGGAAGGATCATTATTGAATTATGTTTCTAGATAGGTTGTAG  
CTGGCTCTTTTAGAGCATGTGCACGCCTGTTTGGACTTCATTTTCATCCACCTGTGCACC  
TATTGTAGTCTTTGGTTGGGTTAGGAGGAAGTGATCATTGTATCAGCATCTGCTGGGAGT  
GAGGACTTGCATTGTGAAAGCTTTGCTGTCCTTGATGTGATCATGGAATCTCTTTCTCAC  
TAGAGTCTATGTCACCTCATTATACTCTGTGCAATGTCATTGAATGTCTTTACATGGGCTT  
GTATGCCTATGAAAATTGTAATACAACCTTTCAGCAACGGATCTCTTGGCTCTCGCATCGA  
TGAAGAACGCAGCGAAATGCGATAAGTAATGTGAATTGCAGAATTCAGTGAATCATCGAA  
TCTTTGAACGCATCTTGCCTCCTTGGTATTCCGAGGAGCATGCCTGTTTGAGTGTCTATT  
AAATTCTCAACTCTCTTCTAC--TTTTGTAAAAGAGAGCTTGGACTGTGGAGGCTTGCT  
GGCCACTTTTTGGGGTCAGCTCCTCTGAAATGCATTAGCGGAACCGTTTGCAATCTGCCA  
CAAGTGTGATAAGTTATCTACACTGGCGAGGGGATTGCTCTCTGTAATGTTTCAGCTTCTA  
ATTGTCTCTACTTTGTGAGACTACTTTTGAATGCTTGACCTCAAATCAGGTAGGACTACC  
CGCTGAACTTAA

>ABC10-7

TTTCCGTAGGTGAACCTGCGGAAGGATCATTATTGAATTATGTTTCTAGATAGGTTGTAG  
CTGGCTCTTTTAGAGCATGTGCACGCCTGTTTGGACTTCATTTTCATCCACCTGTGCACC  
TATTGTAGTCTTTGGTTGGGTTAGGAGGAAGTGATCATTGTATCAGCATCTGCTGGGAGT  
GAGGACTTGCATTGTGAAAGCTTTGCTGTCCTTGATGTGATCATGGAATCTTTTTCTCAC  
TAGAGTCTATGTCACCTCATTATACTCTGTGCAATGTCATTGAATGTCTTTACATGGGCTT  
GTATGCCTATGAAAATTGTAATACAACCTTTCAGCAACGGATCTCTTGGCTCTCGCATCGA  
TGAAGGACGCAGCGAAATGCGATAAGTAATGTGAATTGCAGAATTCAGTGAATCATCGAA



TCTTTGAACGCATCTTGCGCTCCTTGGTATTCCGAGGAGCATGCCTGTTTGAGTGTCAATT  
AAATTCTCAACTCTCTTCTAC--TTTTTGAAAAGAGAGCTTGGACTGTGGAGGCTTGCT  
GGCCACTTTTTGGGGTCAGCTCCTCTGAAATGCATTAGCGGAACCGTTTGCGATCTGCCA  
CAAGTGTGATAAGTTATCTACACTGGCGAGGGGATTGCTCTCTGTAATGTTTCACTTCTA  
ATTGTCTCTACTTTGTGAGACTACTTTTGAATGCTTGACCTCAAATCAGGTAGGACTACC  
CGCTGAACTTAA

>ABC12-54

TTTCCGTAGGTGAACCTGCGGAAGGATCATTATTGAATTATGTTTCTAGATAGGTTGTAG  
CTGGCTCTTTTAGAGCATGTGCACGCCTGTTTGGACTTCATTTTCATCCACCTGTGCACC  
TATTGTAGTCTTTGGTTGGGTTAGGAGGAAGTGATCATTGTATCAGCATCTGCTGGGAGT  
GAGGACTTGCAATTGTGAAAGCTTTGCTGTCTTGATGTGATCATGGAATCTCTTCTCAC  
TAGAGTCTATGTCACTCATTATACTCTGTGCAATGTCATTGAATGTCTTACATGGGCTT  
GTATGCCTATGAAAATTGTAATACAACCTTTCAGCAACGGATCTCTTGGCTCTCGCATCGA  
TGAAGGACGCAGCGAAATGCGATAAGTAATGTGAATTGCAGAATTCAGTGAATCATCGAA  
TCTTTGAACGCATCTTGCGCTCCTTGGTATTCCGAGGAGCATGCCTGTTTGAGTGTCAATT  
AAATTCTCAACTCTCTTCTAC--TTTTTGAAAAGAGAGCTTGGACTGTGGAGGCTTGCT  
GGCCACTTTTTGGGGTCAGCTCCTCTGAAATGCATTAGCGGAACCGTTTGCGATCTGCCA  
CAAGTGTGATAAGTTATCTACACTGGCGAGGGGATTGCTCTCTGTAATGTTTCACTTCTA  
ATTGTCTCTACTTTGTGAGACTACTTTTGAATGCTTGACCTCAAATCAGGTAGGACTACC  
CGCTGAACTTAA

>ABC6-36

TTTCCGTAGGTGAACCTGCGGAAGGATCATTATTGAATTATGTTTCTAGATAGGTTGTAG  
CTGGCTCTTTTAGAGCATGTGCACGCCTGTTTGGACTTCATTTTCATCCACCTGTGCACC  
TATTGTAGTCTTTGGTTGGGTTAGGAGGAAGTGATCATTGTATCAGCATCTGCTGGGAGT  
GAGGACTTGCAATTGTGAAAGCTTTGCTGTCTTGATGTGATCATGGAATCTTTTTCTCAC  
TAGAGTCTATGTCACTCATTATACTCTGTGCAATGTCATTGAATGTCTTACATGGGCTT  
GTATGCCTATGAAAATTGTAATACAACCTTTCAGCAACGGATCTCTTGGCTCTCGCATCGA  
TGAAGAACGCAGCGAAATGCGATAAGTAATGTGAATTGCAGAATTCAGTGAATCATCGAA  
TCTTTGAACGCATCTTGCGCTCCTTGGTATTCCGAGGAGCATGCCTGTTTGAGTGTCAATT  
AAATTCTCAACTCTCTTCTAC--TTTTTGAAAAGAGAGCTTGGACTGTGGAGGCTTGCT  
GGCCACTTTTTGGGGTCAGCTCCTCTGAAATGCATTAGCGGAACCGTTTGCGATCTGCCA  
CAAGTGTGATAAGTTATCTACACTGGCGAGGGGATTGTTCTCTGTAATGTTTCACTTCTA  
ATTGTCTCTACTTTGTGAGACTACTTTTGAATGCTTGACCTCAAATCAGGTAGGACTACC  
CGCTGAACTTAA

>ABC6-58

TTTCCGTAGGTGAACCTGCGGAAGGATCATTATTGAATTATGTTTCTAGATAGGTTGTAG  
CTGGCTCTTTTAGAGCATGTGCACGCCTGTTTGGACTTCATTTTCATCCACCTGTGCACC  
TATTGTAGTCTTTGGTTGGGTTAGGAGGAAGTGATCATTGTATCAGCATCTGCTGGGAGT  
GAGGACTTGCAATTGTGAAAGCTTTGCTGTCTTGATGTGATCATGGAATCTTTTTCTCAC  
TAGAGTCTATGTCACTCATTATACTCTGTGCAATGTCATTGAATGTCTTACATGGGCTT  
GTATGCCTATGAAAATTGTAATACAACCTTTCAGCAACGGATCTCTTGGCTCTCGCATCGA  
TGAAGAACGCAGCGAAATGCGATAAGTAATGTGAATTGCAGAATTCAGTGAATCATCGAA  
TCTTTGAACGCATCTTGCGCTCCTTGGTATTCCGAGGAGCATGCCTGTTTGAGTGTCAATT  
AAATTCTCAACTCTCTTCTAC--TTTTTGAAAAGAGAGCTTGGACTGTGGAGGCTTGCT  
GGCCACTTTTTGGGATCAGCTCCTCTGAAATGCATTAGCGGAACCGTTTGCGATCTGCCA  
CAAGTGTGATAAGTTATCTACACTGGCGAGGGGATTGCTCTCTGTAATGTTTCACTTCTA  
ATTGTCTCTACTTTGTGAGACTACTTTTGAATGCTTGACCTCAAATCAGGTAGGACTACC  
CGCTGAACTTAA

>ABC10-8

TTTCCGTAGGTGAACCTGCGGAAGGATCATTATTGAATTATGTTTCTAGATAGGTTGTAG



CTGGCTCTTTTAGAGCATGTGCACGCCTGTTTGGACTTCATTTTCATCCACCTGTGCACC  
TATTGTAGTCTTTGGTTGGGTTAGGAGGAAGTGATCATTGTATCAGCATCTGCTGGGAGT  
GAGGACTTGCATTGTGAAAGCTTTGCTGTCCTTGATGTGATCATGGAATCTCTTTCTCAC  
TAGAGTCTATGTCACCTATTATACTCTGTGCAATGTCATTGAATGTCTTTACATGGGCTT  
ATATGCCTATGAAAATTGTAATACAACCTTTCAGCAACGGATCTCTTGGCTCTCGCATCGA  
TGAAGAACGCAGCGAAATGCGATAAGTAATGTGAATTGCAGAATTCAGTGAATCATCGAA  
TCTTTGAACGCATCTTTCGCTCCTTGGTATTCCGAGGAGCATGCCTGTTTGAGTGTCATT  
AAATTCTCAACTCTCTTCTAC--TTTTTGTAAGAGAGCTTGGACTGTGGAGGCTTGCT  
GGCCACTTTTTGGGGTCAGCTCCTCTGAAATGCATTAGCGGAACCGTTTGCGATCTGCCA  
CAAGTGTGATAAGTTATCTACACTGGCGAGGGGATTGCTCTCTGTAATGTTTCAGCTTCTA  
ATTGTCTCTACTTTGTGAGACAACCTTTGAATGCTTGACCTCAAATCAGGTAGGACTACC  
CGCTGAACTTAA

>ABC9-2

TTTCCGTAGGTGAACCTGCGGAAGGATCATTATTGAATTATGTTTCTAGATAGGTTGTAG  
CTGGCTCTTTTAGAGCATGTGCACGCCTGTTTGGACTTCATTTTCATCCACCTGTGCACC  
TATTGTAGTCTTTGGTTGGGTTAGGAGGAAGTGATCATTGTATCAGCATCTGCTGGGAGT  
GAGGACTTGCATTGTGAAAGCTTTGCTGTCCTTGATGTGATCATGGAATCTTTTTCTCAC  
TAGAGTCTATGTCACCTATTATACTCTGTGCAATGTCATTGAATGTCTTTACATGGGCTT  
GTATGCCTATGAAAATTGTAATACAACCTTTCAGCAACGGATCTCTTGGCTCTCGCATCGA  
TGAAGAACGCAGCGAAATGCGATAAGTAATGTGAATTGCAGAATTCAGTGAATCATCGAA  
TCTTTGAACGCATCTTTCGCTCCTTGGTATTCCGAGGAGCATGCCTGTTTGAGTGTCATT  
AAATTCTCAACTCTCTTCTAC--TTTTTGTAAGAGAGCTTGGACTGTGGAGGCTTGCT  
GACCACTTTTTGGGGTCAGCTCCTCTGAAATGCATTAGCGGAACCGTTTGCGATCTGCCA  
CAAGTGTGATAAGTTATCTACACTGGCGAGGGGATTGCTCTCTGTAATGTTTCAGCTTCTA  
ATTGTCTCTACTTTGTGAGACTACTTTTGAATGCTTGACCTCAAATCAGGTAGGACTACC  
CGCTGAACTTAA

>ABC1-71

TTTCCGTAGGTGAACCTGCGGAAGGATCATTATTGAATTATGTTTCTAGATAGGTTGTAG  
CTGGCTCTTTTAGAGCATGTGCACGCCTGTTTGGACTTCATTTTCATCCACCTGTGCACC  
TATTGTAGTCTTTGGTTGGGTTAGGAGGAAGTGGTCATTGTGTCAGCATCTGCTGGATGT  
GAGGACTTGCATTGTGAAAGCTTTGCTGTCCTTGATGTGATCATGGAATCTCTTTCTCAC  
TAGAGTCTATGTCACCTATTATACTCTGTGCAATGTCATTGAATGTCTTTACATGGGCTT  
ATATGCCTATGAAAATTGTAATACAACCTTTCAGCAACGGATCTCTTGGCTCTCGCATCGA  
TGAAGAACGCAGCGAAATGCGATAAGTAATGTGAATTGCAGAATTCAGTGAATCATCGAA  
TCTTTGAACGCATCTTTCGCTCCTTGGTATTCCGAGGAGCATGCCTGTTTGAGTGTCATT  
AAATTCTCAACTCTCTTCTAC--TTTTTGTAAGAGAGCTTGGACTGTGGAGGCTTGCT  
GGCCACTTTTTGGGGTCAGCTCCTCTGAAATGCATTAGCGGAACCGTTTGCGATCTGCCA  
CAAGTGTGATAAGTTATCTACACTGGCGAGGGGATTGCTCTCTGTAATGTTTCAGCTTCTA  
ATTGTCTCTACTTTGTGAGACTACTTTTGAATGCTTGACCTCAAATCAGGTAGGACTACC  
CGCTGAACTTAA

>ABC10-27

TTTCCGTAGGTGAACCTGCGGAAGGATCATTATTGAATTATGTTTCTAGATAGGTTGTAG  
CTGGCTCTTTTAGAGCATGTGCACGCCTGTTTGGACTTCATTTTCATCCACCTGTGCACC  
TATTGTAGTCTTTGGTTGGGTTAGGAGGAAGTGGTCATTGTGTCAGCATCTGCTGGATGT  
GAGGACTTGCATTGTGAAAGCTTTGCTGTCCTTGATGTGATCATGGAATCTCTTTCTCAC  
TAGAGTCTATGTCACCTATTATACTCTGTGCAATGTCATTGAATGTCTTTACATGGGCTT  
ATATGCCTATGAAAATTGTAATACAACCTTTCAGCAACGGATCTCTTGGCTCTCGCATCGA  
TGAAGAACGCAGCGAAATGCGATAAGTAATGTGAATTGCAGAATTCAGTGAATCATCGAA  
TCTTTGAACGCATCTTTCGCTCCTTGGTATTCCGAGGAGCATGCCTGTTTGAGTGTCATT  
AAATTCTCAACTCTCTTCTAC--TTTTTGTAAGAGAGCTTGGACTGTGGAGGCTTGCT



GGCCACTTTTTGGGGTCAGCTCCTCTGAAATGCATTAGCGGAACCGTTTGCGATCTGCCA  
CAAGTGTGATAAGTTATCTACACTGGCGAGGGGATTGCTCTCTGTAATGTTGAGCTTCTA  
ATTGTCTCTACTTTGTGAGACTACTTTTGAATGCTTGACCTCAAATCAGGTAGGACTACC  
CGCTGAACTTAA

>ABC4-57

TTTCCGTAGGTGAACCTGCGGAAGGATCATTATTGAATTATGTTTCTAGATAGGTTGTAG  
CTGGCTCTTTTAGAGCATGTGCACGCCTGTTTGGACTTCATTTTCATCCACCTGTGCACC  
TATTGTAGTCTTTGGTTGGGTTAGGAGGAAGTGATCATTGTGTCAGCATCTGCTGGATGT  
GAGGACTTGCATTGTGAAAGCTTTGCTGTCCTTGATGTGATCATGGAATCTCTTTCTCAC  
TAGAGTCTATGTCACTCATTATACTCTGTGCAATGTCATTGAATGTCTTTACATGGGCTT  
ATATGCCTATGAAAATTGTAATAACAACCTTTCAGCAACGGATCTCTTGGCTCTCGCATCGA  
TGAAGAACGCAGCGAAATGCGATAAGTAATGTGAATTGCAGAATTCAGTGAATCATCGAA  
TCTTTGAACGCATCTTGCGCTCCTTGGTATTCCGAGGAGCATGCCTGTTTGAGTGTGATT  
AAATTCTCAACTCTCTTCTAC--TTTTTGTAAGAGAGCTTGGACTGTGGAGGCTTGCT  
GGCCACTTTTTGGGGTCAGCTCCTCTGAAATGCATTAGCGGAACCGTTTGCGATCTGCCA  
CAAGTGTGATAAGTTATCTACACTGGCGAGGGGATTGCTCTCTGTAATGTTGAGCTTCTA  
ATTGTCTCTACTTTGTGAGACTACTTTTGAATGCTTGACCTCAAATCAGGTAGGACTACC  
CGCTGAACTTAA

>ABC9-55

TTTCCGTAGGTGAACCTGCGGAAGGATCATTATTGAATTATGTTTCTAGATAGGTTGTAG  
CTGGCTCTTTTAGAGCATGTGCACGCCTGTTTGGACTTCATTTTCATCCACCTGTGCACC  
TATTGTAGTCTTTGGTTGGGTTAGGAGGAAGTGATCATTGTGTCAGCATCTGCTGGATGT  
GAGGACTTGCATTGTGAAAGCTTTGCTGTCCTTGATGTGATCATGGAATCTCTTTCTCAC  
TAGAGTCTATGTCACTCATTATACTCTGTGCAATGTCATTGAATGTCTTTACATGGGCTT  
ATATGCCTATGAAAATTGTAATAACAACCTTTCAGCAACGGATCTCTTGGCTCTCGCATCGA  
TGAAGGACGCAGCGAAATGCGATAAGTAATGTGAATTGCAGAATTCAGTGAATCATCGAA  
TCTTTGAACGCATCTTGCGCTCCTTGGTATTCCGAGGAGCATGCCTGTTTGAGTGTGATT  
AAATTCTCAACTCTCTTCTAC--TTTTTGTAAGAGAGCTTGGACTGTGGAGGCTTGCT  
GGCCACTTTTTGGGGTCAGCTCCTCTGAAATGCATTAGCGGAACCGTTTGCGATCTGCCA  
CAAGTGTGATAAGTTATCTACACTGGCGAGGGGATTGCTCTCTGTAATGTTGAGCTTCTA  
ATTGTCTCTACTTTGTGAGACTACTTTTGAATGCTTGACCTCAAATCAGGTAGGACTACC  
CGCTGAACTTAA

>ABC2-73

TTTCCGTAGGTGAACCTGCGGAAGGATCATTATTGAATTATGTTTCTAGATAGGTTGTAG  
CTGGCTCTTTTAGAGCATGTGCACGCCTGTTTGGACTTCATTTTCATCCACCTGTGCACC  
TATTGTAGTCTTTGGTTGGGTTAGGGGGAAGTGGTCATTGTGTCAGCATCTGCTGGATGT  
GAGGACTTGCATTGTGAAAGCTTTGCTGTCCTTGATGTGATCATGGAATCTCTTTCTCAC  
TAGAGTCTATGTCACTCATTATACTCTGTGCAATGTCATTGAATGTCTTTACATGGGCTT  
GTATGCCTATGAAAATTGTAATAACAACCTTTCAGCAACGGATCTCTTGGCTCTCGCATCGA  
TGAAGAACGCAGCGAAATGCGATAAGTAATGTGAATTGCAGAATTCAGTGAATCATCGAA  
TCTTTGAACGCATCTTGCGCTCCTTGGTATTCCGAGGAGCATGCCTGTTTGAGTGTGATT  
AAATTCTCAACTCTCTTCTAC--TTTTTGTAAGAGAGCTTGGACTGTGGAGGCTTGCT  
GGCCACTTTTTGGGGTCAGCTCCTCTGAAATGCATTAGCGGAACCGTTTGCGATCTGCCA  
CAAGTGTGATAAGTTATCTACACTGGCGAGGGGATTGCTCTCTGTAATGTTGAGCTTCTA  
ATTGTCTCTACTTTGTGAGACTACTTTTGAATGCTTGACCTCAAATCAGGTAGGACTACC  
CGCTGAACTTAA

>ABC4-71

TTTCCGTAGGTGAACCTGCGGAAGGATCATTATTGAATTATGTTTCTAGATAGGTTGTAG  
CTGGCTCTTTTAGAGCATGTGCACGCCTGTTTGGACTTCATTTTCATCCACCTGTGCACC  
TATTGTAGTCTTTGGTTGGGTTAGGAGGAAGTGGTCATTGTGTCAGCATCTGCTGGATGT



GAGGACTTGCATTGTGAAAGCTTTGCTGTCCTTGATGTGATCATGGAATCTCTTTCTCAC  
TAGAGTCTATGTCACCTATTATACTCTGTGCAATGTCATTGAATGTCTTTACATGGGCTT  
GTATGCCTATGAAAATTGTAATACAACCTTTCAGCAACGGATCTCTTGGCTCTCGCATCGA  
TGAAGAACGCAGCGAAATGCGATAAGTAATGTGAATTGCAGAATTCAGTGAATCATCGAA  
TCTTTGAACGCATCTTGCGCTCCTTGGTATTCCGAGGAGCATGCCTGTTTGAGTGTCAAT  
AAATTCTCAACTCTCTTCTAC--TTTTTGAAAAGAGAGCTTGGACTGTGGAGGCTTGCT  
GGCCACTTTTTGGGGTCAGCTCCTCTGAAATGCATTAGCGGAACCGTTTGCGATCTGCCA  
CAAGTGTGATAAGTTATCTACACTGGCGAGGGGATTGCTCTCTGTAATGTTTCAGCTTCTA  
ATTGTCTCTACTTTGTGAGACTACTTTTGAATGCTTGACCTCAAATCAGGTAGGACTACC  
CGCTGAACTTAA

>ABC3-34

TTTCCGTAGGTGAACCTGCGGAAGGATCATTATTGAATTATGTTTCTAGATAGGTTGTAG  
CTGGCTCTTTTAGAGCATGTGCACGCCTGTTTGGACTTCATTTTCATCCACCTGTGCACC  
TATTGTAGTCTTTGGTTGGGTTAGGAGGAAGTGGTCATTGTGTCAGCATCTGCTGGATGT  
GAGGACTTGCATTGTGAAAGCTTTGCTGTCCTTGATGTGATCATGGAATCTCTTTCTCAC  
TAGAGTCTATGTCACCTATTATACTCTGTGCAATGTCATTGAATGTCTTTACATGGGCTT  
GTATGCCTATGAAAATTGTAATACAACCTTTCAGCAACGGATCTCTTGGCTCTCGCATCGA  
TGAAGAACGCAGCGAAATGCGATAAGTAATGTGAATTGCAGAATTCAGTGAATCATCGAA  
TCTTTGAACGCATCTTGCGCTCCTTGGTATTCCGAGGAGCATGCCTGTTTGAGTGTCAAT  
AAATTCTCAACTCTCTTCTAC--TTTTTGAAAAGAGAGCTTGGACTGTGGAGGCTTGCT  
GGCCACTTTTTGGGGTCAGCTCCTCTGAAATGCATTAGCGGAACCGTTTGCAATCTGCCA  
CAAGTGTGATAAGTTATCTACACTGGCGAGGGGATTGCTCTCTGTAATGTTTCAGCTTCTA  
ATTGTCTCTACTTTGTGAGACTACTTTTGAATGCTTGACCTCAAATCAGGTAGGACTACC  
CGCTGAACTTAA

>ABC3-9

TTTCCGTAGGTGAACCTGCGGAAGGATCATTATTGAATTATGTTTCTAGATAGGTTGTAG  
CTGGCTCTTTTAGAGCATGTGCACGCCTGTTTGGACTTCATTTTCATCCACCTGTGCACC  
TATTGTAGTCTTTGGTTGGGTTAGGGGGAAGTGGTCATTGTGTCAGCATCTGCTGGATGT  
GAGGACTTGCATTGTGAAAGCTTTGCTGTCCTTGATGTGATCATGGAATCTCTTTCTCAC  
TAGAGTCTATGTCACCTATTATACTCTGTGCAATGTCATTGAATGTCTTTACATGGGCTT  
GTATGCCTATGAAAATTGTAATACAACCTTTCAGCAACGGATCTCTTGGCTCTCGCATCGA  
TGAAGAACGCAGCGAAATGCGATAAGTAATGTGAATTGCAGAATTCAGTGAATCATCGAA  
TCTTTGAACGCATCTTGCGCTCCTTGGTATTCCGAGGAGCATGCCTGTTTGAGTGTCAAT  
AAATTCTCAACTCTCTTCTAC--TTTTTGAAAAGAGAGCTTGGACTGTGGAGGCTTGCT  
GGCCACTTTTTGGGGTCAGCTCCTCTGAAATGCATTAGCGGAACCGTTTGCAATCTGCCA  
CAAGTGTGATAAGTTATCTACACTGGCGAGGGGATTGCTCTCTGTAATGTTTCAGCTTCTA  
ATTGTCTCTACTTTGTGAGACTACTTTTGAATGCTTGACCTCAAATCAGGTAGGACTACC  
CGCTGAACTTAA

>ABC3-40

TTTCCGTAGGTGAACCTGCGGAAGGATCATTATTGAATTATGTTTCTAGATAGGTTGTAG  
CTGGCTCTTTTAGAGCATGTGCACGCCTGTTTGGACTTCATTTTCATCCACCTGTGCACC  
TATTGTAGTCTTTGGTTGGGTTAGGAGGAAGTGATCATTGTATCAGCATCTGCTGGATGT  
GAGGACTTGCATTGTGAAAGCTTTGCTGTCCTTGATGTGATCATGGAATCTCTTTCTCAC  
TAGAGTCTATGTCACCTATTATACTCTGTGCAATGTCATTGAATGTCTTTACATGGGCTT  
GTATGCCTATGAAAATTGTAATACAACCTTTCAGCAACGGATCTCTTGGCTCTCGCATCGA  
TGAAGGACGCAGCGAAATGCGATAAGTAATGTGAATTGCAGAATTCAGTGAATCATCGAA  
TCTTTGAACGCATCTTGCGCTCCTTGGTATTCCGAGGAGCATGCCTGTTTGAGTGTCAAT  
AAATTCTCAACTCTCTTCTAC--TTTTTGAAAAGAGAGCTTGGACTGTGGAGGCTTGCT  
GGCCACTTTTTGGGGTCAGCTCCTCTGAAATGCATTAGCGGAACCGTTTGCGATCTGCCA  
CAAGTGTGATAAGTTATCTACACTGGCGAGGGGATTGCTCTCTGTAATGTTTCAGCTTCTA



ATTGTCTCTACTTTGTGAGACTACTTTTGAATGCTTGACCTCAAATCAGGTAGGACTACC  
CGCTGAACTTAA

>ABC9-44

TTTCCGTAGGTGAACCTGCGGAAGGATCATTATTGAATTATGTTTCTAGATAGGTTGTAG  
CTGGCTCTTTTAGAGCATGTGCACGCCTGTTTGGACTTCATTTTCATCCACCTGTGCACC  
TATTGTAGTCTTTGGTTGGGTTAGGAGGAAGTGATCATTGTATCAGCATCTGCTGGGAGT  
GAGGACTTGCATTGTGAAAGCTTTGCTGTCCTTGATGTGATCATGGAATCTTTTTCTCAC  
TAGAGTCTATGTCACTCATTATACTCTGTGCAATGTCATTGAATGTCTTTACATGGGCTT  
GTATGCCTATGAAAATTGTAATAACAACCTTTCAGCAACGGATCTCTTGGCTCTCGCATCGA  
TGAAGGACGCAGCGAAATGCGATAAGTAATGTGAATTGCAGAATTCAGTGAATCATCGAA  
TCTTTGAACGCATCTTGCCTCCTTGGTATTCCGAGGAGCATGCCTGTTTGAGTGTCAAT  
AAATTCTCAACTCTCTTATAC--TTTTGTAAAAGAGAGCTTGGACTGTGGAGGCTTGCT  
GGCCACTTTTTGGGGTCAGCTCCTCTGAAATGCATTAGCGGAACCGTTTGCGATCTGCCA  
CAAGTGTGATAAGTTATCTACACTGGCGAGGGGATTGCTCTCTGTAATGTTTCAGCTTCTA  
ATTGTCTCTACTTTGTGAGACAACTTTTGAATGCTTGACCTCAAATCAGGTAGGACTACC  
CGCTGAACTTAA

>ABC6-3

TTTCCGTAGGTGAACCTGCGGAAGGATCATTATTGAATTATGTTTCTAGATAGGTTGTAG  
CTGGCTC-TTTAGAGCATGTGCACGCCTGTTTGGACTTCATTTTCATCCACCTGTGCACC  
TATTGTAGTCTTTGGTTGGGTTAGGGGGAAGTGGTCATTGTGTCAGCATCTGCTGGATGT  
GAGGACTTGCATTGTGAAAGCTTTGCTGTCCTTGATGTGATCATGGAATCTCTTTCTCAC  
TAGAGTCTATGTCACTCATTATACTCTGTGCAATGTCATTGAATGTCTTTACATGGGCTT  
GTATGCCTATGAAAATTGTAATAACAACCTTTCAGCAACGGATCTCTTGGCTCTCGCATCGA  
TGAAGGACGCAGCGAAATGCGATAAGTAATGTGAATTGCAGAATTCAGTGAATCATCGAA  
TCTTTGAACGCATCTTGCCTCCTTGGTATTCCGAGGAGCATGCCTGTTTGAGTGTCAAT  
AAATTCTCAACTCTCTTATAC--TTTTGTAAAAGAGAGCTTGGACTGTGGAGGCTTGCT  
GGCCACTTTTTGGGGTCAGCTCCTCTGAAATGCATTAGCGGAACCGTTTGCAATCTGCCA  
CAAGTGTGATAAGTTATCTACACTGGCGAGGGGATTGCTCTCTGTAATGTTTCAGCTTCTA  
ATTGTCTCTACTTTGTGAGACAACTTTTGAATGCTTGACCTCAAATCAGGTAGGACTACC  
CGCTGAACTTAA

>ABC1-54

TTTCCGTAGGTGAACCTGCGGAAGGATCATTATTGAATTATGTTTCTAGATAGGTTGTAG  
CTGGCTC-TTTAGAGCATGTGTACGCCTGTTTGGACTTCATTTTCATCCACCTGTGCACC  
TATTGTAGTCTTTGGTTGGGTTAGGGGGAAGTGGTCATTGTGTCAGCATCTGCTGGATGT  
GAGGACTTGCATTGTGAAAGCTTTGCTGTCCTTGATGTGATCATGGAATCTCTTTCTCAC  
TAGAGTCTATGTCACTCATTATACTCTGTGCAATGTCATTGAATGTCTTTACATGGGCTT  
GTATGCCTATGAAAATTGTAATAACAACCTTTCAGCAACGGATCTCTTGGCTCTCGCATCGA  
TGAAGGACGCAGCGAAATGCGATAAGTAATGTGAATTGCAGAATTCAGTGAATCATCGAA  
TCTTTGAACGCATCTTGCCTCCTTGGTATTCCGAGGAGCATGCCTGTTTGAGTGTCAAT  
AAATTCTCAACTCTCTTATAC--TTTTGTAAAAGAGAGCTTGGACTGTGGAGGCTTGCT  
GGCCACTTTTTGGGGTCAGCTCCTCTGAAATGCATTAGCGGAACCGTTTGCAATCTGCCA  
CAAGTGTGATAAGTTATCTACACTGGCGAGGGGATTGCTCTCTGTAATGTTTCAGCTTCTA  
ATTGTCTCTACTTTGTGAGACAACTTTTGAATGCTTGACCTCAAATCAGGTAGGACTACC  
CGCTGAACTTAA

>ABC3-6

TTTCCGTAGGTGAACCTGCGGAAGGATCATTATTGAATTATGTTTCTAGATAGGTTGTAG  
CTGGCTC-TTTAGAGCATGTGCACGCCTGTTTGGACTTCATTTTCATCCACCTGTGCACC  
TATTGTAGTCTTTGGTTGGGTTAGGGGGAAGTGGTCATTGTGTCAGCATCTGCTGGATGT  
GAGGACTTGCATTGTGAAAGCTTTGCTGTCCTTGATGTGATCATGGAATCTCTTTCTCAC  
TAGAGTCTATGTCACTCATTATACTCTGTGCAATGTCATTGAATGTCTTTACATGGGCTT



GTATGCCTATGAAAATTGTAATACAACCTTTTCAGCAACGGATCTCTTGGCTCTCGCATCGA  
TGAAGGACGCAGCGAAATGCGATAAGTAATGTGAATTGCAGAATTCAGTGAATCATCGAA  
TCTTTGAACGCATCTTGCCTCCTTGGTATTCCGAGGAGCATGCCTGTTTGAGTGTCAAT  
AAATTCTCAACTCTCTTATAC--TTTTTGAAAAGAGAGCTTGGACTGTGGAGGCTTGCT  
GGCCACTTTTTGGGGTCAGCTCCTCTGAAATGCATTAGCGGAACCGTTTGCAATCTGCCA  
CAAGTGTGATAAGTTATCTACACTGGCGAGGGGATTACTCTCTGTAATGTTTCAGCTTCTA  
ATTGTCTCTACTTTGTGAGACAACCTTTGAATGCTTGACCTCAAATCAGGTAGGACTACC  
CGCTGAACTTAA

>ABC9-45

TTTCCGTAGGTGAACCTGCGGAAGGATCATTATTGAATTATGTTTCTAGATAGGTTGTAG  
CTGGCTC-TTTAGAGCATGTGCACGCCTGTTTGGACTTCATTTTCATCCACCTGTGCACC  
TATTGTAGTCTTTGGTTGGGTTAGGGGGAAGTGGTCATTGTGTCAGCATCTGCTGGATGT  
GAGGACTTGCATTGTGAAAGCTTTGCTGTCCTTGATGTGATCATGGAATCTCTTTCTCAC  
TAGAGTCTATGTCACCTCATTATACTCTGTCTGAATGTCATTGAATGTCTTTACATGGGCTT  
GTATGCCTATGAAAATTGTAATACAACCTTTTCAGCAACGGATCTCTTGGCTCTCGCATCGA  
TGAAGGACGCAACGAAATGCGATAAGTAATGTGAATTGCAGAATTCAGTGAATCATCGAA  
TCTTTGAACGCATCTTGCCTCCTTGGTATTCCGAGGAGCATGCCTGTTTGAGTGTCAAT  
AAATTCTCAACTCTCTTATAC--TTTTTGAAAAGAGAGCTTGGACTGTGGAGGCTTGCT  
GGCCACTTTTTGGGGTCAGCTCCTCTGAAATGCATTAGCGGAACCGTTTGCAATCTGCCA  
CAAGTGTGATAAGTTATCTACACTGGCGAGGGGATTGCTCTCTGTAATGTTTCAGCTTCTA  
ATTGTCTCTACTTTGTGAGACAACCTTTGAATGCTTGACCTCAAATCAGGTAGGACTACC  
CGCTGAACTTAA

>ABC3-63

TTTCCGTAGGTGAACCTGCGGAAGGATCATTATTGAATTATGTTTCTAGATAGGTTGTAG  
CTGGCTC-TTTAGAGCATGTGCACGCCTGTTTGGACTTCATTTTCATCCACCTGTGCACC  
TATTGTAGTCTTTGGTTGGGTTAGGAGGAAGTGGTCATTGTGTCAGCATCTGCTGGATGT  
GAGGACTTGCATTGTGAAAGCTTTGCTGTCCTTGATGTGATCATGGAATCTCTTTCTCAC  
TAGAGTCTATGTCACCTCATTATACTCTGTCTGAATGTCATTGAATGTCTTTACATGGGCTT  
ATATGCCTATGAAAATTGTAATACAACCTTTTCAGCAACGGATCTCTTGGCTCTCGCATCGA  
TGAAGAACGCAGCGAAATGCGATAAGTAATGTGAATTGCAGAATTCAGTGAATCATCGAA  
TCTTTGAACGCATCTTGCCTCCTTGGTATTCCGAGGAGCATGCCTGTTTGAGTGTCAAT  
AAATTCTCAACTCTCTTCTAC--TTTTTGAAAAGAGAGCTTGGACTGTGGAGGCTTGCT  
GGCCACTTTTTGGGGTCAGCTCCTCTGAAATGCATTAGCGGAACCGTTTGCGATCTGCCA  
CAAGTGTGATAAGTTATCTACACTGGCGAGGGGATTGCTCTCTGTAATGTTTCAGCTTCTA  
ATTGTCTCTACTTTGTGAGACAACCTTTGAATGCTTGACCTCAAATCAGGTAGGACTACC  
CGCTGAACTTAA

>ABC9-48

TTTCCGTAGGTGAACCTGCGGAAGGATCATTATTGAATTATGTTTCTAGATAGGTTGTAG  
CTGGCTC-TTTAGAGCATGTGCACGCCTGTTTGGACTTCATTTTCATCCACCTGTGCACC  
TATTGTAGTCTTTGGTTGGGTTAGGAGGAAGTGGTCATTGTGTCAGCATCTGCTGGATGT  
GAGGACTTGCATTGTGAAAGCTTTGCTGTCCTTGATGTGATCATGGAATCTCTTTCTCAC  
TAGAGTCTATGTCACCTCATTATACTCTGTCTGAATGTCATTGAATGTCTTTACATGGGCTT  
ATATGCCTATGAAAATTGTAATACAACCTTTTCAGCAACGGATCTCTTGGCTCTCGCATCGA  
TGAAGAACGCAGCGAAATGCGATAAGTAATGTGAATTGCAGAATTCAGTGAATCATCGAA  
TCTTTGAACGCATCTTGCCTCCTTGGTATTCCGAGGAGCATGCCTGTTTGAGTGTCAAT  
AAATTCTCAACTCTCTTCTAC--TTTTTGAAAAGAGAGCTTGGACTGTGGAGGCTTGCT  
GGCCACTTTTTGGGGTCAGCTCCTCTGAAATGCATTAGCGGAACCGTTTGCGATCTGCCA  
CAAGTGTGATAAGTTATCTACACTGGCGAGGGGATTGCTCTCTGTAATGTTTCAGCTTCTA  
ATTGTCTCTACTTTGTGAGACAACCTTTGAATGCTTGACCTCAAATCAGGTAGGACTACC  
CGCTGAACTTAA



>ABC11-3

TTTCCGTAGGTGAACCTGCGGAAGGATCATTATTGAATTATGTTTCTAGATAGGTTGTAG  
CTGGCTC-TTTAGAGCATGTGCACGCCTGTTTGGACTTCATTTTCATCCACCTGTGCACC  
TATTGTAGTCTTTGGTTGGGTTAGGAGGAAGTGGTCATTGTGTCAGCATCTGCTGGATGT  
GAGGACTTGCATTGTGAAAGCTTTGCTGTCCTTGATGTGATCATGGAATCTCTTTCTCAC  
TAGAGTCTATGTCACCTCATTATACTCTGTGCGAATGTCATTGAATGTCTTTACATGGGCTT  
ATATGCCTATGAAAATTGTAATACAACCTTTCAGCAACGGATCTCTTGGCTCTCGCATCGA  
TGAAGAACGCAGCGAAATGCGATAAGTAATGTGAATTGCAGAATTCAGTGAATCATCGAA  
TCTTTGAACGCATCTTGCGCTCCTTGGTATTCCGAGGAGCATGCCTGTTTGAGTGTCAAT  
AAATTCTCAACTCTCTTCTAC--TTTTGTAAAAGAGAGCTTGGACTGTGGAGGCTTGCT  
GGCCACTTTTTGGGGTCAGCTCCTCTGAAATGCATTAGCGGAACCGTTTGCGATCTGCCA  
CAAGTGTGATAAGTTATCTACACTGGCGAGGGGATTGCTCTCTGTAATGTTTCAGCTTCTA  
ATTGTCTCTACTTTGTGAGACAACTTTTGAATGCTTGACCTCAAATCAGGTAGGACTACC  
CGCTGAACTTAA

>ABC5-75

TTTCCGTAGGTGAACCTGCGGAAGGATCATTATTGAATTATGTTTCTAGATAGGTTGTAG  
CTGGCTC-TTTAGAGCATGTGCACGCCTGTTTGGACTTCATTTTCATCCACCTGTGCACC  
TATTGTAGTCTTTGGTTGGGTTAGGGGGAAGTGGTCATTGTGTCAGCATCTGCTGGATGT  
GAGGACTTGCATTGTGAAAGCTTTGCTGTCCTTGATGTGATCATGGAATCTCTTTCTCAC  
TAGAGTCTATGTCACCTCATTATACTCTGTGCGAATGTCATTGAATGTCTTTACATGGGCTT  
ATATGCCTATGAAAATTGTAATACAACCTTTCAGCAACGGATCTCTTGGCTCTCGCATCGA  
TGAAGAACGCAGCGAAATGCGATAAGTAATGTGAATTGCAGAATTCAGTGAATCATCGAA  
TCTTTGAACGCATCTTGCGCTCCTTGGTATTCCGAGGAGCATGCCTGTTTGAGTGTCAAT  
AAATTCTCAACTCTCTTCTAC--TTTTGTAAAAGAGAGCTTGGACTGTGGAGGCTTGCT  
GGCCACTTTTTGGGGTCAGCTCCTCTGAAATGCATTAGCGGAACCGTTTGCGATCTGCCA  
CAAGTGTGATAAGTTATCTACACTGGCGAGGGGATTGCTCTCTGTAATGTTTCAGCTTCTA  
ATTGTCTCTACTTTGTGAGACAACTTTTGAATGCTTGACCTCAAATCAGGTAGGACTACC  
CGCTGAACTTAA

>ABC5-39

TTTCCGTAGGTGAACCTGCGGAAGGATCATTATTGAATTATGTTTCTAGATAGGTTGTAG  
CTGGCTC-TTTAGAGCATGTGCACGCCTGTTTGGACTTCATTTTCATCCACCTGTGCACC  
TATTGTAGTCTTTGGTTGGGTTAGGGGGAAGTGGTCATTGTGTCAGCATCTGCTGGATGT  
GAGGACTTGCATTGTGAAAGCTTTGCTGTCCTTGATGTGATCATGGAATCTCTTTCTCAC  
TAGAGTCTATGTCACCTCATTATACTCTGTGCGAATGTCATTGAATGTCTTTACATGGGCTT  
GTATGCCTATGAAAATTGTAATACAACCTTTCAGCAACGGATCTCTTGGCTCTCGCATCGA  
TGAAGAACGCAGCGAAATGCGATAAGTAATGTGAATTGCAGAATTCAGTGAATCATCGAA  
TCTTTGAACGCATCTTGCGCTCCTTGGTATTCCGAGGAGCATGCCTGTTTGAGTGTCAAT  
AAATTCTCAACTCTCTTCTAC--TTTTGTAAAAGAGAGCTTGGACTGTGGAGGCTTGCT  
GGCCACTTTTTGGGGTCAGCTCCTCTGAAATGCATTAGCGGAACCGTTTGCGATCTGCCA  
CAAGTGTGATAAGTTATCTACACTGGCGAGGGGATTGCTCTCTGTAATGTTTCAGCTTCTA  
ATTGTCTCTACTTTGTGAGACAACTTTTGAATGCTTGACCTCAAATCAGGTAGGACTACC  
CGCTGAACTTAA

>ABC9-57

TTTCCGTAGGTGAACCTGCGGAAGGATCATTATTGAATTATGTTTCTAGATAGGTTGTAG  
CTGGCTC-TTTAGAGCATGTGCACGCCTGTTTGGACTTCATTTTCATCCACCTGTGCACC  
TATTGTAGTCTTTGGTTGGGTTAGGGGGAAGTGGTCATTGTGTCAGCATCTGCTGGATGT  
GAGGACTTGCATTGTGAAAGCTTTGCTGTCCTTGATGTGATCATGGAATCTCTTTCTCAC  
TAGAGTCTATGTCACCTCATTATACTCTGTGCGAATGTCATTGAATGTCTTTACATGGGCTT  
GTATGCCTATGAAAATTGTAATACAACCTTTCAGCAACGGATCTCTTGGCTCTCGCATCGA  
TGAAGAACGCAGCGAAATGCGATAAGTAATGTGAATTGCAGAATTCAGTGAATCATCGAA



TCTTTGAACGCATCTTGCGCTCCTTGGTATTCCGAGGAGCATGCCTGTTTGAGTGTCAATT  
AAATTCTCAACTCTCTTCTAC--TTTTTGAAAAGAGAGCTTGGACTGTGGAGGCTTGCT  
GGCCACTTTTTGGGGTCAGCTCCTCTGAAATGCATTAGCGGAACCGTTTGCGATCTGCCA  
CAAGTGTGATAAGTTATCTACACTGGCGAGGGGATTGCTCTCTGTAATGTTTCAGCTTCTA  
ATTGTCTCTACTTTGTGAGACAACTTTGAATGCTTGACCTCAAATCAGGTAGGACTACC  
CGCTGAACTTAA

>ABC8-61

TTTCCGTAGGTGAACCTGCGGAAGGATCATTATTGAATTATGTTTCTAGATAGGTTGTAG  
CTGGCTC-TTTAGAGCATGTGCACGCCTGTTTGGACTTCATTTTCATCCACCTGTGCACC  
TATTGTAGTCTTTGGTTGGGTTAGGGGGAAGTGGTCATTGTGTCAGCATCTGCTGGATGT  
GAGGACTTGCAATTGTGAAAGCTTTGCTGTCTTGATGTGATCATGGAATCTCTTTCTCAC  
TAGAGTCTATGTCACTCATTATACTCTGTGCAATGTCATTGAATGTCTTTACATGGGCTT  
GTATGCCTATGAAAATTGTAATACAACCTTTAGCAACGGATCTCTTGGCTCTCGCATCGA  
TGAAGGACGCAGCGAAATGCGATAAGTAATGTGAATTGCAGAATTCAGTGAATCATCGAA  
TCTTTGAACGCATCTTGCGCTCCTTGGTATTCCGAGGAGCATGCCTGTTTGAGTGTCAATT  
AAATTCTCAACTCTCTTCTAC--TTTTTGAAAAGAGAGCTTGGACTGTGGAGGCTTGCT  
GGCCACTTTTTGGGGTCAGCTCCTCTGAAATGCATTAGCGGAACCGTTTGCGATCTGCCA  
CAAGTGTGATAAGTTATCTACACTGGCGAGGGGATTGCTCTCTGTAATGTTTCAGCTTCTA  
ATTGTCTCTACTTTGTGAGACAACTTTGAATGCTTGACCTCAAATCAGGTAGGACTACC  
CGCTGAACTTAA

>ABC3-33

TTTCCGTAGGTGAACCTGCGGAAGGATCATTATTGAATTATGTTTCTAGATAGGTTGTAG  
CTGGCTC-TTTAGAGCATGTGCACGCCTGTTTGGACTTCATTTTCATCCACCTGTGCACC  
TATTGTAGTCTTTGGTTGGGTTAGGGGGAAGTGGTCATTGTGTCAGCATCTGCTGGATGT  
GAGGACTTGCAATTGTGAAAGCTTTGCTGTCTTGATGTGATCATGGAATCTCTTTCTCAC  
TAGAGTCTATGTCACTCATTATACTCTGTGCAATGTCATTGAATGTCTTTACATGGGCTT  
GTATGCCTATGAAAATTGTAATACAACCTTTAGCAACGGATCTCTTGGCTCTCGCATCGA  
TGAAGGACGCAGCGAAATGCGATAAGTAATGTGAATTGCAGAATTCAGTGAATCATCGAA  
TCTTTGAACGCATCTTGCGCTCCTTGGTATTCCGAGGAGCATGCCTGTTTGAGTGTCAATT  
AAATTCTCAACTCTCTTCTAC--TTTTTGAAAAGAGAGCTTGGACTGTGGAGGCTTGCT  
GGCCACTTTTTGGGGTCAGCTCCTCTGAAATGCATTAGCGGAACCGTTTGCAATCTGCCA  
CAAGTGTGATAAGTTATCTACACTGGCGAGGGGATTGCTCTCTGTAATGTTTCAGCTTCTA  
ATTGTCTCTACTTTGTGAGACAACTTTGAATGCTTGACCTCAAATCAGGTAGGACTACC  
CGCTGAACTTAA

>ABC3-53

TTTCCGTAGGTGAACCTGCGGAAGGATCATTATTGAATTATGTTTCTAGATAGGTTGTAG  
CTGGCTC-TTTAGAGCATGTGCACGCCTGTTTGGACTTCATTTTCATCCACCTGTGCACC  
TATTGTAGTCTTTGGTTGGGTTAGGGGGAAGTGGTCATTGTGTCAGCATCTGCTGGATGT  
GAGGACTTGCAATTGTGAAAGCTTTGCTGTCTTGATGTGATCATGGAATCTCTTTCTCAC  
TAGAGTCTATGTCACTCATTATACTCTGTGCAATGTCATTGAATGTCTTTACATGGGCTT  
GTATGCCTATGAAAATTGTAATACAACCTTTAGCAACGGATCTCTTGGCTCTCGCATCGA  
TGAAGGACGCAGCGAAATGCGATAAGTAATGTGAATTGCAGAATTCAGTGAATCATCGAA  
TCTTTGAACGCATCTTGCGCTCCTTGGTATTCCGAGGAGCATGCCTGTTTGAGTGTCAATT  
AAATTCTCAACTCTCTTCTAC--TTTTTGAAAAGAGAGCTTGGACTGTGGAGGCTTGCT  
GGCCACTTTTTGGGGTCAGCTCCTCTGAAATGCATTAGCGGAACCGTTTGCAATCTGCCA  
CAAGTGTGATCAGTTATCTACACTGGCGAGGGGATTGCTCTCTGTAATGTTTCAGCTTCTA  
ATTGTCTCTACTTTGTGAGACAACTTTGAATGCTTGACCTCAAATCAGGTAGGACTACC  
CGCTGAACTTAA

>ABC1-5

TTTCCGTAGGTGAACCTGCGGAAGGATCATTATTGAATTATGTTTCTAGATAGGTTGTAG



CTGGCTC-TTTAGAGCATGTGCACGCCTGTTTGGACTTCATTTTCATCCACCTGTGCACC  
TATTGTAGTCTTTGGTTGGGTTAGGAGGAAGTGGTCATTGTGTCAGCATCTGCTGGATGT  
GAGGACTTGCATTGTGAAAGCTTTGCTGTCCTTGATGTGATCATGGAATCTCTTTCTCAC  
TAGAGTCTATGTCACCTATTATACTCTGTGCGAATGTCATTGAATGTCTTTACATGGGCTT  
ATATGCCTATGAAAATTGTAATACAACCTTTCAGCAACGGATCTCTTGGCTCTCGCATCGA  
TGAAGAACGCAGCGAAATGCGATAAGTAATGTGAATTGCAGAATTCAGTGAATCATCGAA  
TCTTTGAACGCATCTTGCCTCCTTGGTATTCCGAGGAGCATGCCTGTTTGAGTGTCAAT  
AAATTCTCAACTCTCTTCTAC--TTTTTGTAAGAGAGCTTGGACTGTGGAGGCTTGCT  
GGCCACTTTTTGGGGTCAGCTCCTCTGAAATGCATTAGCGGAACCGTTTGCGATCTGCCA  
CAAGTGTGATAAGTTATCTACACTGGCGAGGGGATTGCTCTCTGTAATGTTGAGCTTCTA  
ATTGTCTCTACTTTGTGAGACTACTTTTGAATGCTTGACCTCAAATCAGGTAGGACTACC  
CGCTGAACTTAA

>ABC5-49

TTTCCGTAGGTGAACCTGCGGAAGGATCATTATTGAATTATGTTTCTAGATAGGTTGTAG  
CTGGCTC-TTTAGAGCATGTGCACGCCTGTTTGGACTTCATTTTCATCCACCTGTGCACC  
TATTGTAGTCTTTGGTTGGGTTAGGAGGAAGTGGTCATTGTGTCAGCATCTGCTGGATGT  
GAGGACTTGCATTGTGAAAGCTTTGCTGTCCTTGATGTGATCATGGAATCTCTTTCTCAC  
TAGAGTCTATGTCACCTATTATACTCTGTGCGAATGTCATTGAATGTCTTTACATGGGCTT  
ATATGCCTATGAAAATTGTAATACAACCTTTCAGCAACGGATCTCTTGGCTCTCGCATCGA  
TGAAGAACGCAGCGAAATGCGATAAGTAATGTGAATTGCAGAATTCAGTGAATCATCGAA  
TCTTTGAACGCATCTTGCCTCCTTGGTATTCCGAGGAGCATGCCTGTTTGAGTGTCAAT  
AAATTCTCAACTCTCTTCTAC--TTTTTGTAAGAGAGCTTGGACTGTGGAGGCTTGCT  
GGCCACTTTTTGGGGTCAGCTCCTCTGAAATGCATTAGCGGAACCGTTTGCGATCTGCCA  
CAAGTGTGATAAGTTATCTACACTGGCGAGGGGATTGCTCTCTGTAATGTTGAGCTTCTA  
ATTGTCTCTACTTTGTGAGACTACTTTTGAATGCTTGACCTCAAATCAGGTAGGACTACC  
CGCTGAACTTAA

>ABC3-48

TTTCCGTAGGTGAACCTGCGGAAGGATCATTATTGAATTATGTTTCTAGATAGGTTGTAG  
CTGGCTC-TTTAGAGCATGTGCACGCCTGTTTGGACTTCATTTTCATCCACCTGTGCACC  
TATTGTAGTCTTTGGTTGGGTTAGGAGGAAGTGGTCATTGTGTCAGCATCTGCTGGATGT  
GAGGACTTGCATTGTGAAAGCTTTGCTGTCCTTGATGTGATCATGGAATCTCTTTCTCAC  
TAGAGTCTATGTCACCTATTATACTCTGTGCGAATGTCATTGAATGTCTTTACATGGGCTT  
ATATGCCTATGAAAATTGTAATACAACCTTTCAGCAACGGATCTCTTGGCTCTCGCATCGA  
TGAAGAACGCAGCGAAATGCGATAAGTAATGTGAATTGCAGAATTCAGTGAATCATCGAA  
TCTTTGAACGCATCTTGCCTCCTTGGTATTCCGAGGAGCATGCCTGTTTGAGTGTCAAT  
AAATTCTCAACTCTCTTCTAC--TTTTTGTAAGAGAGCTTGGACTGTGGAGGCTTGCT  
GGCCACTTTTTGGGGTCAGCTCCTCTGAAATGCATTAGCGGAACCGTTTGCGATCTGCCA  
CAAGTGTGATAAGTTATCTACACTGGCGAGGGGATTGCTCTCTGTAATGTTGAGCTTCTA  
ATTGTCTCTACTTTGTGAGACTACTTTTGAATGCTTGACCTCAAATCAGGTAGGACTACC  
CGCTGAACTTAA

>ABC1-60

TTTCCGTAGGTGAACCTGCGGAAGGATCATTATTGAATTATGTTTCTAGATAGGTTGTAG  
CTGGCTC-TTTAGAGCATGTGCACGCCTGTTTGGACTTCATTTTCATCCACCTGTGCACC  
TATTGTAGTCTTTGGTTGGGTTAGGAGGAAGTGGTCATTGTGTCAGCATCTGCTGGATGT  
GAGGACTTGCATTGTGAAAGCTTTGCTGTCCTTGATGTGATCATGGAATCTCTTTCTCAC  
TAGAGTCTATGTCACCTATTATACTCTGTGCGAATGTCATTGAATGTCTTTACATGGGCTT  
ATATGCCTATGAAAATTGTAATACAACCTTTCAGCAACGGATCTCTTGGCTCTCGCATCGA  
TGAAGAACGCAGCGAAATGCGATAAGTAATGTGAATTGCAGAATTCAGTGAATCATCGAA  
TCTTTGAACGCATCTTGCCTCCTTGGTATTCCGAGGAGCATGCCTGTTTGAGTGTCAAT  
AAATTCTCAACTCTCTTCTAC--TTTTTGTAAGAGAGCTTGGACTGTGGAGGCTTGCT



GGCCACTTTTTGGGGTCAGCTCCTCTGAAATGCATTAGCGGAACCGTTTGCGATCTGCCA  
CAAGTGTGATAAGTTATCTACACTGGCGAGGGGATTGCTCTCTGTAATGTTGAGCTTCTA  
ATTGTCTCTACTTTGTGAGACTACTTTTGAATGCTTGACCTCAAATCAGGTAGGACTACC  
CGCTGAACTTAA

>ABC1-47

TTTCCGTAGGTGAACCTGCGGAAGGATCATTATTGAATTATGTTTCTAGATAGGTTGTAG  
CTGGCTC-TTTAGAGCATGTGCACGCCTGTTTGGACTTCATTTTCATCCACCTGTGCACC  
TATTGTAGTCTTTGGTTGGGTTAGGAGGAAGTGGTCATTGTGTCAGCATCTGCTGGATGT  
GAGGACTTGCATTGTGAAAGCTTTGCTGTCCTTGATGTGATCATGGAATCTCTTTCTCAC  
TAGAGTCTATGTCACTCATTATACTCTGTGCAATGTCATTGAATGTCTTTACATGGGCTT  
ATATGCCTATGAAAATTGTAATAACAACCTTTGAGCAACGGATCTCTTGGCTCTCGCATCGA  
TGAAGAACGCAGCGAAATGCGATAAGTAATGTGAATTGCAGAATTCAGTGAATCATCGAA  
TCTTTGAACGCATCTTGCGCTCCTTGGTATTCCGAGGAGCATGCCTGTTTGAGTGTGATT  
AAATTCTCAACTCTCTTCTAC--TTTTTGTAAGAGAGCTTGGACTGTGGAGGCTTGCT  
GGCCACTTTTTGGGGTCAGCTCCTCTGAAATGCATTAGCGGAACCGTTTGCGATCTGCCA  
CAAGTGTGATAAGTTATCTACACTGGCGAGGGGATTGCTCTCTGTAATGTTGAGCTTCTA  
ATTGTCTCTACTTTGTGAGACTACTTTTGAATGCTTGACCTCAAATCAGGTAGGACTACC  
CGCTGAACTTAA

>ABC12-48

TTTCCGTAGGTGAACCTGCGGAAGGATCATTATTGAATTATGTTTCTAGATAGGTTGTAG  
CTGGCTC-TTTAGAGCATGTGCACGCCTGTTTGGACTTCATTTTCATCCACCTGTGCACC  
TATTGTAGTCTTTGGTTGGGTTAGGAGGAAGTGGTCATTGTGTCAGCATCTGCTGGATGT  
GAGGACTTGCATTGTGAAAGCTTTGCTGTCCTTGATGTGATCATGGAATCTCTTTCTCAC  
TAGAGTCTATGTCACTCATTATACTCTGTGCAATGTCATTGAATGTCTTTACATGGGCTT  
ATATGCCTATGAAAATTGTAATAACAACCTTTGAGCAACGGATCTCTTGGCTCTCGCATCGA  
TGAAGAACGCAGCGAAATGCGATAAGTAATGTGAATTGCAGAATTCAGTGAATCATCGAA  
TCTTTGAACGCATCTTGCGCTCCTTGGTATTCCGAGGAGCATGCCTGTTTGAGTGTGATT  
AAATTCTCAACTCTCTTCTAC--TTTTTGTAAGAGAGCTTGGACTGTGGAGGCTTGCT  
GGCCACTTTTTGGGGTCAGCTCCTCTGAAATGCATTAGCGGAACCGTTTGCGATCTGCCA  
CAAGTGTGATAAGTTATCTACACTGGCGAGGGGATTGCTCTCTGTAATGTTGAGCTTCTA  
ATTGTCTCTACTTTGTGAGACTACTTTTGAATGCTTGACCTCAAATCAGGTAGGACTACC  
CGCTGAACTTAA

>ABC7-32

TTTCCGTAGGTGAACCTGCGGAAGGATCATTATTGAATTATGTTTCTAGATAGGTTGTAG  
CTGGCTC-TTTAGAGCATGTGCACGCCTGTTTGGACTTCATTTTCATCCACCTGTGCACC  
TATTGTAGTCTTTGGTTGGGTTAGGAGGAAGTGGTCATTGTGTCAGCATCTGCTGGATGT  
GAGGACTTGCATTGTGAAAGCTTTGCTGTCCTTGATGTGATCATGGAATCTCTTTCTCAC  
TAGAGTCTATGTCACTCATTATACTCTGTGCAATGTCATTGAATGTCTTTACATGGGCTT  
ATATGCCTATGAAAATTGTAATAACAACCTTTGAGCAACGGATCTCTTGGCTCTCGCATCGA  
TGAAGAACGCAGCGAAATGCGATAAGTAATGTGAATTGCAGAATTCAGTGAATCATCGAA  
TCTTTGAACGCATCTTGCGCTCCTTGGTATTCCGAGGAGCATGCCTGTTTGAGTGTGATT  
AAATTCTCAACTCTCTTCTAC--TTTTTGTAAGAGAGCTTGGACTGTGGAGGCTTGCT  
GGCCACTTTTTGGGGTCAGCTCCTCTGAAATGCATTAGCGGAACCGTTTGCGATCTGCCA  
CAAGTGTGATAAGTTATCTACACTGGCGAGGGGATTGCTCTCTGTAATGTTGAGCTTCTA  
ATTGTCTCTACTTTGTGAGACTACTTTTGAATGCTTGACCTCAAATCAGGTAGGACTACC  
CGCTGAACTTAA

>ABC8-10

TTTCCGTAGGTGAACCTGCGGAAGGATCATTATTGAATTATGTTTCTAGATAGGTTGTAG  
CTGGCTC-TTTAGAGCATGTGCACGCCTGTTTGGACTTCATTTTCATCCACCTGTGCACC  
TATTGTAGTCTTTGGTTGGGTTAGGAGGAAGTGGTCATTGTGTCAGCATCTGCTGGATGT



GAGGACTTGCATTGTGAAAGCTTTGCTGTCCTTGATGTGATCATGGAATCTCTTTCTCAC  
TAGAGTCTATGTCACCTATTATACTCTGTGCAATGTCATTGAATGTCTTTACATGGGCTT  
ATATGCCTATGAAAATTGTAATACAACCTTTCAGCAACGGATCTCTTGGCTCTCGCATCGA  
TGAAGAACGCAGCGAAATGCGATAAGTAATGTGAATTGCAGAATTCAGTGAATCATCGAA  
TCTTTGAACGCATCTTGCGCTCCTTGGTATTCCGAGGAGCATGCCTGTTTGAGTGTCAAT  
AAATTCTCAACTCTCTTCTAC--TTTTTGAAAAGAGAGCTTGGACTGTGGAGGCTTGCT  
GGCCACTTTTTGGGGTCAGCTCCTCTGAAATGCATTAGCGGAACCGTTTGCGATCTGCCA  
CAAGTGTGATAAGTTATCTACACTGGCGAGGGGATTGCTCTCTGTAATGTTTCAGCTTCTA  
ATTGTCTCTACTTTGTGAGACTACTTTTGAATGCTTGACCTCAAATCAGGTAGGACTACC  
CGCTGAACTTAA

>ABC12-5

TTTCCGTAGGTGAACCTGCGGAAGGATCATTATTGAATTATGTTTCTAGATAGGTTGTAG  
CTGGCTC-TTTAGAGCATGTGCACGCCTGTTTGGACTTCATTTTCATCCACCTGTGCACC  
TATTGTAGTCTTTGGTTGGGTTAGGAGGAAGTGGTCATTGTGTCAGCATCTGCTGGATGT  
GAGGACTTGCATTGTGAAAGCTTTGCTGTCCTTGATGTGATCATGGAATCTCTTTCTCAC  
TAGAGTCTATGTCACCTATTATACTCTGTGCAATGTCATTGAATGTCTTTACATGGGCTT  
ATATGCCTATGAAAATTGTAATACAACCTTTCAGCAACGGATCTCTTGGCTCTCGCATCGA  
TGAAGAACGCAGCGAAATGCGATAAGTAATGTGAATTGCAGAATTCAGTGAATCATCGAA  
TCTTTGAACGCATCTTGCGCTCCTTGGTATTCCGAGGAGCATGCCTGTTTGAGTGTCAAT  
AAATTCTCAACTCTCTTCTAC--TTTTTGAAAAGAGAGCTTGGACTGTGGAGGCTTGCT  
GGCCACTTTTTGGGGTCAGCTCCTCTGAAATGCATTAGCGGAACCGTTTGCGATCTGCCA  
CAAGTGTGATAAGTTATCTACACTGGCGAGGGGATTGCTCTCTGTAATGTTTCAGCTTCTA  
ATTGTCTCTACTTTGTGAGACTACTTTTGAATGCTTGACCTCAAATCAGGTAGGACTACC  
CGCTGAACTTAA

>ABC11-46

TTTCCGTAGGTGAACCTGCGGAAGGATCATTATTGAATTATGTTTCTAGATAGGTTGTAG  
CTGGCTC-TTTAGAGCATGTGCACGCCTGTTTGGACTTCATTTTCATCCACCTGTGCACC  
TATTGTAGTCTTTGGTTGGGTTAGGAGGAAGTGGTCATTGTGTCAGCATCTGCTGGATGT  
GAGGACTTGCATTGTGAAAGCTTTGCTGTCCTTGATGTGATCATGGAATCTCTTTCTCAC  
TAGAGTCTATGTCACCTATTATACTCTGTGCAATGTCATTGAATGTCTTTACATGGGCTT  
ATATGCCTATGAAAATTGTAATACAACCTTTCAGCAACGGATCTCTTGGCTCTCGCATCGA  
TGAAGAACGCAGCGAAATGCGATAAGTAATGTGAATTGCAGAATTCAGTGAATCATCGAA  
TCTTTGAACGCATCTTGCGCTCCTTGGTATTCCGAGGAGCATGCCTGTTTGAGTGTCAAT  
AAATTCTCAACTCTCTTCTAC--TTTTTGAAAAGAGAGCTTGGACTGTGGAGGCTTGCT  
GGCCACTTTTTGGGGTCAGCTCCTCTGAAATGCATTAGCGGAACCGTTTGCGATCTGCCA  
CAAGTGTGATAAGTTATCTACACTGGCGAGGGGATTGCTCTCTGTAATGTTTCAGCTTCTA  
ATTGTCTCTACTTTGTGAGACTACTTTTGAATGCTTGACCTCAAATCAGGTAGGACTACC  
CGCTGAACTTAA

>ABC10-25

TTTCCGTAGGTGAACCTGCGGAAGGATCATTATTGAATTATGTTTCTAGATAGGTTGTAG  
CTGGCTC-TTTAGAGCATGTGCACGCCTGTTTGGACTTCATTTTCATCCACCTGTGCACC  
TATTGTAGTCTTTGGTTGGGTTAGGAGGAAGTGGTCATTGTGTCAGCATCTGCTGGATGT  
GAGGACTTGCATTGTGAAAGCTTTGCTGTCCTTGATGTGATCATGGAATCTCTTTCTCAC  
TAGAGTCTATGTCACCTATTATACTCTGTGCAATGTCATTGAATGTCTTTACATGGGCTT  
ATATGCCTATGAAAATTGTAATACAACCTTTCAGCAACGGATCTCTTGGCTCTCGCATCGA  
TGAAGAACGCAGCGAAATGCGATAAGTAATGTGAATTGCAGAATTCAGTGAATCATCGAA  
TCTTTGAACGCATCTTGCGCTCCTTGGTATTCCGAGGAGCATGCCTGTTTGAGTGTCAAT  
AAATTCTCAACTCTCTTCTAC--TTTTTGAAAAGAGAGCTTGGACTGTGGAGGCTTGCT  
GGCCACTTTTTGGGGTCAGCTCCTCTGAAATGCATTAGCGGAACCGTTTGCGATCTGCCA  
CAAGTGTGATAAGTTATCTACACTGGCGAGGGGATTGCTCTCTGTAATGTTTCAGCTTCTA



ATTGTCTCTACTTTGTGAGACTACTTTTGAATGCTTGACCTCAAATCAGGTAGGACTACC  
CGCTGAACTTAA

>ABC11-25

TTTCCGTAGGTGAACCTGCGGAAGGATCATTATTGAATTATGTTTCTAGATAGGTTGTAG  
CTGGCTC-TTTAGAGCATGTGCACGCCTGTTTGGACTTCATTTTCATCCACCTGTGCACC  
TATTGTAGTCTTTGGTTGGGTTAGGAGGAAGTGGTCATTGTGTCAGCATCTGCTGGATGT  
GAGGACTTGCATTGTGAAAGCTTTGCTGTCCTTGATGTGATCATGGAATCTCTTTCTCAC  
TAGAGTCTATGTCACCTATTATACTCTGTGCAATGTCATTGAATGTCTTTACATGGGCTT  
ATATGCCTATGAAAATTGTAATAACAACCTTTCAGCAACGGATCTCTTGGCTCTCGCATCGA  
TGAAGAACGCAGCGAAATGCGATAAGTAATGTGAATTGCAGAATTCAGTGAATCATCGAA  
TCTTTGAACGCATCTTGCCTCCTTGGTATTCCGAGGAGCATGCCTGTTTGAGTGTCAAT  
AAATTCTCAACTCTCTTCTAC--TTTTGTAAAAGAGAGCTTGGACTGTGGAGGCTTGCT  
GGCCACTTTTTGGGGTCAGCTCCTCTGAAATGCATTAGCGGAACCGTTTGCGATCTGCCA  
CAAGTGTGATAAGTTATCTACACTGGCGAGGGGATTGCTCTCTGTAATGTTTCAGCTTCTA  
ATTGTCTCTACTTTGTGAGACTACTTTTGAATGCTTGACCTCAAATCAGGTAGGACTACC  
CGCTGAACTTAA

>ABC8-18

TTTCCGTAGGTGAACCTGCGGAAGGATCATTATTGAATTATGTTTCTAGATAGGTTGTAG  
CTGGCTC-TTTAGAGCATGTGCACGCCTGTTTGGACTTCATTTTCATCCACCTGTGCACC  
TATTGTAGTCTTTGGTTGGGTTAGGAGGAAGTGGTCATTGTGTCAGCATCTGCTGGATGT  
GAGGACTTGCATTGTGAAAGCTTTGCTGTCCTTGATGTGATCATGGAATCTCTTTCTCAC  
TAGAGTCTATGTCACCTATTATACTCTGTGCAATGTCATTGAATGTCTTTACATGGGCTT  
ATATGCCTATGAAAATTGTAATAACAACCTTTCAGCAACGGATCTCTTGGCTCTCGCATCGA  
TGAAGAACGCAGCGAAATGCGATAAGTAATGTGAATTGCAGAATTCAGTGAATCATCGAA  
TCTTTGAACGCATCTTGCCTCCTTGGTATTCCGAGGAGCATGCCTGTTTGAGTGTCAAT  
AAATTCTCAACTCTCTTCTAC--TTTTGTAAAAGAGAGCTTGGACTGTGGAGGCTTGCT  
GGCCACTTTTTGGGGTCAGCTCCTCTGAAATGCATTAGCGGAACCGTTTGCGATCTGCCA  
CAAGTGTGATAAGTTATCTACACTGGCGAGGGGATTGCTCTCTGTAATGTTTCAGCTTCTA  
ATTGTCTCTACTTTGTGAGACTACTTTTGAATGCTTGACCTCAAATCAGGTAGGACTACC  
CGCTGAACTTAA

>ABC8-58

TTTCCGTAGGTGAACCTGCGGAAGGATCATTATTGAATTATGTTTCTAGATAGGTTGTAG  
CTGGCTC-TTTAGAGCATGTGCACGCCTGTTTGGACTTCATTTTCATCCACCTGTGCACC  
TATTGTAGTCTTTGGTTGGGTTAGGAGGAAGTGGTCATTGTGTCAGCATCTGCTGGATGT  
GAGGACTTGCATTGTGAAAGCTTTGCTGTCCTTGATGTGATCATGGAATCTCTTTCTCAC  
TAGAGTCTATGTCACCTATTATACTCTGTGCAATGTCATTGAATGTCTTTACATGGGCTT  
ATATGCCTATGAAAATTGTAATAACAACCTTTCAGCAACGGATCTCTTGGCTCTCGCATCGA  
TGAAGAACGCAGCGAAATGCGATAAGTAATGTGAATTGCAGAATTCAGTGAATCATCGAA  
TCTTTGAACGCATCTTGCCTCCTTGGTATTCCGAGGAGCATGCCTGTTTGAGTGTCAAT  
AAATTCTCAACTCTCTTCTAC--TTTTGTAAAAGAGAGCTTGGACTGTGGAGGCTTGCT  
GGCCACTTTTTGGGGTCAGCTCCTCTGAAATGCATTAGCGGAACCGTTTGCGATCTGCCA  
CAAGTGTGATAAGTTATCTACACTGGCGAGGGGATTGCTCTCTGTAATGTTTCAGCTTCTA  
ATTGTCTCTACTTTGTGAGACTACTTTTGAATGCTTGACCTCAAATCAGGTAGGACTACC  
CGCTGAACTTAA

>ABC3-14

TTTCCGTAGGTGAACCTGCGGAAGGATCATTATTGAATTATGTTTCTAGATAGGTTGTAG  
CTGGCTC-TTTAGAGCATGTGCACGCCTGTTTGGACTTCATTTTCATCCACCTGTGCACC  
TATTGTAGTCTTTGGTTGGGTTAGGAGGAAGTGGTCATTGTGTCAGCATCTGCTGGATGT  
GAGGACTTGCATTGTGAAAGCTTTGCTGTCCTTGATGTGATCATGGAATCTCTTTCTCAC  
TAGAGTCTATGTCACCTATTATACTCTGTGCAATGTCATTGAATGTCTTTACATGGGCTT



ATATGCCTATGAAAATTGTAATACAACCTTTTCAGCAACGGATCTCTTGGCTCTCGCATCGA  
TGAAGAACGCAGCGAAATGCGATAAGTAATGTGAATTGCAGAATTCAGTGAATCATCGAA  
TCTTTGAACGCATCTTGCCTCCTTGGTATTCCGAGGAGCATGCCTGTTTGAGTGTCAAT  
AAATTCTCAACTCTCTTCTAC--TTTTTGAAAAGAGAGCTTGGACTGTGGAGGCTTGCT  
GGCCACTTTTTGGGGTCAGCTCCTCTGAAATGCATTAGCGGAACCGTTTGCGATCTGCCA  
CAAGTGTGATAAGTTATCTACACTGGCGAGGGGATTGCTCTCTGTAATGTTTCAGCTTCTA  
ATTGTCTCTACTTTGTGAGACTACTTTTGAATGCTTGACCTCAAATCAGGTAGGACTACC  
CGCTGAACTTAA

>ABC3-1

TTTCCGTAGGTGAACCTGCGGAAGGATCATTATTGAATTATGTTTCTAGATAGGTTGTAG  
CTGGCTC-TTTAGAGCATGTGCACGCCTGTTTGGACTTCATTTTCATCCACCTGTGCACC  
TATTGTAGTCTTTGGTTGGGTTAGGAGGAAGTGGTCATTGTGTCAGCATCTGCTGGATGT  
GAGGACTTGCATTGTGAAAGCTTTGCTGTCCTTGATGTGATCATGGAATCTCTTTCTCAC  
TAGAGTCTATGTCACCTCATTATACTCTGTCTGAATGTCATTGAATGTCTTTACATGGGCTT  
ATATGCCTATGAAAATTGTAATACAACCTTTTCAGCAACGGATCTCTTGGCTCTCGCATCGA  
TGAAGAACGCAGCGAAATGCGATAAGTAATGTGAATTGCAGAATTCAGTGAATCATCGAA  
TCTTTGAACGCATCTTGCCTCCTTGGTATTCCGAGGAGCATGCCTGTTTGAGTGTCAAT  
AAATTCTCAACTCTCTTCTAC--TTTTTGAAAAGAGAGCTTGGACTGTGGAGGCTTGCT  
GGCCACTTTTTGGGGTCAGCTCCTCTGAAATGCATTAGCGGAACCGTTTGCGATCTGCCA  
CAAGTGTGATAAGTTATCTACACTGGCGAGGGGATTGCTCTCTGTAATGTTTCAGCTTCTA  
ATTGTCTCTACTTTGTGAGACTACTTTTGAATGCTTGACCTCAAATCAGGTAGGACTACC  
CGCTGAACTTAA

>ABC3-46

TTTCCGTAGGTGAACCTGCGGAAGGATCATTATTGAATTATGTTTCTAGATAGGTTGTAG  
CTGGCTC-TTTAGAGCATGTGCACGCCTGTTTGGACTTCATTTTCATCCACCTGTGCACC  
TATTGTAGTCTTTGGTTGGGTTAGGAGGAAGTGGTCATTGTGTCAGCATCTGCTGGATGT  
GAGGACTTGCATTGTGAAAGCTTTGCTGTCCTTGATGTGATCATGGAATCTCTTTCTCAC  
TAGAGTCTATGTCACCTCATTATACTCTGTCTGAATGTCATTGAATGTCTTTACATGGGCTT  
ATATGCCTATGAAAATTGTAATACAACCTTTTCAGCAACGGATCTCTTGGCTCTCGCATCGA  
TGAAGAACGCAGCGAAATGCGATAAGTAATGTGAATTGCAGAATTCAGTGAATCATCGAA  
TCTTTGAACGCATCTTGCCTCCTTGGTATTCCGAGGAGCATGCCTGTTTGAGTGTCAAT  
AAATTCTCAACTCTCTTCTAC--TTTTTGAAAAGAGAGCTTGGACTGTGGAGGCTTGCT  
GGCCACTTTTTGGGGTCAGCTCCTCTGAAATGCATTAGCGGAACCGTTTGCGATCTGCCA  
CAAGTGTGATAAGTTATCTACACTGGCGAGGGGATTGCTCTCTGTAATGTTTCAGCTTCTA  
ATTGTCTCTACTTTGTGAGACTACTTTTGAATGCTTGACCTCAAATCAGGTAGGACTACC  
CGCTGAACTTAA

>ABC7-5

TTTCCGTAGGTGAACCTGCGGAAGGATCATTATTGAATTATGTTTCTAGATAGGTTGTAG  
CTGGCTC-TTTAGAGCATGTGCACGCCTGTTTGGACTTCATTTTCATCCACCTGTGCACC  
TATTGTAGTCTTTGGTTGGGTTAGGAGGAAGTGGTCATTGTGTCAGCATCTGCTGGATGT  
GAGGACTTGCATTGTGAAAGCTTTGCTGTCCTTGATGTGATCATGGAATCTCTTTCTCAC  
TAGAGTCTATGTCACCTCATTATACTCTGTCTGAATGTCATTGAATGTCTTTACATGGGCTT  
ATATGCCTATGAAAATTGTAATACAACCTTTTCAGCAACGGATCTCTTGGCTCTCGCATCGA  
TGAAGAACGCAGCGAAATGCGATAAGTAATGTGAATTGCAGAATTCAGTGAATCATCGAA  
TCTTTGAACGCATCTTGCCTCCTTGGTATTCCGAGGAGCATGCCTGTTTGAGTGTCAAT  
AAATTCTCAACTCTCTTCTAC--TTTTTGAAAAGAGAGCTTGGACTGTGGAGGCTTGCT  
GGCCACTTTTTGGGGTCAGCTCCTCTGAAATGCATTAGCGGAACCGTTTGCGATCTGCCA  
CAAGTGTGATAAGTTATCTACACTGGCGAGGGGATTGCTCTCTGTAATGTTTCAGCTTCTA  
ATTGTCTCTACTTTGTGAGACTACTTTTGAATGCTTGACCTCAAATCAGGTAGGACTACC  
CGCTGAACTTAA



>ABC8-62

TTTCCGTAGGTGAACCTGCGGAAGGATCATTATTGAATTATGTTTCTAGATAGGTTGTAG  
CTGGCTC-TTTAGAGCATGTGCACGCCTGTTTGGACTTCATTTTCATCCACCTGTGCACC  
TATTGTAGTCTTTGGTTGGGTTAGGAGGAAGTGGTCATTGTGTCAGCATCTGCTGGATGT  
GAGGACTTGCATTGTGAAAGCTTTGCTGTCCTTGATGTGATCATGGAATCTCTTTCTCAC  
TAGAGTCTATGTCACCTCATTATACTCTGTGCGAATGTCATTGAATGTCTTTACATGGGCTT  
ATATGCCTATGAAAATTGTAATACAACCTTTCAGCAACGGATCTCTTGGCTCTCGCATCGA  
TGAAGAACGCAGCGAAATGCGATAAGTAATGTGAATTGCAGAATTCAGTGAATCATCGAA  
TCTTTGAACGCATCTTGCGCTCCTTGGTATTCCGAGGAGCATGCCTGTTTGAGTGTCAAT  
AAATTCTCAACTCTCTTCTAC--TTTTGTAAAAGAGAGCTTGGACTGTGGAGGCTTGCT  
GGCCACTTTTTGGGGTCAGCTCCTCTGAAATGCATTAGCGGAACCGTTTGCGATCTGCCA  
CAAGTGTGATAAGTTATCTACACTGGCGAGGGGATTGCTCTCTGTAATGTTTCAGCTTCTA  
ATTGTCTCTACTTTGTGAGACTACTTTTGAATGCTTGACCTCAAATCAGGTAGGACTACC  
CGCTGAACTTAA

>ABC8-63

TTTCCGTAGGTGAACCTGCGGAAGGATCATTATTGAATTATGTTTCTAGATAGGTTGTAG  
CTGGCTC-TTTAGAGCATGTGCACGCCTGTTTGGACTTCATTTTCATCCACCTGTGCACC  
TATTGTAGTCTTTGGTTGGGTTAGGAGGAAGTGGTCATTGTGTCAGCATCTGCTGGATGT  
GAGGACTTGCATTGTGAAAGCTTTGCTGTCCTTGATGTGATCATGGAATCTCTTTCTCAC  
TAGAGTCTATGTCACCTCATTATACTCTGTGCGAATGTCATTGAATGTCTTTACATGGGCTT  
ATATGCCTATGAAAATTGTAATACAACCTTTCAGCAACGGATCTCTTGGCTCTCGCATCGA  
TGAAGAACGCAGCGAAATGCGATAAGTAATGTGAATTGCAGAATTCAGTGAATCATCGAA  
TCTTTGAACGCATCTTGCGCTCCTTGGTATTCCGAGGAGCATGCCTGTTTGAGTGTCAAT  
AAATTCTCAACTCTCTTCTAC--TTTTGTAAAAGAGAGCTTGGACTGTGGAGGCTTGCT  
GGCCACTTTTTGGGGTCAGCTCCTCTGAAATGCATTAGCGGAACCGTTTGCGATCTGCCA  
CAAGTGTGATAAGTTATCTACACTGGCGAGGGGATTGCTCTCTGTAATGTTTCAGCTTCTA  
ATTGTCTCTACTTTGTGAGACTACTTTTGAATGCTTGACCTCAAATCAGGTAGGACTACC  
CGCTGAACTTAA

>ABC4-13

TTTCCGTAGGTGAACCTGCGGAAGGATCATTATTGAATTATGTTTCTAGATAGGTTGTAG  
CTGGCTC-TTTAGAGCATGTGCACGCCTGTTTGGACTTCATTTTCATCCACCTGTGCACC  
TATTGTAGTCTTTGGTTGGGTTAGGAGGAAGTGGTCATTGTGTCAGCATCTGCTGGATGT  
GAGGACTTGCATTGTGAAAGCTTTGCTGTCCTTGATGTGATCATGGAATCTCTTTCTCAC  
TAGAGTCTATGTCACCTCATTATACTCTGTGCGAATGTCATTGAATGTCTTTACATGGGCTT  
ATATGCCTATGAAAATTGTAATACAACCTTTCAGCAACGGATCTCTTGGCTCTCGCATCGA  
TGAAGAACGCAGCGAAATGCGATAAGTAATGTGAATTGCAGAATTCAGTGAATCATCGAA  
TCTTTGAACGCATCTTGCGCTCCTTGGTATTCCGAGGAGCATGCCTGTTTGAGTGTCAAT  
AAATTCTCAACTCTCTTCTAC--TTTTGTAAAAGAGAGCTTGGACTGTGGAGGCTTGCT  
GGCCACTTTTTGGGGTCAGCTCCTCTGAAATGCATTAGCGGAACCGTTTGCGATCTGCCA  
CAAGTGTGATAAGTTATCTACACTGGCGAGGGGATTGCTCTCTGTAATGTTTCAGCTTCTA  
ATTGTCTCTACTTTGTGAGACTACTTTTGAATGCTTGACCTCAAATCAGGTAGGACTACC  
CGCTGAACTTAA

>ABC4-33

TTTCCGTAGGTGAACCTGCGGAAGGATCATTATTGAATTATGTTTCTAGATAGGTTGTAG  
CTGGCTC-TTTAGAGCATGTGCACGCCTGTTTGGACTTCATTTTCATCCACCTGTGCACC  
TATTGTAGTCTTTGGTTGGGTTAGGAGGAAGTGGTCATTGTGTCAGCATCTGCTGGATGT  
GAGGACTTGCATTGTGAAAGCTTTGCTGTCCTTGATGTGATCATGGAATCTCTTTCTCAC  
TAGAGTCTATGTCACCTCATTATACTCTGTGCGAATGTCATTGAATGTCTTTACATGGGCTT  
ATATGCCTATGAAAATTGTAATACAACCTTTCAGCAACGGATCTCTTGGCTCTCGCATCGA  
TGAAGAACGCAGCGAAATGCGATAAGTAATGTGAATTGCAGAATTCAGTGAATCATCGAA



TCTTTGAACGCATCTTGCGCTCCTTGGTATTCCGAGGAGCATGCCTGTTTGAGTGTCAATT  
AAATTCTCAACTCTCTTCTAC--TTTTTGAAAAGAGAGCTTGGACTGTGGAGGCTTGCT  
GGCCACTTTTTGGGGTCAGCTCCTCTGAAATGCATTAGCGGAACCGTTTGCGATCTGCCA  
CAAGTGTGATAAGTTATCTACACTGGCGAGGGGATTGCTCTCTGTAATGTTGAGCTTCTA  
ATTGTCTCTACTTTGTGAGACTACTTTTGAATGCTTGACCTCAAATCAGGTAGGACTACC  
CGCTGAACTTAA

>ABC8-44

TTTCCGTAGGTGAACCTGCGGAAGGATCATTATTGAATTATGTTTCTAGATAGGTTGTAG  
CTGGCTC-TTTAGAGCATGTGCACGCCTGTTTGGACTTCATTTTCATCCACCTGTGCACC  
TATTGTAGTCTTTGGTTGGGTTAGGAGGAAGTGGTCATTGTGTCAGCATCTGCTGGATGT  
GAGGACTTGCAATTGTGAAAGCTTTGCTGTCTTGATGTGATCATGGAATCTCTTTCTCAC  
TAGAGTCTATGTCACTCATTATACTCTGTGCAATGTCATTGAATGTCTTTACATGGGCTT  
ATATGCCTATGAAAATTGTAATACAACCTTTCAGCAACGGATCTCTTGGCTCTCGCATCGA  
TGAAGAACGCAGCGAAATGCGATAAGTAATGTGAATTGCAGAATTCAGTGAATCATCGAA  
TCTTTGAACGCATCTTGCGCTCCTTGGTATTCCGAGGAGCATGCCTGTTTGAGTGTCAATT  
AAATTCTCAACTCTCTTCTAC--TTTTTGAAAAGAGAGCTTGGACTGTGGAGGCTTGCT  
GGCCACTTTTTGGGGTCAGCTCCTCTGAAATGCATTAGCGGAACCGTTTGCGATCTGCCA  
CAAGTGTGATAAGTTATCTACACTGGCGAGGGGATTGCTCTCTGTAATGTTGAGCTTCTA  
ATTGTCTCTACTTTGTGAGACTACTTTTGAATGCTTGACCTCAAATCAGGTAGGACTACC  
CGCTGAACTTAA

>ABC12-49

TTTCCGTAGGTGAACCTGCGGAAGGATCATTATTGAATTATGTTTCTAGATAGGTTGTAG  
CTGGCTC-TTTAGAGCATGTGCACGCCTGTTTGGACTTCATTTTCATCCACCTGTGCACC  
TATTGTAGTCTTTGGTTGGGTTAGGAGGAAGTGGTCATTGTGTCAGCATCTGCTGGATGT  
GAGGACTTGCAATTGTGAAAGCTTTGCTGTCTTGATGTGATCATGGAATCTCTTTCTCAC  
TAGAGTCTATGTCACTCATTATACTCTGTGCAATGTCATTGAATGTCTTTACATGGGCTT  
ATATGCCTATGAAAATTGTAATACAACCTTTCAGCAACGGATCTCTTGGCTCTCGCATCGA  
TGAAGAACGCAGCGAAATGCGATAAGTAATGTGAATTGCAGAATTCAGTGAATCATCGAA  
TCTTTGAACGCATCTTGCGCTCCTTGGTATTCCGAGGAGCATGCCTGTTTGAGTGTCAATT  
AAATTCTCAACTCTCTTCTAC--TTTTTGAAAAGAGAGCTTGGACTGTGGAGGCTTGCT  
GGCCACTTTTTGGGGTCAGCTCCTCTGAAATGCATTAGCGGAACCGTTTGCGATCTGCCA  
CAAGTGTGATAAGTTATCTACACTGGCGAGGGGATTGCTCTCTGTAATGTTGAGCTTCTA  
ATTGTCTCTACTTTGTGAGACTACTTTTGAATGCTTGACCTCAAATCAGGTAGGACTACC  
CGCTGAACTTAA

>ABC11-17

TTTCCGTAGGTGAACCTGCGGAAGGATCATTATTGAATTATGTTTCTAGATAGGTTGTAG  
CTGGCTC-TTTAGAGCATGTGCACGCCTGTTTGGACTTCATTTTCATCCACCTGTGCACC  
TATTGTAGTCTTTGGTTGGGTTAGGAGGAAGTGGTCATTGTGTCAGCATCTGCTGGATGT  
GAGGACTTGCAATTGTGAAAGCTTTGCTGTCTTGATGTGATCATGGAATCTCTTTCTCAC  
TAGAGTCTATGTCACTCATTATACTCTGTGCAATGTCATTGAATGTCTTTACATGGGCTT  
ATATGCCTATGAAAATTGTAATACAACCTTTCAGCAACGGATCTCTTGGCTCTCGCATCGA  
TGAAGAACGCAGCGAAATGCGATAAGTAATGTGAATTGCAGAATTCAGTGAATCATCGAA  
TCTTTGAACGCATCTTGCGCTCCTTGGTATTCCGAGGAGCATGCCTGTTTGAGTGTCAATT  
AAATTCTCAACTCTCTTCTAC--TTTTTGAAAAGAGAGCTTGGACTGTGGAGGCTTGCT  
GGCCACTTTTTGGGGTCAGCTCCTCTGAAATGCATTAGCGGAACCGTTTGCGATCTGCCA  
CAAGTGTGATAAGTTATCTACACTGGCGAGGGGATTGCTCTCTGTAATGTTGAGCTTCTA  
ATTGTCTCTACTTTGTGAGACTACTTTTGAATGCTTGACCTCAAATCAGGTAGGACTACC  
CGCTGAACTTAA

>ABC3-68

TTTCCGTAGGTGAACCTGCGGAAGGATCATTATTGAATTATGTTTCTAGATAGGTTGTAG



CTGGCTC-TTTAGAGCATGTGCACGCCTGTTTGGACTTCATTTTCATCCACCTGTGCACC  
TATTGTAGTCTTTGGTTGGGTTAGGAGGAAGTGGTCATTGTGTCAGCATCTGCTGGATGT  
GAGGACTTGCATTGTGAAAGCTTTGCTGTCCTTGATGTGATCATGGAATCTCTTTCTCAC  
TAGAGTCTATGTCACCTATTATACTCTGTGCAATGTCATTGAATGTCTTTACATGGGCTT  
ATATGCCTATGAAAATTGTAATACAACCTTTCAGCAACGGATCTCTTGGCTCTCGCATCGA  
TGAAGAACGCAGCGAAATGCGATAAGTAATGTGAATTGCAGAATTCAGTGAATCATCGAA  
TCTTTGAACGCATCTTGCCTCCTTGGTATTCCGAGGAGCATGCCTGTTTGAGTGTCAAT  
AAATTCTCAACTCTCTTCTAC--TTTTTGTAAGAGAGCTTGGACTGTGGAGGCTTGCT  
GGCCACTTTTTGGGGTCAGCTCCTCTGAAATGCATTAGCGGAACCGTTTGCGATCTGCCA  
CAAGTGTGATAAGTTATCTACACTGGCGAGGGGATTGCTCTCTGTAATGTTGAGCTTCTA  
ATTGTCTCTACTTTGTGAGACTACTTTTGAATGCTTGACCTCAAATCAGGTAGGACTACC  
CGCTGAACTTAA

>ABC3-30

TTTCCGTAGGTGAACCTGCGGAAGGATCATTATTGAATTATGTTTCTAGATAGGTTGTAG  
CTGGCTC-TTTAGAGCATGTGCACGCCTGTTTGGACTTCATTTTCATCCACCTGTGCACC  
TATTGTAGTCTTTGGTTGGGTTAGGAGGAAGTGGTCATTGTGTCAGCATCTGCTGGATGT  
GAGGACTTGCATTGTGAAAGCTTTGCTGTCCTTGATGTGATCATGGAATCTCTTTCTCAC  
TAGAGTCTATGTCACCTATTATACTCTGTGCAATGTCATTGAATGTCTTTACATGGGCTT  
ATATGCCTATGAAAATTGTAATACAACCTTTCAGCAACGGATCTCTTGGCTCTCGCATCGA  
TGAAGAACGCAGCGAAATGCGATAAGTAATGTGAATTGCAGAATTCAGTGAATCATCGAA  
TCTTTGAACGCATCTTGCCTCCTTGGTATTCCGAGGAGCATGCCTGTTTGAGTGTCAAT  
AAATTCTCAACTCTCTTCTAC--TTTTTGTAAGAGAGCTTGGACTGTGGAGGCTTGCT  
GGCCACTTTTTGGGGTCAGCTCCTCTGAAATGCATTAGCGGAACCGTTTGCGATCTGCCA  
CAAGTGTGATAAGTTATCTACACTGGCGAGGGGATTGCTCTCTGTAATGTTGAGCTTCTA  
ATTGTCTCTACTTTGTGAGACTACTTTTGAATGCTTGACCTCAAATCAGGTAGGACTACC  
CGCTGAACTTAA

>ABC11-14

TTTCCGTAGGTGAACCTGCGGAAGGATCATTATTGAATTATGTTTCTAGATAGGTTGTAG  
CTGGCTC-TTTAGAGCATGTGCACGCCTGTTTGGACTTCATTTTCATCCACCTGTGCACC  
TATTGTAGTCTTTGGTTGGGTTAGGAGGAAGTGGTCATTGTGTCAGCATCTGCTGGATGT  
GAGGACTTGCATTGTGAAAGCTTTGCTGTCCTTGATGTGATCATGGAATCTCTTTCTCAC  
TAGAGTCTATGTCACCTATTATACTCTGTGCAATGTCATTGAATGTCTTTACATGGGCTT  
ATATGCCTATGAAAATTGTAATACAACCTTTCAGCAACGGATCTCTTGGCTCTCGCATCGA  
TGAAGAACGCAGCGAAATGCGATAAGTAATGTGAATTGCAGAATTCAGTGAATCATCGAA  
TCTTTGAACGCATCTTGCCTCCTTGGTATTCCGAGGAGCATGCCTGTTTGAGTGTCAAT  
AAATTCTCAACTCTCTTCTAC--TTTTTGTAAGAGAGCTTGGACTGTGGAGGCTTGCT  
GGCCACTTTTTGGGGTCAGCTCCTCTGAAATGCATTAGCGGAACCGTTTGCGATCTGCCA  
CAAGTGTGATAAGTTATCTACACTGGCGAGGGGATTGCTCTCTGTAATGTTGAGCTTCTA  
ATTGTCTCTACTTTGTGAGACTACTTTTGAATGCTTGACCTCAAATCAGGTAGGACTACC  
CGCTGAACTTAA

>ABC10-29

TTTCCGTAGGTGAACCTGCGGAAGGATCATTATTGAATTATGTTTCTAGATAGGTTGTAG  
CTGGCTC-TTTAGAGCATGTGCACGCCTGTTTGGACTTCATTTTCATCCACCTGTGCACC  
TATTGTAGTCTTTGGTTGGGTTAGGAGGAAGTGGTCATTGTGTCAGCATCTGCTGGATGT  
GAGGACTTGCATTGTGAAAGCTTTGCTGTCCTTGATGTGATCATGGAATCTCTTTCTCAC  
TAGAGTCTATGTCACCTATTATACTCTGTGCAATGTCATTGAATGTCTTTACATGGGCTT  
ATATGCCTATGAAAATTGTAATACAACCTTTCAGCAACGGATCTCTTGGCTCTCGCATCGA  
TGAAGAACGCAGCGAAATGCGATAAGTAATGTGAATTGCAGAATTCAGTGAATCATCGAA  
TCTTTGAACGCATCTTGCCTCCTTGGTATTCCGAGGAGCATGCCTGTTTGAGTGTCAAT  
AAATTCTCAACTCTCTTCTAC--TTTTTGTAAGAGAGCTTGGACTGTGGAGGCTTGCT



GGCCACTTTTTGGGGTCAGCTCCTCTGAAATGCATTAGCGGAACCGTTTGCGATCTGCCA  
CAAGTGTGATAAGTTATCTACACTGGCGAGGGGATTGCTCTCTGTAATGTTGAGCTTCTA  
ATTGTCTCTACTTTGTGAGACTACTTTTGAATGCTTGACCTCAAATCAGGTAGGACTACC  
CGCTGAACTTAA

>ABC4-72

TTTCCGTAGGTGAACCTGCGGAAGGATCATTATTGAATTATGTTTCTAGATAGGTTGTAG  
CTGGCTC-TTTAGAGCATGTGCACGCCTGTTTGGACTTCATTTTCATCCACCTGTGCACC  
TATTGTAGTCTTTGGTTGGGTTAGGAGGAAGTGGTCATTGTGTCAGCATCTGCTGGATGT  
GAGGACTTGCATTGTGAAAGCTTTGCTGTCCTTGATGTGATCATGGAATCTCTTTCTCAC  
TAGAGTCTATGTCACTCATTATACTCTGTGCAATGTCATTGAATGTCTTTACATGGGCTT  
ATATGCCTATGAAAATTGTAATAACAACCTTTAGCAACGGATCTCTTGGCTCTCGCATCGA  
TGAAGAACGCAGCGAAATGCGATAAGTAATGTGAATTGCAGAATTCAGTGAATCATCGAA  
TCTTTGAACGCATCTTGCGCTCCTTGGTATTCCGAGGAGCATGCCTGTTTGAGTGTGATT  
AAATTCTCAACTCTCTTCTAC--TTTTTGTAAGAGAGCTTGGACTGTGGAGGCTTGCT  
GGCCACTTTTTGGGGTCAGCTCCTCTGAAATGCATTAGCGGAACCGTTTGCGATCTGCCA  
CAAGTGTGATAAGTTATCTACACTGGCGAGGGGATTGCTCTCTGTAATGTTGAGCTTCTA  
ATTGTCTCTACTTTGTGAGACTACTTTTGAATGCTTGACCTCAAATCAGGTAGGACTACC  
CGCTGAACTTAA

>ABC6-57

TTTCCGTAGGTGAACCTGCGGAAGGATCATTATTGAATTATGTTTCTAGATAGGTTGTAG  
CTGGCTC-TTTAGAGCATGTGCACGCCTGTTTGGACTTCATTTTCATCCACCTGTGCACC  
TATTGTAGTCTTTGGTTGGGTTAGGAGGAAGTGGTCATTGTGTCAGCATCTGCTGGATGT  
GAGGACTTGCATTGTGAAAGCTTTGCTGTCCTTGATGTGATCATGGAATCTCTTTCTCAC  
TAGAGTCTATGTCACTCATTATACTCTGTGCAATGTCATTGAATGTCTTTACATGGGCTT  
ATATGCCTATGAAAATTGTAATAACAACCTTTAGCAACGGATCTCTTGGCTCTCGCATCGA  
TGAAGAACGCAGCGAAATGCGATAAGTAATGTGAATTGCAGAATTCAGTGAATCATCGAA  
TCTTTGAACGCATCTTGCGCTCCTTGGTATTCCGAGGAGCATGCCTGTTTGAGTGTGATT  
AAATTCTCAACTCTCTTCTAC--TTTTTGTAAGAGAGCTTGGACTGTGGAGGCTTGCT  
GGCCACTTTTTGGGGTCAGCTCCTCTGAAATGCATTAGCGGAACCGTTTGCGATCTGCCA  
CAAGTGTGATAAGTTATCTACACTGGCGAGGGGATTGCTCTCTGTAATGTTGAGCTTCTA  
ATTGTCTCTACTTTGTGAGACTACTTTTGAATGCTTGACCTCAAATCAGGTAGGACTACC  
CGCTGAACTTAA

>ABC3-41

TTTCCGTAGGTGAACCTGCGGAAGGATCATTATTGAATTATGTTTCTAGATAGGTTGTAG  
CTGGCTC-TTTAGAGCATGTGCACGCCTGTTTGGACTTCATTTTCATCCACCTGTGCACC  
TATTGTAGTCTTTGGTTGGGTTAGGAGGAAGTGGTCATTGTGTCAGCATCTGCTGGATGT  
GAGGACTTGCATTGTGAAAGCTTTGCTGTCCTTGATGTGATCATGGAATCTCTTTCTCAC  
TAGAGTCTATGTCACTCATTATACTCTGTGCAATGTCATTGAATGTCTTTACATGGGCTT  
ATATGCCTATGAAAATTGTAATAACAACCTTTAGCAACGGATCTCTTGGCTCTCGCATCGA  
TGAAGAACGCAGCGAAATGCGATAAGTAATGTGAATTGCAGAATTCAGTGAATCATCGAA  
TCTTTGAACGCATCTTGCGCTCCTTGGTATTCCGAGGAGCATGCCTGTTTGAGTGTGATT  
AAATTCTCAACTCTCTTCTAC--TTTTTGTAAGAGAGCTTGGACTGTGGAGGCTTGCT  
GGCCACTTTTTGGGGTCAGCTCCTCTGAAATGCATTAGCGGAACCGTTTGCGATCTGCCA  
CAAGTGTGATAAGTTATCTACACTGGCGAGGGGATTGCTCTCTGTAATGTTGAGCTTCTA  
ATTGTCTCTACTTTGTGAGACTACTTTTGAATGCTTGACCTCAAATCAGGTAGGACTACC  
CGCTGAACTTAA

>ABC9-30

TTTCCGTAGGTGAACCTGCGGAAGGATCATTATTGAATTATGTTTCTAGATAGGTTGTAG  
CTGGCTC-TTTAGAGCATGTGCACGCCTGTTTGGACTTCATTTTCATCCACCTGTGCACC  
TATTGTAGTCTTTGGTTGGGTTAGGAGGAAGTGGTCATTGTGTCAGCATCTGCTGGATGT



GAGGACTTGCATTGTGAAAGCTTTGCTGTCCTTGATGTGATCATGGAATCTCTTTCTCAC  
TAGAGTCTATGTCACCTATTATACTCTGTGCAATGTCATTGAATGTCTTTACATGGGCTT  
ATATGCCTATGAAAATTGTAATACAACCTTTAGCAACGGATCTCTTGGCTCTCGCATCGA  
TGAAGAACGCAGCGAAATGCGATAAGTAATGTGAATTGCAGAATTCAGTGAATCATCGAA  
TCTTTGAACGCATCTTGCGCTCCTTGGTATTCCGAGGAGCATGCCTGTTTGAGTGTGATT  
AAATTCTCAACTCTCTTCTAC--TTTTTGAAAAGAGAGCTTGGACTGTGGAGGCTTGCT  
GGCCACTTTTTGGGGTCAGCTCCTCTGAAATGCATTAGCGGAACCGTTTGCGATCTGCCA  
CAAGTGTGATAAGTTATCTACACTGGCGAGGGGATTGCTCTCTGTAATGTTGAGCTTCTA  
ATTGTCTCTACTTTGTGAGACTACTTTTGAATGCTTGACCTCAAATCAGGTAGGACTACC  
CGCTGAACTTAA

>ABC11-47

TTTCCGTAGGTGAACCTGCGGAAGGATCATTATTGAATTATGTTTCTAGATAGGTTGTAG  
CTGGCTC-TTLAGAGCATGTGCACGCCTGTTTGGACTTCATTTTCATCCACCTGTGCACC  
TATTGTAGTCTTTGGTTGGGTTAGGAGGAAGTGGTCATTGTGTCAGCATCTGCTGGATGT  
GAGGACTTGCATTGTGAAAGCTTTGCTGTCCTTGATGTGATCATGGAATCTCTTTCTCAC  
TAGAGTCTATGTCACCTATTATACTCTGTGCAATGTCATTGAATGTCTTTACATGGGCTT  
ATATGCCTATGAAAATTGTAATACAACCTTTAGCAACGGATCTCTTGGCTCTCGCATCGA  
TGAAGAACGCAGCGAAATGCGATAAGTAATGTGAATTGCAGAATTCAGTGAATCATCGAA  
TCTTTGAACGCATCTTGCGCTCCTTGGTATTCCGAGGAGCATGCCTGTTTGAGTGTGATT  
AAATTCTCAACTCTCTTCTAC--TTTTTGAAAAGAGAGCTTGGACTGTGGAGGCTTGCT  
GGCCACTTTTTGGGGTCAGCTCCTCTGAAATGCATTAGCGGAACCGTTTGCGATCTGCCA  
CAAGTGTGATAAGTTATCTACACTGGCGAGGGGATTGCTCTCTGTAATGTTGAGCTTCTA  
ATTGTCTCTACTTTGTGAGACTACTTTTGAATGCTTGACCTCAAATCAGGTAGGACTACC  
CGCTGAACTTAA

>ABC1-38

TTTCCGTAGGTGAACCTGCGGAAGGATCATTATTGAATTATGTTTCTAGATAGGTTGTAG  
CTGGCTC-TTLAGAGCATGTGCACGCCTGTTTGGACTTCATTTTCATCCACCTGTGCACC  
TATTGTAGTCTTTGGTTGGGTTAGGAGGAAGTGGTCATTGTGTCAGCATCTGCTGGATGT  
GAGGACTTGCATTGTGAAAGCTTTGCTGTCCTTGATGTGATCATGGAATCTCTTTCTCAC  
TAGAGTCTATGTCACCTATTATACTCTGTGCAATGTCATTGAATGTCTTTACATGGGCTT  
ATATGCCTATGAAAATTGTAATACAACCTTTAGCAACGGATCTCTTGGCTCTCGCATCGA  
TGAAGAACGCAGCGAAATGCGATAAGTAATGTGAATTGCAGAATTCAGTGAATCATCGAA  
TCTTTGAACGCATCTTGCGCTCCTTGGTATTCCGAGGAGCATGCCTGTTTGAGTGTGATT  
AAATTCTCAACTCTCTTCTAC--TTTTTGAAAAGAGAGCTTGGACTGTGGAGGCTTGCT  
GGCCACTTTTTGGGGTCAGCTCCTCTGAAATGCATTAGCGGAACCGTTTGCGATCTGCCA  
CAAGTGTGATAAGTTATCTACACTGGCGAGGGGATTGCTCTCTGTAATGTTGAGCTTCTA  
ATTGTCTCTACTTTGTGAGACTACTTTTGAATGCTTGACCTCAAATCAGGTAGGACTACC  
CGCTGAACTTAA

>ABC11-13

TTTCCGTAGGTGAACCTGCGGAAGGATCATTATTGAATTATGTTTCTAGATAGGTTGTAG  
CTGGCTC-TTLAGAGCATGTGCACGCCTGTTTGGACTTCATTTTCATCCACCTGTGCACC  
TATTGTAGTCTTTGGTTGGGTTAGGAGGAAGTGGTCATTGTGTCAGCATCTGCTGGATGT  
GAGGACTTGCATTGTGAAAGCTTTGCTGTCCTTGATGTGATCATGGAATCTCTTTCTCAC  
TAGAGTCTATGTCACCTATTATACTCTGTGCAATGTCATTGAATGTCTTTACATGGGCTT  
ATATGCCTATGAAAATTGTAATACAACCTTTAGCAACGGATCTCTTGGCTCTCGCATCGA  
TGAAGAACGCAGCGAAATGCGATAAGTAATGTGAATTGCAGAATTCAGTGAATCATCGAA  
TCTTTGAACGCATCTTGCGCTCCTTGGTATTCCGAGGAGCATGCCTGTTTGAGTGTGATT  
AAATTCTCAACTCTCTTCTAC--TTTTTGAAAAGAGAGCTTGGACTGTGGAGGCTTGCT  
GGCCACTTTTTGGGGTCAGCTCCTCTGAAATGCATTAGCGGAACCGTTTGCGATCTGCCA  
CAAGTGTGATAAGTTATCTACACTGGCGAGGGGATTGCTCTCTGTAATGTTGAGCTTCTA



ATTGTCTCTACTTTGTGAGACTACTTTTGAATGCTTGACCTCAAATCAGGTAGGACTACC  
CGCTGAACTTAA

>ABC11-44

TTTCCGTAGGTGAACCTGCGGAAGGATCATTATTGAATTATGTTTCTAGATAGGTTGTAG  
CTGGCTC-TTTAGAGCATGTGCACGCCTGTTTGGACTTCATTTTCATCCACCTGTGCACC  
TATTGTAGTCTTTGGTTGGGTTAGGAGGAAGTGGTCATTGTGTCAGCATCTGCTGGATGT  
GAGGACTTGCATTGTGAAAGCTTTGCTGTCCTTGATGTGATCATGGAATCTCTTTCTCAC  
TAGAGTCTATGTCACTCATTATACTCTGTGCAATGTCATTGAATGTCTTTACATGGGCTT  
ATATGCCTATGAAAATTGTAATAACAACCTTTCAGCAACGGATCTCTTGGCTCTCGCATCGA  
TGAAGAACGCAGCGAAATGCGATAAGTAATGTGAATTGCAGAATTCAGTGAATCATCGAA  
TCTTTGAACGCATCTTGCCTCCTTGGTATTCCGAGGAGCATGCCTGTTTGAGTGTCAAT  
AAATTCTCAACTCTCTTCTAC--TTTTGTAAAAGAGAGCTTGGACTGTGGAGGCTTGCT  
GGCCACTTTTTGGGGTCAGCTCCTCTGAAATGCATTAGCGGAACCGTTTGCGATCTGCCA  
CAAGTGTGATAAGTTATCTACACTGGCGAGGGGATTGCTCTCTGTAATGTTTCAGCTTCTA  
ATTGTCTCTACTTTGTGAGACTACTTTTGAATGCTTGACCTCAAATCAGGTAGGACTACC  
CGCTGAACTTAA

>ABC10-6

TTTCCGTAGGTGAACCTGCGGAAGGATCATTATTGAATTATGTTTCTAGATAGGTTGTAG  
CTGGCTC-TTTAGAGCATGTGCACGCCTGTTTGGACTTCATTTTCATCCACCTGTGCACC  
TATTGTAGTCTTTGGTTGGGTTAGGAGGAAGTGGTCATTGTGTCAGCATCTGCTGGATGT  
GAGGACTTGCATTGTGAAAGCTTTGCTGTCCTTGATGTGATCATGGAATCTCTTTCTCAC  
TAGAGTCTATGTCACTCATTATACTCTGTGCAATGTCATTGAATGTCTTTACATGGGCTT  
ATATGCCTATGAAAATTGTAATAACAACCTTTCAGCAACGGATCTCTTGGCTCTCGCATCGA  
TGAAGAACGCAGCGAAATGCGATAAGTAATGTGAATTGCAGAATTCAGTGAATCATCGAA  
TCTTTGAACGCATCTTGCCTCCTTGGTATTCCGAGGAGCATGCCTGTTTGAGTGTCAAT  
AAATTCTCAACTCTCTTCTAC--TTTTGTAAAAGAGAGCTTGGACTGTGGAGGCTTGCT  
GGCCACTTTTTGGGGTCAGCTCCTCTGAAATGCATTAGCGGAACCGTTTGCGATCTGCCA  
CAAGTGTGATAAGTTATCTACACTGGCGAGGGGATTGCTCTCTGTAATGTTTCAGCTTCTA  
ATTGTCTCTACTTTGTGAGACTACTTTTGAATGCTTGACCTCAAATCAGGTAGGACTACC  
CGCTGAACTTAA

>ABC4-18

TTTCCGTAGGTGAACCTGCGGAAGGATCATTATTGAATTATGTTTCTAGATAGGTTGTAG  
CTGGCTC-TTTAGAGCATGTGCACGCCTGTTTGGACTTCATTTTCATCCACCTGTGCACC  
TATTGTAGTCTTTGGTTGGGTTAGGAGGAAGTGGTCATTGTGTCAGCATCTGCTGGATGT  
GAGGACTTGCATTGTGAAAGCTTTGCTGTCCTTGATGTGATCATGGAATCTCTTTCTCAC  
TAGAGTCTATGTCACTCATTATACTCTGTGCAATGTCATTGAATGTCTTTACATGGGCTT  
ATATGCCTATGAAAATTGTAATAACAACCTTTCAGCAACGGATCTCTTGGCTCTCGCATCGA  
TGAAGAACGCAGCGAAATGCGATAAGTAATGTGAATTGCAGAATTCAGTGAATCATCGAA  
TCTTTGAACGCATCTTGCCTCCTTGGTATTCCGAGGAGCATGCCTGTTTGAGTGTCAAT  
AAATTCTCAACTCTCTTCTAC--TTTTGTAAAAGAGAGCTTGGACTGTGGAGGCTTGCT  
GGCCACTTTTTGGGGTCAGCTCCTCTGAAATGCATTAGCGGAACCGTTTGCGATCTGCCA  
CAAGTGTGATAAGTTATCTACACTGGCGAGGGGATTGCTCTCTGTAATGTTTCAGCTTCTA  
ATTGTCTCTACTTTGTGAGACTACTTTTGAATGCTTGACCTCAAATCAGGTAGGACTACC  
CGCTGAACTTAA

>ABC5-40

TTTCCGTAGGTGAACCTGCGGAAGGATCATTATTGAATTATGTTTCTAGATAGGTTGTAG  
CTGGCTC-TTTAGAGCATGTGCACGCCTGTTTGGACTTCATTTTCATCCACCTGTGCACC  
TATTGTAGTCTTTGGTTGGGTTAGGAGGAAGTGGTCATTGTGTCAGCATCTGCTGGATGT  
GAGGACTTGCATTGTGAAAGCTTTGCTGTCCTTGATGTGATCATGGAATCTCTTTCTCAC  
TAGAGTCTATGTCACTCATTATACTCTGTGCAATGTCATTGAATGTCTTTACATGGGCTT



ATATGCCTATGAAAATTGTAATACAACCTTTTCAGCAACGGATCTCTTGGCTCTCGCATCGA  
TGAAGAACGCAGCGAAATGCGATAAGTAATGTGAATTGCAGAATTCAGTGAATCATCGAA  
TCTTTGAACGCATCTTGCCTCCTTGGTATTCCGAGGAGCATGCCTGTTTGAGTGTCAAT  
AAATTCTCAACTCTCTTCTAC--TTTTTGAAAAGAGAGCTTGGACTGTGGAGGCTTGCT  
GGCCACTTTTTGGGGTCAGCTCCTCTGAAATGCATTAGCGGAACCGTTTGCGATCTGCCA  
CAAGTGTGATAAGTTATCTACACTGGCGAGGGGATTGCTCTCTGTAATGTTTCAGCTTCTA  
ATTGTCTCTACTTTGTGAGACTACTTTTGAATGCTTGACCTCAAATCAGGTAGGACTACC  
CGCTGAACTTAA

>ABC4-70

TTTCCGTAGGTGAACCTGCGGAAGGATCATTATTGAATTATGTTTCTAGATAGGTTGTAG  
CTGGCTC-TTLAGAGCATGTGCACGCCTGTTTGGACTTCATTTTCATCCACCTGTGCACC  
TATTGTAGTCTTTGGTTGGGTTAGGAGGAAGTGGTCATTGTGTCAGCATCTGCTGGATGT  
GAGGACTTGCATTGTGAAAGCTTTGCTGTCCTTGATGTGATCATGGAATCTCTTTCTCAC  
TAGAGTCTATGTCACCTCATTATACTCTGTCTGAATGTCATTGAATGTCTTTACATGGGCTT  
ATATGCCTATGAAAATTGTAATACAACCTTTTCAGCAACGGATCTCTTGGCTCTCGCATCGA  
TGAAGAACGCAGCGAAATGCGATAAGTAATGTGAATTGCAGAATTCAGTGAATCATCGAA  
TCTTTGAACGCATCTTGCCTCCTTGGTATTCCGAGGAGCATGCCTGTTTGAGTGTCAAT  
AAATTCTCAACTCTCTTCTAC--TTTTTGAAAAGAGAGCTTGGACTGTGGAGGCTTGCT  
GGCCACTTTTTGGGGTCAGCTCCTCTGAAATGCATTAGCGGAACCGTTTGCGATCTGCCA  
CAAGTGTGATAAGTTATCTACACTGGCGAGGGGATTGCTCTCTGTAATGTTTCAGCTTCTA  
ATTGTCTCTACTTTGTGAGACTACTTTTGAATGCTTGACCTCAAATCAGGTAGGACTACC  
CGCTGAACTTAA

>ABC8-15

TTTCCGTAGGTGAACCTGCGGAAGGATCATTATTGAATTATGTTTCTAGATAGGTTGTAG  
CTGGCTC-TTLAGAGCATGTGCACGCCTGTTTGGACTTCATTTTCATCCACCTGTGCACC  
TATTGTAGTCTTTGGTTGGGTTAGGAGGAAGTGGTCATTGTGTCAGCATCTGCTGGATGT  
GAGGACTTGCATTGTGAAAGCTTTGCTGTCCTTGATGTGATCATGGAATCTCTTTCTCAC  
TAGAGTCTATGTCACCTCATTATACTCTGTCTGAATGTCATTGAATGTCTTTACATGGGCTT  
ATATGCCTATGAAAATTGTAATACAACCTTTTCAGCAACGGATCTCTTGGCTCTCGCATCGA  
TGAAGAACGCAGCGAAATGCGATAAGTAATGTGAATTGCAGAATTCAGTGAATCATCGAA  
TCTTTGAACGCATCTTGCCTCCTTGGTATTCCGAGGAGCATGCCTGTTTGAGTGTCAAT  
AAATTCTCAACTCTCTTCTAC--TTTTTGAAAAGAGAGCTTGGACTGTGGAGGCTTGCT  
GGCCACTTTTTGGGGTCAGCTCCTCTGAAATGCATTAGCGGAACCGTTTGCGATCTGCCA  
CAAGTGTGATAAGTTATCTACACTGGCGAGGGGATTGCTCTCTGTAATGTTTCAGCTTCTA  
ATTGTCTCTACTTTGTGAGACTACTTTTGAATGCTTGACCTCAAATCAGGTAGGACTACC  
CGCTGAACTTAA

>ABC8-31

TTTCCGTAGGTGAACCTGCGGAAGGATCATTATTGAATTATGTTTCTAGATAGGTTGTAG  
CTGGCTC-TTLAGAGCATGTGCACGCCTGTTTGGACTTCATTTTCATCCACCTGTGCACC  
TATTGTAGTCTTTGGTTGGGTTAGGAGGAAGTGGTCATTGTGTCAGCATCTGCTGGATGT  
GAGGACTTGCATTGTGAAAGCTTTGCTGTCCTTGATGTGATCATGGAATCTCTTTCTCAC  
TAGAGTCTATGTCACCTCATTATACTCTGTCTGAATGTCATTGAATGTCTTTACATGGGCTT  
ATATGCCTATGAAAATTGTAATACAACCTTTTCAGCAACGGATCTCTTGGCTCTCGCATCGA  
TGAAGAACGCAGCGAAATGCGATAAGTAATGTGAATTGCAGAATTCAGTGAATCATCGAA  
TCTTTGAACGCATCTTGCCTCCTTGGTATTCCGAGGAGCATGCCTGTTTGAGTGTCAAT  
AAATTCTCAACTCTCTTCTAC--TTTTTGAAAAGAGAGCTTGGACTGTGGAGGCTTGCT  
GGCCACTTTTTGGGGTCAGCTCCTCTGAAATGCATTAGCGGAACCGTTTGCGATCTGCCA  
CAAGTGTGATAAGTTATCTACACTGGCGAGGGGATTGCTCTCTGTAATGTTTCAGCTTCTA  
ATTGTCTCTACTTTGTGAGACTACTTTTGAATGCTTGACCTCAAATCAGGTAGGACTACC  
CGCTGAACTTAA



>ABC9-27

TTTCCGTAGGTGAACCTGCGGAAGGATCATTATTGAATTATGTTTCTAGATAGGTTGTAG  
CTGGCTC-TTTAGAGCATGTGCACGCCTGTTTGGACTTCATTTTCATCCACCTGTGCACC  
TATTGTAGTCTTTGGTTGGGTTAGGAGGAAGTGGTCATTGTGTCAGCATCTGCTGGATGT  
GAGGACTTGCATTGTGAAAGCTTTGCTGTCCTTGATGTGATCATGGAATCTCTTTCTCAC  
TAGAGTCTATGTCACCTCATTATACTCTGTCTGAATGTCATTGAATGTCTTTACATGGGCTT  
ATATGCCTATGAAAATTGTAATACAACCTTTCAGCAACGGATCTCTTGGCTCTCGCATCGA  
TGAAGAACGCAGCGAAATGCGATAAGTAATGTGAATTGCAGAATTCAGTGAATCATCGAA  
TCTTTGAACGCATCTTGCCTCCTTGGTATTCCGAGGAGCATGCCTGTTTGAGTGTCTATT  
AAATTCTCAACTCTCTTCTAC--TTTTGTAAAAGAGAGCTTGGACTGTGGAGGCTTGCT  
GGCCACTTTTTGGGGTCAGCTCCTCTGAAATGCATTAGCGGAACCGTTTGCGATCTGCCA  
CAAGTGTGATAAGTTATCTACACTGGCGAGGGGATTGCTCTCTGTAATGTTTCAGCTTCTA  
ATTGTCTCTACTTTGTGAGACTACTTTTGAATGCTTGACCTCAAATCAGGTAGGACTACC  
CGCTGAACTTAA

>ABC11-51

TTTCCGTAGGTGAACCTGCGGAAGGATCATTATTGAATTATGTTTCTAGATAGGTTGTAG  
CTGGCTC-TTTAGAGCATGTGCACGCCTGTTTGGACTTCATTTTCATCCACCTGTGCACC  
TATTGTAGTCTTTGGTTGGGTTAGGAGGAAGTGGTCATTGTGTCAGCATCTGCTGGATGT  
GAGGACTTGCATTGTGAAAGCTTTGCTGTCCTTGATGTGATCATGGAATCTCTTTCTCAC  
TAGAGTCTATGTCACCTCATTATACTCTGTCTGAATGTCATTGAATGTCTTTACATGGGCTT  
ATATGCCTATGAAAATTGTAATACAACCTTTCAGCAACGGATCTCTTGGCTCTCGCATCGA  
TGAAGAACGCAGCGAAATGCGATAAGTAATGTGAATTGCAGAATTCAGTGAATCATCGAA  
TCTTTGAACGCATCTTGCCTCCTTGGTATTCCGAGGAGCATGCCTGTTTGAGTGTCTATT  
AAATTCTCAACTCTCTTCTAC--TTTTGTAAAAGAGAGCTTGGACTGTGGAGGCTTGCT  
GGCCACTTTTTGGGGTCAGCTCCTCTGAAATGCATTAGCGGAACCGTTTGCGATCTGCCA  
CAAGTGTGATAAGTTATCTACACTGGCGAGGGGATTGCTCTCTGTAATGTTTCAGCTTCTA  
ATTGTCTCTACTTTGTGAGACTACTTTTGAATGCTTGACCTCAAATCAGGTAGGACTACC  
CGCTGAACTTAA

>ABC12-20

TTTCCGTAGGTGAACCTGCGGAAGGATCATTATTGAATTATGTTTCTAGATAGGTTGTAG  
CTGGCTC-TTTAGAGCATGTGCACGCCTGTTTGGACTTCATTTTCATCCACCTGTGCACC  
TATTGTAGTCTTTGGTTGGGTTAGGAGGAAGTGGTCATTGTGTCAGCATCTGCTGGATGT  
GAGGACTTGCATTGTGAAAGCTTTGCTGTCCTTGATGTGATCATGGAATCTCTTTCTCAC  
TAGAGTCTATGTCACCTCATTATACTCTGTCTGAATGTCATTGAATGTCTTTACATGGGCTT  
ATATGCCTATGAAAATTGTAATACAACCTTTCAGCAACGGATCTCTTGGCTCTCGCATCGA  
TGAAGAACGCAGCGAAATGCGATAAGTAATGTGAATTGCAGAATTCAGTGAATCATCGAA  
TCTTTGAACGCATCTTGCCTCCTTGGTATTCCGAGGAGCATGCCTGTTTGAGTGTCTATT  
AAATTCTCAACTCTCTTCTAC--TTTTGTAAAAGAGAGCTTGGACTGTGGAGGCTTGCT  
GGCCACTTTTTGGGGTCAGCTCCTCTGAAATGCATTAGCGGAACCGTTTGCGATCTGCCA  
CAAGTGTGATAAGTTATCTACACTGGCGAGGGGATTGCTCTCTGTAATGTTTCAGCTTCTA  
ATTGTCTCTACTTTGTGAGACTACTTTTGAATGCTTGACCTCAAATCAGGTAGGACTACC  
CGCTGAACTTAA

>ABC1-31

TTTCCGTAGGTGAACCTGCGGAAGGATCATTATTGAATTATGTTTCTAGATAGGTTGTAG  
CTGGCTC-TTTAGAGCATGTGCACGCCTGTTTGGACTTCATTTTCATCCACCTGTGCACC  
TATTGTAGTCTTTGGTTGGGTTAGGAGGAAGTGGTCATTGTGTCAGCATCTGCTGGATGT  
GAGGACTTGCATTGTGAAAGCTTTGCTGTCCTTGATGTGATCATGGAATCTCTTTCTCAC  
TAGAGTCTATGTCACCTCATTATACTCTGTCTGAATGTCATTGAATGTCTTTACATGGGCTT  
ATATGCCTATGAAAATTGTAATACAACCTTTCAGCAACGGATCTCTTGGCTCTCGCATCGA  
TGAAGAACGCAGCGAAATGCGATAAGTAATGTGAATTGCAGAATTCAGTGAATCATCGAA



TCTTTGAACGCATCTTGCGCTCCTTGGTATTCCGAGGAGCATGCCTGTTTGAGTGTCAATT  
AAATTCTCAACTCTCTTCTAC--TTTTGTAAAAGAGAGCTTGGACTGTGGAGGCTTGCT  
GGCCACTTTTTGGGGTCAGCTCCTCTGAAATGCATTAGCGGAACCGTTTGCGATCTGCCA  
CAAGTGTGATAAGTTATCTACACTGGCGAGGGGATTGCTCTCTGTAATGTTTCAGCTTCTA  
ATTGTCTCTACTTTGTGAGACTACTTTTGAATGCTTGACCTCAAATCAGGTAGGACTACC  
CGCTGAACTTAA

>ABC1-56

TTTCCGTAGGTGAACCTGCGGAAGGATCATTATTGAATTATGTTTCTAGATAGGTTGTAG  
CTGGCTC-TTTAGAGCATGTGCACGCCTGTTTGGACTTCATTTTCATCCACCTGTGCACC  
TATTGTAGTCTTTGGTTGGGTTAGGAGGAAGTGGTCATTGTGTCAGCATCTGCTGGATGT  
GAGGACTTGCAATTGTGAAAGCTTTGCTGTCCTTGATGTGATCATGGAATCTCTTTCTCAC  
TAGAGTCTATGTCACCTCATTATACTCTGTGCAATGTCATTGAATGTCTTTACATGGGCTT  
ATATGCCTATGAAAATTGTAATACAACCTTTCAGCAACGGATCTCTTGGCTCTCGCATCGA  
TGAAGAACGCAGCGAAATGCGATAAGTAATGTGAATTGCAGAATTCAGTGAATCATCGAA  
TCTTTGAACGCATCTTGCGCTCCTTGGTATTCCGAGGAGCATGCCTGTTTGAGTGTCAATT  
AAATTCTCAACTCTCTTCTAC--TTTTGTAAAAGAGAGCTTGGACTGTGGAGGCTTGCT  
GGCCACTTTTTGGGGTCAGCTCCTCTGAAATGCATTAGCGGAACCGTTTGCGATCTGCCA  
CAAGTGTGATAAGTTATCTACACTGGCGAGGGGATTGCTCTCTGTAATGTTTCAGCTTCTA  
ATTGTCTCTACTTTGTGAGACTACTTTTGAATGCTTGACCTCAAATCAGGTAGGACTACC  
CGCTGAACTTAA

>ABC2-9

TTTCCGTAGGTGAACCTGCGGAAGGATCATTATTGAATTATGTTTCTAGATAGGTTGTAG  
CTGGCTC-TTTAGAGCATGTGCACGCCTGTTTGGACTTCATTTTCATCCACCTGTGCACC  
TATTGTAGTCTTTGGTTGGGTTAGGAGGAAGTGGTCATTGTGTCAGCATCTGCTGGATGT  
GAGGACTTGCAATTGTGAAAGCTTTGCTGTCCTTGATGTGATCATGGAATCTCTTTCTCAC  
TAGAGTCTATGTCACCTCATTATACTCTGTGCAATGTCATTGAATGTCTTTACATGGGCTT  
ATATGCCTATGAAAATTGTAATACAACCTTTCAGCAACGGATCTCTTGGCTCTCGCATCGA  
TGAAGAACGCAGCGAAATGCGATAAGTAATGTGAATTGCAGAATTCAGTGAATCATCGAA  
TCTTTGAACGCATCTTGCGCTCCTTGGTATTCCGAGGAGCATGCCTGTTTGAGTGTCAATT  
AAATTCTCAACTCTCTTCTAC--TTTTGTAAAAGAGAGCTTGGACTGTGGAGGCTTGCT  
GGCCACTTTTTGGGGTCAGCTCCTCTGAAATGCATTAGCGGAACCGTTTGCGATCTGCCA  
CAAGTGTGATAAGTTATCTACACTGGCGAGGGGATTGCTCTCTGTAATGTTTCAGCTTCTA  
ATTGTCTCTACTTTGTGAGACTACTTTTGAATGCTTGACCTCAAATCAGGTAGGACTACC  
CGCTGAACTTAA

>ABC2-33

TTTCCGTAGGTGAACCTGCGGAAGGATCATTATTGAATTATGTTTCTAGATAGGTTGTAG  
CTGGCTC-TTTAGAGCATGTGCACGCCTGTTTGGACTTCATTTTCATCCACCTGTGCACC  
TATTGTAGTCTTTGGTTGGGTTAGGAGGAAGTGGTCATTGTGTCAGCATCTGCTGGATGT  
GAGGACTTGCAATTGTGAAAGCTTTGCTGTCCTTGATGTGATCATGGAATCTCTTTCTCAC  
TAGAGTCTATGTCACCTCATTATACTCTGTGCAATGTCATTGAATGTCTTTACATGGGCTT  
ATATGCCTATGAAAATTGTAATACAACCTTTCAGCAACGGATCTCTTGGCTCTCGCATCGA  
TGAAGAACGCAGCGAAATGCGATAAGTAATGTGAATTGCAGAATTCAGTGAATCATCGAA  
TCTTTGAACGCATCTTGCGCTCCTTGGTATTCCGAGGAGCATGCCTGTTTGAGTGTCAATT  
AAATTCTCAACTCTCTTCTAC--TTTTGTAAAAGAGAGCTTGGACTGTGGAGGCTTGCT  
GGCCACTTTTTGGGGTCAGCTCCTCTGAAATGCATTAGCGGAACCGTTTGCGATCTGCCA  
CAAGTGTGATAAGTTATCTACACTGGCGAGGGGATTGCTCTCTGTAATGTTTCAGCTTCTA  
ATTGTCTCTACTTTGTGAGACTACTTTTGAATGCTTGACCTCAAATCAGGTAGGACTACC  
CGCTGAACTTAA

>ABC2-34

TTTCCGTAGGTGAACCTGCGGAAGGATCATTATTGAATTATGTTTCTAGATAGGTTGTAG



CTGGCTC-TTTAGAGCATGTGCACGCCTGTTTGGACTTCATTTTCATCCACCTGTGCACC  
TATTGTAGTCTTTGGTTGGGTTAGGAGGAAGTGGTCATTGTGTCAGCATCTGCTGGATGT  
GAGGACTTGCATTGTGAAAGCTTTGCTGTCCTTGATGTGATCATGGAATCTCTTTCTCAC  
TAGAGTCTATGTCACCTATTATACTCTGTGCAATGTCATTGAATGTCTTTACATGGGCTT  
ATATGCCTATGAAAATTGTAATACAACCTTTCAGCAACGGATCTCTTGGCTCTCGCATCGA  
TGAAGAACGCAGCGAAATGCGATAAGTAATGTGAATTGCAGAATTCAGTGAATCATCGAA  
TCTTTGAACGCATCTTGCCTCCTTGGTATTCCGAGGAGCATGCCTGTTTGAGTGTCAAT  
AAATTCTCAACTCTCTTCTAC--TTTTTGTAAGAGAGCTTGGACTGTGGAGGCTTGCT  
GGCCACTTTTTGGGGTCAGCTCCTCTGAAATGCATTAGCGGAACCGTTTGCGATCTGCCA  
CAAGTGTGATAAGTTATCTACACTGGCGAGGGGATTGCTCTCTGTAATGTTTCAGCTTCTA  
ATTGTCTCTACTTTGTGAGACTACTTTTGAATGCTTGACCTCAAATCAGGTAGGACTACC  
CGCTGAACTTAA

>ABC2-39

TTTCCGTAGGTGAACCTGCGGAAGGATCATTATTGAATTATGTTTCTAGATAGGTTGTAG  
CTGGCTC-TTTAGAGCATGTGCACGCCTGTTTGGACTTCATTTTCATCCACCTGTGCACC  
TATTGTAGTCTTTGGTTGGGTTAGGAGGAAGTGGTCATTGTGTCAGCATCTGCTGGATGT  
GAGGACTTGCATTGTGAAAGCTTTGCTGTCCTTGATGTGATCATGGAATCTCTTTCTCAC  
TAGAGTCTATGTCACCTATTATACTCTGTGCAATGTCATTGAATGTCTTTACATGGGCTT  
ATATGCCTATGAAAATTGTAATACAACCTTTCAGCAACGGATCTCTTGGCTCTCGCATCGA  
TGAAGAACGCAGCGAAATGCGATAAGTAATGTGAATTGCAGAATTCAGTGAATCATCGAA  
TCTTTGAACGCATCTTGCCTCCTTGGTATTCCGAGGAGCATGCCTGTTTGAGTGTCAAT  
AAATTCTCAACTCTCTTCTAC--TTTTTGTAAGAGAGCTTGGACTGTGGAGGCTTGCT  
GGCCACTTTTTGGGGTCAGCTCCTCTGAAATGCATTAGCGGAACCGTTTGCGATCTGCCA  
CAAGTGTGATAAGTTATCTACACTGGCGAGGGGATTGCTCTCTGTAATGTTTCAGCTTCTA  
ATTGTCTCTACTTTGTGAGACTACTTTTGAATGCTTGACCTCAAATCAGGTAGGACTACC  
CGCTGAACTTAA

>ABC2-44

TTTCCGTAGGTGAACCTGCGGAAGGATCATTATTGAATTATGTTTCTAGATAGGTTGTAG  
CTGGCTC-TTTAGAGCATGTGCACGCCTGTTTGGACTTCATTTTCATCCACCTGTGCACC  
TATTGTAGTCTTTGGTTGGGTTAGGAGGAAGTGGTCATTGTGTCAGCATCTGCTGGATGT  
GAGGACTTGCATTGTGAAAGCTTTGCTGTCCTTGATGTGATCATGGAATCTCTTTCTCAC  
TAGAGTCTATGTCACCTATTATACTCTGTGCAATGTCATTGAATGTCTTTACATGGGCTT  
ATATGCCTATGAAAATTGTAATACAACCTTTCAGCAACGGATCTCTTGGCTCTCGCATCGA  
TGAAGAACGCAGCGAAATGCGATAAGTAATGTGAATTGCAGAATTCAGTGAATCATCGAA  
TCTTTGAACGCATCTTGCCTCCTTGGTATTCCGAGGAGCATGCCTGTTTGAGTGTCAAT  
AAATTCTCAACTCTCTTCTAC--TTTTTGTAAGAGAGCTTGGACTGTGGAGGCTTGCT  
GGCCACTTTTTGGGGTCAGCTCCTCTGAAATGCATTAGCGGAACCGTTTGCGATCTGCCA  
CAAGTGTGATAAGTTATCTACACTGGCGAGGGGATTGCTCTCTGTAATGTTTCAGCTTCTA  
ATTGTCTCTACTTTGTGAGACTACTTTTGAATGCTTGACCTCAAATCAGGTAGGACTACC  
CGCTGAACTTAA

>ABC2-47

TTTCCGTAGGTGAACCTGCGGAAGGATCATTATTGAATTATGTTTCTAGATAGGTTGTAG  
CTGGCTC-TTTAGAGCATGTGCACGCCTGTTTGGACTTCATTTTCATCCACCTGTGCACC  
TATTGTAGTCTTTGGTTGGGTTAGGAGGAAGTGGTCATTGTGTCAGCATCTGCTGGATGT  
GAGGACTTGCATTGTGAAAGCTTTGCTGTCCTTGATGTGATCATGGAATCTCTTTCTCAC  
TAGAGTCTATGTCACCTATTATACTCTGTGCAATGTCATTGAATGTCTTTACATGGGCTT  
ATATGCCTATGAAAATTGTAATACAACCTTTCAGCAACGGATCTCTTGGCTCTCGCATCGA  
TGAAGAACGCAGCGAAATGCGATAAGTAATGTGAATTGCAGAATTCAGTGAATCATCGAA  
TCTTTGAACGCATCTTGCCTCCTTGGTATTCCGAGGAGCATGCCTGTTTGAGTGTCAAT  
AAATTCTCAACTCTCTTCTAC--TTTTTGTAAGAGAGCTTGGACTGTGGAGGCTTGCT



GGCCACTTTTTGGGGTCAGCTCCTCTGAAATGCATTAGCGGAACCGTTTGCGATCTGCCA  
CAAGTGTGATAAGTTATCTACACTGGCGAGGGGATTGCTCTCTGTAATGTTGAGCTTCTA  
ATTGTCTCTACTTTGTGAGACTACTTTTGAATGCTTGACCTCAAATCAGGTAGGACTACC  
CGCTGAACTTAA

>ABC2-68

TTTCCGTAGGTGAACCTGCGGAAGGATCATTATTGAATTATGTTTCTAGATAGGTTGTAG  
CTGGCTC-TTTAGAGCATGTGCACGCCTGTTTGGACTTCATTTTCATCCACCTGTGCACC  
TATTGTAGTCTTTGGTTGGGTTAGGAGGAAGTGGTCATTGTGTCAGCATCTGCTGGATGT  
GAGGACTTGCATTGTGAAAGCTTTGCTGTCCTTGATGTGATCATGGAATCTCTTTCTCAC  
TAGAGTCTATGTCACTCATTATACTCTGTGCAATGTCATTGAATGTCTTTACATGGGCTT  
ATATGCCTATGAAAATTGTAATAACAACCTTTGAGCAACGGATCTCTTGGCTCTCGCATCGA  
TGAAGAACGCAGCGAAATGCGATAAGTAATGTGAATTGCAGAATTCAGTGAATCATCGAA  
TCTTTGAACGCATCTTGCGCTCCTTGGTATTCCGAGGAGCATGCCTGTTTGAGTGTGATT  
AAATTCTCAACTCTCTTCTAC--TTTTTGTAAGAGAGCTTGGACTGTGGAGGCTTGCT  
GGCCACTTTTTGGGGTCAGCTCCTCTGAAATGCATTAGCGGAACCGTTTGCGATCTGCCA  
CAAGTGTGATAAGTTATCTACACTGGCGAGGGGATTGCTCTCTGTAATGTTGAGCTTCTA  
ATTGTCTCTACTTTGTGAGACTACTTTTGAATGCTTGACCTCAAATCAGGTAGGACTACC  
CGCTGAACTTAA

>ABC2-75

TTTCCGTAGGTGAACCTGCGGAAGGATCATTATTGAATTATGTTTCTAGATAGGTTGTAG  
CTGGCTC-TTTAGAGCATGTGCACGCCTGTTTGGACTTCATTTTCATCCACCTGTGCACC  
TATTGTAGTCTTTGGTTGGGTTAGGAGGAAGTGGTCATTGTGTCAGCATCTGCTGGATGT  
GAGGACTTGCATTGTGAAAGCTTTGCTGTCCTTGATGTGATCATGGAATCTCTTTCTCAC  
TAGAGTCTATGTCACTCATTATACTCTGTGCAATGTCATTGAATGTCTTTACATGGGCTT  
ATATGCCTATGAAAATTGTAATAACAACCTTTGAGCAACGGATCTCTTGGCTCTCGCATCGA  
TGAAGAACGCAGCGAAATGCGATAAGTAATGTGAATTGCAGAATTCAGTGAATCATCGAA  
TCTTTGAACGCATCTTGCGCTCCTTGGTATTCCGAGGAGCATGCCTGTTTGAGTGTGATT  
AAATTCTCAACTCTCTTCTAC--TTTTTGTAAGAGAGCTTGGACTGTGGAGGCTTGCT  
GGCCACTTTTTGGGGTCAGCTCCTCTGAAATGCATTAGCGGAACCGTTTGCGATCTGCCA  
CAAGTGTGATAAGTTATCTACACTGGCGAGGGGATTGCTCTCTGTAATGTTGAGCTTCTA  
ATTGTCTCTACTTTGTGAGACTACTTTTGAATGCTTGACCTCAAATCAGGTAGGACTACC  
CGCTGAACTTAA

>ABC2-79

TTTCCGTAGGTGAACCTGCGGAAGGATCATTATTGAATTATGTTTCTAGATAGGTTGTAG  
CTGGCTC-TTTAGAGCATGTGCACGCCTGTTTGGACTTCATTTTCATCCACCTGTGCACC  
TATTGTAGTCTTTGGTTGGGTTAGGAGGAAGTGGTCATTGTGTCAGCATCTGCTGGATGT  
GAGGACTTGCATTGTGAAAGCTTTGCTGTCCTTGATGTGATCATGGAATCTCTTTCTCAC  
TAGAGTCTATGTCACTCATTATACTCTGTGCAATGTCATTGAATGTCTTTACATGGGCTT  
ATATGCCTATGAAAATTGTAATAACAACCTTTGAGCAACGGATCTCTTGGCTCTCGCATCGA  
TGAAGAACGCAGCGAAATGCGATAAGTAATGTGAATTGCAGAATTCAGTGAATCATCGAA  
TCTTTGAACGCATCTTGCGCTCCTTGGTATTCCGAGGAGCATGCCTGTTTGAGTGTGATT  
AAATTCTCAACTCTCTTCTAC--TTTTTGTAAGAGAGCTTGGACTGTGGAGGCTTGCT  
GGCCACTTTTTGGGGTCAGCTCCTCTGAAATGCATTAGCGGAACCGTTTGCGATCTGCCA  
CAAGTGTGATAAGTTATCTACACTGGCGAGGGGATTGCTCTCTGTAATGTTGAGCTTCTA  
ATTGTCTCTACTTTGTGAGACTACTTTTGAATGCTTGACCTCAAATCAGGTAGGACTACC  
CGCTGAACTTAA

>ABC3-2

TTTCCGTAGGTGAACCTGCGGAAGGATCATTATTGAATTATGTTTCTAGATAGGTTGTAG  
CTGGCTC-TTTAGAGCATGTGCACGCCTGTTTGGACTTCATTTTCATCCACCTGTGCACC  
TATTGTAGTCTTTGGTTGGGTTAGGAGGAAGTGGTCATTGTGTCAGCATCTGCTGGATGT



GAGGACTTGCATTGTGAAAGCTTTGCTGTCCTTGATGTGATCATGGAATCTCTTTCTCAC  
TAGAGTCTATGTCACCTATTATACTCTGTGCAATGTCATTGAATGTCTTTACATGGGCTT  
ATATGCCTATGAAAATTGTAATACTTTTTCAGCAACGGATCTCTTGGCTCTCGCATCGA  
TGAAGAACGCAGCGAAATGCGATAAGTAATGTGAATTGCAGAATTCAGTGAATCATCGAA  
TCTTTGAACGCATCTTGCCTCCTTGGTATTCCGAGGAGCATGCCTGTTTGAGTGTGATT  
AAATTCTCAACTCTCTTCTAC--TTTTTGAAAAGAGAGCTTGGACTGTGGAGGCTTGCT  
GGCCACTTTTTGGGGTCAGCTCCTCTGAAATGCATTAGCGGAACCGTTTGCGATCTGCCA  
CAAGTGTGATAAGTTATCTACACTGGCGAGGGGATTGCTCTCTGTAATGTTTCTAGCTTCTA  
ATTGTCTCTACTTTGTGAGACTACTTTTGAATGCTTGACCTCAAATCAGGTAGGACTACC  
CGCTGAACCTAA

>ABC3-4

TTTCCGTAGGTGAACCTGCGGAAGGATCATTATTGAATTATGTTTCTAGATAGGTTGTAG  
CTGGCTC-TTLAGAGCATGTGCACGCCTGTTTGGACTTCATTTTCATCCACCTGTGCACC  
TATTGTAGTCTTTGGTTGGGTTAGGAGGAAGTGGTCATTGTGTCAGCATCTGCTGGATGT  
GAGGACTTGCATTGTGAAAGCTTTGCTGTCCTTGATGTGATCATGGAATCTCTTTCTCAC  
TAGAGTCTATGTCACCTATTATACTCTGTGCAATGTCATTGAATGTCTTTACATGGGCTT  
ATATGCCTATGAAAATTGTAATACTTTTTCAGCAACGGATCTCTTGGCTCTCGCATCGA  
TGAAGAACGCAGCGAAATGCGATAAGTAATGTGAATTGCAGAATTCAGTGAATCATCGAA  
TCTTTGAACGCATCTTGCCTCCTTGGTATTCCGAGGAGCATGCCTGTTTGAGTGTGATT  
AAATTCTCAACTCTCTTCTAC--TTTTTGAAAAGAGAGCTTGGACTGTGGAGGCTTGCT  
GGCCACTTTTTGGGGTCAGCTCCTCTGAAATGCATTAGCGGAACCGTTTGCGATCTGCCA  
CAAGTGTGATAAGTTATCTACACTGGCGAGGGGATTGCTCTCTGTAATGTTTCTAGCTTCTA  
ATTGTCTCTACTTTGTGAGACTACTTTTGAATGCTTGACCTCAAATCAGGTAGGACTACC  
CGCTGAACCTAA

>ABC3-8

TTTCCGTAGGTGAACCTGCGGAAGGATCATTATTGAATTATGTTTCTAGATAGGTTGTAG  
CTGGCTC-TTLAGAGCATGTGCACGCCTGTTTGGACTTCATTTTCATCCACCTGTGCACC  
TATTGTAGTCTTTGGTTGGGTTAGGAGGAAGTGGTCATTGTGTCAGCATCTGCTGGATGT  
GAGGACTTGCATTGTGAAAGCTTTGCTGTCCTTGATGTGATCATGGAATCTCTTTCTCAC  
TAGAGTCTATGTCACCTATTATACTCTGTGCAATGTCATTGAATGTCTTTACATGGGCTT  
ATATGCCTATGAAAATTGTAATACTTTTTCAGCAACGGATCTCTTGGCTCTCGCATCGA  
TGAAGAACGCAGCGAAATGCGATAAGTAATGTGAATTGCAGAATTCAGTGAATCATCGAA  
TCTTTGAACGCATCTTGCCTCCTTGGTATTCCGAGGAGCATGCCTGTTTGAGTGTGATT  
AAATTCTCAACTCTCTTCTAC--TTTTTGAAAAGAGAGCTTGGACTGTGGAGGCTTGCT  
GGCCACTTTTTGGGGTCAGCTCCTCTGAAATGCATTAGCGGAACCGTTTGCGATCTGCCA  
CAAGTGTGATAAGTTATCTACACTGGCGAGGGGATTGCTCTCTGTAATGTTTCTAGCTTCTA  
ATTGTCTCTACTTTGTGAGACTACTTTTGAATGCTTGACCTCAAATCAGGTAGGACTACC  
CGCTGAACCTAA

>ABC3-27

TTTCCGTAGGTGAACCTGCGGAAGGATCATTATTGAATTATGTTTCTAGATAGGTTGTAG  
CTGGCTC-TTLAGAGCATGTGCACGCCTGTTTGGACTTCATTTTCATCCACCTGTGCACC  
TATTGTAGTCTTTGGTTGGGTTAGGAGGAAGTGGTCATTGTGTCAGCATCTGCTGGATGT  
GAGGACTTGCATTGTGAAAGCTTTGCTGTCCTTGATGTGATCATGGAATCTCTTTCTCAC  
TAGAGTCTATGTCACCTATTATACTCTGTGCAATGTCATTGAATGTCTTTACATGGGCTT  
ATATGCCTATGAAAATTGTAATACTTTTTCAGCAACGGATCTCTTGGCTCTCGCATCGA  
TGAAGAACGCAGCGAAATGCGATAAGTAATGTGAATTGCAGAATTCAGTGAATCATCGAA  
TCTTTGAACGCATCTTGCCTCCTTGGTATTCCGAGGAGCATGCCTGTTTGAGTGTGATT  
AAATTCTCAACTCTCTTCTAC--TTTTTGAAAAGAGAGCTTGGACTGTGGAGGCTTGCT  
GGCCACTTTTTGGGGTCAGCTCCTCTGAAATGCATTAGCGGAACCGTTTGCGATCTGCCA  
CAAGTGTGATAAGTTATCTACACTGGCGAGGGGATTGCTCTCTGTAATGTTTCTAGCTTCTA



ATTGTCTCTACTTTGTGAGACTACTTTTGAATGCTTGACCTCAAATCAGGTAGGACTACC  
CGCTGAACTTAA

>ABC3-31

TTTCCGTAGGTGAACCTGCGGAAGGATCATTATTGAATTATGTTTCTAGATAGGTTGTAG  
CTGGCTC-TTTAGAGCATGTGCACGCCTGTTTGGACTTCATTTTCATCCACCTGTGCACC  
TATTGTAGTCTTTGGTTGGGTTAGGAGGAAGTGGTCATTGTGTCAGCATCTGCTGGATGT  
GAGGACTTGCATTGTGAAAGCTTTGCTGTCCTTGATGTGATCATGGAATCTCTTTCTCAC  
TAGAGTCTATGTCACTCATTATACTCTGTGCAATGTCATTGAATGTCTTTACATGGGCTT  
ATATGCCTATGAAAATTGTAATAACAACCTTTCAGCAACGGATCTCTTGGCTCTCGCATCGA  
TGAAGAACGCAGCGAAATGCGATAAGTAATGTGAATTGCAGAATTCAGTGAATCATCGAA  
TCTTTGAACGCATCTTGCCTCCTTGGTATTCCGAGGAGCATGCCTGTTTGAGTGTCAAT  
AAATTCTCAACTCTCTTCTAC--TTTTGTAAAAGAGAGCTTGGACTGTGGAGGCTTGCT  
GGCCACTTTTTGGGGTCAGCTCCTCTGAAATGCATTAGCGGAACCGTTTGCGATCTGCCA  
CAAGTGTGATAAGTTATCTACACTGGCGAGGGGATTGCTCTCTGTAATGTTTCAGCTTCTA  
ATTGTCTCTACTTTGTGAGACTACTTTTGAATGCTTGACCTCAAATCAGGTAGGACTACC  
CGCTGAACTTAA

>ABC3-50

TTTCCGTAGGTGAACCTGCGGAAGGATCATTATTGAATTATGTTTCTAGATAGGTTGTAG  
CTGGCTC-TTTAGAGCATGTGCACGCCTGTTTGGACTTCATTTTCATCCACCTGTGCACC  
TATTGTAGTCTTTGGTTGGGTTAGGAGGAAGTGGTCATTGTGTCAGCATCTGCTGGATGT  
GAGGACTTGCATTGTGAAAGCTTTGCTGTCCTTGATGTGATCATGGAATCTCTTTCTCAC  
TAGAGTCTATGTCACTCATTATACTCTGTGCAATGTCATTGAATGTCTTTACATGGGCTT  
ATATGCCTATGAAAATTGTAATAACAACCTTTCAGCAACGGATCTCTTGGCTCTCGCATCGA  
TGAAGAACGCAGCGAAATGCGATAAGTAATGTGAATTGCAGAATTCAGTGAATCATCGAA  
TCTTTGAACGCATCTTGCCTCCTTGGTATTCCGAGGAGCATGCCTGTTTGAGTGTCAAT  
AAATTCTCAACTCTCTTCTAC--TTTTGTAAAAGAGAGCTTGGACTGTGGAGGCTTGCT  
GGCCACTTTTTGGGGTCAGCTCCTCTGAAATGCATTAGCGGAACCGTTTGCGATCTGCCA  
CAAGTGTGATAAGTTATCTACACTGGCGAGGGGATTGCTCTCTGTAATGTTTCAGCTTCTA  
ATTGTCTCTACTTTGTGAGACTACTTTTGAATGCTTGACCTCAAATCAGGTAGGACTACC  
CGCTGAACTTAA

>ABC3-69

TTTCCGTAGGTGAACCTGCGGAAGGATCATTATTGAATTATGTTTCTAGATAGGTTGTAG  
CTGGCTC-TTTAGAGCATGTGCACGCCTGTTTGGACTTCATTTTCATCCACCTGTGCACC  
TATTGTAGTCTTTGGTTGGGTTAGGAGGAAGTGGTCATTGTGTCAGCATCTGCTGGATGT  
GAGGACTTGCATTGTGAAAGCTTTGCTGTCCTTGATGTGATCATGGAATCTCTTTCTCAC  
TAGAGTCTATGTCACTCATTATACTCTGTGCAATGTCATTGAATGTCTTTACATGGGCTT  
ATATGCCTATGAAAATTGTAATAACAACCTTTCAGCAACGGATCTCTTGGCTCTCGCATCGA  
TGAAGAACGCAGCGAAATGCGATAAGTAATGTGAATTGCAGAATTCAGTGAATCATCGAA  
TCTTTGAACGCATCTTGCCTCCTTGGTATTCCGAGGAGCATGCCTGTTTGAGTGTCAAT  
AAATTCTCAACTCTCTTCTAC--TTTTGTAAAAGAGAGCTTGGACTGTGGAGGCTTGCT  
GGCCACTTTTTGGGGTCAGCTCCTCTGAAATGCATTAGCGGAACCGTTTGCGATCTGCCA  
CAAGTGTGATAAGTTATCTACACTGGCGAGGGGATTGCTCTCTGTAATGTTTCAGCTTCTA  
ATTGTCTCTACTTTGTGAGACTACTTTTGAATGCTTGACCTCAAATCAGGTAGGACTACC  
CGCTGAACTTAA

>ABC4-4

TTTCCGTAGGTGAACCTGCGGAAGGATCATTATTGAATTATGTTTCTAGATAGGTTGTAG  
CTGGCTC-TTTAGAGCATGTGCACGCCTGTTTGGACTTCATTTTCATCCACCTGTGCACC  
TATTGTAGTCTTTGGTTGGGTTAGGAGGAAGTGGTCATTGTGTCAGCATCTGCTGGATGT  
GAGGACTTGCATTGTGAAAGCTTTGCTGTCCTTGATGTGATCATGGAATCTCTTTCTCAC  
TAGAGTCTATGTCACTCATTATACTCTGTGCAATGTCATTGAATGTCTTTACATGGGCTT



ATATGCCTATGAAAATTGTAATACAACCTTTTCAGCAACGGATCTCTTGGCTCTCGCATCGA  
TGAAGAACGCAGCGAAATGCGATAAGTAATGTGAATTGCAGAATTCAGTGAATCATCGAA  
TCTTTGAACGCATCTTGCCTCCTTGGTATTCCGAGGAGCATGCCTGTTTGAGTGTCAAT  
AAATTCTCAACTCTCTTCTAC--TTTTTGAAAAGAGAGCTTGGACTGTGGAGGCTTGCT  
GGCCACTTTTTGGGGTCAGCTCCTCTGAAATGCATTAGCGGAACCGTTTGCGATCTGCCA  
CAAGTGTGATAAGTTATCTACACTGGCGAGGGGATTGCTCTCTGTAATGTTTCAGCTTCTA  
ATTGTCTCTACTTTGTGAGACTACTTTTGAATGCTTGACCTCAAATCAGGTAGGACTACC  
CGCTGAACTTAA

>ABC4-9

TTTCCGTAGGTGAACCTGCGGAAGGATCATTATTGAATTATGTTTCTAGATAGGTTGTAG  
CTGGCTC-TTLAGAGCATGTGCACGCCTGTTTGGACTTCATTTTCATCCACCTGTGCACC  
TATTGTAGTCTTTGGTTGGGTTAGGAGGAAGTGGTCATTGTGTCAGCATCTGCTGGATGT  
GAGGACTTGCATTGTGAAAGCTTTGCTGTCCTTGATGTGATCATGGAATCTCTTTCTCAC  
TAGAGTCTATGTCACCTCATTATACTCTGTCTGAATGTCATTGAATGTCTTTACATGGGCTT  
ATATGCCTATGAAAATTGTAATACAACCTTTTCAGCAACGGATCTCTTGGCTCTCGCATCGA  
TGAAGAACGCAGCGAAATGCGATAAGTAATGTGAATTGCAGAATTCAGTGAATCATCGAA  
TCTTTGAACGCATCTTGCCTCCTTGGTATTCCGAGGAGCATGCCTGTTTGAGTGTCAAT  
AAATTCTCAACTCTCTTCTAC--TTTTTGAAAAGAGAGCTTGGACTGTGGAGGCTTGCT  
GGCCACTTTTTGGGGTCAGCTCCTCTGAAATGCATTAGCGGAACCGTTTGCGATCTGCCA  
CAAGTGTGATAAGTTATCTACACTGGCGAGGGGATTGCTCTCTGTAATGTTTCAGCTTCTA  
ATTGTCTCTACTTTGTGAGACTACTTTTGAATGCTTGACCTCAAATCAGGTAGGACTACC  
CGCTGAACTTAA

>ABC4-12

TTTCCGTAGGTGAACCTGCGGAAGGATCATTATTGAATTATGTTTCTAGATAGGTTGTAG  
CTGGCTC-TTLAGAGCATGTGCACGCCTGTTTGGACTTCATTTTCATCCACCTGTGCACC  
TATTGTAGTCTTTGGTTGGGTTAGGAGGAAGTGGTCATTGTGTCAGCATCTGCTGGATGT  
GAGGACTTGCATTGTGAAAGCTTTGCTGTCCTTGATGTGATCATGGAATCTCTTTCTCAC  
TAGAGTCTATGTCACCTCATTATACTCTGTCTGAATGTCATTGAATGTCTTTACATGGGCTT  
ATATGCCTATGAAAATTGTAATACAACCTTTTCAGCAACGGATCTCTTGGCTCTCGCATCGA  
TGAAGAACGCAGCGAAATGCGATAAGTAATGTGAATTGCAGAATTCAGTGAATCATCGAA  
TCTTTGAACGCATCTTGCCTCCTTGGTATTCCGAGGAGCATGCCTGTTTGAGTGTCAAT  
AAATTCTCAACTCTCTTCTAC--TTTTTGAAAAGAGAGCTTGGACTGTGGAGGCTTGCT  
GGCCACTTTTTGGGGTCAGCTCCTCTGAAATGCATTAGCGGAACCGTTTGCGATCTGCCA  
CAAGTGTGATAAGTTATCTACACTGGCGAGGGGATTGCTCTCTGTAATGTTTCAGCTTCTA  
ATTGTCTCTACTTTGTGAGACTACTTTTGAATGCTTGACCTCAAATCAGGTAGGACTACC  
CGCTGAACTTAA

>ABC4-16

TTTCCGTAGGTGAACCTGCGGAAGGATCATTATTGAATTATGTTTCTAGATAGGTTGTAG  
CTGGCTC-TTLAGAGCATGTGCACGCCTGTTTGGACTTCATTTTCATCCACCTGTGCACC  
TATTGTAGTCTTTGGTTGGGTTAGGAGGAAGTGGTCATTGTGTCAGCATCTGCTGGATGT  
GAGGACTTGCATTGTGAAAGCTTTGCTGTCCTTGATGTGATCATGGAATCTCTTTCTCAC  
TAGAGTCTATGTCACCTCATTATACTCTGTCTGAATGTCATTGAATGTCTTTACATGGGCTT  
ATATGCCTATGAAAATTGTAATACAACCTTTTCAGCAACGGATCTCTTGGCTCTCGCATCGA  
TGAAGAACGCAGCGAAATGCGATAAGTAATGTGAATTGCAGAATTCAGTGAATCATCGAA  
TCTTTGAACGCATCTTGCCTCCTTGGTATTCCGAGGAGCATGCCTGTTTGAGTGTCAAT  
AAATTCTCAACTCTCTTCTAC--TTTTTGAAAAGAGAGCTTGGACTGTGGAGGCTTGCT  
GGCCACTTTTTGGGGTCAGCTCCTCTGAAATGCATTAGCGGAACCGTTTGCGATCTGCCA  
CAAGTGTGATAAGTTATCTACACTGGCGAGGGGATTGCTCTCTGTAATGTTTCAGCTTCTA  
ATTGTCTCTACTTTGTGAGACTACTTTTGAATGCTTGACCTCAAATCAGGTAGGACTACC  
CGCTGAACTTAA



>ABC4-17

TTTCCGTAGGTGAACCTGCGGAAGGATCATTATTGAATTATGTTTCTAGATAGGTTGTAG  
CTGGCTC-TTTAGAGCATGTGCACGCCTGTTTGGACTTCATTTTCATCCACCTGTGCACC  
TATTGTAGTCTTTGGTTGGGTTAGGAGGAAGTGGTCATTGTGTCAGCATCTGCTGGATGT  
GAGGACTTGCATTGTGAAAGCTTTGCTGTCCTTGATGTGATCATGGAATCTCTTTCTCAC  
TAGAGTCTATGTCACCTCATTATACTCTGTGCGAATGTCATTGAATGTCTTTACATGGGCTT  
ATATGCCTATGAAAATTGTAATACAACCTTTCAGCAACGGATCTCTTGGCTCTCGCATCGA  
TGAAGAACGCAGCGAAATGCGATAAGTAATGTGAATTGCAGAATTCAGTGAATCATCGAA  
TCTTTGAACGCATCTTGCCTCCTTGGTATTCCGAGGAGCATGCCTGTTTGAGTGTCTATT  
AAATTCTCAACTCTCTTCTAC--TTTTGTAAAAGAGAGCTTGGACTGTGGAGGCTTGCT  
GGCCACTTTTTGGGGTCAGCTCCTCTGAAATGCATTAGCGGAACCGTTTGCGATCTGCCA  
CAAGTGTGATAAGTTATCTACACTGGCGAGGGGATTGCTCTCTGTAATGTTTCAGCTTCTA  
ATTGTCTCTACTTTGTGAGACTACTTTTGAATGCTTGACCTCAAATCAGGTAGGACTACC  
CGCTGAACTTAA

>ABC4-36

TTTCCGTAGGTGAACCTGCGGAAGGATCATTATTGAATTATGTTTCTAGATAGGTTGTAG  
CTGGCTC-TTTAGAGCATGTGCACGCCTGTTTGGACTTCATTTTCATCCACCTGTGCACC  
TATTGTAGTCTTTGGTTGGGTTAGGAGGAAGTGGTCATTGTGTCAGCATCTGCTGGATGT  
GAGGACTTGCATTGTGAAAGCTTTGCTGTCCTTGATGTGATCATGGAATCTCTTTCTCAC  
TAGAGTCTATGTCACCTCATTATACTCTGTGCGAATGTCATTGAATGTCTTTACATGGGCTT  
ATATGCCTATGAAAATTGTAATACAACCTTTCAGCAACGGATCTCTTGGCTCTCGCATCGA  
TGAAGAACGCAGCGAAATGCGATAAGTAATGTGAATTGCAGAATTCAGTGAATCATCGAA  
TCTTTGAACGCATCTTGCCTCCTTGGTATTCCGAGGAGCATGCCTGTTTGAGTGTCTATT  
AAATTCTCAACTCTCTTCTAC--TTTTGTAAAAGAGAGCTTGGACTGTGGAGGCTTGCT  
GGCCACTTTTTGGGGTCAGCTCCTCTGAAATGCATTAGCGGAACCGTTTGCGATCTGCCA  
CAAGTGTGATAAGTTATCTACACTGGCGAGGGGATTGCTCTCTGTAATGTTTCAGCTTCTA  
ATTGTCTCTACTTTGTGAGACTACTTTTGAATGCTTGACCTCAAATCAGGTAGGACTACC  
CGCTGAACTTAA

>ABC4-46

TTTCCGTAGGTGAACCTGCGGAAGGATCATTATTGAATTATGTTTCTAGATAGGTTGTAG  
CTGGCTC-TTTAGAGCATGTGCACGCCTGTTTGGACTTCATTTTCATCCACCTGTGCACC  
TATTGTAGTCTTTGGTTGGGTTAGGAGGAAGTGGTCATTGTGTCAGCATCTGCTGGATGT  
GAGGACTTGCATTGTGAAAGCTTTGCTGTCCTTGATGTGATCATGGAATCTCTTTCTCAC  
TAGAGTCTATGTCACCTCATTATACTCTGTGCGAATGTCATTGAATGTCTTTACATGGGCTT  
ATATGCCTATGAAAATTGTAATACAACCTTTCAGCAACGGATCTCTTGGCTCTCGCATCGA  
TGAAGAACGCAGCGAAATGCGATAAGTAATGTGAATTGCAGAATTCAGTGAATCATCGAA  
TCTTTGAACGCATCTTGCCTCCTTGGTATTCCGAGGAGCATGCCTGTTTGAGTGTCTATT  
AAATTCTCAACTCTCTTCTAC--TTTTGTAAAAGAGAGCTTGGACTGTGGAGGCTTGCT  
GGCCACTTTTTGGGGTCAGCTCCTCTGAAATGCATTAGCGGAACCGTTTGCGATCTGCCA  
CAAGTGTGATAAGTTATCTACACTGGCGAGGGGATTGCTCTCTGTAATGTTTCAGCTTCTA  
ATTGTCTCTACTTTGTGAGACTACTTTTGAATGCTTGACCTCAAATCAGGTAGGACTACC  
CGCTGAACTTAA

>ABC4-50

TTTCCGTAGGTGAACCTGCGGAAGGATCATTATTGAATTATGTTTCTAGATAGGTTGTAG  
CTGGCTC-TTTAGAGCATGTGCACGCCTGTTTGGACTTCATTTTCATCCACCTGTGCACC  
TATTGTAGTCTTTGGTTGGGTTAGGAGGAAGTGGTCATTGTGTCAGCATCTGCTGGATGT  
GAGGACTTGCATTGTGAAAGCTTTGCTGTCCTTGATGTGATCATGGAATCTCTTTCTCAC  
TAGAGTCTATGTCACCTCATTATACTCTGTGCGAATGTCATTGAATGTCTTTACATGGGCTT  
ATATGCCTATGAAAATTGTAATACAACCTTTCAGCAACGGATCTCTTGGCTCTCGCATCGA  
TGAAGAACGCAGCGAAATGCGATAAGTAATGTGAATTGCAGAATTCAGTGAATCATCGAA



TCTTTGAACGCATCTTGCGCTCCTTGGTATTCCGAGGAGCATGCCTGTTTGAGTGTCAATT  
AAATTCTCAACTCTCTTCTAC--TTTTTGAAAAGAGAGCTTGGACTGTGGAGGCTTGCT  
GGCCACTTTTTGGGGTCAGCTCCTCTGAAATGCATTAGCGGAACCGTTTGCGATCTGCCA  
CAAGTGTGATAAGTTATCTACACTGGCGAGGGGATTGCTCTCTGTAATGTTTCACTTCTA  
ATTGTCTCTACTTTGTGAGACTACTTTTGAATGCTTGACCTCAAATCAGGTAGGACTACC  
CGCTGAACTTAA

>ABC4-62

TTTCCGTAGGTGAACCTGCGGAAGGATCATTATTGAATTATGTTTCTAGATAGGTTGTAG  
CTGGCTC-TTLAGAGCATGTGCACGCCTGTTTGGACTTCATTTTCATCCACCTGTGCACC  
TATTGTAGTCTTTGGTTGGGTTAGGAGGAAGTGGTCATTGTGTCAGCATCTGCTGGATGT  
GAGGACTTGCAATTGTGAAAGCTTTGCTGTCCTTGATGTGATCATGGAATCTCTTTCTCAC  
TAGAGTCTATGTCACCTCATTATACTCTGTGCAATGTCATTGAATGTCTTTACATGGGCTT  
ATATGCCTATGAAAATTGTAATACAACCTTTAGCAACGGATCTCTTGGCTCTCGCATCGA  
TGAAGAACGCAGCGAAATGCGATAAGTAATGTGAATTGCAGAATTCAGTGAATCATCGAA  
TCTTTGAACGCATCTTGCGCTCCTTGGTATTCCGAGGAGCATGCCTGTTTGAGTGTCAATT  
AAATTCTCAACTCTCTTCTAC--TTTTTGAAAAGAGAGCTTGGACTGTGGAGGCTTGCT  
GGCCACTTTTTGGGGTCAGCTCCTCTGAAATGCATTAGCGGAACCGTTTGCGATCTGCCA  
CAAGTGTGATAAGTTATCTACACTGGCGAGGGGATTGCTCTCTGTAATGTTTCACTTCTA  
ATTGTCTCTACTTTGTGAGACTACTTTTGAATGCTTGACCTCAAATCAGGTAGGACTACC  
CGCTGAACTTAA

>ABC4-75

TTTCCGTAGGTGAACCTGCGGAAGGATCATTATTGAATTATGTTTCTAGATAGGTTGTAG  
CTGGCTC-TTLAGAGCATGTGCACGCCTGTTTGGACTTCATTTTCATCCACCTGTGCACC  
TATTGTAGTCTTTGGTTGGGTTAGGAGGAAGTGGTCATTGTGTCAGCATCTGCTGGATGT  
GAGGACTTGCAATTGTGAAAGCTTTGCTGTCCTTGATGTGATCATGGAATCTCTTTCTCAC  
TAGAGTCTATGTCACCTCATTATACTCTGTGCAATGTCATTGAATGTCTTTACATGGGCTT  
ATATGCCTATGAAAATTGTAATACAACCTTTAGCAACGGATCTCTTGGCTCTCGCATCGA  
TGAAGAACGCAGCGAAATGCGATAAGTAATGTGAATTGCAGAATTCAGTGAATCATCGAA  
TCTTTGAACGCATCTTGCGCTCCTTGGTATTCCGAGGAGCATGCCTGTTTGAGTGTCAATT  
AAATTCTCAACTCTCTTCTAC--TTTTTGAAAAGAGAGCTTGGACTGTGGAGGCTTGCT  
GGCCACTTTTTGGGGTCAGCTCCTCTGAAATGCATTAGCGGAACCGTTTGCGATCTGCCA  
CAAGTGTGATAAGTTATCTACACTGGCGAGGGGATTGCTCTCTGTAATGTTTCACTTCTA  
ATTGTCTCTACTTTGTGAGACTACTTTTGAATGCTTGACCTCAAATCAGGTAGGACTACC  
CGCTGAACTTAA

>ABC5-21

TTTCCGTAGGTGAACCTGCGGAAGGATCATTATTGAATTATGTTTCTAGATAGGTTGTAG  
CTGGCTC-TTLAGAGCATGTGCACGCCTGTTTGGACTTCATTTTCATCCACCTGTGCACC  
TATTGTAGTCTTTGGTTGGGTTAGGAGGAAGTGGTCATTGTGTCAGCATCTGCTGGATGT  
GAGGACTTGCAATTGTGAAAGCTTTGCTGTCCTTGATGTGATCATGGAATCTCTTTCTCAC  
TAGAGTCTATGTCACCTCATTATACTCTGTGCAATGTCATTGAATGTCTTTACATGGGCTT  
ATATGCCTATGAAAATTGTAATACAACCTTTAGCAACGGATCTCTTGGCTCTCGCATCGA  
TGAAGAACGCAGCGAAATGCGATAAGTAATGTGAATTGCAGAATTCAGTGAATCATCGAA  
TCTTTGAACGCATCTTGCGCTCCTTGGTATTCCGAGGAGCATGCCTGTTTGAGTGTCAATT  
AAATTCTCAACTCTCTTCTAC--TTTTTGAAAAGAGAGCTTGGACTGTGGAGGCTTGCT  
GGCCACTTTTTGGGGTCAGCTCCTCTGAAATGCATTAGCGGAACCGTTTGCGATCTGCCA  
CAAGTGTGATAAGTTATCTACACTGGCGAGGGGATTGCTCTCTGTAATGTTTCACTTCTA  
ATTGTCTCTACTTTGTGAGACTACTTTTGAATGCTTGACCTCAAATCAGGTAGGACTACC  
CGCTGAACTTAA

>ABC5-25

TTTCCGTAGGTGAACCTGCGGAAGGATCATTATTGAATTATGTTTCTAGATAGGTTGTAG



CTGGCTC-TTTAGAGCATGTGCACGCCTGTTTGGACTTCATTTTCATCCACCTGTGCACC  
TATTGTAGTCTTTGGTTGGGTTAGGAGGAAGTGGTCATTGTGTCAGCATCTGCTGGATGT  
GAGGACTTGCATTGTGAAAGCTTTGCTGTCCTTGATGTGATCATGGAATCTCTTTCTCAC  
TAGAGTCTATGTCACCTATTATACTCTGTGCAATGTCATTGAATGTCTTTACATGGGCTT  
ATATGCCTATGAAAATTGTAATACAACCTTTCAGCAACGGATCTCTTGGCTCTCGCATCGA  
TGAAGAACGCAGCGAAATGCGATAAGTAATGTGAATTGCAGAATTCAGTGAATCATCGAA  
TCTTTGAACGCATCTTGCCTCCTTGGTATTCCGAGGAGCATGCCTGTTTGAGTGTCAAT  
AAATTCTCAACTCTCTTCTAC--TTTTTGTAAGAGAGCTTGGACTGTGGAGGCTTGCT  
GGCCACTTTTTGGGGTCAGCTCCTCTGAAATGCATTAGCGGAACCGTTTGCGATCTGCCA  
CAAGTGTGATAAGTTATCTACACTGGCGAGGGGATTGCTCTCTGTAATGTTTCAGCTTCTA  
ATTGTCTCTACTTTGTGAGACTACTTTTGAATGCTTGACCTCAAATCAGGTAGGACTACC  
CGCTGAACTTAA

>ABC2-51

TTTCCGTAGGTGAACCTGCGGAAGGATCATTATTGAATTATGTTTCTAGATAGGTTGTAG  
CTGGCTC-TTTAGAGCATGTGCACGCCTGTTTGGACTTCATTTTCATCCACCTGTGCACC  
TATTGTAGTCTTTGGTTGGGTTAGGAGGAAGTGGTCATTGTGTCAGCATCTGCTGGATGT  
GAGGACTTGCATTGTGAAAGCTTTGCTGTCCTTGATGTGATCATGGAATCTCTTTCTCAC  
TAGAGTCTATGTCACCTATTATACTCTGTGCAATGTCATTGAATGTCTTTACATGGGCTT  
ATATGCCTATGAAAATTGTAATACAACCTTTCAGCAACGGATCTCTTGGCTCTCGCATCGA  
TGAAGAACGCAGCGAAATGCGATAAGTAATGTGAATTGCAGAATTCAGTGAATCATCGAA  
TCTTTGAACGCATCTTGCCTCCTTGGTATTCCGAGGAGCATGCCTGTTTGAGTGTCAAT  
AAATTCTCAACTCTCTTCTAC--TTTTTGTAAGAGAGCTTGGACTGTGGAGGCTTGCT  
GGCCACTTTTTGGGGTCAGCTCCTCTGAAATGCATTAGCGGAACCGTTTGCGATCTGCCA  
CAAGTGTGATAAGTTATCTACACTGGCGAGGGGATTGCTCTCTGTAATGTTTCAGCTTCTA  
ATTGTCTCTACTTTGTGAGACTACTTTTGAATGCTTGACCTCAAATCAGGTAGGACTACC  
CGCTGAACTTAA

>ABC5-27

TTTCCGTAGGTGAACCTGCGGAAGGATCATTATTGAATTATGTTTCTAGATAGGTTGTAG  
CTGGCTC-TTTAGAGCATGTGCACGCCTGTTTGGACTTCATTTTCATCCACCTGTGCACC  
TATTGTAGTCTTTGGTTGGGTTAGGAGGAAGTGGTCATTGTGTCAGCATCTGCTGGATGT  
GAGGACTTGCATTGTGAAAGCTTTGCTGTCCTTGATGTGATCATGGAATCTCTTTCTCAC  
TAGAGTCTATGTCACCTATTATACTCTGTGCAATGTCATTGAATGTCTTTACATGGGCTT  
ATATGCCTATGAAAATTGTAATACAACCTTTCAGCAACGGATCTCTTGGCTCTCGCATCGA  
TGAAGAACGCAGCGAAATGCGATAAGTAATGTGAATTGCAGAATTCAGTGAATCATCGAA  
TCTTTGAACGCATCTTGCCTCCTTGGTATTCCGAGGAGCATGCCTGTTTGAGTGTCAAT  
AAATTCTCAACTCTCTTCTAC--TTTTTGTAAGAGAGCTTGGACTGTGGAGGCTTGCT  
GGCCACTTTTTGGGGTCAGCTCCTCTGAAATGCATTAGCGGAACCGTTTGCGATCTGCCA  
CAAGTGTGATAAGTTATCTACACTGGCGAGGGGATTGCTCTCTGTAATGTTTCAGCTTCTA  
ATTGTCTCTACTTTGTGAGACTACTTTTGAATGCTTGACCTCAAATCAGGTAGGACTACC  
CGCTGAACTTAA

>ABC5-29

TTTCCGTAGGTGAACCTGCGGAAGGATCATTATTGAATTATGTTTCTAGATAGGTTGTAG  
CTGGCTC-TTTAGAGCATGTGCACGCCTGTTTGGACTTCATTTTCATCCACCTGTGCACC  
TATTGTAGTCTTTGGTTGGGTTAGGAGGAAGTGGTCATTGTGTCAGCATCTGCTGGATGT  
GAGGACTTGCATTGTGAAAGCTTTGCTGTCCTTGATGTGATCATGGAATCTCTTTCTCAC  
TAGAGTCTATGTCACCTATTATACTCTGTGCAATGTCATTGAATGTCTTTACATGGGCTT  
ATATGCCTATGAAAATTGTAATACAACCTTTCAGCAACGGATCTCTTGGCTCTCGCATCGA  
TGAAGAACGCAGCGAAATGCGATAAGTAATGTGAATTGCAGAATTCAGTGAATCATCGAA  
TCTTTGAACGCATCTTGCCTCCTTGGTATTCCGAGGAGCATGCCTGTTTGAGTGTCAAT  
AAATTCTCAACTCTCTTCTAC--TTTTTGTAAGAGAGCTTGGACTGTGGAGGCTTGCT



GGCCACTTTTTGGGGTCAGCTCCTCTGAAATGCATTAGCGGAACCGTTTGCGATCTGCCA  
CAAGTGTGATAAGTTATCTACACTGGCGAGGGGATTGCTCTCTGTAATGTTGAGCTTCTA  
ATTGTCTCTACTTTGTGAGACTACTTTTGAATGCTTGACCTCAAATCAGGTAGGACTACC  
CGCTGAACTTAA

>ABC5-31

TTTCCGTAGGTGAACCTGCGGAAGGATCATTATTGAATTATGTTTCTAGATAGGTTGTAG  
CTGGCTC-TTTAGAGCATGTGCACGCCTGTTTGGACTTCATTTTCATCCACCTGTGCACC  
TATTGTAGTCTTTGGTTGGGTTAGGAGGAAGTGGTCATTGTGTCAGCATCTGCTGGATGT  
GAGGACTTGCATTGTGAAAGCTTTGCTGTCCTTGATGTGATCATGGAATCTCTTTCTCAC  
TAGAGTCTATGTCACTCATTATACTCTGTGCAATGTCATTGAATGTCTTTACATGGGCTT  
ATATGCCTATGAAAATTGTAATAACAACCTTTGAGCAACGGATCTCTTGGCTCTCGCATCGA  
TGAAGAACGCAGCGAAATGCGATAAGTAATGTGAATTGCAGAATTCAGTGAATCATCGAA  
TCTTTGAACGCATCTTGCGCTCCTTGGTATTCCGAGGAGCATGCCTGTTTGAGTGTGATT  
AAATTCTCAACTCTCTTCTAC--TTTTTGTAAGAGAGCTTGGACTGTGGAGGCTTGCT  
GGCCACTTTTTGGGGTCAGCTCCTCTGAAATGCATTAGCGGAACCGTTTGCGATCTGCCA  
CAAGTGTGATAAGTTATCTACACTGGCGAGGGGATTGCTCTCTGTAATGTTGAGCTTCTA  
ATTGTCTCTACTTTGTGAGACTACTTTTGAATGCTTGACCTCAAATCAGGTAGGACTACC  
CGCTGAACTTAA

>ABC5-33

TTTCCGTAGGTGAACCTGCGGAAGGATCATTATTGAATTATGTTTCTAGATAGGTTGTAG  
CTGGCTC-TTTAGAGCATGTGCACGCCTGTTTGGACTTCATTTTCATCCACCTGTGCACC  
TATTGTAGTCTTTGGTTGGGTTAGGAGGAAGTGGTCATTGTGTCAGCATCTGCTGGATGT  
GAGGACTTGCATTGTGAAAGCTTTGCTGTCCTTGATGTGATCATGGAATCTCTTTCTCAC  
TAGAGTCTATGTCACTCATTATACTCTGTGCAATGTCATTGAATGTCTTTACATGGGCTT  
ATATGCCTATGAAAATTGTAATAACAACCTTTGAGCAACGGATCTCTTGGCTCTCGCATCGA  
TGAAGAACGCAGCGAAATGCGATAAGTAATGTGAATTGCAGAATTCAGTGAATCATCGAA  
TCTTTGAACGCATCTTGCGCTCCTTGGTATTCCGAGGAGCATGCCTGTTTGAGTGTGATT  
AAATTCTCAACTCTCTTCTAC--TTTTTGTAAGAGAGCTTGGACTGTGGAGGCTTGCT  
GGCCACTTTTTGGGGTCAGCTCCTCTGAAATGCATTAGCGGAACCGTTTGCGATCTGCCA  
CAAGTGTGATAAGTTATCTACACTGGCGAGGGGATTGCTCTCTGTAATGTTGAGCTTCTA  
ATTGTCTCTACTTTGTGAGACTACTTTTGAATGCTTGACCTCAAATCAGGTAGGACTACC  
CGCTGAACTTAA

>ABC5-42

TTTCCGTAGGTGAACCTGCGGAAGGATCATTATTGAATTATGTTTCTAGATAGGTTGTAG  
CTGGCTC-TTTAGAGCATGTGCACGCCTGTTTGGACTTCATTTTCATCCACCTGTGCACC  
TATTGTAGTCTTTGGTTGGGTTAGGAGGAAGTGGTCATTGTGTCAGCATCTGCTGGATGT  
GAGGACTTGCATTGTGAAAGCTTTGCTGTCCTTGATGTGATCATGGAATCTCTTTCTCAC  
TAGAGTCTATGTCACTCATTATACTCTGTGCAATGTCATTGAATGTCTTTACATGGGCTT  
ATATGCCTATGAAAATTGTAATAACAACCTTTGAGCAACGGATCTCTTGGCTCTCGCATCGA  
TGAAGAACGCAGCGAAATGCGATAAGTAATGTGAATTGCAGAATTCAGTGAATCATCGAA  
TCTTTGAACGCATCTTGCGCTCCTTGGTATTCCGAGGAGCATGCCTGTTTGAGTGTGATT  
AAATTCTCAACTCTCTTCTAC--TTTTTGTAAGAGAGCTTGGACTGTGGAGGCTTGCT  
GGCCACTTTTTGGGGTCAGCTCCTCTGAAATGCATTAGCGGAACCGTTTGCGATCTGCCA  
CAAGTGTGATAAGTTATCTACACTGGCGAGGGGATTGCTCTCTGTAATGTTGAGCTTCTA  
ATTGTCTCTACTTTGTGAGACTACTTTTGAATGCTTGACCTCAAATCAGGTAGGACTACC  
CGCTGAACTTAA

>ABC5-70

TTTCCGTAGGTGAACCTGCGGAAGGATCATTATTGAATTATGTTTCTAGATAGGTTGTAG  
CTGGCTC-TTTAGAGCATGTGCACGCCTGTTTGGACTTCATTTTCATCCACCTGTGCACC  
TATTGTAGTCTTTGGTTGGGTTAGGAGGAAGTGGTCATTGTGTCAGCATCTGCTGGATGT



GAGGACTTGCATTGTGAAAGCTTTGCTGTCCTTGATGTGATCATGGAATCTCTTTCTCAC  
TAGAGTCTATGTCACCTATTATACTCTGTGCAATGTCATTGAATGTCTTTACATGGGCTT  
ATATGCCTATGAAAATTGTAATACAACCTTTCAGCAACGGATCTCTTGGCTCTCGCATCGA  
TGAAGAACGCAGCGAAATGCGATAAGTAATGTGAATTGCAGAATTCAGTGAATCATCGAA  
TCTTTGAACGCATCTTGCGCTCCTTGGTATTCCGAGGAGCATGCCTGTTTGAGTGTCAAT  
AAATTCTCAACTCTCTTCTAC--TTTTTGAAAAGAGAGCTTGGACTGTGGAGGCTTGCT  
GGCCACTTTTTGGGGTCAGCTCCTCTGAAATGCATTAGCGGAACCGTTTGCGATCTGCCA  
CAAGTGTGATAAGTTATCTACACTGGCGAGGGGATTGCTCTCTGTAATGTTTCACTTCTA  
ATTGTCTCTACTTTGTGAGACTACTTTTGAATGCTTGACCTCAAATCAGGTAGGACTACC  
CGCTGAACTTAA

>ABC5-74

TTTCCGTAGGTGAACCTGCGGAAGGATCATTATTGAATTATGTTTCTAGATAGGTTGTAG  
CTGGCTC-TTTAGAGCATGTGCACGCCTGTTTGGACTTCATTTTCATCCACCTGTGCACC  
TATTGTAGTCTTTGGTTGGGTTAGGAGGAAGTGGTCATTGTGTCAGCATCTGCTGGATGT  
GAGGACTTGCATTGTGAAAGCTTTGCTGTCCTTGATGTGATCATGGAATCTCTTTCTCAC  
TAGAGTCTATGTCACCTATTATACTCTGTGCAATGTCATTGAATGTCTTTACATGGGCTT  
ATATGCCTATGAAAATTGTAATACAACCTTTCAGCAACGGATCTCTTGGCTCTCGCATCGA  
TGAAGAACGCAGCGAAATGCGATAAGTAATGTGAATTGCAGAATTCAGTGAATCATCGAA  
TCTTTGAACGCATCTTGCGCTCCTTGGTATTCCGAGGAGCATGCCTGTTTGAGTGTCAAT  
AAATTCTCAACTCTCTTCTAC--TTTTTGAAAAGAGAGCTTGGACTGTGGAGGCTTGCT  
GGCCACTTTTTGGGGTCAGCTCCTCTGAAATGCATTAGCGGAACCGTTTGCGATCTGCCA  
CAAGTGTGATAAGTTATCTACACTGGCGAGGGGATTGCTCTCTGTAATGTTTCACTTCTA  
ATTGTCTCTACTTTGTGAGACTACTTTTGAATGCTTGACCTCAAATCAGGTAGGACTACC  
CGCTGAACTTAA

>ABC5-80

TTTCCGTAGGTGAACCTGCGGAAGGATCATTATTGAATTATGTTTCTAGATAGGTTGTAG  
CTGGCTC-TTTAGAGCATGTGCACGCCTGTTTGGACTTCATTTTCATCCACCTGTGCACC  
TATTGTAGTCTTTGGTTGGGTTAGGAGGAAGTGGTCATTGTGTCAGCATCTGCTGGATGT  
GAGGACTTGCATTGTGAAAGCTTTGCTGTCCTTGATGTGATCATGGAATCTCTTTCTCAC  
TAGAGTCTATGTCACCTATTATACTCTGTGCAATGTCATTGAATGTCTTTACATGGGCTT  
ATATGCCTATGAAAATTGTAATACAACCTTTCAGCAACGGATCTCTTGGCTCTCGCATCGA  
TGAAGAACGCAGCGAAATGCGATAAGTAATGTGAATTGCAGAATTCAGTGAATCATCGAA  
TCTTTGAACGCATCTTGCGCTCCTTGGTATTCCGAGGAGCATGCCTGTTTGAGTGTCAAT  
AAATTCTCAACTCTCTTCTAC--TTTTTGAAAAGAGAGCTTGGACTGTGGAGGCTTGCT  
GGCCACTTTTTGGGGTCAGCTCCTCTGAAATGCATTAGCGGAACCGTTTGCGATCTGCCA  
CAAGTGTGATAAGTTATCTACACTGGCGAGGGGATTGCTCTCTGTAATGTTTCACTTCTA  
ATTGTCTCTACTTTGTGAGACTACTTTTGAATGCTTGACCTCAAATCAGGTAGGACTACC  
CGCTGAACTTAA

>ABC5-85

TTTCCGTAGGTGAACCTGCGGAAGGATCATTATTGAATTATGTTTCTAGATAGGTTGTAG  
CTGGCTC-TTTAGAGCATGTGCACGCCTGTTTGGACTTCATTTTCATCCACCTGTGCACC  
TATTGTAGTCTTTGGTTGGGTTAGGAGGAAGTGGTCATTGTGTCAGCATCTGCTGGATGT  
GAGGACTTGCATTGTGAAAGCTTTGCTGTCCTTGATGTGATCATGGAATCTCTTTCTCAC  
TAGAGTCTATGTCACCTATTATACTCTGTGCAATGTCATTGAATGTCTTTACATGGGCTT  
ATATGCCTATGAAAATTGTAATACAACCTTTCAGCAACGGATCTCTTGGCTCTCGCATCGA  
TGAAGAACGCAGCGAAATGCGATAAGTAATGTGAATTGCAGAATTCAGTGAATCATCGAA  
TCTTTGAACGCATCTTGCGCTCCTTGGTATTCCGAGGAGCATGCCTGTTTGAGTGTCAAT  
AAATTCTCAACTCTCTTCTAC--TTTTTGAAAAGAGAGCTTGGACTGTGGAGGCTTGCT  
GGCCACTTTTTGGGGTCAGCTCCTCTGAAATGCATTAGCGGAACCGTTTGCGATCTGCCA  
CAAGTGTGATAAGTTATCTACACTGGCGAGGGGATTGCTCTCTGTAATGTTTCACTTCTA



ATTGTCTCTACTTTGTGAGACTACTTTTGAATGCTTGACCTCAAATCAGGTAGGACTACC  
CGCTGAACTTAA

>ABC6-9

TTTCCGTAGGTGAACCTGCGGAAGGATCATTATTGAATTATGTTTCTAGATAGGTTGTAG  
CTGGCTC-TTTAGAGCATGTGCACGCCTGTTTGGACTTCATTTTCATCCACCTGTGCACC  
TATTGTAGTCTTTGGTTGGGTTAGGAGGAAGTGGTCATTGTGTCAGCATCTGCTGGATGT  
GAGGACTTGCATTGTGAAAGCTTTGCTGTCCTTGATGTGATCATGGAATCTCTTTCTCAC  
TAGAGTCTATGTCACTCATTATACTCTGTGCAATGTCATTGAATGTCTTTACATGGGCTT  
ATATGCCTATGAAAATTGTAATAACAACCTTTCAGCAACGGATCTCTTGGCTCTCGCATCGA  
TGAAGAACGCAGCGAAATGCGATAAGTAATGTGAATTGCAGAATTCAGTGAATCATCGAA  
TCTTTGAACGCATCTTGCCTCCTTGGTATTCCGAGGAGCATGCCTGTTTGAGTGTCAAT  
AAATTCTCAACTCTCTTCTAC--TTTTGTAAAAGAGAGCTTGGACTGTGGAGGCTTGCT  
GGCCACTTTTTGGGGTCAGCTCCTCTGAAATGCATTAGCGGAACCGTTTGCGATCTGCCA  
CAAGTGTGATAAGTTATCTACACTGGCGAGGGGATTGCTCTCTGTAATGTTTCAGCTTCTA  
ATTGTCTCTACTTTGTGAGACTACTTTTGAATGCTTGACCTCAAATCAGGTAGGACTACC  
CGCTGAACTTAA

>ABC6-17

TTTCCGTAGGTGAACCTGCGGAAGGATCATTATTGAATTATGTTTCTAGATAGGTTGTAG  
CTGGCTC-TTTAGAGCATGTGCACGCCTGTTTGGACTTCATTTTCATCCACCTGTGCACC  
TATTGTAGTCTTTGGTTGGGTTAGGAGGAAGTGGTCATTGTGTCAGCATCTGCTGGATGT  
GAGGACTTGCATTGTGAAAGCTTTGCTGTCCTTGATGTGATCATGGAATCTCTTTCTCAC  
TAGAGTCTATGTCACTCATTATACTCTGTGCAATGTCATTGAATGTCTTTACATGGGCTT  
ATATGCCTATGAAAATTGTAATAACAACCTTTCAGCAACGGATCTCTTGGCTCTCGCATCGA  
TGAAGAACGCAGCGAAATGCGATAAGTAATGTGAATTGCAGAATTCAGTGAATCATCGAA  
TCTTTGAACGCATCTTGCCTCCTTGGTATTCCGAGGAGCATGCCTGTTTGAGTGTCAAT  
AAATTCTCAACTCTCTTCTAC--TTTTGTAAAAGAGAGCTTGGACTGTGGAGGCTTGCT  
GGCCACTTTTTGGGGTCAGCTCCTCTGAAATGCATTAGCGGAACCGTTTGCGATCTGCCA  
CAAGTGTGATAAGTTATCTACACTGGCGAGGGGATTGCTCTCTGTAATGTTTCAGCTTCTA  
ATTGTCTCTACTTTGTGAGACTACTTTTGAATGCTTGACCTCAAATCAGGTAGGACTACC  
CGCTGAACTTAA

>ABC6-18

TTTCCGTAGGTGAACCTGCGGAAGGATCATTATTGAATTATGTTTCTAGATAGGTTGTAG  
CTGGCTC-TTTAGAGCATGTGCACGCCTGTTTGGACTTCATTTTCATCCACCTGTGCACC  
TATTGTAGTCTTTGGTTGGGTTAGGAGGAAGTGGTCATTGTGTCAGCATCTGCTGGATGT  
GAGGACTTGCATTGTGAAAGCTTTGCTGTCCTTGATGTGATCATGGAATCTCTTTCTCAC  
TAGAGTCTATGTCACTCATTATACTCTGTGCAATGTCATTGAATGTCTTTACATGGGCTT  
ATATGCCTATGAAAATTGTAATAACAACCTTTCAGCAACGGATCTCTTGGCTCTCGCATCGA  
TGAAGAACGCAGCGAAATGCGATAAGTAATGTGAATTGCAGAATTCAGTGAATCATCGAA  
TCTTTGAACGCATCTTGCCTCCTTGGTATTCCGAGGAGCATGCCTGTTTGAGTGTCAAT  
AAATTCTCAACTCTCTTCTAC--TTTTGTAAAAGAGAGCTTGGACTGTGGAGGCTTGCT  
GGCCACTTTTTGGGGTCAGCTCCTCTGAAATGCATTAGCGGAACCGTTTGCGATCTGCCA  
CAAGTGTGATAAGTTATCTACACTGGCGAGGGGATTGCTCTCTGTAATGTTTCAGCTTCTA  
ATTGTCTCTACTTTGTGAGACTACTTTTGAATGCTTGACCTCAAATCAGGTAGGACTACC  
CGCTGAACTTAA

>ABC6-35

TTTCCGTAGGTGAACCTGCGGAAGGATCATTATTGAATTATGTTTCTAGATAGGTTGTAG  
CTGGCTC-TTTAGAGCATGTGCACGCCTGTTTGGACTTCATTTTCATCCACCTGTGCACC  
TATTGTAGTCTTTGGTTGGGTTAGGAGGAAGTGGTCATTGTGTCAGCATCTGCTGGATGT  
GAGGACTTGCATTGTGAAAGCTTTGCTGTCCTTGATGTGATCATGGAATCTCTTTCTCAC  
TAGAGTCTATGTCACTCATTATACTCTGTGCAATGTCATTGAATGTCTTTACATGGGCTT



ATATGCCTATGAAAATTGTAATACAACCTTTTCAGCAACGGATCTCTTGGCTCTCGCATCGA  
TGAAGAACGCAGCGAAATGCGATAAGTAATGTGAATTGCAGAATTCAGTGAATCATCGAA  
TCTTTGAACGCATCTTGCCTCCTTGGTATTCCGAGGAGCATGCCTGTTTGAGTGTCAAT  
AAATTCTCAACTCTCTTCTAC--TTTTTGAAAAGAGAGCTTGGACTGTGGAGGCTTGCT  
GGCCACTTTTTGGGGTCAGCTCCTCTGAAATGCATTAGCGGAACCGTTTGCGATCTGCCA  
CAAGTGTGATAAGTTATCTACACTGGCGAGGGGATTGCTCTCTGTAATGTTTCAGCTTCTA  
ATTGTCTCTACTTTGTGAGACTACTTTTGAATGCTTGACCTCAAATCAGGTAGGACTACC  
CGCTGAACTTAA

>ABC6-47

TTTCCGTAGGTGAACCTGCGGAAGGATCATTATTGAATTATGTTTCTAGATAGGTTGTAG  
CTGGCTC-TTLAGAGCATGTGCACGCCTGTTTGGACTTCATTTTCATCCACCTGTGCACC  
TATTGTAGTCTTTGGTTGGGTTAGGAGGAAGTGGTCATTGTGTCAGCATCTGCTGGATGT  
GAGGACTTGCATTGTGAAAGCTTTGCTGTCCTTGATGTGATCATGGAATCTCTTTCTCAC  
TAGAGTCTATGTCACCTCATTATACTCTGTCTGAATGTCATTGAATGTCTTTACATGGGCTT  
ATATGCCTATGAAAATTGTAATACAACCTTTTCAGCAACGGATCTCTTGGCTCTCGCATCGA  
TGAAGAACGCAGCGAAATGCGATAAGTAATGTGAATTGCAGAATTCAGTGAATCATCGAA  
TCTTTGAACGCATCTTGCCTCCTTGGTATTCCGAGGAGCATGCCTGTTTGAGTGTCAAT  
AAATTCTCAACTCTCTTCTAC--TTTTTGAAAAGAGAGCTTGGACTGTGGAGGCTTGCT  
GGCCACTTTTTGGGGTCAGCTCCTCTGAAATGCATTAGCGGAACCGTTTGCGATCTGCCA  
CAAGTGTGATAAGTTATCTACACTGGCGAGGGGATTGCTCTCTGTAATGTTTCAGCTTCTA  
ATTGTCTCTACTTTGTGAGACTACTTTTGAATGCTTGACCTCAAATCAGGTAGGACTACC  
CGCTGAACTTAA

>ABC6-51

TTTCCGTAGGTGAACCTGCGGAAGGATCATTATTGAATTATGTTTCTAGATAGGTTGTAG  
CTGGCTC-TTLAGAGCATGTGCACGCCTGTTTGGACTTCATTTTCATCCACCTGTGCACC  
TATTGTAGTCTTTGGTTGGGTTAGGAGGAAGTGGTCATTGTGTCAGCATCTGCTGGATGT  
GAGGACTTGCATTGTGAAAGCTTTGCTGTCCTTGATGTGATCATGGAATCTCTTTCTCAC  
TAGAGTCTATGTCACCTCATTATACTCTGTCTGAATGTCATTGAATGTCTTTACATGGGCTT  
ATATGCCTATGAAAATTGTAATACAACCTTTTCAGCAACGGATCTCTTGGCTCTCGCATCGA  
TGAAGAACGCAGCGAAATGCGATAAGTAATGTGAATTGCAGAATTCAGTGAATCATCGAA  
TCTTTGAACGCATCTTGCCTCCTTGGTATTCCGAGGAGCATGCCTGTTTGAGTGTCAAT  
AAATTCTCAACTCTCTTCTAC--TTTTTGAAAAGAGAGCTTGGACTGTGGAGGCTTGCT  
GGCCACTTTTTGGGGTCAGCTCCTCTGAAATGCATTAGCGGAACCGTTTGCGATCTGCCA  
CAAGTGTGATAAGTTATCTACACTGGCGAGGGGATTGCTCTCTGTAATGTTTCAGCTTCTA  
ATTGTCTCTACTTTGTGAGACTACTTTTGAATGCTTGACCTCAAATCAGGTAGGACTACC  
CGCTGAACTTAA

>ABC7-1

TTTCCGTAGGTGAACCTGCGGAAGGATCATTATTGAATTATGTTTCTAGATAGGTTGTAG  
CTGGCTC-TTLAGAGCATGTGCACGCCTGTTTGGACTTCATTTTCATCCACCTGTGCACC  
TATTGTAGTCTTTGGTTGGGTTAGGAGGAAGTGGTCATTGTGTCAGCATCTGCTGGATGT  
GAGGACTTGCATTGTGAAAGCTTTGCTGTCCTTGATGTGATCATGGAATCTCTTTCTCAC  
TAGAGTCTATGTCACCTCATTATACTCTGTCTGAATGTCATTGAATGTCTTTACATGGGCTT  
ATATGCCTATGAAAATTGTAATACAACCTTTTCAGCAACGGATCTCTTGGCTCTCGCATCGA  
TGAAGAACGCAGCGAAATGCGATAAGTAATGTGAATTGCAGAATTCAGTGAATCATCGAA  
TCTTTGAACGCATCTTGCCTCCTTGGTATTCCGAGGAGCATGCCTGTTTGAGTGTCAAT  
AAATTCTCAACTCTCTTCTAC--TTTTTGAAAAGAGAGCTTGGACTGTGGAGGCTTGCT  
GGCCACTTTTTGGGGTCAGCTCCTCTGAAATGCATTAGCGGAACCGTTTGCGATCTGCCA  
CAAGTGTGATAAGTTATCTACACTGGCGAGGGGATTGCTCTCTGTAATGTTTCAGCTTCTA  
ATTGTCTCTACTTTGTGAGACTACTTTTGAATGCTTGACCTCAAATCAGGTAGGACTACC  
CGCTGAACTTAA



>ABC7-3

TTTCCGTAGGTGAACCTGCGGAAGGATCATTATTGAATTATGTTTCTAGATAGGTTGTAG  
CTGGCTC-TTTAGAGCATGTGCACGCCTGTTTGGACTTCATTTTCATCCACCTGTGCACC  
TATTGTAGTCTTTGGTTGGGTTAGGAGGAAGTGGTCATTGTGTCAGCATCTGCTGGATGT  
GAGGACTTGCATTGTGAAAGCTTTGCTGTCCTTGATGTGATCATGGAATCTCTTTCTCAC  
TAGAGTCTATGTCACCTCATTATACTCTGTCTGAATGTCATTGAATGTCTTTACATGGGCTT  
ATATGCCTATGAAAATTGTAATACAACCTTTCAGCAACGGATCTCTTGGCTCTCGCATCGA  
TGAAGAACGCAGCGAAATGCGATAAGTAATGTGAATTGCAGAATTCAGTGAATCATCGAA  
TCTTTGAACGCATCTTGCGCTCCTTGGTATTCCGAGGAGCATGCCTGTTTGAGTGTCTATT  
AAATTCTCAACTCTCTTCTAC--TTTTGTAAAAGAGAGCTTGGACTGTGGAGGCTTGCT  
GGCCACTTTTTGGGGTCAGCTCCTCTGAAATGCATTAGCGGAACCGTTTGCGATCTGCCA  
CAAGTGTGATAAGTTATCTACACTGGCGAGGGGATTGCTCTCTGTAATGTTTCAGCTTCTA  
ATTGTCTCTACTTTGTGAGACTACTTTTGAATGCTTGACCTCAAATCAGGTAGGACTACC  
CGCTGAACTTAA

>ABC7-9

TTTCCGTAGGTGAACCTGCGGAAGGATCATTATTGAATTATGTTTCTAGATAGGTTGTAG  
CTGGCTC-TTTAGAGCATGTGCACGCCTGTTTGGACTTCATTTTCATCCACCTGTGCACC  
TATTGTAGTCTTTGGTTGGGTTAGGAGGAAGTGGTCATTGTGTCAGCATCTGCTGGATGT  
GAGGACTTGCATTGTGAAAGCTTTGCTGTCCTTGATGTGATCATGGAATCTCTTTCTCAC  
TAGAGTCTATGTCACCTCATTATACTCTGTCTGAATGTCATTGAATGTCTTTACATGGGCTT  
ATATGCCTATGAAAATTGTAATACAACCTTTCAGCAACGGATCTCTTGGCTCTCGCATCGA  
TGAAGAACGCAGCGAAATGCGATAAGTAATGTGAATTGCAGAATTCAGTGAATCATCGAA  
TCTTTGAACGCATCTTGCGCTCCTTGGTATTCCGAGGAGCATGCCTGTTTGAGTGTCTATT  
AAATTCTCAACTCTCTTCTAC--TTTTGTAAAAGAGAGCTTGGACTGTGGAGGCTTGCT  
GGCCACTTTTTGGGGTCAGCTCCTCTGAAATGCATTAGCGGAACCGTTTGCGATCTGCCA  
CAAGTGTGATAAGTTATCTACACTGGCGAGGGGATTGCTCTCTGTAATGTTTCAGCTTCTA  
ATTGTCTCTACTTTGTGAGACTACTTTTGAATGCTTGACCTCAAATCAGGTAGGACTACC  
CGCTGAACTTAA

>ABC7-11

TTTCCGTAGGTGAACCTGCGGAAGGATCATTATTGAATTATGTTTCTAGATAGGTTGTAG  
CTGGCTC-TTTAGAGCATGTGCACGCCTGTTTGGACTTCATTTTCATCCACCTGTGCACC  
TATTGTAGTCTTTGGTTGGGTTAGGAGGAAGTGGTCATTGTGTCAGCATCTGCTGGATGT  
GAGGACTTGCATTGTGAAAGCTTTGCTGTCCTTGATGTGATCATGGAATCTCTTTCTCAC  
TAGAGTCTATGTCACCTCATTATACTCTGTCTGAATGTCATTGAATGTCTTTACATGGGCTT  
ATATGCCTATGAAAATTGTAATACAACCTTTCAGCAACGGATCTCTTGGCTCTCGCATCGA  
TGAAGAACGCAGCGAAATGCGATAAGTAATGTGAATTGCAGAATTCAGTGAATCATCGAA  
TCTTTGAACGCATCTTGCGCTCCTTGGTATTCCGAGGAGCATGCCTGTTTGAGTGTCTATT  
AAATTCTCAACTCTCTTCTAC--TTTTGTAAAAGAGAGCTTGGACTGTGGAGGCTTGCT  
GGCCACTTTTTGGGGTCAGCTCCTCTGAAATGCATTAGCGGAACCGTTTGCGATCTGCCA  
CAAGTGTGATAAGTTATCTACACTGGCGAGGGGATTGCTCTCTGTAATGTTTCAGCTTCTA  
ATTGTCTCTACTTTGTGAGACTACTTTTGAATGCTTGACCTCAAATCAGGTAGGACTACC  
CGCTGAACTTAA

>ABC7-14

TTTCCGTAGGTGAACCTGCGGAAGGATCATTATTGAATTATGTTTCTAGATAGGTTGTAG  
CTGGCTC-TTTAGAGCATGTGCACGCCTGTTTGGACTTCATTTTCATCCACCTGTGCACC  
TATTGTAGTCTTTGGTTGGGTTAGGAGGAAGTGGTCATTGTGTCAGCATCTGCTGGATGT  
GAGGACTTGCATTGTGAAAGCTTTGCTGTCCTTGATGTGATCATGGAATCTCTTTCTCAC  
TAGAGTCTATGTCACCTCATTATACTCTGTCTGAATGTCATTGAATGTCTTTACATGGGCTT  
ATATGCCTATGAAAATTGTAATACAACCTTTCAGCAACGGATCTCTTGGCTCTCGCATCGA  
TGAAGAACGCAGCGAAATGCGATAAGTAATGTGAATTGCAGAATTCAGTGAATCATCGAA



TCTTTGAACGCATCTTGCGCTCCTTGGTATTCCGAGGAGCATGCCTGTTTGAGTGTCAATT  
AAATTCTCAACTCTCTTCTAC--TTTTTGAAAAGAGAGCTTGGACTGTGGAGGCTTGCT  
GGCCACTTTTTGGGGTCAGCTCCTCTGAAATGCATTAGCGGAACCGTTTGCGATCTGCCA  
CAAGTGTGATAAGTTATCTACACTGGCGAGGGGATTGCTCTCTGTAATGTTTCAGCTTCTA  
ATTGTCTCTACTTTGTGAGACTACTTTTGAATGCTTGACCTCAAATCAGGTAGGACTACC  
CGCTGAACTTAA

>ABC8-7

TTTCCGTAGGTGAACCTGCGGAAGGATCATTATTGAATTATGTTTCTAGATAGGTTGTAG  
CTGGCTC-TTTAGAGCATGTGCACGCCTGTTTGGACTTCATTTTCATCCACCTGTGCACC  
TATTGTAGTCTTTGGTTGGGTTAGGAGGAAGTGGTCATTGTGTCAGCATCTGCTGGATGT  
GAGGACTTGCAATTGTGAAAGCTTTGCTGTCCTTGATGTGATCATGGAATCTCTTTCTCAC  
TAGAGTCTATGTCACCTCATTATACTCTGTGCAATGTCATTGAATGTCTTTACATGGGCTT  
ATATGCCTATGAAAATTGTAATACAACCTTTAGCAACGGATCTCTTGGCTCTCGCATCGA  
TGAAGAACGCAGCGAAATGCGATAAGTAATGTGAATTGCAGAATTCAGTGAATCATCGAA  
TCTTTGAACGCATCTTGCGCTCCTTGGTATTCCGAGGAGCATGCCTGTTTGAGTGTCAATT  
AAATTCTCAACTCTCTTCTAC--TTTTTGAAAAGAGAGCTTGGACTGTGGAGGCTTGCT  
GGCCACTTTTTGGGGTCAGCTCCTCTGAAATGCATTAGCGGAACCGTTTGCGATCTGCCA  
CAAGTGTGATAAGTTATCTACACTGGCGAGGGGATTGCTCTCTGTAATGTTTCAGCTTCTA  
ATTGTCTCTACTTTGTGAGACTACTTTTGAATGCTTGACCTCAAATCAGGTAGGACTACC  
CGCTGAACTTAA

>ABC8-27

TTTCCGTAGGTGAACCTGCGGAAGGATCATTATTGAATTATGTTTCTAGATAGGTTGTAG  
CTGGCTC-TTTAGAGCATGTGCACGCCTGTTTGGACTTCATTTTCATCCACCTGTGCACC  
TATTGTAGTCTTTGGTTGGGTTAGGAGGAAGTGGTCATTGTGTCAGCATCTGCTGGATGT  
GAGGACTTGCAATTGTGAAAGCTTTGCTGTCCTTGATGTGATCATGGAATCTCTTTCTCAC  
TAGAGTCTATGTCACCTCATTATACTCTGTGCAATGTCATTGAATGTCTTTACATGGGCTT  
ATATGCCTATGAAAATTGTAATACAACCTTTAGCAACGGATCTCTTGGCTCTCGCATCGA  
TGAAGAACGCAGCGAAATGCGATAAGTAATGTGAATTGCAGAATTCAGTGAATCATCGAA  
TCTTTGAACGCATCTTGCGCTCCTTGGTATTCCGAGGAGCATGCCTGTTTGAGTGTCAATT  
AAATTCTCAACTCTCTTCTAC--TTTTTGAAAAGAGAGCTTGGACTGTGGAGGCTTGCT  
GGCCACTTTTTGGGGTCAGCTCCTCTGAAATGCATTAGCGGAACCGTTTGCGATCTGCCA  
CAAGTGTGATAAGTTATCTACACTGGCGAGGGGATTGCTCTCTGTAATGTTTCAGCTTCTA  
ATTGTCTCTACTTTGTGAGACTACTTTTGAATGCTTGACCTCAAATCAGGTAGGACTACC  
CGCTGAACTTAA

>ABC8-42

TTTCCGTAGGTGAACCTGCGGAAGGATCATTATTGAATTATGTTTCTAGATAGGTTGTAG  
CTGGCTC-TTTAGAGCATGTGCACGCCTGTTTGGACTTCATTTTCATCCACCTGTGCACC  
TATTGTAGTCTTTGGTTGGGTTAGGAGGAAGTGGTCATTGTGTCAGCATCTGCTGGATGT  
GAGGACTTGCAATTGTGAAAGCTTTGCTGTCCTTGATGTGATCATGGAATCTCTTTCTCAC  
TAGAGTCTATGTCACCTCATTATACTCTGTGCAATGTCATTGAATGTCTTTACATGGGCTT  
ATATGCCTATGAAAATTGTAATACAACCTTTAGCAACGGATCTCTTGGCTCTCGCATCGA  
TGAAGAACGCAGCGAAATGCGATAAGTAATGTGAATTGCAGAATTCAGTGAATCATCGAA  
TCTTTGAACGCATCTTGCGCTCCTTGGTATTCCGAGGAGCATGCCTGTTTGAGTGTCAATT  
AAATTCTCAACTCTCTTCTAC--TTTTTGAAAAGAGAGCTTGGACTGTGGAGGCTTGCT  
GGCCACTTTTTGGGGTCAGCTCCTCTGAAATGCATTAGCGGAACCGTTTGCGATCTGCCA  
CAAGTGTGATAAGTTATCTACACTGGCGAGGGGATTGCTCTCTGTAATGTTTCAGCTTCTA  
ATTGTCTCTACTTTGTGAGACTACTTTTGAATGCTTGACCTCAAATCAGGTAGGACTACC  
CGCTGAACTTAA

>ABC9-5

TTTCCGTAGGTGAACCTGCGGAAGGATCATTATTGAATTATGTTTCTAGATAGGTTGTAG



CTGGCTC-TTTAGAGCATGTGCACGCCTGTTTGGACTTCATTTTCATCCACCTGTGCACC  
TATTGTAGTCTTTGGTTGGGTTAGGAGGAAGTGGTCATTGTGTCAGCATCTGCTGGATGT  
GAGGACTTGCATTGTGAAAGCTTTGCTGTCCTTGATGTGATCATGGAATCTCTTTCTCAC  
TAGAGTCTATGTCACCTCATTATACTCTGTGCAATGTCATTGAATGTCTTTACATGGGCTT  
ATATGCCTATGAAAATTGTAATACAACCTTTCAGCAACGGATCTCTTGGCTCTCGCATCGA  
TGAAGAACGCAGCGAAATGCGATAAGTAATGTGAATTGCAGAATTCAGTGAATCATCGAA  
TCTTTGAACGCATCTTGCCTCCTTGGTATTCCGAGGAGCATGCCTGTTTGAGTGTCAAT  
AAATTCTCAACTCTCTTCTAC--TTTTTGTAAGAGAGCTTGGACTGTGGAGGCTTGCT  
GGCCACTTTTTGGGGTCAGCTCCTCTGAAATGCATTAGCGGAACCGTTTGCGATCTGCCA  
CAAGTGTGATAAGTTATCTACACTGGCGAGGGGATTGCTCTCTGTAATGTTGAGCTTCTA  
ATTGTCTCTACTTTGTGAGACTACTTTTGAATGCTTGACCTCAAATCAGGTAGGACTACC  
CGCTGAACTTAA

>ABC9-9

TTTCCGTAGGTGAACCTGCGGAAGGATCATTATTGAATTATGTTTCTAGATAGGTTGTAG  
CTGGCTC-TTTAGAGCATGTGCACGCCTGTTTGGACTTCATTTTCATCCACCTGTGCACC  
TATTGTAGTCTTTGGTTGGGTTAGGAGGAAGTGGTCATTGTGTCAGCATCTGCTGGATGT  
GAGGACTTGCATTGTGAAAGCTTTGCTGTCCTTGATGTGATCATGGAATCTCTTTCTCAC  
TAGAGTCTATGTCACCTCATTATACTCTGTGCAATGTCATTGAATGTCTTTACATGGGCTT  
ATATGCCTATGAAAATTGTAATACAACCTTTCAGCAACGGATCTCTTGGCTCTCGCATCGA  
TGAAGAACGCAGCGAAATGCGATAAGTAATGTGAATTGCAGAATTCAGTGAATCATCGAA  
TCTTTGAACGCATCTTGCCTCCTTGGTATTCCGAGGAGCATGCCTGTTTGAGTGTCAAT  
AAATTCTCAACTCTCTTCTAC--TTTTTGTAAGAGAGCTTGGACTGTGGAGGCTTGCT  
GGCCACTTTTTGGGGTCAGCTCCTCTGAAATGCATTAGCGGAACCGTTTGCGATCTGCCA  
CAAGTGTGATAAGTTATCTACACTGGCGAGGGGATTGCTCTCTGTAATGTTGAGCTTCTA  
ATTGTCTCTACTTTGTGAGACTACTTTTGAATGCTTGACCTCAAATCAGGTAGGACTACC  
CGCTGAACTTAA

>ABC9-34

TTTCCGTAGGTGAACCTGCGGAAGGATCATTATTGAATTATGTTTCTAGATAGGTTGTAG  
CTGGCTC-TTTAGAGCATGTGCACGCCTGTTTGGACTTCATTTTCATCCACCTGTGCACC  
TATTGTAGTCTTTGGTTGGGTTAGGAGGAAGTGGTCATTGTGTCAGCATCTGCTGGATGT  
GAGGACTTGCATTGTGAAAGCTTTGCTGTCCTTGATGTGATCATGGAATCTCTTTCTCAC  
TAGAGTCTATGTCACCTCATTATACTCTGTGCAATGTCATTGAATGTCTTTACATGGGCTT  
ATATGCCTATGAAAATTGTAATACAACCTTTCAGCAACGGATCTCTTGGCTCTCGCATCGA  
TGAAGAACGCAGCGAAATGCGATAAGTAATGTGAATTGCAGAATTCAGTGAATCATCGAA  
TCTTTGAACGCATCTTGCCTCCTTGGTATTCCGAGGAGCATGCCTGTTTGAGTGTCAAT  
AAATTCTCAACTCTCTTCTAC--TTTTTGTAAGAGAGCTTGGACTGTGGAGGCTTGCT  
GGCCACTTTTTGGGGTCAGCTCCTCTGAAATGCATTAGCGGAACCGTTTGCGATCTGCCA  
CAAGTGTGATAAGTTATCTACACTGGCGAGGGGATTGCTCTCTGTAATGTTGAGCTTCTA  
ATTGTCTCTACTTTGTGAGACTACTTTTGAATGCTTGACCTCAAATCAGGTAGGACTACC  
CGCTGAACTTAA

>ABC9-58

TTTCCGTAGGTGAACCTGCGGAAGGATCATTATTGAATTATGTTTCTAGATAGGTTGTAG  
CTGGCTC-TTTAGAGCATGTGCACGCCTGTTTGGACTTCATTTTCATCCACCTGTGCACC  
TATTGTAGTCTTTGGTTGGGTTAGGAGGAAGTGGTCATTGTGTCAGCATCTGCTGGATGT  
GAGGACTTGCATTGTGAAAGCTTTGCTGTCCTTGATGTGATCATGGAATCTCTTTCTCAC  
TAGAGTCTATGTCACCTCATTATACTCTGTGCAATGTCATTGAATGTCTTTACATGGGCTT  
ATATGCCTATGAAAATTGTAATACAACCTTTCAGCAACGGATCTCTTGGCTCTCGCATCGA  
TGAAGAACGCAGCGAAATGCGATAAGTAATGTGAATTGCAGAATTCAGTGAATCATCGAA  
TCTTTGAACGCATCTTGCCTCCTTGGTATTCCGAGGAGCATGCCTGTTTGAGTGTCAAT  
AAATTCTCAACTCTCTTCTAC--TTTTTGTAAGAGAGCTTGGACTGTGGAGGCTTGCT



GGCCACTTTTTGGGGTCAGCTCCTCTGAAATGCATTAGCGGAACCGTTTGCGATCTGCCA  
CAAGTGTGATAAGTTATCTACACTGGCGAGGGGATTGCTCTCTGTAATGTTGAGCTTCTA  
ATTGTCTCTACTTTGTGAGACTACTTTTGAATGCTTGACCTCAAATCAGGTAGGACTACC  
CGCTGAACTTAA

>ABC10-1

TTTCCGTAGGTGAACCTGCGGAAGGATCATTATTGAATTATGTTTCTAGATAGGTTGTAG  
CTGGCTC-TTTAGAGCATGTGCACGCCTGTTTGGACTTCATTTTCATCCACCTGTGCACC  
TATTGTAGTCTTTGGTTGGGTTAGGAGGAAGTGGTCATTGTGTCAGCATCTGCTGGATGT  
GAGGACTTGCATTGTGAAAGCTTTGCTGTCCTTGATGTGATCATGGAATCTCTTTCTCAC  
TAGAGTCTATGTCACTCATTATACTCTGTGCAATGTCATTGAATGTCTTTACATGGGCTT  
ATATGCCTATGAAAATTGTAATAACAACCTTTCAGCAACGGATCTCTTGGCTCTCGCATCGA  
TGAAGAACGCAGCGAAATGCGATAAGTAATGTGAATTGCAGAATTCAGTGAATCATCGAA  
TCTTTGAACGCATCTTGCGCTCCTTGGTATTCCGAGGAGCATGCCTGTTTGAGTGTGATT  
AAATTCTCAACTCTCTTCTAC--TTTTTGTAAGAGAGCTTGGACTGTGGAGGCTTGCT  
GGCCACTTTTTGGGGTCAGCTCCTCTGAAATGCATTAGCGGAACCGTTTGCGATCTGCCA  
CAAGTGTGATAAGTTATCTACACTGGCGAGGGGATTGCTCTCTGTAATGTTGAGCTTCTA  
ATTGTCTCTACTTTGTGAGACTACTTTTGAATGCTTGACCTCAAATCAGGTAGGACTACC  
CGCTGAACTTAA

>ABC10-9

TTTCCGTAGGTGAACCTGCGGAAGGATCATTATTGAATTATGTTTCTAGATAGGTTGTAG  
CTGGCTC-TTTAGAGCATGTGCACGCCTGTTTGGACTTCATTTTCATCCACCTGTGCACC  
TATTGTAGTCTTTGGTTGGGTTAGGAGGAAGTGGTCATTGTGTCAGCATCTGCTGGATGT  
GAGGACTTGCATTGTGAAAGCTTTGCTGTCCTTGATGTGATCATGGAATCTCTTTCTCAC  
TAGAGTCTATGTCACTCATTATACTCTGTGCAATGTCATTGAATGTCTTTACATGGGCTT  
ATATGCCTATGAAAATTGTAATAACAACCTTTCAGCAACGGATCTCTTGGCTCTCGCATCGA  
TGAAGAACGCAGCGAAATGCGATAAGTAATGTGAATTGCAGAATTCAGTGAATCATCGAA  
TCTTTGAACGCATCTTGCGCTCCTTGGTATTCCGAGGAGCATGCCTGTTTGAGTGTGATT  
AAATTCTCAACTCTCTTCTAC--TTTTTGTAAGAGAGCTTGGACTGTGGAGGCTTGCT  
GGCCACTTTTTGGGGTCAGCTCCTCTGAAATGCATTAGCGGAACCGTTTGCGATCTGCCA  
CAAGTGTGATAAGTTATCTACACTGGCGAGGGGATTGCTCTCTGTAATGTTGAGCTTCTA  
ATTGTCTCTACTTTGTGAGACTACTTTTGAATGCTTGACCTCAAATCAGGTAGGACTACC  
CGCTGAACTTAA

>ABC10-16

TTTCCGTAGGTGAACCTGCGGAAGGATCATTATTGAATTATGTTTCTAGATAGGTTGTAG  
CTGGCTC-TTTAGAGCATGTGCACGCCTGTTTGGACTTCATTTTCATCCACCTGTGCACC  
TATTGTAGTCTTTGGTTGGGTTAGGAGGAAGTGGTCATTGTGTCAGCATCTGCTGGATGT  
GAGGACTTGCATTGTGAAAGCTTTGCTGTCCTTGATGTGATCATGGAATCTCTTTCTCAC  
TAGAGTCTATGTCACTCATTATACTCTGTGCAATGTCATTGAATGTCTTTACATGGGCTT  
ATATGCCTATGAAAATTGTAATAACAACCTTTCAGCAACGGATCTCTTGGCTCTCGCATCGA  
TGAAGAACGCAGCGAAATGCGATAAGTAATGTGAATTGCAGAATTCAGTGAATCATCGAA  
TCTTTGAACGCATCTTGCGCTCCTTGGTATTCCGAGGAGCATGCCTGTTTGAGTGTGATT  
AAATTCTCAACTCTCTTCTAC--TTTTTGTAAGAGAGCTTGGACTGTGGAGGCTTGCT  
GGCCACTTTTTGGGGTCAGCTCCTCTGAAATGCATTAGCGGAACCGTTTGCGATCTGCCA  
CAAGTGTGATAAGTTATCTACACTGGCGAGGGGATTGCTCTCTGTAATGTTGAGCTTCTA  
ATTGTCTCTACTTTGTGAGACTACTTTTGAATGCTTGACCTCAAATCAGGTAGGACTACC  
CGCTGAACTTAA

>ABC10-21

TTTCCGTAGGTGAACCTGCGGAAGGATCATTATTGAATTATGTTTCTAGATAGGTTGTAG  
CTGGCTC-TTTAGAGCATGTGCACGCCTGTTTGGACTTCATTTTCATCCACCTGTGCACC  
TATTGTAGTCTTTGGTTGGGTTAGGAGGAAGTGGTCATTGTGTCAGCATCTGCTGGATGT



GAGGACTTGCATTGTGAAAGCTTTGCTGTCCTTGATGTGATCATGGAATCTCTTTCTCAC  
TAGAGTCTATGTCACCTATTATACTCTGTGCAATGTCATTGAATGTCTTTACATGGGCTT  
ATATGCCTATGAAAATTGTAATACAACCTTTCAGCAACGGATCTCTTGGCTCTCGCATCGA  
TGAAGAACGCAGCGAAATGCGATAAGTAATGTGAATTGCAGAATTCAGTGAATCATCGAA  
TCTTTGAACGCATCTTGCGCTCCTTGGTATTCCGAGGAGCATGCCTGTTTGAGTGTCAAT  
AAATTCTCAACTCTCTTCTAC--TTTTTGAAAAGAGAGCTTGGACTGTGGAGGCTTGCT  
GGCCACTTTTTGGGGTCAGCTCCTCTGAAATGCATTAGCGGAACCGTTTGCGATCTGCCA  
CAAGTGTGATAAGTTATCTACACTGGCGAGGGGATTGCTCTCTGTAATGTTTCACTTCTA  
ATTGTCTCTACTTTGTGAGACTACTTTTGAATGCTTGACCTCAAATCAGGTAGGACTACC  
CGCTGAACTTAA

>ABC10-31

TTTCCGTAGGTGAACCTGCGGAAGGATCATTATTGAATTATGTTTCTAGATAGGTTGTAG  
CTGGCTC-TTLAGAGCATGTGCACGCCTGTTTGGACTTCATTTTCATCCACCTGTGCACC  
TATTGTAGTCTTTGGTTGGGTTAGGAGGAAGTGGTCATTGTGTCAGCATCTGCTGGATGT  
GAGGACTTGCATTGTGAAAGCTTTGCTGTCCTTGATGTGATCATGGAATCTCTTTCTCAC  
TAGAGTCTATGTCACCTATTATACTCTGTGCAATGTCATTGAATGTCTTTACATGGGCTT  
ATATGCCTATGAAAATTGTAATACAACCTTTCAGCAACGGATCTCTTGGCTCTCGCATCGA  
TGAAGAACGCAGCGAAATGCGATAAGTAATGTGAATTGCAGAATTCAGTGAATCATCGAA  
TCTTTGAACGCATCTTGCGCTCCTTGGTATTCCGAGGAGCATGCCTGTTTGAGTGTCAAT  
AAATTCTCAACTCTCTTCTAC--TTTTTGAAAAGAGAGCTTGGACTGTGGAGGCTTGCT  
GGCCACTTTTTGGGGTCAGCTCCTCTGAAATGCATTAGCGGAACCGTTTGCGATCTGCCA  
CAAGTGTGATAAGTTATCTACACTGGCGAGGGGATTGCTCTCTGTAATGTTTCACTTCTA  
ATTGTCTCTACTTTGTGAGACTACTTTTGAATGCTTGACCTCAAATCAGGTAGGACTACC  
CGCTGAACTTAA

>ABC10-32

TTTCCGTAGGTGAACCTGCGGAAGGATCATTATTGAATTATGTTTCTAGATAGGTTGTAG  
CTGGCTC-TTLAGAGCATGTGCACGCCTGTTTGGACTTCATTTTCATCCACCTGTGCACC  
TATTGTAGTCTTTGGTTGGGTTAGGAGGAAGTGGTCATTGTGTCAGCATCTGCTGGATGT  
GAGGACTTGCATTGTGAAAGCTTTGCTGTCCTTGATGTGATCATGGAATCTCTTTCTCAC  
TAGAGTCTATGTCACCTATTATACTCTGTGCAATGTCATTGAATGTCTTTACATGGGCTT  
ATATGCCTATGAAAATTGTAATACAACCTTTCAGCAACGGATCTCTTGGCTCTCGCATCGA  
TGAAGAACGCAGCGAAATGCGATAAGTAATGTGAATTGCAGAATTCAGTGAATCATCGAA  
TCTTTGAACGCATCTTGCGCTCCTTGGTATTCCGAGGAGCATGCCTGTTTGAGTGTCAAT  
AAATTCTCAACTCTCTTCTAC--TTTTTGAAAAGAGAGCTTGGACTGTGGAGGCTTGCT  
GGCCACTTTTTGGGGTCAGCTCCTCTGAAATGCATTAGCGGAACCGTTTGCGATCTGCCA  
CAAGTGTGATAAGTTATCTACACTGGCGAGGGGATTGCTCTCTGTAATGTTTCACTTCTA  
ATTGTCTCTACTTTGTGAGACTACTTTTGAATGCTTGACCTCAAATCAGGTAGGACTACC  
CGCTGAACTTAA

>ABC10-33

TTTCCGTAGGTGAACCTGCGGAAGGATCATTATTGAATTATGTTTCTAGATAGGTTGTAG  
CTGGCTC-TTLAGAGCATGTGCACGCCTGTTTGGACTTCATTTTCATCCACCTGTGCACC  
TATTGTAGTCTTTGGTTGGGTTAGGAGGAAGTGGTCATTGTGTCAGCATCTGCTGGATGT  
GAGGACTTGCATTGTGAAAGCTTTGCTGTCCTTGATGTGATCATGGAATCTCTTTCTCAC  
TAGAGTCTATGTCACCTATTATACTCTGTGCAATGTCATTGAATGTCTTTACATGGGCTT  
ATATGCCTATGAAAATTGTAATACAACCTTTCAGCAACGGATCTCTTGGCTCTCGCATCGA  
TGAAGAACGCAGCGAAATGCGATAAGTAATGTGAATTGCAGAATTCAGTGAATCATCGAA  
TCTTTGAACGCATCTTGCGCTCCTTGGTATTCCGAGGAGCATGCCTGTTTGAGTGTCAAT  
AAATTCTCAACTCTCTTCTAC--TTTTTGAAAAGAGAGCTTGGACTGTGGAGGCTTGCT  
GGCCACTTTTTGGGGTCAGCTCCTCTGAAATGCATTAGCGGAACCGTTTGCGATCTGCCA  
CAAGTGTGATAAGTTATCTACACTGGCGAGGGGATTGCTCTCTGTAATGTTTCACTTCTA



ATTGTCTCTACTTTGTGAGACTACTTTTGAATGCTTGACCTCAAATCAGGTAGGACTACC  
CGCTGAACTTAA

>ABC10-34

TTTCCGTAGGTGAACCTGCGGAAGGATCATTATTGAATTATGTTTCTAGATAGGTTGTAG  
CTGGCTC-TTTAGAGCATGTGCACGCCTGTTTGGACTTCATTTTCATCCACCTGTGCACC  
TATTGTAGTCTTTGGTTGGGTTAGGAGGAAGTGGTCATTGTGTCAGCATCTGCTGGATGT  
GAGGACTTGCATTGTGAAAGCTTTGCTGTCCTTGATGTGATCATGGAATCTCTTTCTCAC  
TAGAGTCTATGTCACCTATTATACTCTGTGCAATGTCATTGAATGTCTTTACATGGGCTT  
ATATGCCTATGAAAATTGTAATAACAACCTTTCAGCAACGGATCTCTTGGCTCTCGCATCGA  
TGAAGAACGCAGCGAAATGCGATAAGTAATGTGAATTGCAGAATTCAGTGAATCATCGAA  
TCTTTGAACGCATCTTGCCTCCTTGGTATTCCGAGGAGCATGCCTGTTTGAGTGTCAAT  
AAATTCTCAACTCTCTTCTAC--TTTTGTAAAAGAGAGCTTGGACTGTGGAGGCTTGCT  
GGCCACTTTTTGGGGTCAGCTCCTCTGAAATGCATTAGCGGAACCGTTTGCGATCTGCCA  
CAAGTGTGATAAGTTATCTACACTGGCGAGGGGATTGCTCTCTGTAATGTTTCAGCTTCTA  
ATTGTCTCTACTTTGTGAGACTACTTTTGAATGCTTGACCTCAAATCAGGTAGGACTACC  
CGCTGAACTTAA

>ABC10-35

TTTCCGTAGGTGAACCTGCGGAAGGATCATTATTGAATTATGTTTCTAGATAGGTTGTAG  
CTGGCTC-TTTAGAGCATGTGCACGCCTGTTTGGACTTCATTTTCATCCACCTGTGCACC  
TATTGTAGTCTTTGGTTGGGTTAGGAGGAAGTGGTCATTGTGTCAGCATCTGCTGGATGT  
GAGGACTTGCATTGTGAAAGCTTTGCTGTCCTTGATGTGATCATGGAATCTCTTTCTCAC  
TAGAGTCTATGTCACCTATTATACTCTGTGCAATGTCATTGAATGTCTTTACATGGGCTT  
ATATGCCTATGAAAATTGTAATAACAACCTTTCAGCAACGGATCTCTTGGCTCTCGCATCGA  
TGAAGAACGCAGCGAAATGCGATAAGTAATGTGAATTGCAGAATTCAGTGAATCATCGAA  
TCTTTGAACGCATCTTGCCTCCTTGGTATTCCGAGGAGCATGCCTGTTTGAGTGTCAAT  
AAATTCTCAACTCTCTTCTAC--TTTTGTAAAAGAGAGCTTGGACTGTGGAGGCTTGCT  
GGCCACTTTTTGGGGTCAGCTCCTCTGAAATGCATTAGCGGAACCGTTTGCGATCTGCCA  
CAAGTGTGATAAGTTATCTACACTGGCGAGGGGATTGCTCTCTGTAATGTTTCAGCTTCTA  
ATTGTCTCTACTTTGTGAGACTACTTTTGAATGCTTGACCTCAAATCAGGTAGGACTACC  
CGCTGAACTTAA

>ABC10-40

TTTCCGTAGGTGAACCTGCGGAAGGATCATTATTGAATTATGTTTCTAGATAGGTTGTAG  
CTGGCTC-TTTAGAGCATGTGCACGCCTGTTTGGACTTCATTTTCATCCACCTGTGCACC  
TATTGTAGTCTTTGGTTGGGTTAGGAGGAAGTGGTCATTGTGTCAGCATCTGCTGGATGT  
GAGGACTTGCATTGTGAAAGCTTTGCTGTCCTTGATGTGATCATGGAATCTCTTTCTCAC  
TAGAGTCTATGTCACCTATTATACTCTGTGCAATGTCATTGAATGTCTTTACATGGGCTT  
ATATGCCTATGAAAATTGTAATAACAACCTTTCAGCAACGGATCTCTTGGCTCTCGCATCGA  
TGAAGAACGCAGCGAAATGCGATAAGTAATGTGAATTGCAGAATTCAGTGAATCATCGAA  
TCTTTGAACGCATCTTGCCTCCTTGGTATTCCGAGGAGCATGCCTGTTTGAGTGTCAAT  
AAATTCTCAACTCTCTTCTAC--TTTTGTAAAAGAGAGCTTGGACTGTGGAGGCTTGCT  
GGCCACTTTTTGGGGTCAGCTCCTCTGAAATGCATTAGCGGAACCGTTTGCGATCTGCCA  
CAAGTGTGATAAGTTATCTACACTGGCGAGGGGATTGCTCTCTGTAATGTTTCAGCTTCTA  
ATTGTCTCTACTTTGTGAGACTACTTTTGAATGCTTGACCTCAAATCAGGTAGGACTACC  
CGCTGAACTTAA

>ABC10-45

TTTCCGTAGGTGAACCTGCGGAAGGATCATTATTGAATTATGTTTCTAGATAGGTTGTAG  
CTGGCTC-TTTAGAGCATGTGCACGCCTGTTTGGACTTCATTTTCATCCACCTGTGCACC  
TATTGTAGTCTTTGGTTGGGTTAGGAGGAAGTGGTCATTGTGTCAGCATCTGCTGGATGT  
GAGGACTTGCATTGTGAAAGCTTTGCTGTCCTTGATGTGATCATGGAATCTCTTTCTCAC  
TAGAGTCTATGTCACCTATTATACTCTGTGCAATGTCATTGAATGTCTTTACATGGGCTT



ATATGCCTATGAAAATTGTAATACAACCTTTTCAGCAACGGATCTCTTGGCTCTCGCATCGA  
TGAAGAACGCAGCGAAATGCGATAAGTAATGTGAATTGCAGAATTCAGTGAATCATCGAA  
TCTTTGAACGCATCTTGCCTCCTTGGTATTCCGAGGAGCATGCCTGTTTGAGTGTCAAT  
AAATTCTCAACTCTCTTCTAC--TTTTTGAAAAGAGAGCTTGGACTGTGGAGGCTTGCT  
GGCCACTTTTTGGGGTCAGCTCCTCTGAAATGCATTAGCGGAACCGTTTGCGATCTGCCA  
CAAGTGTGATAAGTTATCTACACTGGCGAGGGGATTGCTCTCTGTAATGTTTCAGCTTCTA  
ATTGTCTCTACTTTGTGAGACTACTTTTGAATGCTTGACCTCAAATCAGGTAGGACTACC  
CGCTGAACTTAA

>ABC10-48

TTTCCGTAGGTGAACCTGCGGAAGGATCATTATTGAATTATGTTTCTAGATAGGTTGTAG  
CTGGCTC-TTLAGAGCATGTGCACGCCTGTTTGGACTTCATTTTCATCCACCTGTGCACC  
TATTGTAGTCTTTGGTTGGGTTAGGAGGAAGTGGTCATTGTGTCAGCATCTGCTGGATGT  
GAGGACTTGCATTGTGAAAGCTTTGCTGTCCTTGATGTGATCATGGAATCTCTTTCTCAC  
TAGAGTCTATGTCACCTCATTATACTCTGTCTGAATGTCATTGAATGTCTTTACATGGGCTT  
ATATGCCTATGAAAATTGTAATACAACCTTTTCAGCAACGGATCTCTTGGCTCTCGCATCGA  
TGAAGAACGCAGCGAAATGCGATAAGTAATGTGAATTGCAGAATTCAGTGAATCATCGAA  
TCTTTGAACGCATCTTGCCTCCTTGGTATTCCGAGGAGCATGCCTGTTTGAGTGTCAAT  
AAATTCTCAACTCTCTTCTAC--TTTTTGAAAAGAGAGCTTGGACTGTGGAGGCTTGCT  
GGCCACTTTTTGGGGTCAGCTCCTCTGAAATGCATTAGCGGAACCGTTTGCGATCTGCCA  
CAAGTGTGATAAGTTATCTACACTGGCGAGGGGATTGCTCTCTGTAATGTTTCAGCTTCTA  
ATTGTCTCTACTTTGTGAGACTACTTTTGAATGCTTGACCTCAAATCAGGTAGGACTACC  
CGCTGAACTTAA

>ABC11-8

TTTCCGTAGGTGAACCTGCGGAAGGATCATTATTGAATTATGTTTCTAGATAGGTTGTAG  
CTGGCTC-TTLAGAGCATGTGCACGCCTGTTTGGACTTCATTTTCATCCACCTGTGCACC  
TATTGTAGTCTTTGGTTGGGTTAGGAGGAAGTGGTCATTGTGTCAGCATCTGCTGGATGT  
GAGGACTTGCATTGTGAAAGCTTTGCTGTCCTTGATGTGATCATGGAATCTCTTTCTCAC  
TAGAGTCTATGTCACCTCATTATACTCTGTCTGAATGTCATTGAATGTCTTTACATGGGCTT  
ATATGCCTATGAAAATTGTAATACAACCTTTTCAGCAACGGATCTCTTGGCTCTCGCATCGA  
TGAAGAACGCAGCGAAATGCGATAAGTAATGTGAATTGCAGAATTCAGTGAATCATCGAA  
TCTTTGAACGCATCTTGCCTCCTTGGTATTCCGAGGAGCATGCCTGTTTGAGTGTCAAT  
AAATTCTCAACTCTCTTCTAC--TTTTTGAAAAGAGAGCTTGGACTGTGGAGGCTTGCT  
GGCCACTTTTTGGGGTCAGCTCCTCTGAAATGCATTAGCGGAACCGTTTGCGATCTGCCA  
CAAGTGTGATAAGTTATCTACACTGGCGAGGGGATTGCTCTCTGTAATGTTTCAGCTTCTA  
ATTGTCTCTACTTTGTGAGACTACTTTTGAATGCTTGACCTCAAATCAGGTAGGACTACC  
CGCTGAACTTAA

>ABC11-12

TTTCCGTAGGTGAACCTGCGGAAGGATCATTATTGAATTATGTTTCTAGATAGGTTGTAG  
CTGGCTC-TTLAGAGCATGTGCACGCCTGTTTGGACTTCATTTTCATCCACCTGTGCACC  
TATTGTAGTCTTTGGTTGGGTTAGGAGGAAGTGGTCATTGTGTCAGCATCTGCTGGATGT  
GAGGACTTGCATTGTGAAAGCTTTGCTGTCCTTGATGTGATCATGGAATCTCTTTCTCAC  
TAGAGTCTATGTCACCTCATTATACTCTGTCTGAATGTCATTGAATGTCTTTACATGGGCTT  
ATATGCCTATGAAAATTGTAATACAACCTTTTCAGCAACGGATCTCTTGGCTCTCGCATCGA  
TGAAGAACGCAGCGAAATGCGATAAGTAATGTGAATTGCAGAATTCAGTGAATCATCGAA  
TCTTTGAACGCATCTTGCCTCCTTGGTATTCCGAGGAGCATGCCTGTTTGAGTGTCAAT  
AAATTCTCAACTCTCTTCTAC--TTTTTGAAAAGAGAGCTTGGACTGTGGAGGCTTGCT  
GGCCACTTTTTGGGGTCAGCTCCTCTGAAATGCATTAGCGGAACCGTTTGCGATCTGCCA  
CAAGTGTGATAAGTTATCTACACTGGCGAGGGGATTGCTCTCTGTAATGTTTCAGCTTCTA  
ATTGTCTCTACTTTGTGAGACTACTTTTGAATGCTTGACCTCAAATCAGGTAGGACTACC  
CGCTGAACTTAA



>ABC11-19

TTTCCGTAGGTGAACCTGCGGAAGGATCATTATTGAATTATGTTTCTAGATAGGTTGTAG  
CTGGCTC-TTTAGAGCATGTGCACGCCTGTTTGGACTTCATTTTCATCCACCTGTGCACC  
TATTGTAGTCTTTGGTTGGGTTAGGAGGAAGTGGTCATTGTGTCAGCATCTGCTGGATGT  
GAGGACTTGCATTGTGAAAGCTTTGCTGTCCTTGATGTGATCATGGAATCTCTTTCTCAC  
TAGAGTCTATGTCACCTCATTATACTCTGTGCGAATGTCATTGAATGTCTTTACATGGGCTT  
ATATGCCTATGAAAATTGTAATACAACCTTTCAGCAACGGATCTCTTGGCTCTCGCATCGA  
TGAAGAACGCAGCGAAATGCGATAAGTAATGTGAATTGCAGAATTCAGTGAATCATCGAA  
TCTTTGAACGCATCTTGCCTCCTTGGTATTCCGAGGAGCATGCCTGTTTGAGTGTGATT  
AAATTCTCAACTCTCTTCTAC--TTTTGTAAAAGAGAGCTTGGACTGTGGAGGCTTGCT  
GGCCACTTTTTGGGGTCAGCTCCTCTGAAATGCATTAGCGGAACCGTTTGCGATCTGCCA  
CAAGTGTGATAAGTTATCTACACTGGCGAGGGGATTGCTCTCTGTAATGTTTCAGCTTCTA  
ATTGTCTCTACTTTGTGAGACTACTTTTGAATGCTTGACCTCAAATCAGGTAGGACTACC  
CGCTGAACTTAA

>ABC11-20

TTTCCGTAGGTGAACCTGCGGAAGGATCATTATTGAATTATGTTTCTAGATAGGTTGTAG  
CTGGCTC-TTTAGAGCATGTGCACGCCTGTTTGGACTTCATTTTCATCCACCTGTGCACC  
TATTGTAGTCTTTGGTTGGGTTAGGAGGAAGTGGTCATTGTGTCAGCATCTGCTGGATGT  
GAGGACTTGCATTGTGAAAGCTTTGCTGTCCTTGATGTGATCATGGAATCTCTTTCTCAC  
TAGAGTCTATGTCACCTCATTATACTCTGTGCGAATGTCATTGAATGTCTTTACATGGGCTT  
ATATGCCTATGAAAATTGTAATACAACCTTTCAGCAACGGATCTCTTGGCTCTCGCATCGA  
TGAAGAACGCAGCGAAATGCGATAAGTAATGTGAATTGCAGAATTCAGTGAATCATCGAA  
TCTTTGAACGCATCTTGCCTCCTTGGTATTCCGAGGAGCATGCCTGTTTGAGTGTGATT  
AAATTCTCAACTCTCTTCTAC--TTTTGTAAAAGAGAGCTTGGACTGTGGAGGCTTGCT  
GGCCACTTTTTGGGGTCAGCTCCTCTGAAATGCATTAGCGGAACCGTTTGCGATCTGCCA  
CAAGTGTGATAAGTTATCTACACTGGCGAGGGGATTGCTCTCTGTAATGTTTCAGCTTCTA  
ATTGTCTCTACTTTGTGAGACTACTTTTGAATGCTTGACCTCAAATCAGGTAGGACTACC  
CGCTGAACTTAA

>ABC11-24

TTTCCGTAGGTGAACCTGCGGAAGGATCATTATTGAATTATGTTTCTAGATAGGTTGTAG  
CTGGCTC-TTTAGAGCATGTGCACGCCTGTTTGGACTTCATTTTCATCCACCTGTGCACC  
TATTGTAGTCTTTGGTTGGGTTAGGAGGAAGTGGTCATTGTGTCAGCATCTGCTGGATGT  
GAGGACTTGCATTGTGAAAGCTTTGCTGTCCTTGATGTGATCATGGAATCTCTTTCTCAC  
TAGAGTCTATGTCACCTCATTATACTCTGTGCGAATGTCATTGAATGTCTTTACATGGGCTT  
ATATGCCTATGAAAATTGTAATACAACCTTTCAGCAACGGATCTCTTGGCTCTCGCATCGA  
TGAAGAACGCAGCGAAATGCGATAAGTAATGTGAATTGCAGAATTCAGTGAATCATCGAA  
TCTTTGAACGCATCTTGCCTCCTTGGTATTCCGAGGAGCATGCCTGTTTGAGTGTGATT  
AAATTCTCAACTCTCTTCTAC--TTTTGTAAAAGAGAGCTTGGACTGTGGAGGCTTGCT  
GGCCACTTTTTGGGGTCAGCTCCTCTGAAATGCATTAGCGGAACCGTTTGCGATCTGCCA  
CAAGTGTGATAAGTTATCTACACTGGCGAGGGGATTGCTCTCTGTAATGTTTCAGCTTCTA  
ATTGTCTCTACTTTGTGAGACTACTTTTGAATGCTTGACCTCAAATCAGGTAGGACTACC  
CGCTGAACTTAA

>ABC11-39

TTTCCGTAGGTGAACCTGCGGAAGGATCATTATTGAATTATGTTTCTAGATAGGTTGTAG  
CTGGCTC-TTTAGAGCATGTGCACGCCTGTTTGGACTTCATTTTCATCCACCTGTGCACC  
TATTGTAGTCTTTGGTTGGGTTAGGAGGAAGTGGTCATTGTGTCAGCATCTGCTGGATGT  
GAGGACTTGCATTGTGAAAGCTTTGCTGTCCTTGATGTGATCATGGAATCTCTTTCTCAC  
TAGAGTCTATGTCACCTCATTATACTCTGTGCGAATGTCATTGAATGTCTTTACATGGGCTT  
ATATGCCTATGAAAATTGTAATACAACCTTTCAGCAACGGATCTCTTGGCTCTCGCATCGA  
TGAAGAACGCAGCGAAATGCGATAAGTAATGTGAATTGCAGAATTCAGTGAATCATCGAA



TCTTTGAACGCATCTTGCGCTCCTTGGTATTCCGAGGAGCATGCCTGTTTGAGTGTCAATT  
AAATTCTCAACTCTCTTCTAC--TTTTTGAAAAGAGAGCTTGGACTGTGGAGGCTTGCT  
GGCCACTTTTTGGGGTCAGCTCCTCTGAAATGCATTAGCGGAACCGTTTGCGATCTGCCA  
CAAGTGTGATAAGTTATCTACACTGGCGAGGGGATTGCTCTCTGTAATGTTTCAGCTTCTA  
ATTGTCTCTACTTTGTGAGACTACTTTTGAATGCTTGACCTCAAATCAGGTAGGACTACC  
CGCTGAACTTAA

>ABC11-48

TTTCCGTAGGTGAACCTGCGGAAGGATCATTATTGAATTATGTTTCTAGATAGGTTGTAG  
CTGGCTC-TTTAGAGCATGTGCACGCCTGTTTGGACTTCATTTTCATCCACCTGTGCACC  
TATTGTAGTCTTTGGTTGGGTTAGGAGGAAGTGGTCATTGTGTCAGCATCTGCTGGATGT  
GAGGACTTGCAATTGTGAAAGCTTTGCTGTCCTTGATGTGATCATGGAATCTCTTTCTCAC  
TAGAGTCTATGTCACCTCATTATACTCTGTGCAATGTCATTGAATGTCTTTACATGGGCTT  
ATATGCCTATGAAAATTGTAATACAACCTTTAGCAACGGATCTCTTGGCTCTCGCATCGA  
TGAAGAACGCAGCGAAATGCGATAAGTAATGTGAATTGCAGAATTCAGTGAATCATCGAA  
TCTTTGAACGCATCTTGCGCTCCTTGGTATTCCGAGGAGCATGCCTGTTTGAGTGTCAATT  
AAATTCTCAACTCTCTTCTAC--TTTTTGAAAAGAGAGCTTGGACTGTGGAGGCTTGCT  
GGCCACTTTTTGGGGTCAGCTCCTCTGAAATGCATTAGCGGAACCGTTTGCGATCTGCCA  
CAAGTGTGATAAGTTATCTACACTGGCGAGGGGATTGCTCTCTGTAATGTTTCAGCTTCTA  
ATTGTCTCTACTTTGTGAGACTACTTTTGAATGCTTGACCTCAAATCAGGTAGGACTACC  
CGCTGAACTTAA

>ABC12-1

TTTCCGTAGGTGAACCTGCGGAAGGATCATTATTGAATTATGTTTCTAGATAGGTTGTAG  
CTGGCTC-TTTAGAGCATGTGCACGCCTGTTTGGACTTCATTTTCATCCACCTGTGCACC  
TATTGTAGTCTTTGGTTGGGTTAGGAGGAAGTGGTCATTGTGTCAGCATCTGCTGGATGT  
GAGGACTTGCAATTGTGAAAGCTTTGCTGTCCTTGATGTGATCATGGAATCTCTTTCTCAC  
TAGAGTCTATGTCACCTCATTATACTCTGTGCAATGTCATTGAATGTCTTTACATGGGCTT  
ATATGCCTATGAAAATTGTAATACAACCTTTAGCAACGGATCTCTTGGCTCTCGCATCGA  
TGAAGAACGCAGCGAAATGCGATAAGTAATGTGAATTGCAGAATTCAGTGAATCATCGAA  
TCTTTGAACGCATCTTGCGCTCCTTGGTATTCCGAGGAGCATGCCTGTTTGAGTGTCAATT  
AAATTCTCAACTCTCTTCTAC--TTTTTGAAAAGAGAGCTTGGACTGTGGAGGCTTGCT  
GGCCACTTTTTGGGGTCAGCTCCTCTGAAATGCATTAGCGGAACCGTTTGCGATCTGCCA  
CAAGTGTGATAAGTTATCTACACTGGCGAGGGGATTGCTCTCTGTAATGTTTCAGCTTCTA  
ATTGTCTCTACTTTGTGAGACTACTTTTGAATGCTTGACCTCAAATCAGGTAGGACTACC  
CGCTGAACTTAA

>ABC12-13

TTTCCGTAGGTGAACCTGCGGAAGGATCATTATTGAATTATGTTTCTAGATAGGTTGTAG  
CTGGCTC-TTTAGAGCATGTGCACGCCTGTTTGGACTTCATTTTCATCCACCTGTGCACC  
TATTGTAGTCTTTGGTTGGGTTAGGAGGAAGTGGTCATTGTGTCAGCATCTGCTGGATGT  
GAGGACTTGCAATTGTGAAAGCTTTGCTGTCCTTGATGTGATCATGGAATCTCTTTCTCAC  
TAGAGTCTATGTCACCTCATTATACTCTGTGCAATGTCATTGAATGTCTTTACATGGGCTT  
ATATGCCTATGAAAATTGTAATACAACCTTTAGCAACGGATCTCTTGGCTCTCGCATCGA  
TGAAGAACGCAGCGAAATGCGATAAGTAATGTGAATTGCAGAATTCAGTGAATCATCGAA  
TCTTTGAACGCATCTTGCGCTCCTTGGTATTCCGAGGAGCATGCCTGTTTGAGTGTCAATT  
AAATTCTCAACTCTCTTCTAC--TTTTTGAAAAGAGAGCTTGGACTGTGGAGGCTTGCT  
GGCCACTTTTTGGGGTCAGCTCCTCTGAAATGCATTAGCGGAACCGTTTGCGATCTGCCA  
CAAGTGTGATAAGTTATCTACACTGGCGAGGGGATTGCTCTCTGTAATGTTTCAGCTTCTA  
ATTGTCTCTACTTTGTGAGACTACTTTTGAATGCTTGACCTCAAATCAGGTAGGACTACC  
CGCTGAACTTAA

>ABC12-22

TTTCCGTAGGTGAACCTGCGGAAGGATCATTATTGAATTATGTTTCTAGATAGGTTGTAG



CTGGCTC-TTTAGAGCATGTGCACGCCTGTTTGGACTTCATTTTCATCCACCTGTGCACC  
TATTGTAGTCTTTGGTTGGGTTAGGAGGAAGTGGTCATTGTGTCAGCATCTGCTGGATGT  
GAGGACTTGCATTGTGAAAGCTTTGCTGTCCTTGATGTGATCATGGAATCTCTTTCTCAC  
TAGAGTCTATGTCACCTATTATACTCTGTGCAATGTCATTGAATGTCTTTACATGGGCTT  
ATATGCCTATGAAAATTGTAATACAACCTTTCAGCAACGGATCTCTTGGCTCTCGCATCGA  
TGAAGAACGCAGCGAAATGCGATAAGTAATGTGAATTGCAGAATTCAGTGAATCATCGAA  
TCTTTGAACGCATCTTGCCTCCTTGGTATTCCGAGGAGCATGCCTGTTTGAGTGTCAAT  
AAATTCTCAACTCTCTTCTAC--TTTTTGTAAGAGAGCTTGGACTGTGGAGGCTTGCT  
GGCCACTTTTTGGGGTCAGCTCCTCTGAAATGCATTAGCGGAACCGTTTGCGATCTGCCA  
CAAGTGTGATAAGTTATCTACACTGGCGAGGGGATTGCTCTCTGTAATGTTGAGCTTCTA  
ATTGTCTCTACTTTGTGAGACTACTTTTGAATGCTTGACCTCAAATCAGGTAGGACTACC  
CGCTGAACTTAA

>ABC12-27

TTTCCGTAGGTGAACCTGCGGAAGGATCATTATTGAATTATGTTTCTAGATAGGTTGTAG  
CTGGCTC-TTTAGAGCATGTGCACGCCTGTTTGGACTTCATTTTCATCCACCTGTGCACC  
TATTGTAGTCTTTGGTTGGGTTAGGAGGAAGTGGTCATTGTGTCAGCATCTGCTGGATGT  
GAGGACTTGCATTGTGAAAGCTTTGCTGTCCTTGATGTGATCATGGAATCTCTTTCTCAC  
TAGAGTCTATGTCACCTATTATACTCTGTGCAATGTCATTGAATGTCTTTACATGGGCTT  
ATATGCCTATGAAAATTGTAATACAACCTTTCAGCAACGGATCTCTTGGCTCTCGCATCGA  
TGAAGAACGCAGCGAAATGCGATAAGTAATGTGAATTGCAGAATTCAGTGAATCATCGAA  
TCTTTGAACGCATCTTGCCTCCTTGGTATTCCGAGGAGCATGCCTGTTTGAGTGTCAAT  
AAATTCTCAACTCTCTTCTAC--TTTTTGTAAGAGAGCTTGGACTGTGGAGGCTTGCT  
GGCCACTTTTTGGGGTCAGCTCCTCTGAAATGCATTAGCGGAACCGTTTGCGATCTGCCA  
CAAGTGTGATAAGTTATCTACACTGGCGAGGGGATTGCTCTCTGTAATGTTGAGCTTCTA  
ATTGTCTCTACTTTGTGAGACTACTTTTGAATGCTTGACCTCAAATCAGGTAGGACTACC  
CGCTGAACTTAA

>ABC12-33

TTTCCGTAGGTGAACCTGCGGAAGGATCATTATTGAATTATGTTTCTAGATAGGTTGTAG  
CTGGCTC-TTTAGAGCATGTGCACGCCTGTTTGGACTTCATTTTCATCCACCTGTGCACC  
TATTGTAGTCTTTGGTTGGGTTAGGAGGAAGTGGTCATTGTGTCAGCATCTGCTGGATGT  
GAGGACTTGCATTGTGAAAGCTTTGCTGTCCTTGATGTGATCATGGAATCTCTTTCTCAC  
TAGAGTCTATGTCACCTATTATACTCTGTGCAATGTCATTGAATGTCTTTACATGGGCTT  
ATATGCCTATGAAAATTGTAATACAACCTTTCAGCAACGGATCTCTTGGCTCTCGCATCGA  
TGAAGAACGCAGCGAAATGCGATAAGTAATGTGAATTGCAGAATTCAGTGAATCATCGAA  
TCTTTGAACGCATCTTGCCTCCTTGGTATTCCGAGGAGCATGCCTGTTTGAGTGTCAAT  
AAATTCTCAACTCTCTTCTAC--TTTTTGTAAGAGAGCTTGGACTGTGGAGGCTTGCT  
GGCCACTTTTTGGGGTCAGCTCCTCTGAAATGCATTAGCGGAACCGTTTGCGATCTGCCA  
CAAGTGTGATAAGTTATCTACACTGGCGAGGGGATTGCTCTCTGTAATGTTGAGCTTCTA  
ATTGTCTCTACTTTGTGAGACTACTTTTGAATGCTTGACCTCAAATCAGGTAGGACTACC  
CGCTGAACTTAA

>ABC12-36

TTTCCGTAGGTGAACCTGCGGAAGGATCATTATTGAATTATGTTTCTAGATAGGTTGTAG  
CTGGCTC-TTTAGAGCATGTGCACGCCTGTTTGGACTTCATTTTCATCCACCTGTGCACC  
TATTGTAGTCTTTGGTTGGGTTAGGAGGAAGTGGTCATTGTGTCAGCATCTGCTGGATGT  
GAGGACTTGCATTGTGAAAGCTTTGCTGTCCTTGATGTGATCATGGAATCTCTTTCTCAC  
TAGAGTCTATGTCACCTATTATACTCTGTGCAATGTCATTGAATGTCTTTACATGGGCTT  
ATATGCCTATGAAAATTGTAATACAACCTTTCAGCAACGGATCTCTTGGCTCTCGCATCGA  
TGAAGAACGCAGCGAAATGCGATAAGTAATGTGAATTGCAGAATTCAGTGAATCATCGAA  
TCTTTGAACGCATCTTGCCTCCTTGGTATTCCGAGGAGCATGCCTGTTTGAGTGTCAAT  
AAATTCTCAACTCTCTTCTAC--TTTTTGTAAGAGAGCTTGGACTGTGGAGGCTTGCT



GGCCACTTTTTGGGGTCAGCTCCTCTGAAATGCATTAGCGGAACCGTTTGCGATCTGCCA  
CAAGTGTGATAAGTTATCTACACTGGCGAGGGGATTGCTCTCTGTAATGTTGAGCTTCTA  
ATTGTCTCTACTTTGTGAGACTACTTTTGAATGCTTGACCTCAAATCAGGTAGGACTACC  
CGCTGAACTTAA

>ABC12-37

TTTCCGTAGGTGAACCTGCGGAAGGATCATTATTGAATTATGTTTCTAGATAGGTTGTAG  
CTGGCTC-TTTAGAGCATGTGCACGCCTGTTTGGACTTCATTTTCATCCACCTGTGCACC  
TATTGTAGTCTTTGGTTGGGTTAGGAGGAAGTGGTCATTGTGTCAGCATCTGCTGGATGT  
GAGGACTTGCATTGTGAAAGCTTTGCTGTCCTTGATGTGATCATGGAATCTCTTTCTCAC  
TAGAGTCTATGTCACTCATTATACTCTGTGCAATGTCATTGAATGTCTTTACATGGGCTT  
ATATGCCTATGAAAATTGTAATAACAACCTTTCAGCAACGGATCTCTTGGCTCTCGCATCGA  
TGAAGAACGCAGCGAAATGCGATAAGTAATGTGAATTGCAGAATTCAGTGAATCATCGAA  
TCTTTGAACGCATCTTGCGCTCCTTGGTATTCCGAGGAGCATGCCTGTTTGAGTGTGATT  
AAATTCTCAACTCTCTTCTAC--TTTTTGTAAGAGAGCTTGGACTGTGGAGGCTTGCT  
GGCCACTTTTTGGGGTCAGCTCCTCTGAAATGCATTAGCGGAACCGTTTGCGATCTGCCA  
CAAGTGTGATAAGTTATCTACACTGGCGAGGGGATTGCTCTCTGTAATGTTGAGCTTCTA  
ATTGTCTCTACTTTGTGAGACTACTTTTGAATGCTTGACCTCAAATCAGGTAGGACTACC  
CGCTGAACTTAA

>ABC12-39

TTTCCGTAGGTGAACCTGCGGAAGGATCATTATTGAATTATGTTTCTAGATAGGTTGTAG  
CTGGCTC-TTTAGAGCATGTGCACGCCTGTTTGGACTTCATTTTCATCCACCTGTGCACC  
TATTGTAGTCTTTGGTTGGGTTAGGAGGAAGTGGTCATTGTGTCAGCATCTGCTGGATGT  
GAGGACTTGCATTGTGAAAGCTTTGCTGTCCTTGATGTGATCATGGAATCTCTTTCTCAC  
TAGAGTCTATGTCACTCATTATACTCTGTGCAATGTCATTGAATGTCTTTACATGGGCTT  
ATATGCCTATGAAAATTGTAATAACAACCTTTCAGCAACGGATCTCTTGGCTCTCGCATCGA  
TGAAGAACGCAGCGAAATGCGATAAGTAATGTGAATTGCAGAATTCAGTGAATCATCGAA  
TCTTTGAACGCATCTTGCGCTCCTTGGTATTCCGAGGAGCATGCCTGTTTGAGTGTGATT  
AAATTCTCAACTCTCTTCTAC--TTTTTGTAAGAGAGCTTGGACTGTGGAGGCTTGCT  
GGCCACTTTTTGGGGTCAGCTCCTCTGAAATGCATTAGCGGAACCGTTTGCGATCTGCCA  
CAAGTGTGATAAGTTATCTACACTGGCGAGGGGATTGCTCTCTGTAATGTTGAGCTTCTA  
ATTGTCTCTACTTTGTGAGACTACTTTTGAATGCTTGACCTCAAATCAGGTAGGACTACC  
CGCTGAACTTAA

>ABC12-40

TTTCCGTAGGTGAACCTGCGGAAGGATCATTATTGAATTATGTTTCTAGATAGGTTGTAG  
CTGGCTC-TTTAGAGCATGTGCACGCCTGTTTGGACTTCATTTTCATCCACCTGTGCACC  
TATTGTAGTCTTTGGTTGGGTTAGGAGGAAGTGGTCATTGTGTCAGCATCTGCTGGATGT  
GAGGACTTGCATTGTGAAAGCTTTGCTGTCCTTGATGTGATCATGGAATCTCTTTCTCAC  
TAGAGTCTATGTCACTCATTATACTCTGTGCAATGTCATTGAATGTCTTTACATGGGCTT  
ATATGCCTATGAAAATTGTAATAACAACCTTTCAGCAACGGATCTCTTGGCTCTCGCATCGA  
TGAAGAACGCAGCGAAATGCGATAAGTAATGTGAATTGCAGAATTCAGTGAATCATCGAA  
TCTTTGAACGCATCTTGCGCTCCTTGGTATTCCGAGGAGCATGCCTGTTTGAGTGTGATT  
AAATTCTCAACTCTCTTCTAC--TTTTTGTAAGAGAGCTTGGACTGTGGAGGCTTGCT  
GGCCACTTTTTGGGGTCAGCTCCTCTGAAATGCATTAGCGGAACCGTTTGCGATCTGCCA  
CAAGTGTGATAAGTTATCTACACTGGCGAGGGGATTGCTCTCTGTAATGTTGAGCTTCTA  
ATTGTCTCTACTTTGTGAGACTACTTTTGAATGCTTGACCTCAAATCAGGTAGGACTACC  
CGCTGAACTTAA

>ABC5-82

TTTCCGTAGGTGAACCTGCGGAAGGATCATTATTGAATTATGTTTCTAGATAGGTTGTAG  
CTGGCTC-TTTAGAGCATGTGCACGCCTGTTTGGACTTCATTTTCATCCACCTGTGCACC  
TATTGTAGTCTTTGGTTGGGTTAGGAGGAAGTGGTCATTGTGTCAGCATCTGCTGGATGT



GAGGACTTGCATTGTGAAAGCTTTGCTGTCCTTGATGTGATCATGGAATCTCTTTCTCAC  
TAGAGTCTATGTCACCTATTATACTCTGTGCAATGTCATTGAATGTCTTTACATGGGCTT  
ATATGCCTATGAAAATTGTAATACAACCTTTCAGCAACGGATCTCTTGGCTCTCGCATCGA  
TGAAGAACGCAGCGAAATGCGATAAGTAATGTGAATTGCAGAATTCAGTGAATCATCGAA  
TCTTTGAACGCATCTTGCCTCCTTGGTATTCCGAGGAGCATGCCTGTTTGAGTGTGATT  
AAATTCTCAACTCTCTTCTAC--TTTTTGAAAAGAGAGCTTGGACTGTGGAGGCTTGCT  
GGCCACTTTTTGGGGTCAGCTCCTCTGAAATGCATTAGCGGAACCGTTTGCGATCTGCCA  
CAAGTGTGATAAGTTATCTACACTGGCGAGGGGATTGCTCTCTGTAATGTTTCTAGCTTCTA  
ATTGTCTCTACTTTGTGAGACTACTTTTGAATGCTTGACCTCAAATCAGGTAGGACTACC  
CGCTGAACTTAA

>ABC3-47

TTTCCGTAGGTGAACCTGCGGAAGGATCATTATTGAATTATGTTTCTAGATAGGTTGTAG  
CTGGCTC-TTLAGAGCATGTGCACGCCTGTTTGGACTTCATTTTCATCCACCTGTGCACC  
TATTGTAGTCTTTGGTTGGGTTAGGAGGAAGTGGTCATTGTGTCAGCATCTGCTGGATGT  
GAGGACTTGCATTGTGAAAGCTTTGCTGTCCTTGATGTGATCATGGAATCTCTTTCTCAC  
TAGAGTCTATGTCACCTATTATACTCTGTGCAATGTCATTGAATGTCTTTACATGGGCTT  
ATATGCCTATGAAAATTGTAATACAACCTTTCAGCAACGGATCTCTTGGCTCTCGCATCGA  
TGAAGAACGCAGCGAAATGCGATAAGTAATGTGAATTGCAGAATTCAGTGAATCATCGAA  
TCTTTGAACGCATCTTGCCTCCTTGGTATTCCGAGGAGCATGCCTGTTTGAGTGTGATT  
AAATTCTCAACTCTCTTCTAC--TTTTTGAAAAGAGAGCTTGGACTGTGGAGGCTTGCT  
GGCCACTTTTTGGGGTCAGCTCCTCTGAAATGCATTAGCGGAACCGTTTGCGATCTGCCA  
CAAGTGTGATAAGTTATCTACACTGGCGAGGGGATTGCTCTCTGTAATGTTTCTAGCTTCTA  
ATTGTCTCTACTTTGTGAGACTACTTTTGAATGCTTGACCTCAAATCAGGTAGGACTACC  
CGCTGAACTTAA

>ABC10-47

TTTCCGTAGGTGAACCTGCGGAAGGATCATTATTGAATTATGTTTCTAGATAGGTTGTAG  
CTGGCTC-TTLAGAGCATGTGCACGCCTGTTTGGACTTCATTTTCATCCACCTGTGCACC  
TATTGTAGTCTTTGGTTGGGTTAGGAGGAAGTGGTCATTGTGTCAGCATCTGCTGGATGT  
GAGGACTTGCATTGTGAAAGCTTTGCTGTCCTTGATGTGATCATGGAATCTCTTTCTCAC  
TAGAGTCTATGTCACCTATTATACTCTGTGCAATGTCATTGAATGTCTTTACATGGGCTT  
ATATGCCTATGAAAATTGTAATACAACCTTTCAGCAACGGATCTCTTGGCTCTCGCATCGA  
TGAAGAACGCAGCGAAATGCGATAAGTAATGTGAATTGCAGAATTCAGTGAATCATCGAA  
TCTTTGAACGCATCTTGCCTCCTTGGTATTCCGAGGAGCATGCCTGTTTGAGTGTGATT  
AAATTCTCAACTCTCTTCTAC--TTTTTGAAAAGAGAGCTTGGACTGTGGAGGCTTGCT  
GGCCACTTTTTGGGGTCAGCTCCTCTGAAATGCATTAGCGGAACCGTTTGCGATCTGCCA  
CAAGTGTGATAAGTTATCTACACTGGCGAGGGGATTGCTCTCTGTAATGTTTCTAGCTTCTA  
ATTGTCTCTACTTTGTGAGACTACTTTTGAATGCTTGACCTCAAATCAGGTAGGACTACC  
CGCTGAACTTAA

>ABC5-81

TTTCCGTAGGTGAACCTGCGGAAGGATCATTATTGAATTATGTTTCTAGATAGGTTGTAG  
CTGGCTC-TTLAGAGCATGTGCACGCCTGTTTGGACTTCATTTTCATCCACCTGTGCACC  
TATTGTAGTCTTTGGTTGGGTTAGGGGGAAGTGGTCATTGTGTCAGCATCTGCTGGATGT  
GAGGACTTGCATTGTGAAAGCTTTGCTGTCCTTGATGTGATCATGGAATCTCTTTCTCAC  
TAGAGTCTATGTCACCTATTATACTCTGTGCAATGTCATTGAATGTCTTTACATGGGCTT  
ATATGCCTATGAAAATTGTAATACAACCTTTCAGCAACGGATCTCTTGGCTCTCGCATCGA  
TGAAGAACGCAGCGAAATGCGATAAGTAATGTGAATTGCAGAATTCAGTGAATCATCGAA  
TCTTTGAACGCATCTTGCCTCCTTGGTATTCCGAGGAGCATGCCTGTTTGAGTGTGATT  
AAATTCTCAACTCTCTTCTAC--TTTTTGAAAAGAGAGCTTGGACTGTGGAGGCTTGCT  
GGCCACTTTTTGGGGTCAGCTCCTCTGAAATGCATTAGCGGAACCGTTTGCGATCTGCCA  
CAAGTGTGATAAGTTATCTACACTGGCGAGGGGATTGCTCTCTGTAATGTTTCTAGCTTCTA



ATTGTCTCTACTTTGTGAGACTACTTTTGAATGCTTGACCTCAAATCAGGTAGGACTACC  
CGCTGAACTTAA

>ABC8-49

TTTCCGTAGGTGAACCTGCGGAAGGATCATTATTGAATTATGTTTCTAGATAGGTTGTAG  
CTGGCTC-TTTAGAGCATGTGCACGCCTGTTTGGACTTCATTTTCATCCACCTGTGCACC  
TATTGTAGTCTTTGGTTGGGTTAGGGGGAAGTGGTCATTGTGTCAGCATCTGCTGGATGT  
GAGGACTTGCATTGTGAAAGCTTTGCTGTCCTTGATGTGATCATGGAATCTCTTTCTCAC  
TAGAGTCTATGTCACTCATTATACTCTGTGCAATGTCATTGAATGTCTTTACATGGGCTT  
ATATGCCTATGAAAATTGTAATAACAACCTTTCAGCAACGGATCTCTTGGCTCTCGCATCGA  
TGAAGAACGCAGCGAAATGCGATAAGTAATGTGAATTGCAGAATTCAGTGAATCATCGAA  
TCTTTGAACGCATCTTGCCTCCTTGGTATTCCGAGGAGCATGCCTGTTTGAGTGTCAAT  
AAATTCTCAACTCTCTTCTAC--TTTTGTAAAAGAGAGCTTGGACTGTGGAGGCTTGCT  
GGCCACTTTTTGGGGTCAGCTCCTCTGAAATGCATTAGCGGAACCGTTTGCGATCTGCCA  
CAAGTGTGATAAGTTATCTACACTGGCGAGGGGATTGCTCTCTGTAATGTTTCAGCTTCTA  
ATTGTCTCTACTTTGTGAGACTACTTTTGAATGCTTGACCTCAAATCAGGTAGGACTACC  
CGCTGAACTTAA

>ABC9-38

TTTCCGTAGGTGAACCTGCGGAAGGATCATTATTGAATTATGTTTCTAGATAGGTTGTAG  
CTGGCTC-TTTAGAGCATGTGCACGCCTGTTTGGACTTCATTTTCATCCACCTGTGCACC  
TATTGTAGTCTTTGGTTGGGTTAGGGGGAAGTGGTCATTGTGTCAGCATCTGCTGGATGT  
GAGGACTTGCATTGTGAAAGCTTTGCTGTCCTTGATGTGATCATGGAATCTCTTTCTCAC  
TAGAGTCTATGTCACTCATTATACTCTGTGCAATGTCATTGAATGTCTTTACATGGGCTT  
ATATGCCTATGAAAATTGTAATAACAACCTTTCAGCAACGGATCTCTTGGCTCTCGCATCGA  
TGAAGAACGCAGCGAAATGCGATAAGTAATGTGAATTGCAGAATTCAGTGAATCATCGAA  
TCTTTGAACGCATCTTGCCTCCTTGGTATTCCGAGGAGCATGCCTGTTTGAGTGTCAAT  
AAATTCTCAACTCTCTTCTAC--TTTTGTAAAAGAGAGCTTGGACTGTGGAGGCTTGCT  
GGCCACTTTTTGGGGTCAGCTCCTCTGAAATGCATTAGCGGAACCGTTTGCGATCTGCCA  
CAAGTGTGATAAGTTATCTACACTGGCGAGGGGATTGCTCTCTGTAATGTTTCAGCTTCTA  
ATTGTCTCTACTTTGTGAGACTACTTTTGAATGCTTGACCTCAAATCAGGTAGGACTACC  
CGCTGAACTTAA

>ABC11-53

TTTCCGTAGGTGAACCTGCGGAAGGATCATTATTGAATTATGTTTCTAGATAGGTTGTAG  
CTGGCTC-TTTAGAGCATGTGCACGCCTGTTTGGACTTCATTTTCATCCACCTGTGCACC  
TATTGTAGTCTTTGGTTGGGTTAGGGGGAAGTGGTCATTGTGTCAGCATCTGCTGGATGT  
GAGGACTTGCATTGTGAAAGCTTTGCTGTCCTTGATGTGATCATGGAATCTCTTTCTCAC  
TAGAGTCTATGTCACTCATTATACTCTGTGCAATGTCATTGAATGTCTTTACATGGGCTT  
ATATGCCTATGAAAATTGTAATAACAACCTTTCAGCAACGGATCTCTTGGCTCTCGCATCGA  
TGAAGAACGCAGCGAAATGCGATAAGTAATGTGAATTGCAGAATTCAGTGAATCATCGAA  
TCTTTGAACGCATCTTGCCTCCTTGGTATTCCGAGGAGCATGCCTGTTTGAGTGTCAAT  
AAATTCTCAACTCTCTTCTAC--TTTTGTAAAAGAGAGCTTGGACTGTGGAGGCTTGCT  
GGCCACTTTTTGGGGTCAGCTCCTCTGAAATGCATTAGCGGAACCGTTTGCGATCTGCCA  
CAAGTGTGATAAGTTATCTACACTGGCGAGGGGATTGCTCTCTGTAATGTTTCAGCTTCTA  
ATTGTCTCTACTTTGTGAGACTACTTTTGAATGCTTGACCTCAAATCAGGTAGGACTACC  
CGCTGAACTTAA

>ABC12-34

TTTCCGTAGGTGAACCTGCGGAAGGATCATTATTGAATTATGTTTCTAGATAGGTTGTAG  
CTGGCTC-TTTAGAGCATGTGCACGCCTGTTTGGACTTCATTTTCATCCACCTGTGCACC  
TATTGTAGTCTTTGGTTGGGTTAGGGGGAAGTGGTCATTGTGTCAGCATCTGCTGGATGT  
GAGGACTTGCATTGTGAAAGCTTTGCTGTCCTTGATGTGATCATGGAATCTCTTTCTCAC  
TAGAGTCTATGTCACTCATTATACTCTGTGCAATGTCATTGAATGTCTTTACATGGGCTT



ATATGCCTATGAAAATTGTAATACAACCTTTTCAGCAACGGATCTCTTGGCTCTCGCATCGA  
TGAAGAACGCAGCGAAATGCGATAAGTAATGTGAATTGCAGAATTCAGTGAATCATCGAA  
TCTTTGAACGCATCTTGCCTCCTTGGTATTCCGAGGAGCATGCCTGTTTGAGTGTCAAT  
AAATTCTCAACTCTCTTCTAC--TTTTTGAAAAGAGAGCTTGGACTGTGGAGGCTTGCT  
GGCCACTTTTTGGGGTCAGCTCCTCTGAAATGCATTAGCGGAACCGTTTGCGATCTGCCA  
CAAGTGTGATAAGTTATCTACACTGGCGAGGGGATTGCTCTCTGTAATGTTTCAGCTTCTA  
ATTGTCTCTACTTTGTGAGACTACTTTTGAATGCTTGACCTCAAATCAGGTAGGACTACC  
CGCTGAACTTAA

>ABC7-55

TTTCCGTAGGTGAACCTGCGGAAGGATCATTATTGAATTATGTTTCTAGATAGGTTGTAG  
CTGGCTC-TTLAGAGCATGTGCACGCCTGTTTGGACTTCATTTTCATCCACCTGTGCACC  
TATTGTAGTCTTTGGTTGGGTTAGGAGGAAGTGATCATTGTGTCAGCATCTGCTGGATGT  
GAGGACTTGCATTGTGAAAGCTTTGCTGTCCTTGATGTGATCATGGAATCTCTTTCTCAC  
TAGAGTCTATGTCACCTCATTATACTCTGTGCGAATGTCATTGAATGTCTTTACATGGGCTT  
ATATGCCTATGAAAATTGTAATACAACCTTTTCAGCAACGGATCTCTTGGCTCTCGCATCGA  
TGAAGAACGCAGCGAAATGCGATAAGTAATGTGAATTGCAGAATTCAGTGAATCATCGAA  
TCTTTGAACGCATCTTGCCTCCTTGGTATTCCGAGGAGCATGCCTGTTTGAGTGTCAAT  
AAATTCTCAACTCTCTTCTAC--TTTTTGAAAAGAGAGCTTGGACTGTGGAGGCTTGCT  
GGCCACTTTTTGGGGTCAGCTCCTCTGAAATGCATTAGCGGAACCGTTTGCGATCTGCCA  
CAAGTGTGATAAGTTATCTACACTGGCGAGGGGATTGCTCTCTGTAATGTTTCAGCTTCTA  
ATTGTCTCTACTTTGTGAGACTACTTTTGAATGCTTGACCTCAAATCAGGTAGGACTACC  
CGCTGAACTTAA

>ABC12-50

TTTCCGTAGGTGAACCTGCGGAAGGATCATTATTGAATTATGTTTCTAGATAGGTTGTAG  
CTGGCTC-TTLAGAGCATGTGCACGCCTGTTTGGACTTCATTTTCATCCACCTGTGCACC  
TATTGTAGTCTTTGGTTGGGTTAGGAGGAAGTGGTCATTGTGTCAGCATCTGCTGGATGT  
GAGGACTTGCATTGTGAAAGCTTTGCTGTCCTTGATGTGATCATGGAATCTCTTTCTCAC  
TAGAGTCTATGTCACCTCATTATACTCTGTGCGAATGTCATTGAATGTCTTTACATGGGCTT  
ATATGCCTATGAAAATTGTAATACAACCTTTTCAGCAACGGATCTCTTGGCTCTCGCATCGA  
TGAAGAACGCAGCGAAATGCGATAAGTAATGTGAATTGCAGAATTCAGTGAATCATCGAA  
TCTTTGAACGCATCTTGCCTCCTTGGTATTCCGAGGAGCATGCCTGTTTGAGTGTCAAT  
AAATTCTCAACTCTCTTCTAC--TTTTTGAAAAGAGAGCTTGGACTGTGGAGGCTTGCT  
GGCCACTTTTTGGGGTCAGCTCCTCTGAAATGCATTAGCGGAACCGTTTGCGATCTGCCA  
CAAGTGTGATAAGTTATCTGCACTGGCGAGGGGATTGCTCTCTGTAATGTTTCAGCTTCTA  
ATTGTCTCTACTTTGTGAGACTACTTTTGAATGCTTGACCTCAAATCAGGTAGGACTACC  
CGCTGAACTTAA

>ABC9-13

TTTCCGTAGGTGAACCTGCGGAAGGATCATTATTGAATTATGTTTCTAGATAGGTTGTAG  
CTGGCTC-TTLAGAGCATGTGCACGCCTGTTTGGACTTCATTTTCATCCACCTGTGCACC  
TATTGTAGTCTTTGGTTGGGTTAGGAGGAAGTGGTCATTGTGTCAGCATCTGCTGGATGT  
GAGGACTTGCATTGTGAAAGCTTTGCTGTCCTTGATGTGATCATGGAATCTCTTTCTCAC  
TAGAGTCTATGTCACCTCATTATACTCTGTGCGAATGTCATTGAATGTCTTTACATGGGCTT  
ATATGCCTATGAAAATTGTAATACAACCTTTTCAGCAACGGATCTCTTGGCTCTCGCATCGA  
TGAAGAACGCAGCGAAATGCGATAAGTAATGTGAATTGCAGAATTCAGTGAATCATCGAA  
TCTTTGAACGCATCTTGCCTCCTTGGTATTCCGAGGAGCATGCCTGTTTGAGTGTCAAT  
AAATTCTCAACTCTCTTCTAC--TTTTTGAAAAGAGAGCTTGGACTGTGGAGGCTTGCT  
GGCCACTTTTTGGGGTCAGCTCCTCTGAAATGCATTAGCGGAACCGTTTGCGATCTGCCA  
CAAGTGTGATAAGTTATCTACACTGGCGAGGGGATTGTTCTCTGTAATGTTTCAGCTTCTA  
ATTGTCTCTACTTTGTGAGACTACTTTTGAATGCTTGACCTCAAATCAGGTAGGACTACC  
CGCTGAACTTAA



>ABC4-38

TTTCCGTAGGTGAACCTGCGGAAGGATCATTATTGAATTATGTTTCTAGATAGGTTGTAG  
CTGGCTC-TTTAGAGCATGTGCACGCCTGTTTGGACTTCATTTTCATCCACCTGTGCACC  
TATTGTAGTCTTTGGTTGGGTTAGGAGGAAGTGGTCATTGTGTCAGCATCTGCTGGATGT  
GAGGACTTGCATTGTGAAAGCTTTGCTGTCCTTGATGTGATCATGGAATCTCTTTCTCAC  
TAGAGTCTATGTCACCTCATTATACTCTGTGCGAATGTCATTGAATGTCTTTACATGGGCTT  
ATATGCCTATGAAAATTGTAATACAACCTTTCAGCAACGGATCTCTTGGCTCTCGCATCGA  
TGAAGAACGCAGCGAAATGCGATAAGTAATGTGAATTGCAGAATTCAGTGAATCATCGAA  
TCTTTGAACGCATCTTGCCTCCTTGGTATTCCGAGGAGCATGCCTGTTTGAGTGTCTATT  
AAATTCTCAACTCTCTTCTAC--TTTTGTAAAAGAGAGCTTGGACTGTGGAGGCTTGCT  
GGCCACTTTTTGGGGTCAGCTCCTCTGAAATGCATTAGTGAACCGTTTGCGATCTGCCA  
CAAGTGTGATAAGTTATCTACACTGGCGAGGGGATTGCTCTCTGTAATGTTTCAGCTTCTA  
ATTGTCTCTACTTTGTGAGACTACTTTTGAATGCTTGACCTCAAATCAGGTAGGACTACC  
CGCTGAACTTAA

>ABC11-9

TTTCCGTAGGTGAACCTGCGGAAGGATCATTATTGAATTATGTTTCTAGATAGGTTGTAG  
CTGGCTC-TTTAGAGCATGTGCACGCCTGTTTGGACTTCATTTTCATCCACCTGTGCACC  
TATTGTAGTCTTTGGTTGGGTTAGGAGGAAGTGGTCATTGTGTCAGCATCTGCTGGATGT  
GAGGACTTGCATTGTGAAAGCTTTGTTGTCCTTGATGTGATCATGGAATCTCTTTCTCAC  
TAGAGTCTATGTCACCTCATTATACTCTGTGCGAATGTCATTGAATGTCTTTACATGGGCTT  
ATATGCCTATGAAAATTGTAATACAACCTTTCAGCAACGGATCTCTTGGCTCTCGCATCGA  
TGAAGAACGCAGCGAAATGCGATAAGTAATGTGAATTGCAGAATTCAGTGAATCATCGAA  
TCTTTGAACGCATCTTGCCTCCTTGGTATTCCGAGGAGCATGCCTGTTTGAGTGTCTATT  
AAATTCTCAACTCTCTTCTAC--TTTTGTAAAAGAGAGCTTGGACTGTGGAGGCTTGCT  
GGCCACTTTTTGGGGTCAGCTCCTCTGAAATGCATTAGCGGAACCGTTTGCGATCTGCCA  
CAAGTGTGATAAGTTATCTACACTGGCGAGGGGATTGCTCTCTGTAATGTTTCAGCTTCTA  
ATTGTCTCTACTTTGTGAGACTACTTTTGAATGCTTGACCTCAAATCAGGTAGGACTACC  
CGCTGAACTTAA

>ABC8-43

TTTCCGTAGGTGAACCTGCGGAAGGATCATTATTGAATTATGTTTCTAGATAGGTTGTAG  
CTGGCTC-TTTAGAGCATGTGCACGCCTGTTTGGACTTCATTTTCATCCACCTGTGCACC  
TATTGTAGTCTTTGGTTGGGTTAGGAGGAAGTGGTCATTGTGTCAGCATCTGCTGGATGT  
GAGGACTTGCATTGTGAAAGCTTTGCTGTCCTTGATGTGATCATGGAATCTCTTTCTCAC  
TAGAGTCTATGTCACCTCATTATACTCTGTGCGAATGTCATTGAATGTCTTTACATGGGCTT  
ATATGCCTATGAAAATTGTAATACAACCTTTCAGCAACGGATCTCTTGGCTCTCGCATCGA  
TGAAGAACGCAGCGAAATGCGATAAGTAATGTGAATTGCAGAATTCAGTGAATCATCGAA  
TCTTTGAACACATCTTGCCTCCTTGGTATTCCGAGGAGCATGCCTGTTTGAGTGTCTATT  
AAATTCTCAACTCTCTTCTAC--TTTTGTAAAAGAGAGCTTGGACTGTGGAGGCTTGCT  
GGCCACTTTTTGGGGTCAGCTCCTCTGAAATGCATTAGCGGAACCGTTTGCGATCTGCCA  
CAAGTGTGATAAGTTATCTACACTGGCGAGGGGATTGCTCTCTGTAATGTTTCAGCTTCTA  
ATTGTCTCTACTTTGTGAGACTACTTTTGAATGCTTGACCTCAAATCAGGTAGGACTACC  
CGCTGAACTTAA

>ABC7-30

TTTCCGTAGGTGAACCTGCGGAAGGATCATTATTGAATTATGTTTCTAGATAGGTTGTAG  
CTGGCTC-TTTAGAGCATGTGCACGCCTGTTTGGACTTCATTTTCATCCACCTGTGCACC  
TATTGTAGTCTTTGGTTGGGTTAGGAGGAAGTGGTCATTGTGTCAGCATCTGCTGGATGT  
GAGGACTTACATTGTGAAAGCTTTGCTGTCCTTGATGTGATCATGGAATCTCTTTCTCAC  
TAGAGTCTATGTCACCTCATTATACTCTGTGCGAATGTCATTGAATGTCTTTACATGGGCTT  
ATATGCCTATGAAAATTGTAATACAACCTTTCAGCAACGGATCTCTTGGCTCTCGCATCGA  
TGAAGAACGCAGCGAAATGCGATAAGTAATGTGAATTGCAGAATTCAGTGAATCATCGAA



TCTTTGAACGCATCTTGCGCTCCTTGGTATTCCGAGGAGCATGCCTGTTTGAGTGTCAATT  
AAATTCTCAACTCTCTTCTAC--TTTTGTAAAAGAGAGCTTGGACTGTGGAGGCTTGCT  
GGCCACTTTTTGGGGTCAGCTCCTCTGAAATGCATTAGCGGAACCGTTTGCGATCTGCCA  
CAAGTGTGATAAGTTATCTACACTGGCGAGGGGATTGCTCTCTGTAATGTTTCAGCTTCTA  
ATTGTCTCTACTTTGTGAGACTACTTTTGAATGCTTGACCTCAAATCAGGTAGGACTACC  
CGCTGAACTTAA

>ABC1-51

TTTCCGTAGGTGAACCTGCGGAAGGATCATTATTGAATTATGTTTCTAGATAGGTTGTAG  
CTGGCTC-TTTAGAGCATGTGCACGCCTGTTTGGACTTCATTTTCATCCACCTGTGCACC  
TATTGTAGTCTTTGGTTGGGTTAGGGGGAAGTGGTCATTGTGTCAGCATCTGCTGGATGT  
GAGGACTTGCAATTGTGAAAGCTTTGCTGTCCTTGATGTGATCATGGAATCTCTTTCTCAC  
TAGAGTCTATGTCACCTCATTATACTCTGTGCAATGTCATTGAATGTCTTTACATGGGCTT  
GTATGCCTATGAAAATTGTAATACAACCTTTCAGCAACGGATCTCTTGGCTCTCGCATCGA  
TGAAGGACGCAGCGAAATGCGATAAGTAATGTGAATTGCAGAATTCAGTGAATCATCGAA  
TCTTTGAACGCATCTTGCGCTCCTTGGTATTCCGAGGAGCATGCCTGTTTGAGTGTCAATT  
AAATTCTCAACTCTCTTCTAC--TTTTGTAAAAGAGAGCTTGGACTGTGGAGGCTTGCT  
GGCCACTTTTTGGGGTCAGCTCCTCTGAAATGCATTAGCGGAACCGTTTGCGATCTGCCA  
CAAGTGTGATAAGTTATCTACACTGGCGAGGGGATTGCTCTCTGTAATGTTTCAGCTTCTA  
ATTGTCTCTACTTTGTGAGACTACTTTTGAATGCTTGACCTCAAATCAGGTAGGACTACC  
CGCTGAACTTAA

>ABC7-12

TTTCCGTAGGTGAACCTGCGGAAGGATCATTATTGAATTATGTTTCTAGATAGGTTGTAG  
CTGGCTC-TTTAGAGCATGTGCACGCCTGTTTGGACTTCATTTTCATCCACCTGTGCACC  
TATTGTAGTCTTTGGTTGGGTTAGGGGGAAGTGGTCATTGTGTCAGCATCTGCTGGATGT  
GAGGACTTGCAATTGTGAAAGCTTTGCTGTCCTTGATGTGATCATGGAATCTCTTTCTCAC  
TAGAGTCTATGTCACCTCATTATACTCTGTGCAATGTCATTGAATGTCTTTACATGGGCTT  
GTATGCCTATGAAAATTGTAATACAACCTTTCAGCAACGGATCTCTTGGCTCTCGCATCGA  
TGAAGGACGCAGCGAAATGCGATAAGTAATGTGAATTGCAGAATTCAGTGAATCATCGAA  
TCTTTGAACGCATCTTGCGCTCCTTGGTATTCCGAGGAGCATGCCTGTTTGAGTGTCAATT  
AAATTCTCAACTCTCTTCTAC--TTTTGTAAAAGAGAGCTTGGACTGTGGAGGCTTGCT  
GGCCACTTTTTGGGGTCAGCTCCTCTGAAATGCATTAGCGGAACCGTTTGCGATCTGCCA  
CAAGTGTGATAAGTTATCTACACTGGCGAGGGGATTGCTCTCTGTAATGTTTCAGCTTCTA  
ATTGTCTCTACTTTGTGAGACTACTTTTGAATGCTTGACCTCAAATCAGGTAGGACTACC  
CGCTGAACTTAA

>ABC8-5

TTTCCGTAGGTGAACCTGCGGAAGGATCATTATTGAATTATGTTTCTAGATAGGTTGTAG  
CTGGCTC-TTTAGAGCATGTGCACGCCTGTTTGGACTTCATTTTCATCCACCTGTGCACC  
TATTGTAGTCTTTGGTTGGGTTAGGGGGAAGTGGTCATTGTGTCAGCATCTGCTGGATGT  
GAGGACTTGCAATTGTGAAAGCTTTGCTGTCCTTGATGTGATCATGGAATCTCTTTCTCAC  
TAGAGTCTATGTCACCTCATTATACTCTGTGCAATGTCATTGAATGTCTTTACATGGGCTT  
GTATGCCTATGAAAATTGTAATACAACCTTTCAGCAACGGATCTCTTGGCTCTCGCATCGA  
TGAAGGACGCAGCGAAATGCGATAAGTAATGTGAATTGCAGAATTCAGTGAATCATCGAA  
TCTTTGAACGCATCTTGCGCTCCTTGGTATTCCGAGGAGCATGCCTGTTTGAGTGTCAATT  
AAATTCTCAACTCTCTTCTAC--TTTTGTAAAAGAGAGCTTGGACTGTGGAGGCTTGCT  
GGCCACTTTTTGGGGTCAGCTCCTCTGAAATGCATTAGCGGAACCGTTTGCGATCTGCCA  
CAAGTGTGATAAGTTATCTACACTGGCGAGGGGATTGCTCTCTGTAATGTTTCAGCTTCTA  
ATTGTCTCTACTTTGTGAGACTACTTTTGAATGCTTGACCTCAAATCAGGTAGGACTACC  
CGCTGAACTTAA

>ABC5-24

TTTCCGTAGGTGAACCTGCGGAAGGATCATTATTGAATTATGTTTCTAGATAGGTTGTAG



CTGGCTC-TTTAGAGCATGTGCACGCCTGTTTGGACTTCATTTTCATCCACCTGTGCACC  
TATTGTAGTCTTTGGTTGGGTTAGGGGGAAGTGGTCATTGTGTCAGCATCTGCTGGATGT  
GAGGACTTGCATTGTGAAAGCTTTGCTGTCCTTGATGTGATCATGGAATCTCTTTCTCAC  
TAGAGTCTATGTCACCTATTATACTCTGTGCAATGTCATTGAATGTCTTTACATGGGCTT  
GTATGCCTATGAAAATTGTAATACAACCTTTCAGCAACGGATCTCTTGGCTCTCGCATCGA  
TGAAGAACGCAGCGAAATGCGATAAGTAATGTGAATTGCAGAATTCAGTGAATCATCGAA  
TCTTTGAACGCATCTTGCCTCCTTGGTATTCCGAGGAGCATGCCTGTTTGAGTGTCAAT  
AAATTCTCAACTCTCTTCTAC--TTTTTGTAAGAGAGCTTGGACTGTGGAGGCTTGCT  
GGCCACTTTTTGGGGTCAGCTCCTCTGAAATGCATTAGCGGAACCGTTTGCGATCTGCCA  
CAAGTGTGATAAGTTATCTACACTGGCGAGGGGATTGCTCTCTGTAATGTTGAGCTTCTA  
ATTGTCTCTACTTTGTGAGACTACTTTTGAATGCTTGACCTCAAATCAGGTAGGACTACC  
CGCTGAACTTAA

>ABC8-6

TTTCCGTAGGTGAACCTGCGGAAGGATCATTATTGAATTATGTTTCTAGATAGGTTGTAG  
CTGGCTC-TTTAGAGCATGTGCACGCCTGTTTGGACTTCATTTTCATCCACCTGTGCACC  
TATTGTAGTCTTTGGTTGGGTTAGGGGGAAGTGGTCATTGTGTCAGCATCTGCTGGATGT  
GAGGACTTGCATTGTGAAAGCTTTGCTGTCCTTGATGTGATCATGGAATCTCTTTCTCAC  
TAGAGTCTATGTCACCTATTATACTCTGTGCAATGTCATTGAATGTCTTTACATGGGCTT  
GTATGCCTATGAAAATTGTAATACAACCTTTCAGCAACGGATCTCTTGGCTCTCGCATCGA  
TGAAGAACGCAGCGAAATGCGATAAGTAATGTGAATTGCAGAATTCAGTGAATCATCGAA  
TCTTTGAACGCATCTTGCCTCCTTGGTATTCCGAGGAGCATGCCTGTTTGAGTGTCAAT  
AAATTCTCAACTCTCTTCTAC--TTTTTGTAAGAGAGCTTGGACTGTGGAGGCTTGCT  
GGCCACTTTTTGGGGTCAGCTCCTCTGAAATGCATTAGCGGAACCGTTTGCGATCTGCCA  
CAAGTGTGATAAGTTATCTACACTGGCGAGGGGATTGCTCTCTGTAATGTTGAGCTTCTA  
ATTGTCTCTACTTTGTGAGACTACTTTTGAATGCTTGACCTCAAATCAGGTAGGACTACC  
CGCTGAACTTAA

>ABC11-42

TTTCCGTAGGTGAACCTGCGGAAGGATCATTATTGAATTATGTTTCTAGATAGGTTGTAG  
CTGGCTC-TTTAGAGCATGTGCACGCCTGTTTGGACTTCATTTTCATCCACCTGTGCACC  
TATTGTAGTCTTTGGTTGGGTTAGGGGGAAGTGGTCATTGTGTCAGCATCTGCTGGATGT  
GAGGACTTGCATTGTGAAAGCTTTGCTGTCCTTGATGTGATCATGGAATCTCTTTCTCAC  
TAGAGTCTATGTCACCTATTATACTCTGTGCAATGTCATTGAATGTCTTTACATGGGCTT  
GTATGCCTATGAAAATTGTAATACAACCTTTCAGCAACGGATCTCTTGGCTCTCGCATCGA  
TGAAGAACGCAGCGAAATGCGATAAGTAATGTGAATTGCAGAATTCAGTGAATCATCGAA  
TCTTTGAACGCATCTTGCCTCCTTGGTATTCCGAGGAGCATGCCTGTTTGAGTGTCAAT  
AAATTCTCAACTCTCTTCTAC--TTTTTGTAAGAGAGCTTGGACTGTGGAGGCTTGCT  
GGCCACTTTTTGGGGTCAGCTCCTCTGAAATGCATTAGCGGAACCGTTTGCGATCTGCCA  
CAAGTGTGATAAGTTATCTACACTGGCGAGGGGATTGCTCTCTGTAATGTTGAGCTTCTA  
ATTGTCTCTACTTTGTGAGACTACTTTTGAATGCTTGACCTCAAATCAGGTAGGACTACC  
CGCTGAACTTAA

>ABC12-28

TTTCCGTAGGTGAACCTGCGGAAGGATCATTATTGAATTATGTTTCTAGATAGGTTGTAG  
CTGGCTC-TTTAGAGCATGTGCACGCCTGTTTGGACTTCATTTTCATCCACCTGTGCACC  
TATTGTAGTCTTTGGTTGGGTTAGGGGGAAGTGGTCATTGTGTCAGCATCTGCTGGATGT  
GAGGACTTGCATTGTGAAAGCTTTGCTGTCCTTGATGTGATCATGGAATCTCTTTCTCAC  
TAGAGTCTATGTCACCTATTATACTCTGTGCAATGTCATTGAATGTCTTTACATGGGCTT  
GTATGCCTATGAAAATTGTAATACAACCTTTCAGCAACGGATCTCTTGGCTCTCGCATCGA  
TGAAGAACGCAGCGAAATGCGATAAGTAATGTGAATTGCAGAATTCAGTGAATCATCGAA  
TCTTTGAACGCATCTTGCCTCCTTGGTATTCCGAGGAGCATGCCTGTTTGAGTGTCAAT  
AAATTCTCAACTCTCTTCTAC--TTTTTGTAAGAGAGCTTGGACTGTGGAGGCTTGCT



GGCCACTTTTTGGGGTCAGCTCCTCTGAAATGCATTAGCGGAACCGTTTGCGATCTGCCA  
CAAGTGTGATAAGTTATCTACACTGGCGAGGGGATTGCTCTCTGTAATGTTGAGCTTCTA  
ATTGTCTCTACTTTGTGAGACTACTTTTGAATGCTTGACCTCAAATCAGGTAGGACTACC  
CGCTGAACTTAA

>ABC3-22

TTTCCGTAGGTGAACCTGCGGAAGGATCATTATTGAATTATGTTTCTAGATAGGTTGTAG  
CTGGCTC-TTTAGAGCATGTGCACGCCTGTTTGGACTTCATTTTCATCCACCTGTGCACC  
TATTGTAGTCTTTGGTTGGGTTAGGAGGAAGTGGTCATTGTGTCAGCATCTGCTGGATGT  
GAGGACTTGCATTGTGAAAGCTTTGCTGTCCTTGATGTGATCATGGAATCTCTTTCTCAC  
TAGAGTCTATGTCACTCATTATACTCTGTGCAATGTCATTGAATGTCTTTACATGGGCTT  
ATATGCCTATGAAAATTGTAATAACAACCTTTCAGCAACGGATCTCTTGGCTCTCGCATCGA  
TGAAGGACGCAGCGAAATGCGATAAGTAATGTGAATTGCAGAATTCAGTGAATCATCGAA  
TCTTTGAACGCATCTTGCGCTCCTTGGTATTCCGAGGAGCATGCCTGTTTGAGTGTGATT  
AAATTCTCAACTCTCTTCTAC--TTTTTGTAAGAGAGCTTGGACTGTGGAGGCTTGCT  
GGCCACTTTTTGGGGTCAGCTCCTCTGAAATGCATTAGCGGAACCGTTTGCGATCTGCCA  
CAAGTGTGATAAGTTATCTACACTGGCGAGGGGATTGCTCTCTGTAATGTTGAGCTTCTA  
ATTGTCTCTACTTTGTGAGACTACTTTTGAATGCTTGACCTCAAATCAGGTAGGACTACC  
CGCTGAACTTAA

>ABC3-39

TTTCCGTAGGTGAACCTGCGGAAGGATCATTATTGAATTATGTTTCTAGATAGGTTGTAG  
CTGGCTC-TTTAGAGCATGTGCACGCCTGTTTGGACTTCATTTTCATCCACCTGTGCACC  
TATTGTAGTCTTTGGTTGGGTTAGGAGGAAGTGGTCATTGTGTCAGCATCTGCTGGATGT  
GAGGACTTGCATTGTGAAAGCTTTGCTGTCCTTGATGTGATCATGGAATCTCTTTCTCAC  
TAGAGTCTATGTCACTCATTATACTCTGTGCAATGTCATTGAATGTCTTTACATGGGCTT  
GTATGCCTATGAAAATTGTAATAACAACCTTTCAGCAACGGATCTCTTGGCTCTCGCATCGA  
TGAAGGACGCAGCGAAATGCGATAAGTAATGTGAATTGCAGAATTCAGTGAATCATCGAA  
TCTTTGAACGCATCTTGCGCTCCTTGGTATTCCGAGGAGCATGCCTGTTTGAGTGTGATT  
AAATTCTCAACTCTCTTCTAC--TTTTTGTAAGAGAGCTTGGACTGTGGAGGCTTGCT  
GGCCACTTTTTGGGGTCAGCTCCTCTGAAATGCATTAGCGGAACCGTTTGCGATCTGCCA  
CAAGTGTGATAAGTTATCTACACTGGCGAGGGGATTGCTCTCTGTAATGTTGAGCTTCTA  
ATTGTCTCTACTTTGTGAGACTACTTTTGAATGCTTGACCTCAAATCAGGTAGGACTACC  
CGCTGAACTTAA

>ABC4-59

TTTCCGTAGGTGAACCTGCGGAAGGATCATTATTGAATTATGTTTCTAGATAGGTTGTAG  
CTGGCTC-TTTAGAGCATGTGCACGCCTGTTTGGACTTCATTTTCATCCACCTGTGCACC  
TATTGTAGTCTTTGGTTGGGTTAGGAGGAAGTGGTCATTGTGTCAGCATCTGCTGGATGT  
GAGGACTTGCATTGTGAAAGCTTTGCTGTCCTTGATGTGATCATGGAATCTCTTTCTCAC  
TAGAGTCTATGTCACTCATTATACTCTGTGCAATGTCATTGAATGTCTTTACATGGGCTT  
GTATGCCTATGAAAATTGTAATAACAACCTTTCAGCAACGGATCTCTTGGCTCTCGCATCGA  
TGAAGAACGCAGCGAAATGCGATAAGTAATGTGAATTGCAGAATTCAGTGAATCATCGAA  
TCTTTGAACGCATCTTGCGCTCCTTGGTATTCCGAGGAGCATGCCTGTTTGAGTGTGATT  
AAATTCTCAACTCTCTTCTAC--TTTTTGTAAGAGAGCTTGGACTGTGGAGGCTTGCT  
GGCCACTTTTTGGGGTCAGCTCCTCTGAAATGCATTAGCGGAACCGTTTGCGATCTGCCA  
CAAGTGTGATAAGTTATCTACACTGGCGAGGGGATTGCTCTCTGTAATGTTGAGCTTCTA  
ATTGTCTCTACTTTGTGAGACTACTTTTGAATGCTTGACCTCAAATCAGGTAGGACTACC  
CGCTGAACTTAA

>ABC6-5

TTTCCGTAGGTGAACCTGCGGAAGGATCATTATTGAATTATGTTTCTAGATAGGTTGTAG  
CTGGCTC-TTTAGAGCATGTGCACGCCTGTTTGGACTTCATTTTCATCCACCTGTGCACC  
TATTGTAGTCTTTGGTTGGGTTAGGAGGAAGTGGTCATTGTGTCAGCATCTGCTGGATGT



GAGGACTTGCATTGTGAAAGCTTTGCTGTCCTTGATGTGATCATGGAATCTCTTTCTCAC  
TAGAGTCTATGTCACCTATTATACTCTGTGCAATGTCATTGAATGTCTTTACATGGGCTT  
GTATGCCTATGAAAATTGTAATACAACCTTTCAGCAACGGATCTCTTGGCTCTCGCATCGA  
TGAAGAACGCAGCGAAATGCGATAAGTAATGTGAATTGCAGAATTCAGTGAATCATCGAA  
TCTTTGAACGCATCTTGCGCTCCTTGGTATTCCGAGGAGCATGCCTGTTTGAGTGTCAAT  
AAATTCTCAACTCTCTTCTAC--TTTTTGAAAAGAGAGCTTGGACTGTGGAGGCTTGCT  
GGCCACTTTTTGGGGTCAGCTCCTCTGAAATGCATTAGCGGAACCGTTTGCGATCTGCCA  
CAAGTGTGATAAGTTATCTACACTGGCGAGGGGATTGCTCTCTGTAATGTTTCACTTCTA  
ATTGTCTCTACTTTGTGAGACTACTTTTGAATGCTTGACCTCAAATCAGGTAGGACTACC  
CGCTGAACTTAA

>ABC7-48

TTTCCGTAGGTGAACCTGCGGAAGGATCATTATTGAATTATGTTTCTAGATAGGTTGTAG  
CTGGCTC-TTTAGAGCATGTGCACGCCTGTTTGGACTTCATTTTCATCCACCTGTGCACC  
TATTGTAGTCTTTGGTTGGGTTAGGAGGAAGTGGTCATTGTGTCAGCATCTGCTGGATGT  
GAGGACTTGCATTGTGAAAGCTTTGCTGTCCTTGATGTGATCATGGAATCTCTTTCTCAC  
TAGAGTCTATGTCACCTATTATACTCTGTGCAATGTCATTGAATGTCTTTACATGGGCTT  
GTATGCCTATGAAAATTGTAATACAACCTTTCAGCAACGGATCTCTTGGCTCTCGCATCGA  
TGAAGAACGCAGCGAAATGCGATAAGTAATGTGAATTGCAGAATTCAGTGAATCATCGAA  
TCTTTGAACGCATCTTGCGCTCCTTGGTATTCCGAGGAGCATGCCTGTTTGAGTGTCAAT  
AAATTCTCAACTCTCTTCTAC--TTTTTGAAAAGAGAGCTTGGACTGTGGAGGCTTGCT  
GGCCACTTTTTGGGGTCAGCTCCTCTGAAATGCATTAGCGGAACCGTTTGCGATCTGCCA  
CAAGTGTGATAAGTTATCTACACTGGCGAGGGGATTGCTCTCTGTAATGTTTCACTTCTA  
ATTGTCTCTACTTTGTGAGACTACTTTTGAATGCTTGACCTCAAATCAGGTAGGACTACC  
CGCTGAACTTAA

>ABC11-29

TTTCCGTAGGTGAACCTGCGGAAGGATCATTATTGAATTATGTTTCTAGATAGGTTGTAG  
CTGGCTC-TTTAGAGCATGTGCACGCCTGTTTGGACTTCATTTTCATCCACCTGTGCACC  
TATTGTAGTCTTTGGTTGGGTTAGGAGGAAGTGGTCATTGTGTCAGCATCTGCTGGATGT  
GAGGACTTGCATTGTGAAAGCTTTGCTGTCCTTGATGTGATCATGGAATCTCTTTCTCAC  
TAGAGTCTATGTCACCTATTATACTCTGTGCAATGTCATTGAATGTCTTTACATGGGCTT  
GTATGCCTATGAAAATTGTAATACAACCTTTCAGCAACGGATCTCTTGGCTCTCGCATCGA  
TGAAGAACGCAGCGAAATGCGATAAGTAATGTGAATTGCAGAATTCAGTGAATCATCGAA  
TCTTTGAACGCATCTTGCGCTCCTTGGTATTCCGAGGAGCATGCCTGTTTGAGTGTCAAT  
AAATTCTCAACTCTCTTCTAC--TTTTTGAAAAGAGAGCTTGGACTGTGGAGGCTTGCT  
GGCCACTTTTTGGGGTCAGCTCCTCTGAAATGCATTAGCGGAACCGTTTGCGATCTGCCA  
CAAGTGTGATAAGTTATCTACACTGGCGAGGGGATTGCTCTCTGTAATGTTTCACTTCTA  
ATTGTCTCTACTTTGTGAGACTACTTTTGAATGCTTGACCTCAAATCAGGTAGGACTACC  
CGCTGAACTTAA

>ABC6-53

TTTCCGTAGGTGAACCTGCGGAAGGATCATTATTGAATTATGTTTCTAGATAGGTTGTAG  
CTGGCTC-TTTAGAGCATGTGCACGCCTGTTTGGACTTCATTTTCATCCACCTGTGCACC  
TATTGTAGTCTTTGGTTGGGTTAGGAGGAAGTGGTCATTGTGTCAGCATCTGCTGGATGT  
GAGGACTTGCATTGTGAAAGCTTTGCTGTCCTTGATGTGATCATGGAATCTTTTTCTCAC  
TAGAGTCTATGTCACCTATTATACTCTGTGCAATGTCATTGAATGTCTTTACATGGGCTT  
GTATGCCTATGAAAATTGTAATACAACCTTTCAGCAACGGATCTCTTGGCTCTCGCATCGA  
TGAAGAACGCAGCGAAATGCGATAAGTAATGTGAATTGCAGAATTCAGTGAATCATCGAA  
TCTTTGAACGCATCTTGCGCTCCTTGGTATTCCGAGGAGCATGCCTGTTTGAGTGTCAAT  
AAATTCTCAACTCTCTTCTAC--TTTTTGAAAAGAGAGCTTGGACTGTGGAGGCTTGCT  
GGCCACTTTTTGGGGTCAGCTCCTCTGAAATGCATTAGCGGAACCGTTTGCGATCTGCCA  
CAAGTGTGATAAGTTATCTACACTGGCGAGGGGATTGCTCTCTGTAATGTTTCACTTCTA



ATTGTCTCTACTTTGTGAGACTACTTTTGAATGCTTGACCTCAAATCAGGTAGGACTACC  
CGCTGAACTTAA

>ABC9-8

TTTCCGTAGGTGAACCTGCGGAAGGATCATTATTGAATTATGTTTCTAGATAGGTTGTAG  
CTGGCTC-TTTAGAGCATGTGCACGCCTGTTTGGACTTCATTTTCATCCACCTGTGCACC  
TATTGTAGTCTTTGGTTGGGTTAGGAGGAAGTGGTCATTGTGTCAGCATCTGCTGGATGT  
GAGGACTTGCATTGTGAAAGCTTTGCTGTCCTTGATGTGATCATGGAATCTTTTTCTCAC  
TAGAGTCTATGTCACCTATTATACTCTGTGCAATGTCATTGAATGTCTTTACATGGGCTT  
GTATGCCTATGAAAATTGTAATAACAACCTTTCAGCAACGGATCTCTTGGCTCTCGCATCGA  
TGAAGAACGCAGCGAAATGCGATAAGTAATGTGAATTGCAGAATTCAGTGAATCATCGAA  
TCTTTGAACGCATCTTGCCTCCTTGGTATTCCGAGGAGCATGCCTGTTTGAGTGTCAAT  
AAATTCTCAACTCTCTTCTAC--TTTTGTAAAAGAGAGCTTGGACTGTGGAGGCTTGCT  
GGCCACTTTTTGGGGTCAGCTCCTCTGAAATGCATTAGCGGAACCGTTTGCGATCTGCCA  
CAAGTGTGATAAGTTATCTACACTGGCGAGGGGATTGCTCTCTGTAATGTTTCAGCTTCTA  
ATTGTCTCTACTTTGTGAGACTACTTTTGAATGCTTGACCTCAAATCAGGTAGGACTACC  
CGCTGAACTTAA

>ABC7-6

TTTCCGTAGGTGAACCTGCGGAAGGATCATTATTGAATTATGTTTCTAGATAGGTTGTAG  
CTGGCTC-TTTAGAGCATGTGCACGCCTGTTTGGACTTCATTTTCATCCACCTGTGCACC  
TATTGTAGTCTTTGGTTGGGTTAGGAGGAAGTGGTCATTGTGTCAGCATCTGCTGGATGT  
GAGGACTTGCATTGTGAAAGCTTTGCTGTCCTTGATGTGATCATGGAATCTTTTTCTCAC  
TAGAGTCTATGTCACCTATTATACTCTGTGCAATGTCATTGAATGTCTTTACATGGGCTT  
ATATGCCTATGAAAATTGTAATAACAACCTTTCAGCAACGGATCTCTTGGCTCTCGCATCGA  
TGAAGAACGCAGCGAAATGCGATAAGTAATGTGAATTGCAGAATTCAGTGAATCATCGAA  
TCTTTGAACGCATCTTGCCTCCTTGGTATTCCGAGGAGCATGCCTGTTTGAGTGTCAAT  
AAATTCTCAACTCTCTTCTAC--TTTTGTAAAAGAGAGCTTGGACTGTGGAGGCTTGCT  
GGCCACTTTTTGGGGTCAGCTCCTCTGAAATGCATTAGCGGAACCGTTTGCGATCTGCCA  
CAAGTGTGATAAGTTATCTACACTGGCGAGGGGATTGCTCTCTGTAATGTTTCAGCTTCTA  
ATTGTCTCTACTTTGTGAGACTACTTTTGAATGCTTGACCTCAAATCAGGTAGGACTACC  
CGCTGAACTTAA

>ABC6-55

TTTCCGTAGGTGAACCTGCGGAAGGATCATTATTGAATTATGTTTCTAGATAGGTTGTAG  
CTGGCTC-TTTAGAGCATGTGCACGCCTGTTTGGACTTCATTTTCATCCACCTGTGCACC  
TATTGTAGTCTTTGGTTGGGTTAGGAGGAAGTGGTCATTGTGTCAGCATCTGCTGGATGT  
GAGGACTTGCATTGTGAAAGCTTTGCTGTCCTTGATGTGATCATGGAATCTTTTTCTCAC  
TAGAGTCTATGTCACCTATTATACTCTGTGCAATGTCATTGAATGTCTTTACATGGGCTT  
ATATGCCTATGAAAATTGTAATAACAACCTTTCAGCAACGGATCTCTTGGCTCTCGCATCGA  
TGAAGAACGCAGCGAAATGCGATAAGTAATGTGAATTGCAGAATTCAGTGAATCATCGAA  
TCTTTGAACGCATCTTGCCTCCTTGGTATTCCGAGGAGCATGCCTGTTTGAGTGTCAAT  
AAATTCTCAACTCTCTTCTAC--TTTTGTAAAAGAGAGCTTGGACTGTGGAGGCTTGCT  
GGCCACTTTTTGGGGTCAGCTCCTCTGAAATGCATTAGCGGAACCGTTTGCGATCTGCCA  
CAAGTGTGATAAGTTATCTACACTGGCGAGGGGATTGCTCTCTGTAATGTTTCAGCTTCTA  
ATTGTCTCTACTTTGTGAGACTACTTTTGAATGCTTGACCTCAAATCAGGTAGGACTACC  
CGCTGAACTTAA

>ABC9-43

TTTCCGTAGGTGAACCTGCGGAAGGATCATTATTGAATTATGTTTCTAGATAGGTTGTAG  
CTGGCTC-TTTAGAGCATGTGCACGCCTGTTTGGACTTCATTTTCATCCACCTGTGCACC  
TATTGTAGTCTTTGGTTGGGTTAGGGGGAAGTGGTCATTGTGTCAGCATCTGCTGGATGT  
GAGGACTTGCATTGTGAAAGCTTTGCTGTCCTTGATGTGATCATGGAATCTTTTTCTCAC  
TAGAGTCTATGTCACCTATTATACTCTGTGCAATGTCATTGAATGTCTTTACATGGGCTT



GTATGCCTATGAAAATTGTAATACAACCTTTTCAGCAACGGATCTCTTGGCTCTCGCATCGA  
TGAAGAACGCAGCGAAATGCGATAAGTAATGTGAATTGCAGAATTCAGTGAATCATCGAA  
TCTTTGAACGCATCTTGCCTCCTTGGTATTCCGAGGAGCATGCCTGTTTGAGTGTCAAT  
AAATTCTCAACTCTCTTCTAC--TTTTTGAAAAGAGAGCTTGGACTGTGGAGGCTTGCT  
GGCCACTTTTTGGGGTCAGCTCCTCTGAAATGCATTAGCGGAACCGTTTGCGATCTGCCA  
CAAGTGTGATAAGTTATCTACACTGGCGAGGGGATTGCTCTCTGTAATGTTTCAGCTTCTA  
ATTGTCTCTACTTTGTGAGACTACTTTTGAATGCTTGACCTCAAATCAGGTAGGACTACC  
CGCTGAACTTAA

>ABC4-43

TTTCCGTAGGTGAACCTGCGGAAGGATCATTATTGAATTATGTTTCTAGATAGGTTGTAG  
CTGGCTC-TTTAGAGCATGTGCACGCCTGTTTGGACTTCATTTTCATCCACCTGTGCACC  
TATTGTAGTCTTTGGTTGGGTTAGGGGGAAGTGGTCATTGTGTCAGCATCTGCTGGATGT  
GAGGACTTGCATTGTGAAAGCTTTGCTGTCCTTGATGTGATCATGGAATCTTTTTCTCAC  
TAGAGTCTATGTCACCTCATTATACTCTGTCTGAATGTCATTGAATGTCTTTACATGGGCTT  
ATATGCCTATGAAAATTGTAATACAACCTTTTCAGCAACGGATCTCTTGGCTCTCGCATCGA  
TGAAGAACGCAGCGAAATGCGATAAGTAATGTGAATTGCAGAATTCAGTGAATCATCGAA  
TCTTTGAACGCATCTTGCCTCCTTGGTATTCCGAGGAGCATGCCTGTTTGAGTGTCAAT  
AAATTCTCAACTCTCTTCTAC--TTTTTGAAAAGAGAGCTTGGACTGTGGAGGCTTGCT  
GGCCACTTTTTGGGGTCAGCTCCTCTGAAATGCATTAGCGGAACCGTTTGCGATCTGCCA  
CAAGTGTGATAAGTTATCTACACTGGCGAGGGGATTGCTCTCTGTAATGTTTCAGCTTCTA  
ATTGTCTCTACTTTGTGAGACTACTTTTGAATGCTTGACCTCAAATCAGGTAGGACTACC  
CGCTGAACTTAA

>ABC4-10

TTTCCGTAGGTGAACCTGCGGAAGGATCATTATTGAATTATGTTTCTAGATAGGTTGTAG  
CTGGCTC-TTTAGAGCATGTGCACGCCTGTTTGGACTTCATTTTCATCCACCTGTGCACC  
TATTGTAGTCTTTGGTTGGGTTAGGGGGAAGTGGTCATTGTGTCAGCATCTGCTGGATGT  
GAGGACTTGCATTGTGAAAGCTTTGCTGTCCTTGATGTGATCATGGAATCTCTTTCTCAC  
TAGAGTCTATGTCACCTCATTATACTCTGTCTGAATGTCATTGAATGTCTTTACATGGGCTT  
GTATGCCTATGAAAATTGTAATACAACCTTTTCAGCAACGGATCTCTTGGCTCTCGCATCGA  
TGAAGAACGCAGCGAAATGCGATAAGTAATGTGAATTGCAGAATTCAGTGAATCATCGAA  
TCTTTGAACGCATCTTGCCTCCTTGGTATTCCGAGGAGCATGCCTGTTTGAGTGTCAAT  
AAATTCTCAACTCTCTTCTAC--TTTTTGAAAAGAGAGCTTGGACTGTGGAGGCTTGCT  
GGCCACTTTTTGGGGTCAGCTCCTCTGAAATGCATTAGCGGAACCGTTTGCAATCTGCCA  
CAAGTGTGATAAGTTATCTACACTGGCGAGGGGATTGCTCTCTGTAATGTTTCAGCTTCTA  
ATTGTCTCTACTTTGTGAGACTACTTTTGAATGCTTGACCTCAAATCAGGTAGGACTACC  
CGCTGAACTTAA

>ABC7-10

TTTCCGTAGGTGAACCTGCGGAAGGATCATTATTGAATTATGTTTCTAGATAGGTTGTAG  
CTGGCTC-TTTAGAGCATGTGCACGCCTGTTTGGACTTCATTTTCATCCACCTGTGCACC  
TATTGTAGTCTTTGGTTGGGTTAGGGGGAAGTGGTCATTGTGTCAGCATCTGCTGGATGT  
GAGGACTTGCATTGTGAAAGCTTTGCTGTCCTTGATGTGATCATGGAATCTCTTTCTCAC  
TAGAGTCTATGTCACCTCATTATACTCTGTCTGAATGTCATTGAATGTCTTTACATGGGCTT  
ATATGCCTATGAAAATTGTAATACAACCTTTTCAGCAACGGATCTCTTGGCTCTCGCATCGA  
TGAAGAACGCAGCGAAATGCGATAAGTAATGTGAATTGCAGAATTCAGTGAATCATCGAA  
TCTTTGAACGCATCTTGCCTCCTTGGTATTCCGAGGAGCATGCCTGTTTGAGTGTCAAT  
AAATTCTCAACTCTCTTCTAC--TTTTTGAAAAGAGAGCTTGGACTGTGGAGGCTTGCT  
GGCCACTTTTTGGGGTCAGCTCCTCTGAAATGCATTAGCGGAACCGTTTGCAATCTGCCA  
CAAGTGTGATAAGTTATCTACACTGGCGAGGGGATTGCTCTCTGTAATGTTTCAGCTTCTA  
ATTGTCTCTACTTTGTGAGACTACTTTTGAATGCTTGACCTCAAATCAGGTAGGACTACC  
CGCTGAACTTAA



>ABC10-42

TTTCCGTAGGTGAACCTGCGGAAGGATCATTATTGAATTATGTTTCTAGATAGGTTGTAG  
CTGGCTC-TTTAGAGCATGTGCACGCCTGTTTGGACTTCATTTTCATCCACCTGTGCACC  
TATTGTAGTCTTTGGTTGGGTTAGGGGGAAGTGGTCATTGTGTCAGCATCTGCTGGATGT  
GAGGACTTGCATTGTGAAAGCTTTGCTGTCCTTGATGTGATCATGGAATCTCTTTCTCAC  
TAGAGTCTATGTCACCTCATTATACTCTGTGCGAATGTCATTGAATGTCTTTACATGGGCTT  
ATATGCCTATGAAAATTGTAATACAACCTTTCAGCAACGGATCTCTTGGCTCTCGCATCGA  
TGAAGAACGCAGCGAAATGCGATAAGTAATGTGAATTGCAGAATTCAGTGAATCATCGAA  
TCTTTGAACGCATCTTGCGCTCCTTGGTATTCCGAGGAGCATGTCTGTTTGAGTGTCAAT  
AAATTCTCAACTCTCTTCTAC--TTTTGTAAAAGAGAGCTTGGACTGTGGAGGCTTGCT  
GGCCACTTTTTGGGGTCAGCTCCTCTGAAATGCATTAGCGGAACCGTTTGCGATCTGCCA  
CAAGTGTGATAAGTTATCTACACTGGCGAGGGGATTGCTCTCTGTAATGTTTCAGCTTCTA  
ATTGTCTCTACTTTGTGAGACTACTTTTGAATGCTTGACCTCAAATCAGGTAGGACTACC  
CGCTGAACTTAA

>ABC12-17

TTTCCGTAGGTGAACCTGCGGAAGGATCATTATTGAATTATGTTTCTAGATAGGTTGTAG  
CTGGCTC-TTTAGAGCATGTGCACGCCTGTTTGGACTTCATTTTCATCCACCTGTGCACC  
TATTGTAGTCTTTGGTTGGGTTAGGAGGAAGTGGTCATTGTGTCAGCATCTGCTGGATGT  
GAGGACTTGCATTGTGAAAGCTTTGCTGTCCTTGATGTGATCATGGAATCTCTTTCTCAC  
TAGAGTCTATGTCACCTCATTATACTCAGTCGAATGTCATTGAATGTCTTTACATGGGCTT  
ATATGCCTATGAAAATTGTAATACAACCTTTCAGCAACGGATCTCTTGGCTCTCGCATCGA  
TGAAGAACGCAGCGAAATGCGATAAGTAATGTGAATTGCAGAATTCAGTGAATCATCGAA  
TCTTTGAACGCATCTTGCGCTCCTTGGTATTCCGAGGAGCATGCCTGTTTGAGTGTCAAT  
AAATTCTCAACTCTCTTCTAC--TTTTGTAAAAGAGAGCTTGGACTGTGGAGGCTTGCT  
GGCCACTTTTTGGGGTCAGCTCCTCTGAAATGCATTAGCGGAACCGTTTGCGATCTGCCA  
CAAGTGTGATAAGTTATCTACACTGGCGAGGGGATTGCTCTCTGTAATGTTTCAGCTTCTA  
ATTGTCTCTACTTTGTGAGACTACTTTTGAATGCTTGACCTCAAATCAGGTAGGACTACC  
CGCTGAACTTAA

>ABC2-15

TTTCCGTAGGTGAACCTGCGGAAGGATCATTATTGAATTATGTTTCTAGATAGGTTGTAG  
CTGGCTC-TTTAGAGCATGTGCACGCCTGTTTGGACTTCATTTTCATCCACCTGTGCACC  
TATTGTAGTCTTTGGTTGGGTTAGGAGGAAGTGGTCATTGTGTCAGCATCTGCTGGATGT  
GAGGACTTGCATTGTGAAAGCTTTGCTGTCCTTGATGTGATCATGGAATCTCTTTCTCAC  
TAGAGTCTATGTCACCTCATTATACTCTGTGCGAATGTCATTGAATGTCTTTACATGGGCTT  
ATATGCCTATGAAAATTGTAATACAACCTTTCAGCAACGGATCTCTTGGCTCTCGCATCGA  
TGAAGAACGCAGCGAAATGCGATAAGTAATGTGAATTGCAGAATTCAGTGAATCATCGAA  
TCTTTGAACGCATCTTGCGCTCCTTGGTATTCCGAGGAGCATGCATGTTTGAGTGTCAAT  
AAATTCTCAACTCTCTTCTAC--TTTTGTAAAAGAGAGCTTGGACTGTGGAGGCTTGCT  
GGCCACTTTTTGGGGTCAGCTCCTCTGAAATGCATTAGCGGAACCGTTTGCGATCTGCCA  
CAAGTGTGATAAGTTATCTACACTGGCGAGGGGATTGCTCTCTGTAATGTTTCAGCTTCTA  
ATTGTCTCTACTTTGTGAGACTACTTTTGAATGCTTGACCTCAAATCAGGTAGGACTACC  
CGCTGAACTTAA

>ABC6-29

TTTCCGTAGGTGAACCTGCGGAAGGATCATTATTGAATTATGTTTCTAGATAGGTTGTAG  
CTGGCTC-TTTAGAGCATGTGCACGCCTGTTTGGACTTCATTTTCATCCACCTGTGCACC  
TATTGTAGTCTTTGGTTGGGTTAGGGGGAAGTGGTCATTGTGTCAGCATCTGCTGGATGT  
GAGGACTTGCATTGTGAAAGCTTTGCTGTCCTTGATGTGATCATGGAATCTCTTTCTCAC  
TAGAGTCTATGTCACCTCATTATACTCTGTGCGAATGTCATTGAATGTCTTTACATGGGCGT  
GTATGCCTATGAAAATTGTAATACAACCTTTCAGCAACGGATCTCTTGGCTCTCGCATCGA  
TGGAGGACGCAGCGAAATGCGATAAGTAATGTGAATTGCAGAATTCAGTGAATCATCGAA



TCTTTGAACGCATCTTGCGCTCCTTGGTATTCCGAGGAGCATGCCTGTTTGAGTGTCAATT  
AAATTCTCAACTCTCTTCTAC--TTTTTGAAAAGAGAGCTTGGACTGTGGAGGCTTGCT  
GGCCACTTTTTGGGGTCAGCTCCTCTGAAATGCATTAGCGGAACCGTTTGCGATCTGCCA  
CAAGTGTGATAAGTTATCTACACTGGCGAGGGGATTGCTCTCTGTAATGTTTCAGCTTCTA  
ATTGTCTCTACTTTGTGAGACTACTTTTGAATGCTTGACCTCAAATCAGGTAGGACTACC  
CGCTGAACTTAA

>ABC7-18

TTTCCGTAGGTGAACCTGCGGAAGGATCATTATTGAATTATGTTTCTAGATAGGTTGTAG  
CTGGCTC-TTTAGAGCATGTGCACGCCTGTTTGGACTTCATTTTCATCCACCTGTGCACC  
TATTGTAGTCTTTGGTTGGGTTAGGAGGAAGTGATCATTGTATCAGCATCTGCTGGGAGT  
GAGGACTTGCAATTGTGAAAGCTTTGCTGTCTTGATGTGATCATGGAATCTTTTCTCAC  
TAGAGTCTATGTCACTCATTATACTCTGTGCAATGTCATTGAATGTCTTTACATGGGCTT  
ATATGCCTATGAAAATTGTAATACAACCTTTCAGCAACGGATCTCTTGGCTCTCGCATCGA  
TGAAGAACGCAGCGAAATGCGATAAGTAATGTGAATTGCAGAATTCAGTGAATCATCGAA  
TCTTTGAACGCATCTTGCGCTCCTTGGTATTCCGAGGAGCATGCCTGTTTGAGTGTCAATT  
AAATTCTCAACTCTCTTCTAC--TTTTTGAAAAGAGAGCTTGGACTGTGGAGGCTTGCT  
GGCCACTTTTTGGGGTCAGCTCCTCTGAAATGCATTAGCGGAACCGTTTGCGATCTGCCA  
CAAGTGTGATAAGTTATCTACACTGGCGAGGGGATTGCTCTCTGTAATGTTTCAGCTTCTA  
ATTGTCTCTACTTTGTGAGACTACTTTTGAATGCTTGACCTCAAATCAGGTAGGACTACC  
CGCTGAACTTAA

>ABC9-6

TTTCCGTAGGTGAACCTGCGGAAGGATCATTATTGAATTATGTTTCTAGATAGGTTGTAG  
CTGGCTC-TTTAGAGCATGTGCACGCCTGTTTGGACTTCATTTTCATCCACCTGTGCACC  
TATTGTAGTCTTTGGTTGGGTTAGGGGGAAGTGATCATTGTATCAGCATCTGCTGGGAGT  
GAGGACTTGCAATTGTGAAAGCTTTGCTGTCTTGATGTGATCATGGAATCTTTTCTCAC  
TAGAGTCTATGTCACTCATTATACTCTGTGCAATGTCATTGAATGTCTTTACATGGGCTT  
GTATGCCTATGAAAATTGTAATACAACCTTTCAGCAACGGATCTCTTGGCTCTCGCATCGA  
TGAAGAACGCAGCGAAATGCGATAAGTAATGTGAATTGCAGAATTCAGTGAATCATCGAA  
TCTTTGAACGCATCTTGCGCTCCTTGGTATTCCGAGGAGCATGCCTGTTTGAGTGTCAATT  
AAATTCTCAACTCTCTTCTAC--TTTTTGAAAAGAGAGCTTGGACTGTGGAGGCTTGCT  
GGCCACTTTTTGGGGTCAGCTCCTCTGAAATGCATTAGCGGAACCGTTTGCGATCTGCCA  
CAAGTGTGATAAGTTATCTACACTGGCGAGGGGATTGCTCTCTGTAATGTTTCAGCTTCTA  
ATTGTCTCTACTTTGTGAGACTACTTTTGAATGCTTGACCTCAAATCAGGTAGGACTACC  
CGCTGAACTTAA

>ABC7-45

TTTCCGTAGGTGAACCTGCGGAAGGATCATTATTGAATTATGTTTCTAGATAGGTTGTAG  
CTGGCTC-TTTAGAGCATGTGCACGCCTGTTTGGACTTCATTTTCATCCACCTGTGCACC  
TATTGTAGTCTTTGGTTGGGTTAGGGGGAAGTGGTCATTGTGTCAGCATCTGCTGGGAGT  
GAGGACTTGCAATTGTGAAAGCTTTGCTGTCTTGATGTGATCATGGAATCTTTTCTCAC  
TAGAGTCTATGTCACTCATTATACTCTGTGCAATGTCATTGAATGTCTTTACATGGGCTT  
GTATGCCTATGAAAATTGTAATACAACCTTTCAGCAACGGATCTCTTGGCTCTCGCATCGA  
TGAAGAACGCAGCGAAATGCGATAAGTAATGTGAATTGCAGAATTCAGTGAATCATCGAA  
TCTTTGAACGCATCTTGCGCTCCTTGGTATTCCGAGGAGCATGCCTGTTTGAGTGTCAATT  
AAATTCTCAACTCTCTTCTAC--TTTTTGAAAAGAGAGCTTGGACTGTGGAGGCTTGCT  
GGCCACTTTTTGGGGTCAGCTCCTCTGAAATGCATTAGCGGAACCGTTTGCAATCTGCCA  
CAAGTGTGATAAGTTATCTACACTGGCGAGGGGATTGCTCTCTGTAATGTTTCAGCTTCTA  
ATTGTCTCTACTTTGTGAGACAACTTTTGAATGCTTGACCTCAAATCAGGTAGGACTACC  
CGCTGAACTTAA

>ABC7-27

TTTCCGTAGGTGAACCTGCGGAAGGATCATTATTGAATTATGTTTCTAGATAGGTTGTAG



CTGGCTC-TTTAGAGCATGTGCACGCCTGTTTGGACTTCATTTTCATCCACCTGTGCACC  
TATTGTAGTCTTTGGTTGGGTTAGGAGGAAGTGATCATTGTATCAGCATCTGCTGGGAGT  
GAGGACTTGCATTGTGAAAGCTTTGCTGTCCTTGATGTGATCATGGAATCTTTTCTCAC  
TAGAGTCTATGTCACCTATTATACTCTGTGCAATGTCATTGAATGTCTTTACATGGGCTT  
GTATGCCTATGAAAATTGTAATACAACCTTTCAGCAACGGATCTCTTGGCTCTCGCATCGA  
TGAAGAACGCAGCGAAATGCGATAAGTAATGTGAATTGCAGAATTCAGTGAATCATCGAA  
TCTTTGAACGCATCTTGCCTCCTTGGTATTCCGAGGAGCATGCCTGTTTGAGTGTCATT  
AAATTCTCAACTCTCTTCTAC--TTTTTGTAAGAGAGCTTGGACTGTGGAGGCTTGCT  
GGCCACTTTTGGGGTCAGCTCCTCTGAAATGCATTAGCGGAACCGTTTGCGATCTGCCA  
CAAGTGTGATAAGTTATCTACACTGGCGAGGGGATTGCTCTCTGTAATGTTGAGCTTCTA  
ATTGTCTCTACTTTGTGAGACAACCTTTGAATGCTTGACCTCAAATCAGGTAGGACTACC  
CGCTGAACTTAA

>ABC9-11

TTTCCGTAGGTGAACCTGCGGAAGGATCATTATTGAATTATGTTTCTAGATAGGTTGTAG  
CTGGCTC-TTTAGAGCATGTGCACGCCTGTTTGGACTTCATTTTCATCCACCTGTGCACC  
TATTGTAGTCTTTGGTTGGGTTAGGAGGAAGTGGTCATTGTATCAGCATCTGCTGGGAGT  
GAGGACTTGCATTGTGAAAGCTTTGCTGTCCTTGATGTGATCATGGAATCTTTTCTCAC  
TAGAGTCTATGTCACCTATTATACTCTGTGCAATGTCATTGAATGTCTTTACATGGGCTT  
GTATGCCTATGAAAATTGTAATACAACCTTTCAGCAACGGATCTCTTGGCTCTCGCATCGA  
TGAAGAACGCAGCGAAATGCGATAAGTAATGTGAATTGCAGAATTCAGTGAATCATCGAA  
TCTTTGAACGCATCTTGCCTCCTTGGTATTCCGAGGAGCATGCCTGTTTGAGTGTCATT  
AAATTCTCAACTCTCTTCTAC--TTTTTGTAAGAGAGCTTGGACTGTGGAGGCTTGCT  
GGCCACTTTTGGGGTCAGCTCCTCTGAAATGCATTAGCGGAACCGTTTGCGATCTGCCA  
CAAGTGTGATAAGTTATCTACACTGGCGAGGGGATTGCTCTCTGTAATGTTGAGCTTCTA  
ATTGTCTCTACTTTGTGAGACAACCTTTGAATGCTTGACCTCAAATCAGGTAGGACTACC  
CGCTGAACTTAA

>ABC3-37

TTTCCGTAGGTGAACCTGCGGAAGGATCATTATTGAATTATGTTTCTAGATAGGTTGTAG  
CTGGCTC-TTTAGAGCATGTGCACGCCTGTTTGGACTTCATTTTCATCCACCTGTGCACC  
TATTGTAGTCTTTGGTTGGGTTAGGAGGAAGTGGTCATTGTGTCAGCATCTGCTGGATGT  
GAGGACTTGCATTGTGAAAGCTTTGCTGTCCTTGATGTGATCATGGAATCTCTTTCTCAC  
TAGAGTCTATGTCACCTATTATACTCTGTGCAATGTCATTGAATGTCTTTACATGGGCTT  
ATATGCCTATGAAAATTGTAATACAACCTTTCAGCAACGGATCTCTTGGCTCTCGCATCGA  
TGAAGAACGCAGCGAAATGCGATAAGTAATGTGAATTGCAGAATTCAGTGAATCATCGAA  
TCTTTGAACGCATCTTGCCTCCTTGGTATTCCGAGGAGCATGCCTGTTTGAGTGTCATT  
AAATTCTCAACTCTCTTCTAC--TTTTTGTAAGAGAGCTTGGACTGTGGAGGCTTGCT  
GGCCAC-TTTTGGGGTCAGCTCCTCTGAAATGCATTAGCGGAACCGTTTGCGATCTGCCA  
CAAGTGTGATAAGTTATCTACACTGGCGAGGGGATTGCTCTCTGTAATGTTGAGCTTCTA  
ATTGTCTCTACTTTGTGAGACTACTTTTGAATGCTTGACCTCAAATCAGGTAGGACTACC  
CGCTGAACTTAA

>ABC3-19

TTTCCGTAGGTGAACCTGCGGAAGGATCATTATTGAATTATGTTTCTAGATAGGTTGTAG  
CTGGCTC-TTTAGAGCATGTGCACGCCTGTTTGGACTTCATTTTCATCCACCTGTGCACC  
TATTGTAGTCTTTGGTTGGGTTAGGAGGAAGTGGTCATTGTGTCAGCATCTGCTGGATGT  
GAGGACTTGCATTGTGAAAGCTTTGCTGTCCTTGATGTGATCATGGAATCTCTTTCTCAC  
TAGAGTCTATGTCACCTATTATACTCTGTGCAATGTCATTGAATGTCTTTACATGGGCTT  
ATATGCCTATGAAAATTGTAATACAACCTTTCAGCAACGGATCTCTTGGCTCTCGCATCGA  
TGAAGAACGCAGCGAAATGCGATAAGTAATGTGAATTGCAGAATTCAGTGAATCATCGAA  
TCTTTGAACGCATCTTGCCTCCTTGGTATTCCGAGGAGCATGCCTGTTTGAGTGTCATT  
AAATTCTCAACTCTCTTCTAC--TTTTTGTAAGAGAGCTTGGACTGTGGAGGCTTGCT



GGCCAC–TTTTGGGGTCAGCTCCTCTGAAATGCATTAGCGGAACCGTTTGCGATCTGCCA  
CAAGTGTGATAAGTTATCTACACTGGCGAGGGGATTGCTCTCTGTAATGTTGAGCTTCTA  
ATTGTCTCTACTTTGTGAGACTACTTTTGAATGCTTGACCTCAAATCAGGTAGGACTACC  
CGCTGAACTTAA
